# Supplementary material
Source: publisher figshare collection journal article supplement (https://acs.figshare.com/ndownloader/files/7584538)
Supplement: Supplementary file 1 [file 7584538]

 
data_p
 
_audit_creation_method            SHELXL-2014
_chemical_name_systematic
;
 ?
;
_chemical_name_common             ?
_chemical_melting_point           ?
_chemical_formula_moiety          'C15 H23 N3 O3'
_chemical_formula_sum
 'C15 H23 N3 O3' 
_chemical_formula_weight          293.36

loop_
 _atom_type_symbol
 _atom_type_description
 _atom_type_scat_dispersion_real
 _atom_type_scat_dispersion_imag
 _atom_type_scat_source
 'C'  'C'   0.0181   0.0091
 'International Tables Vol C Tables 4.2.6.8 and 6.1.1.4'
 'H'  'H'   0.0000   0.0000
 'International Tables Vol C Tables 4.2.6.8 and 6.1.1.4'
 'N'  'N'   0.0311   0.0180
 'International Tables Vol C Tables 4.2.6.8 and 6.1.1.4'
 'O'  'O'   0.0492   0.0322
 'International Tables Vol C Tables 4.2.6.8 and 6.1.1.4'
 
_space_group_crystal_system       orthorhombic
_space_group_IT_number            61
_space_group_name_H-M_alt         'P b c a'
_space_group_name_Hall            '-P 2ac 2ab'
 
_shelx_space_group_comment
;
The symmetry employed for this shelxl refinement is uniquely defined
by the following loop, which should always be used as a source of
symmetry information in preference to the above space-group names.
They are only intended as comments.
;
 
loop_
 _space_group_symop_operation_xyz
 'x, y, z'
 '-x+1/2, -y, z+1/2'
 'x+1/2, -y+1/2, -z'
 '-x, y+1/2, -z+1/2'
 '-x, -y, -z'
 'x-1/2, y, -z-1/2'
 '-x-1/2, y-1/2, z'
 'x, -y-1/2, z-1/2'
 
_cell_length_a                    16.5344(8)
_cell_length_b                    9.4279(5)
_cell_length_c                    20.9981(12)
_cell_angle_alpha                 90
_cell_angle_beta                  90
_cell_angle_gamma                 90
_cell_volume                      3273.3(3)
_cell_formula_units_Z             8
_cell_measurement_temperature     293(2)
_cell_measurement_reflns_used      7834
_cell_measurement_theta_min        4.21
_cell_measurement_theta_max       68.29
 
_exptl_crystal_description        block
_exptl_crystal_colour             colorless 
_exptl_crystal_density_meas       ? 
_exptl_crystal_density_method     ?              
_exptl_crystal_density_diffrn     1.195       
_exptl_crystal_F_000              1072
_exptl_transmission_factor_min    ?                                             
_exptl_transmission_factor_max    ?                                             
_exptl_crystal_size_max           0.05 
_exptl_crystal_size_mid           0.04 
_exptl_crystal_size_min           0.03  
_exptl_absorpt_coefficient_mu     0.683
_shelx_estimated_absorpt_T_min    ? 
_shelx_estimated_absorpt_T_max    ? 
_exptl_absorpt_correction_type    none 
_exptl_absorpt_correction_T_min   ? 
_exptl_absorpt_correction_T_max   ? 
_exptl_absorpt_process_details    ? 
 
_exptl_special_details
;
 ?
;
 
_diffrn_ambient_temperature       293(2)
_diffrn_radiation_wavelength      1.54178
_diffrn_radiation_type            CuK\a
_diffrn_source                    'sealed tube'                      
_diffrn_measurement_device_type   'CCD area detector'
_diffrn_measurement_method        'phi and omega scans' 
_diffrn_detector_area_resol_mean  ? 
_diffrn_reflns_number             11286
_diffrn_reflns_av_unetI/netI      0.0194
_diffrn_reflns_av_R_equivalents   0.0216
_diffrn_reflns_limit_h_min        -19
_diffrn_reflns_limit_h_max        19
_diffrn_reflns_limit_k_min        -11
_diffrn_reflns_limit_k_max        8
_diffrn_reflns_limit_l_min        -24
_diffrn_reflns_limit_l_max        25
_diffrn_reflns_theta_min          4.211
_diffrn_reflns_theta_max          68.294
_diffrn_reflns_theta_full         67.679
_diffrn_measured_fraction_theta_max   0.995
_diffrn_measured_fraction_theta_full  0.997
_diffrn_reflns_Laue_measured_fraction_max    0.995
_diffrn_reflns_Laue_measured_fraction_full   0.997
_diffrn_reflns_point_group_measured_fraction_max   0.995
_diffrn_reflns_point_group_measured_fraction_full  0.997
_reflns_number_total              2983
_reflns_number_gt                 2438
_reflns_threshold_expression      'I > 2\s(I)'
_reflns_Friedel_coverage          0.000
_reflns_Friedel_fraction_max      .
_reflns_Friedel_fraction_full     .
 
_reflns_special_details
;
 Reflections were merged by SHELXL according to the crystal
 class for the calculation of statistics and refinement.
 
 _reflns_Friedel_fraction is defined as the number of unique
 Friedel pairs measured divided by the number that would be
 possible theoretically, ignoring centric projections and
 systematic absences.
;
 
_computing_data_collection         'Bruker APEX2'
_computing_cell_refinement        'Bruker SAINT'
_computing_data_reduction         'Bruker SAINT'
_computing_structure_solution     'SHELXS-97 (Sheldrick 2008)'
_computing_structure_refinement   'SHELXL-2014 (Sheldrick, 2014)'
_computing_molecular_graphics     'Bruker SHELXTL'
_computing_publication_material   'Bruker SHELXTL'
 
_refine_special_details
;
 ?
;
_refine_ls_structure_factor_coef  Fsqd
_refine_ls_matrix_type            full
_refine_ls_weighting_scheme       calc
_refine_ls_weighting_details
'w=1/[\s^2^(Fo^2^)+(0.0854P)^2^+0.8340P] where P=(Fo^2^+2Fc^2^)/3'
_atom_sites_solution_primary      ?
_atom_sites_solution_secondary    ?
_atom_sites_solution_hydrogens    geom
_refine_ls_hydrogen_treatment     constr
_refine_ls_extinction_method      none
_refine_ls_extinction_coef        .
_refine_ls_number_reflns          2983
_refine_ls_number_parameters      194
_refine_ls_number_restraints      0
_refine_ls_R_factor_all           0.0563
_refine_ls_R_factor_gt            0.0465
_refine_ls_wR_factor_ref          0.1437
_refine_ls_wR_factor_gt           0.1339
_refine_ls_goodness_of_fit_ref    0.982
_refine_ls_restrained_S_all       0.982
_refine_ls_shift/su_max           0.025
_refine_ls_shift/su_mean          0.004
 
loop_
 _atom_site_label
 _atom_site_type_symbol
 _atom_site_fract_x
 _atom_site_fract_y
 _atom_site_fract_z
 _atom_site_U_iso_or_equiv
 _atom_site_adp_type
 _atom_site_occupancy
 _atom_site_site_symmetry_order  
 _atom_site_calc_flag
 _atom_site_refinement_flags_posn
 _atom_site_refinement_flags_adp
 _atom_site_refinement_flags_occupancy
 _atom_site_disorder_assembly
 _atom_site_disorder_group
C1 C 0.36846(10) 0.55645(18) 0.19181(8) 0.0476(4) Uani 1 1 d . . . . .
C2 C 0.31418(14) 0.5195(3) 0.14493(10) 0.0734(6) Uani 1 1 d . . . . .
H2 H 0.2821 0.4391 0.1493 0.088 Uiso 1 1 calc R U . . .
C3 C 0.30807(16) 0.6034(3) 0.09146(11) 0.0882(8) Uani 1 1 d . . . . .
H3 H 0.2722 0.5795 0.0591 0.106 Uiso 1 1 calc R U . . .
C4 C 0.35510(16) 0.7220(3) 0.08629(11) 0.0780(7) Uani 1 1 d . . . . .
H4 H 0.3512 0.7819 0.0512 0.094 Uiso 1 1 calc R U . . .
C5 C 0.40767(15) 0.7490(3) 0.13434(11) 0.0758(7) Uani 1 1 d . . . . .
H5 H 0.4405 0.8286 0.1308 0.091 Uiso 1 1 calc R U . . .
C6 C 0.37882(10) 0.46161(18) 0.25070(9) 0.0465(4) Uani 1 1 d . . . . .
C7 C 0.41966(11) 0.3234(2) 0.23033(11) 0.0587(5) Uani 1 1 d . . . . .
H7A H 0.4277 0.2641 0.2670 0.088 Uiso 1 1 calc R U . . .
H7B H 0.4710 0.3443 0.2111 0.088 Uiso 1 1 calc R U . . .
H7C H 0.3859 0.2750 0.2001 0.088 Uiso 1 1 calc R U . . .
C8 C 0.42895(11) 0.5321(2) 0.30264(9) 0.0529(4) Uani 1 1 d . . . . .
H8A H 0.4040 0.6201 0.3147 0.079 Uiso 1 1 calc R U . . .
H8B H 0.4825 0.5502 0.2869 0.079 Uiso 1 1 calc R U . . .
H8C H 0.4319 0.4706 0.3390 0.079 Uiso 1 1 calc R U . . .
C9 C 0.24326(11) 0.51831(17) 0.29326(9) 0.0490(4) Uani 1 1 d . . . . .
C10 C 0.16498(10) 0.46090(19) 0.31956(9) 0.0506(4) Uani 1 1 d . . . . .
H10A H 0.1584 0.3630 0.3063 0.061 Uiso 1 1 calc R U . . .
H10B H 0.1201 0.5151 0.3025 0.061 Uiso 1 1 calc R U . . .
C11 C 0.16361(10) 0.4689(2) 0.39284(10) 0.0542(4) Uani 1 1 d . . . . .
H11 H 0.1747 0.5671 0.4055 0.065 Uiso 1 1 calc R U . . .
C12 C 0.08088(12) 0.4271(3) 0.41890(12) 0.0702(6) Uani 1 1 d . . . . .
H12A H 0.0703 0.3295 0.4089 0.105 Uiso 1 1 calc R U . . .
H12B H 0.0400 0.4857 0.3999 0.105 Uiso 1 1 calc R U . . .
H12C H 0.0803 0.4398 0.4643 0.105 Uiso 1 1 calc R U . . .
C13 C 0.29643(11) 0.4279(2) 0.44183(8) 0.0507(4) Uani 1 1 d . . . . .
C14 C 0.42097(12) 0.3530(3) 0.48803(11) 0.0711(6) Uani 1 1 d . . . . .
H14A H 0.4383 0.4464 0.4743 0.085 Uiso 1 1 calc R U . . .
H14B H 0.4616 0.2851 0.4745 0.085 Uiso 1 1 calc R U . . .
C15 C 0.41501(17) 0.3507(3) 0.55815(13) 0.0873(8) Uani 1 1 d . . . . .
H15A H 0.3801 0.4259 0.5721 0.131 Uiso 1 1 calc R U . . .
H15B H 0.4678 0.3635 0.5763 0.131 Uiso 1 1 calc R U . . .
H15C H 0.3933 0.2612 0.5717 0.131 Uiso 1 1 calc R U . . .
N1 N 0.41560(11) 0.66843(18) 0.18680(8) 0.0626(5) Uani 1 1 d . . . . .
N2 N 0.29846(9) 0.42337(14) 0.27531(7) 0.0470(4) Uani 1 1 d . . . . .
H2A H 0.2864 0.3349 0.2783 0.056 Uiso 1 1 calc R U . . .
N3 N 0.22585(9) 0.37846(16) 0.41999(8) 0.0539(4) Uani 1 1 d . . . . .
H3A H 0.2169 0.2887 0.4221 0.065 Uiso 1 1 calc R U . . .
O1 O 0.25550(8) 0.64727(12) 0.28994(8) 0.0631(4) Uani 1 1 d . . . . .
O2 O 0.31514(8) 0.55215(15) 0.44735(7) 0.0601(4) Uani 1 1 d . . . . .
O3 O 0.34509(8) 0.31912(15) 0.45828(7) 0.0637(4) Uani 1 1 d . . . . .
 
loop_
 _atom_site_aniso_label
 _atom_site_aniso_U_11
 _atom_site_aniso_U_22
 _atom_site_aniso_U_33
 _atom_site_aniso_U_23
 _atom_site_aniso_U_13
 _atom_site_aniso_U_12
C1 0.0470(8) 0.0464(9) 0.0494(9) 0.0023(7) -0.0021(7) -0.0029(7)
C2 0.0719(13) 0.0897(16) 0.0585(12) 0.0080(11) -0.0129(10) -0.0292(12)
C3 0.0776(15) 0.129(2) 0.0580(13) 0.0168(14) -0.0227(11) -0.0211(15)
C4 0.0904(15) 0.0877(16) 0.0558(12) 0.0241(12) -0.0072(11) 0.0019(14)
C5 0.0938(16) 0.0658(13) 0.0677(13) 0.0221(11) -0.0083(12) -0.0228(12)
C6 0.0465(9) 0.0400(8) 0.0532(9) 0.0055(7) 0.0022(7) -0.0006(7)
C7 0.0555(10) 0.0505(10) 0.0700(12) 0.0021(9) 0.0119(9) 0.0049(8)
C8 0.0506(9) 0.0559(10) 0.0521(10) 0.0095(8) -0.0036(7) 0.0002(8)
C9 0.0483(9) 0.0359(8) 0.0629(10) 0.0012(7) -0.0025(8) 0.0012(7)
C10 0.0451(9) 0.0397(8) 0.0671(11) -0.0015(8) -0.0009(8) 0.0000(7)
C11 0.0462(9) 0.0476(9) 0.0687(11) -0.0111(8) 0.0026(8) 0.0008(8)
C12 0.0524(11) 0.0835(15) 0.0748(14) -0.0094(12) 0.0103(10) 0.0004(10)
C13 0.0522(9) 0.0571(11) 0.0429(9) -0.0072(8) 0.0057(7) -0.0057(8)
C14 0.0573(11) 0.0859(15) 0.0700(13) 0.0001(11) -0.0094(10) -0.0041(10)
C15 0.0873(17) 0.102(2) 0.0726(16) 0.0057(14) -0.0152(13) 0.0080(14)
N1 0.0689(10) 0.0598(10) 0.0590(10) 0.0160(8) -0.0122(8) -0.0200(8)
N2 0.0491(8) 0.0313(7) 0.0605(9) 0.0020(6) 0.0056(6) -0.0014(5)
N3 0.0517(8) 0.0465(8) 0.0636(9) -0.0066(7) 0.0007(7) -0.0029(7)
O1 0.0539(7) 0.0315(6) 0.1040(11) 0.0025(6) 0.0036(7) 0.0011(5)
O2 0.0638(8) 0.0568(8) 0.0597(8) -0.0062(6) -0.0007(6) -0.0099(6)
O3 0.0579(7) 0.0638(8) 0.0694(9) -0.0033(7) -0.0108(6) -0.0013(6)
 
_geom_special_details
;
 All esds (except the esd in the dihedral angle between two l.s. planes)
 are estimated using the full covariance matrix.  The cell esds are taken
 into account individually in the estimation of esds in distances, angles
 and torsion angles; correlations between esds in cell parameters are only
 used when they are defined by crystal symmetry.  An approximate (isotropic)
 treatment of cell esds is used for estimating esds involving l.s. planes.
;
 
loop_
 _geom_bond_atom_site_label_1
 _geom_bond_atom_site_label_2
 _geom_bond_distance
 _geom_bond_site_symmetry_2
 _geom_bond_publ_flag
C1 N1 1.317(2) . ?
C1 C2 1.377(3) . ?
C1 C6 1.536(2) . ?
C2 C3 1.377(3) . ?
C2 H2 0.9300 . ?
C3 C4 1.366(4) . ?
C3 H3 0.9300 . ?
C4 C5 1.356(3) . ?
C4 H4 0.9300 . ?
C5 N1 1.344(3) . ?
C5 H5 0.9300 . ?
C6 N2 1.470(2) . ?
C6 C8 1.523(3) . ?
C6 C7 1.529(2) . ?
C7 H7A 0.9600 . ?
C7 H7B 0.9600 . ?
C7 H7C 0.9600 . ?
C8 H8A 0.9600 . ?
C8 H8B 0.9600 . ?
C8 H8C 0.9600 . ?
C9 O1 1.235(2) . ?
C9 N2 1.333(2) . ?
C9 C10 1.508(2) . ?
C10 C11 1.541(3) . ?
C10 H10A 0.9700 . ?
C10 H10B 0.9700 . ?
C11 N3 1.453(2) . ?
C11 C12 1.525(3) . ?
C11 H11 0.9800 . ?
C12 H12A 0.9600 . ?
C12 H12B 0.9600 . ?
C12 H12C 0.9600 . ?
C13 O2 1.218(2) . ?
C13 N3 1.338(2) . ?
C13 O3 1.348(2) . ?
C14 O3 1.437(2) . ?
C14 C15 1.476(4) . ?
C14 H14A 0.9700 . ?
C14 H14B 0.9700 . ?
C15 H15A 0.9600 . ?
C15 H15B 0.9600 . ?
C15 H15C 0.9600 . ?
N2 H2A 0.8600 . ?
N3 H3A 0.8600 . ?
 
loop_
 _geom_angle_atom_site_label_1
 _geom_angle_atom_site_label_2
 _geom_angle_atom_site_label_3
 _geom_angle
 _geom_angle_site_symmetry_1
 _geom_angle_site_symmetry_3
 _geom_angle_publ_flag
N1 C1 C2 122.11(18) . . ?
N1 C1 C6 117.73(15) . . ?
C2 C1 C6 120.08(17) . . ?
C1 C2 C3 119.0(2) . . ?
C1 C2 H2 120.5 . . ?
C3 C2 H2 120.5 . . ?
C4 C3 C2 119.5(2) . . ?
C4 C3 H3 120.2 . . ?
C2 C3 H3 120.2 . . ?
C5 C4 C3 117.3(2) . . ?
C5 C4 H4 121.3 . . ?
C3 C4 H4 121.3 . . ?
N1 C5 C4 124.5(2) . . ?
N1 C5 H5 117.7 . . ?
C4 C5 H5 117.7 . . ?
N2 C6 C8 110.32(14) . . ?
N2 C6 C7 106.77(13) . . ?
C8 C6 C7 109.40(15) . . ?
N2 C6 C1 108.97(13) . . ?
C8 C6 C1 112.53(14) . . ?
C7 C6 C1 108.68(15) . . ?
C6 C7 H7A 109.5 . . ?
C6 C7 H7B 109.5 . . ?
H7A C7 H7B 109.5 . . ?
C6 C7 H7C 109.5 . . ?
H7A C7 H7C 109.5 . . ?
H7B C7 H7C 109.5 . . ?
C6 C8 H8A 109.5 . . ?
C6 C8 H8B 109.5 . . ?
H8A C8 H8B 109.5 . . ?
C6 C8 H8C 109.5 . . ?
H8A C8 H8C 109.5 . . ?
H8B C8 H8C 109.5 . . ?
O1 C9 N2 122.22(17) . . ?
O1 C9 C10 121.00(16) . . ?
N2 C9 C10 116.77(14) . . ?
C9 C10 C11 111.15(15) . . ?
C9 C10 H10A 109.4 . . ?
C11 C10 H10A 109.4 . . ?
C9 C10 H10B 109.4 . . ?
C11 C10 H10B 109.4 . . ?
H10A C10 H10B 108.0 . . ?
N3 C11 C12 110.04(17) . . ?
N3 C11 C10 110.64(14) . . ?
C12 C11 C10 111.02(16) . . ?
N3 C11 H11 108.3 . . ?
C12 C11 H11 108.3 . . ?
C10 C11 H11 108.3 . . ?
C11 C12 H12A 109.5 . . ?
C11 C12 H12B 109.5 . . ?
H12A C12 H12B 109.5 . . ?
C11 C12 H12C 109.5 . . ?
H12A C12 H12C 109.5 . . ?
H12B C12 H12C 109.5 . . ?
O2 C13 N3 126.12(18) . . ?
O2 C13 O3 123.76(17) . . ?
N3 C13 O3 110.11(16) . . ?
O3 C14 C15 111.8(2) . . ?
O3 C14 H14A 109.2 . . ?
C15 C14 H14A 109.2 . . ?
O3 C14 H14B 109.2 . . ?
C15 C14 H14B 109.2 . . ?
H14A C14 H14B 107.9 . . ?
C14 C15 H15A 109.5 . . ?
C14 C15 H15B 109.5 . . ?
H15A C15 H15B 109.5 . . ?
C14 C15 H15C 109.5 . . ?
H15A C15 H15C 109.5 . . ?
H15B C15 H15C 109.5 . . ?
C1 N1 C5 117.43(17) . . ?
C9 N2 C6 123.61(14) . . ?
C9 N2 H2A 118.2 . . ?
C6 N2 H2A 118.2 . . ?
C13 N3 C11 123.23(16) . . ?
C13 N3 H3A 118.4 . . ?
C11 N3 H3A 118.4 . . ?
C13 O3 C14 117.60(17) . . ?
 
loop_
 _geom_torsion_atom_site_label_1
 _geom_torsion_atom_site_label_2
 _geom_torsion_atom_site_label_3
 _geom_torsion_atom_site_label_4
 _geom_torsion
 _geom_torsion_site_symmetry_1
 _geom_torsion_site_symmetry_2
 _geom_torsion_site_symmetry_3
 _geom_torsion_site_symmetry_4
 _geom_torsion_publ_flag
N1 C1 C2 C3 -1.0(4) . . . . ?
C6 C1 C2 C3 -177.6(2) . . . . ?
C1 C2 C3 C4 -0.7(4) . . . . ?
C2 C3 C4 C5 1.7(4) . . . . ?
C3 C4 C5 N1 -1.1(4) . . . . ?
N1 C1 C6 N2 136.62(17) . . . . ?
C2 C1 C6 N2 -46.6(2) . . . . ?
N1 C1 C6 C8 13.9(2) . . . . ?
C2 C1 C6 C8 -169.26(19) . . . . ?
N1 C1 C6 C7 -107.39(19) . . . . ?
C2 C1 C6 C7 69.4(2) . . . . ?
O1 C9 C10 C11 -77.3(2) . . . . ?
N2 C9 C10 C11 101.28(19) . . . . ?
C9 C10 C11 N3 -64.14(19) . . . . ?
C9 C10 C11 C12 173.38(16) . . . . ?
C2 C1 N1 C5 1.6(3) . . . . ?
C6 C1 N1 C5 178.32(19) . . . . ?
C4 C5 N1 C1 -0.5(4) . . . . ?
O1 C9 N2 C6 0.7(3) . . . . ?
C10 C9 N2 C6 -177.92(16) . . . . ?
C8 C6 N2 C9 66.2(2) . . . . ?
C7 C6 N2 C9 -175.02(17) . . . . ?
C1 C6 N2 C9 -57.8(2) . . . . ?
O2 C13 N3 C11 7.0(3) . . . . ?
O3 C13 N3 C11 -173.94(16) . . . . ?
C12 C11 N3 C13 -135.63(19) . . . . ?
C10 C11 N3 C13 101.31(19) . . . . ?
O2 C13 O3 C14 4.4(3) . . . . ?
N3 C13 O3 C14 -174.66(16) . . . . ?
C15 C14 O3 C13 93.8(2) . . . . ?
 
_refine_diff_density_max    0.254
_refine_diff_density_min   -0.181
_refine_diff_density_rms    0.037

_shelxl_version_number 2014-3

_shelx_res_file
;
TITL 160531HG_0ma_a.res in Pbca  New: Pbca
CELL  1.54178   16.5344    9.4279   20.9981    90.000    90.000    90.000
ZERR  8           0.0008    0.0005    0.0012     0.000     0.000     0.000
LATT 1
SYMM     0.50000 - X ,            - Y ,    0.50000 + Z
SYMM     0.50000 + X ,    0.50000 - Y ,            - Z
SYMM             - X ,    0.50000 + Y ,    0.50000 - Z
SFAC C  H  N  O
UNIT 120 0 32 16
L.S. 4
ACTA
BOND $H
FMAP 2
PLAN 8
CONF
WGHT    0.085400    0.834000
FVAR       0.49673
C1    1    0.368458    0.556447    0.191813    11.00000    0.04698    0.04639 =
         0.04942    0.00225   -0.00210   -0.00287
C2    1    0.314182    0.519514    0.144930    11.00000    0.07191    0.08966 =
         0.05850    0.00800   -0.01289   -0.02922
AFIX  43
H2    2    0.282112    0.439063    0.149307    11.00000   -1.20000
AFIX   0
C3    1    0.308067    0.603432    0.091458    11.00000    0.07756    0.12889 =
         0.05804    0.01675   -0.02267   -0.02107
AFIX  43
H3    2    0.272173    0.579533    0.059092    11.00000   -1.20000
AFIX   0
C4    1    0.355099    0.722037    0.086288    11.00000    0.09045    0.08770 =
         0.05584    0.02407   -0.00721    0.00191
AFIX  43
H4    2    0.351205    0.781889    0.051217    11.00000   -1.20000
AFIX   0
C5    1    0.407673    0.748967    0.134342    11.00000    0.09378    0.06582 =
         0.06775    0.02214   -0.00828   -0.02276
AFIX  43
H5    2    0.440517    0.828650    0.130764    11.00000   -1.20000
AFIX   0
C6    1    0.378815    0.461609    0.250701    11.00000    0.04647    0.03998 =
         0.05316    0.00551    0.00224   -0.00061
C7    1    0.419663    0.323386    0.230327    11.00000    0.05553    0.05050 =
         0.06999    0.00210    0.01194    0.00487
AFIX 137
H7A   2    0.427715    0.264103    0.266953    11.00000   -1.50000
H7B   2    0.470989    0.344262    0.211120    11.00000   -1.50000
H7C   2    0.385934    0.275000    0.200114    11.00000   -1.50000
AFIX   0
C8    1    0.428950    0.532138    0.302639    11.00000    0.05056    0.05589 =
         0.05214    0.00952   -0.00358    0.00025
AFIX 137
H8A   2    0.404049    0.620082    0.314746    11.00000   -1.50000
H8B   2    0.482493    0.550196    0.286927    11.00000   -1.50000
H8C   2    0.431915    0.470599    0.338989    11.00000   -1.50000
AFIX   0
C9    1    0.243257    0.518309    0.293259    11.00000    0.04831    0.03586 =
         0.06287    0.00118   -0.00253    0.00116
C10   1    0.164979    0.460900    0.319564    11.00000    0.04513    0.03968 =
         0.06707   -0.00151   -0.00093    0.00003
AFIX  23
H10A  2    0.158413    0.363033    0.306282    11.00000   -1.20000
H10B  2    0.120088    0.515117    0.302480    11.00000   -1.20000
AFIX   0
C11   1    0.163610    0.468928    0.392843    11.00000    0.04624    0.04762 =
         0.06866   -0.01109    0.00257    0.00076
AFIX  13
H11   2    0.174722    0.567053    0.405516    11.00000   -1.20000
AFIX   0
C12   1    0.080883    0.427105    0.418897    11.00000    0.05238    0.08345 =
         0.07475   -0.00938    0.01032    0.00042
AFIX 137
H12A  2    0.070301    0.329468    0.408949    11.00000   -1.50000
H12B  2    0.040012    0.485736    0.399886    11.00000   -1.50000
H12C  2    0.080261    0.439784    0.464257    11.00000   -1.50000
AFIX   0
C13   1    0.296426    0.427857    0.441834    11.00000    0.05222    0.05711 =
         0.04288   -0.00720    0.00566   -0.00573
C14   1    0.420972    0.352980    0.488031    11.00000    0.05727    0.08595 =
         0.07003    0.00012   -0.00936   -0.00413
AFIX  23
H14A  2    0.438264    0.446408    0.474286    11.00000   -1.20000
H14B  2    0.461556    0.285106    0.474466    11.00000   -1.20000
AFIX   0
C15   1    0.415007    0.350720    0.558154    11.00000    0.08730    0.10206 =
         0.07265    0.00565   -0.01518    0.00800
AFIX 137
H15A  2    0.380066    0.425901    0.572075    11.00000   -1.50000
H15B  2    0.467796    0.363544    0.576297    11.00000   -1.50000
H15C  2    0.393278    0.261245    0.571702    11.00000   -1.50000
AFIX   0
N1    3    0.415599    0.668427    0.186804    11.00000    0.06886    0.05980 =
         0.05900    0.01602   -0.01218   -0.02000
N2    3    0.298461    0.423370    0.275312    11.00000    0.04914    0.03132 =
         0.06050    0.00200    0.00557   -0.00137
AFIX  43
H2A   2    0.286425    0.334875    0.278288    11.00000   -1.20000
AFIX   0
N3    3    0.225846    0.378458    0.419992    11.00000    0.05174    0.04646 =
         0.06355   -0.00663    0.00072   -0.00292
AFIX  43
H3A   2    0.216859    0.288736    0.422121    11.00000   -1.20000
AFIX   0
O1    4    0.255499    0.647274    0.289937    11.00000    0.05385    0.03154 =
         0.10396    0.00254    0.00365    0.00110
O2    4    0.315144    0.552154    0.447352    11.00000    0.06385    0.05679 =
         0.05970   -0.00623   -0.00068   -0.00993
O3    4    0.345094    0.319115    0.458281    11.00000    0.05794    0.06376 =
         0.06937   -0.00326   -0.01084   -0.00129
HKLF 4

REM  160531HG_0ma_a.res in Pbca  New: Pbca
REM R1 =  0.0465 for    2438 Fo > 4sig(Fo)  and  0.0563 for all    2983 data
REM    194 parameters refined using      0 restraints

END

WGHT      0.0713      0.7388

REM Highest difference peak  0.254,  deepest hole -0.181,  1-sigma level  0.037
Q1    1   0.4452  0.2659  0.5234  11.00000  0.05    0.25
Q2    1   0.3158  0.5702  0.1822  11.00000  0.05    0.15
Q3    1   0.4588  0.6200  0.1773  11.00000  0.05    0.15
Q4    1   0.2593  0.4014  0.3924  11.00000  0.05    0.15
Q5    1   0.3717  0.5117  0.2197  11.00000  0.05    0.14
Q6    1   0.4053  0.4212  0.5104  11.00000  0.05    0.14
Q7    1   0.2415  0.2898  0.3894  11.00000  0.05    0.14
Q8    1   0.1221  0.4484  0.3988  11.00000  0.05    0.14
;
_shelx_res_checksum   90350

_shelx_hkl_file
;
   0   1   0    0.10    0.30
   0   3   0   -0.10    0.70
   0   4   0    3.10    1.00
   0   5   0    0.20    1.50
   0  -6   0  179.68    5.80
   0   6   0  213.48    7.10
   0  -7   0    0.20    1.30
   0  -8   0  162.18    4.80
   0  -9   0   -0.40    0.90
   0 -10   0  237.38    5.70
   0 -11   0   -0.50    0.70
   1   0   0    0.00    0.10
   1   0   0   -0.10    0.10
  -1   0   0    0.20    0.20
   1   1   0    0.20    0.30
  -1  -1   0   -0.20    0.30
  -1  -1   0    0.20    0.40
  -1   1   0    0.00    0.20
   1   1   0    0.20    0.30
   1   2   0   -0.20    0.50
  -1  -2   0   -0.40    0.30
  -1  -2   0    0.00    0.60
   1   3   0   -0.50    0.70
  -1   3   0    0.60    0.70
  -1   4   0    0.00    1.00
   1   4   0    0.60    1.00
   1   5   0    3.30    1.70
  -1   5   0    0.40    1.60
  -1  -6   0    0.00    1.50
   1   6   0   -2.20    2.60
  -1  -7   0    1.60    1.20
   1  -7   0    0.40    1.40
   1  -8   0   -0.10    1.10
  -1  -8   0    1.00    1.00
   1  -9   0   -0.20    0.90
  -1  -9   0   -0.20    0.80
   1 -10   0    0.60    0.80
  -1 -10   0    0.20    0.70
  -1 -11   0   -0.20    0.60
   2  -1   0  336.57    7.40
  -2   1   0  332.67    7.50
   2   1   0  343.27    7.50
   2   1   0  332.07    7.50
  -2  -1   0  334.77    7.50
  -2  -1   0  337.77    7.60
  -2  -2   0 4793.02  101.09
   2   2   0 4763.62  101.29
  -2  -2   0 4970.10  101.39
   2   3   0  639.34   14.40
  -2  -3   0  635.84   13.90
  -2  -3   0  658.93   14.60
   2   4   0  174.18    5.00
  -2   4   0  166.38    4.70
   2   5   0 1929.21   41.90
  -2   5   0 1950.20   41.60
  -2  -6   0   30.20    2.70
   2   6   0   42.20    4.90
  -2  -7   0    2.80    1.20
   2  -7   0    2.20    1.60
   2  -8   0   -0.80    1.20
  -2  -8   0   -0.20    1.00
  -2  -9   0  121.09    3.70
   2  -9   0  119.09    3.70
  -2 -10   0    4.40    0.80
  -2 -11   0    3.60    0.60
  -3   0   0   -0.10    0.50
  -3   0   0   -0.20    0.50
   3   0   0    0.50    0.60
   3   0   0    0.50    0.50
  -3   1   0   -0.40    0.50
  -3  -1   0   -0.50    0.60
  -3  -1   0    0.30    0.60
   3   1   0   -0.50    0.60
  -3   1   0   -0.40    0.50
   3  -1   0   -0.20    0.50
   3   1   0    0.80    0.50
  -3   2   0   -0.10    0.60
   3   2   0    0.00    0.80
   3   2   0    1.30    0.80
  -3  -2   0    0.00    0.90
  -3  -2   0   -0.10    0.70
   3  -2   0    0.10    0.60
   3   3   0    0.70    0.90
  -3  -3   0    0.40    1.10
  -3   3   0    0.00    0.60
  -3  -3   0    0.20    0.80
  -3  -4   0    0.80    1.60
  -3  -4   0    0.80    1.00
   3   4   0   -1.70    1.40
  -3   4   0    0.20    1.10
   3   5   0    1.00    1.80
  -3   5   0    1.00    1.70
   3   6   0   -2.20    3.30
  -3  -6   0    0.80    1.40
  -3  -7   0    0.00    1.10
  -3  -8   0    0.70    1.00
  -3  -9   0    1.10    0.80
  -3 -10   0   -0.10    0.60
  -3 -11   0    0.50    0.50
   4   0   0 5070.59  106.59
  -4   0   0 4931.91  106.39
  -4   0   0 5255.47  106.69
   4   1   0  391.46    9.00
  -4   1   0  396.46    8.90
   4   1   0  397.96    9.20
  -4  -1   0  398.26    9.20
   4  -1   0  387.36    9.10
  -4  -1   0  390.06    9.30
  -4   1   0  392.26    9.20
   4   2   0  185.78    5.00
  -4  -2   0  186.88    5.20
  -4   2   0  190.78    5.00
  -4   2   0  188.98    4.70
   4  -2   0  195.28    4.90
   4   2   0  194.08    5.10
  -4  -2   0  192.78    5.20
   4   3   0  210.28    5.70
  -4   3   0  208.68    5.30
  -4  -3   0  209.08    5.60
  -4  -3   0  207.58    5.90
  -4   3   0  202.68    5.20
  -4   4   0 1593.84   33.00
  -4  -4   0 1521.85   33.60
  -4  -4   0 1572.04   34.50
   4   4   0 1565.64   34.10
  -4   5   0   10.70    2.20
   4   5   0   13.80    2.30
  -4  -6   0    1.30    1.30
  -4  -7   0   47.70    2.90
  -4  -8   0  207.18    5.80
  -4  -9   0  146.89    4.20
  -4 -10   0   17.30    1.20
  -4 -11   0   27.00    1.10
   5   0   0    0.00    0.70
  -5   0   0    1.00    1.00
  -5   0   0    0.50    0.90
   5   0   0    0.30    0.80
  -5  -1   0    0.60    1.00
   5   1   0   -0.30    0.90
  -5   1   0    0.70    0.80
  -5   1   0   -1.00    0.90
  -5  -1   0    0.20    1.00
   5  -1   0    0.90    0.80
   5   1   0    0.20    0.80
   5   2   0   -0.10    0.90
  -5  -2   0   -0.40    1.20
  -5   2   0    0.60    0.90
  -5   2   0   -1.30    1.00
  -5  -2   0    3.40    1.20
   5   2   0    0.00    0.90
   5  -2   0    0.50    0.80
  -5   3   0    1.10    1.10
  -5  -3   0    1.10    1.50
  -5  -3   0   -1.40    1.60
  -5   3   0    0.00    1.10
   5   3   0   -0.60    1.20
  -5  -4   0   -1.30    2.00
  -5   4   0    0.90    1.20
  -5   4   0    1.10    1.80
  -5  -4   0    2.30    2.20
   5   4   0   -0.40    1.50
  -5  -5   0    0.50    1.70
   5   5   0    2.20    2.40
  -5  -6   0    1.20    1.10
  -5  -7   0    0.20    1.00
  -5  -8   0   -0.20    0.90
  -5  -9   0   -0.50    0.70
  -5 -10   0    0.80    0.60
  -6   0   0 2453.35   50.59
   6   0   0 2231.58   49.90
   6   0   0 2355.16   50.39
  -6   0   0 2372.66   50.09
   6  -1   0    1.20    1.00
  -6  -1   0    1.00    1.40
  -6  -1   0    2.30    1.20
   6   1   0    1.90    1.20
  -6   1   0    1.00    1.10
  -6   1   0    0.40    1.40
   6   1   0    1.60    0.90
   6   2   0 1439.76   31.30
  -6   2   0 1446.56   31.40
  -6  -2   0 1436.96   31.50
  -6   2   0 1431.56   31.30
   6   2   0 1422.86   31.10
   6  -2   0 1414.76   31.10
  -6  -2   0 1412.16   31.40
  -6   3   0   74.29    3.70
  -6   3   0   79.89    3.20
  -6  -3   0   74.29    4.40
  -6  -3   0   82.49    4.70
   6   3   0   77.79    3.40
  -6   4   0  944.71   20.90
   6   4   0  931.31   21.50
  -6  -5   0  134.99    4.60
  -6  -6   0  265.97    7.10
  -6  -7   0   34.60    2.30
  -6  -8   0  137.49    4.20
  -6  -9   0   71.69    2.50
  -6 -10   0   10.90    1.00
   7   0   0   -0.80    1.00
  -7   0   0    1.60    1.40
   7   0   0   -0.80    1.20
  -7   0   0   -1.10    1.50
   7   1   0    1.50    1.30
  -7   1   0    0.30    1.70
  -7   1   0    1.40    1.30
   7   1   0    0.30    1.10
  -7  -1   0   -1.30    1.50
  -7  -1   0   -2.10    1.70
   7  -1   0    1.70    1.20
  -7  -2   0   -2.40    2.00
   7  -2   0   -2.40    1.30
  -7   2   0    1.70    1.90
   7   2   0   -0.10    1.20
  -7   2   0    0.70    1.50
   7   2   0    0.40    1.40
   7   3   0   -2.10    1.50
  -7   3   0    1.80    1.80
  -7   3   0   -1.40    2.20
   7   4   0    2.90    2.30
  -7  -5   0    0.70    1.40
  -7  -6   0   -0.20    1.10
  -7  -7   0   -0.60    1.00
  -7  -8   0   -0.10    0.80
  -7  -9   0    0.00    0.70
  -7 -10   0    0.30    0.50
  -8   0   0 1714.13   38.10
   8   0   0 1805.52   37.90
  -8   0   0 1688.33   38.80
   8   0   0 1767.32   38.30
   8  -1   0  114.49    4.60
  -8  -1   0  112.69    5.10
   8   1   0  120.29    4.70
  -8   1   0  111.39    4.60
   8   1   0  113.09    4.10
  -8   1   0  111.09    5.80
   8   2   0  477.75   11.90
  -8   2   0  464.75   11.80
   8   2   0  491.25   12.20
  -8   2   0  478.75   12.90
  -8   3   0  233.68    7.30
   8   3   0  233.88    7.30
  -8  -4   0   12.40    2.80
   8   5   0  376.86    9.90
  -8  -5   0  395.06    9.60
  -8  -6   0   61.49    2.90
  -8  -7   0   78.69    3.00
  -8  -8   0   80.99    2.90
  -8  -9   0    2.90    0.70
  -8 -10   0    1.50    0.50
   9   0   0    1.80    2.00
   9   0   0   -1.20    1.60
  -9   0   0    3.10    3.40
   9  -1   0    1.90    2.00
   9   1   0    0.80    1.80
  -9   1   0    1.40    2.80
   9   1   0   -2.50    1.90
  -9   1   0    3.60    4.20
   9   2   0   -4.20    2.10
  -9   2   0   -1.00    3.20
   9   3   0   -0.50    1.90
  -9  -4   0   -2.20    1.80
   9   4   0    2.10    1.80
   9   5   0   -1.10    1.70
  -9  -5   0    0.10    1.30
  -9  -6   0   -1.20    1.10
   9   6   0   -0.10    1.80
  -9  -7   0    0.70    0.90
  -9  -8   0    0.60    0.70
  -9  -9   0    0.00    0.60
  -9 -10   0    0.20    0.40
  10   1   0   23.80    2.90
 -10   1   0   36.60    3.60
  10   2   0   44.00    3.00
 -10  -2   0   45.50    2.90
 -10   2   0   38.90    3.00
  10   3   0  226.38    6.30
 -10  -3   0  222.48    6.40
 -10   3   0  224.78    6.30
  10   4   0   49.70    3.00
 -10   4   0   52.09    3.50
 -10  -4   0   45.20    3.40
 -10  -5   0  762.42   18.70
  10   5   0  822.22   19.20
 -10  -6   0  329.17    8.20
  10   6   0  326.17    8.20
  10   7   0  136.09    4.40
 -10  -7   0  141.99    4.10
 -10  -8   0   42.00    1.90
 -10  -9   0   26.70    1.30
 -11   0   0   -1.80    1.30
  11   0   0    0.20    1.30
  11   1   0    0.50    1.40
 -11   1   0    0.50    1.30
  11  -1   0    3.20    1.70
 -11  -1   0   -0.50    1.30
 -11   2   0   -0.30    1.40
  11   2   0   -0.50    1.30
 -11  -2   0   -3.10    1.20
  11   3   0   -0.30    1.30
 -11   3   0   -1.00    1.40
 -11  -3   0    0.00    1.70
 -11   4   0   -0.30    1.50
 -11  -4   0    2.40    2.20
 -11   5   0   -0.60    1.60
  11   5   0   -0.30    1.20
 -11  -6   0    1.50    1.00
  11   6   0    0.70    1.30
 -11  -7   0   -1.10    0.80
  11   7   0    3.30    1.30
 -11  -8   0   -0.10    0.60
 -11  -9   0   -0.30    0.50
 -12   0   0  973.20   21.70
  12   0   0  997.80   21.80
  12  -1   0    2.30    1.60
 -12  -1   0    5.00    1.20
  12   1   0    4.90    1.30
 -12   1   0    3.50    1.30
  12   2   0   38.70    2.50
 -12   2   0   37.90    2.50
 -12  -2   0   37.90    2.40
  12   3   0   37.30    2.50
 -12  -3   0   35.60    2.80
 -12   4   0   -0.10    1.20
  12   4   0    0.80    1.20
 -12   5   0   -0.60    1.40
 -12  -5   0    0.40    1.30
  12   5   0    0.30    1.20
  12   6   0  383.46    9.40
 -12  -6   0  407.56    9.30
  12   7   0   16.70    1.80
 -12  -7   0   17.20    1.50
  12   8   0   14.80    1.80
 -12  -8   0   14.20    1.10
 -12  -9   0    1.70    0.50
 -13   0   0   -1.00    1.10
  13   0   0   -0.50    1.40
  13   1   0    1.20    1.10
  13  -1   0    0.40    1.50
 -13  -1   0   -1.40    1.00
 -13   1   0    1.30    1.10
 -13  -2   0    0.90    1.10
  13   2   0   -0.90    1.00
 -13   2   0    1.20    1.10
 -13   3   0   -0.20    1.00
 -13  -3   0    0.80    1.40
  13   3   0   -1.00    1.00
 -13   4   0    0.10    1.10
  13   4   0    0.20    1.00
 -13   5   0   -0.10    1.10
  13   5   0    0.40    1.00
 -13  -6   0   -1.80    1.10
 -13   6   0    2.60    1.30
  13   6   0   -1.30    0.90
 -13  -7   0   -0.50    0.70
  13   7   0   -0.40    0.90
  14   0   0   48.70    2.60
 -14   0   0   54.19    2.50
  14  -1   0   14.10    1.60
  14   1   0   15.90    2.00
 -14  -1   0   14.00    1.80
 -14   1   0   15.30    1.80
 -14   2   0   51.89    2.50
  14   2   0   53.99    2.60
 -14  -2   0   54.09    2.50
 -14   3   0   63.39    2.70
 -14  -3   0   62.19    2.90
  14   3   0   66.99    2.80
 -14   4   0   54.59    2.50
  14   4   0   54.29    2.50
  14   5   0   57.49    2.40
 -14   5   0   57.69    2.40
 -14   6   0   11.90    1.30
  14   6   0   11.90    1.40
  14   7   0    1.50    0.80
  15   0   0    0.50    1.10
 -15   0   0    0.80    0.90
 -15   1   0    0.60    0.90
 -15  -1   0    1.00    0.90
  15   1   0    1.80    1.10
  15  -1   0   -0.10    1.20
 -15   2   0    0.50    0.90
 -15  -2   0   -0.20    1.00
  15   2   0   -1.90    0.90
  15   3   0    0.20    1.00
 -15   3   0    1.30    0.90
 -15  -3   0    0.00    1.30
 -15   4   0   -0.10    0.90
  15   4   0   -0.50    0.90
 -15   5   0    1.60    0.90
  15   5   0    0.40    0.90
 -15   6   0    0.80    0.90
  15   6   0   -0.90    0.70
  15   7   0    0.50    0.60
  16   0   0    7.80    1.20
 -16   0   0    7.80    1.10
 -16   1   0   28.50    1.80
  16   1   0   29.60    1.90
 -16  -1   0   29.00    1.80
  16  -1   0   26.80    2.10
 -16  -2   0  174.88    4.60
 -16   2   0  170.98    4.70
  16   2   0  169.48    4.70
  16   3   0   21.20    1.70
 -16   3   0   21.70    1.60
  16   4   0    7.10    1.00
 -16   4   0    7.30    1.00
  16   5   0   17.50    1.30
 -16   5   0   17.70    1.30
 -16   6   0    0.20    1.30
  16   6   0    0.40    0.60
 -17   0   0    0.20    0.80
  17   0   0   -0.10    0.90
 -17  -1   0    0.40    0.80
  17   1   0    0.60    0.90
 -17   1   0    1.40    0.80
 -17   2   0   -0.50    0.70
  17   2   0   -0.40    0.80
 -17  -2   0    0.50    0.80
  17   3   0    0.60    0.70
 -17   3   0    0.30    0.70
  17   4   0   -0.70    0.60
 -17   4   0   -0.30    0.60
 -17   5   0    0.10    0.60
  17   5   0   -0.90    0.50
 -18   0   0  127.79    3.40
  18   1   0   14.90    1.20
 -18   1   0   13.30    1.20
 -18  -1   0   13.70    1.20
 -18  -2   0    0.40    0.90
 -18   2   0    2.80    0.70
  18   2   0    0.70    0.70
 -18   3   0   43.40    1.70
  18   3   0   40.20    1.60
 -18   4   0   19.50    1.10
  18   4   0   18.40    1.00
 -19   0   0   -0.80    0.60
 -19  -1   0    0.00    0.60
 -19   1   0   -0.10    0.50
 -19   2   0    0.10    0.50
 -19   3   0    0.50    0.50
   0   1  -1    0.20    0.20
   0   1  -1   -0.10    0.30
   0   1   1    0.30    0.20
   0  -1  -1    0.40    0.20
   0   2  -1    6.60    0.80
   0   2   1    8.60    1.00
   0  -2   1    7.60    0.50
   0  -2   1    7.10    0.60
   0   3   1    0.70    0.70
   0   3  -1   -0.20    0.60
   0   4  -1  272.67    6.70
   0   4   1  275.77    7.00
   0   5   1    2.80    1.70
   0   5  -1   -1.20    1.40
   0  -6   1   59.59    3.30
   0   6   1   71.89    4.90
   0  -6  -1   64.19    3.70
   0  -7  -1   -0.70    1.30
   0  -7   1    0.10    1.20
   0  -8  -1  105.09    3.70
   0  -8   1  104.09    3.60
   0  -9  -1   -1.00    0.90
   0  -9   1   -0.80    0.80
   0 -10  -1   26.60    1.50
   0 -10   1   24.40    1.40
   1   0   1   -0.10    0.20
   1   0   1    0.30    0.20
  -1   0  -1    0.20    0.20
  -1   0  -1    0.10    0.20
  -1   0   1    0.50    0.20
   1   1   1    0.60    0.30
  -1   1  -1    0.10    0.30
  -1  -1   1    0.10    0.40
   1   1   1    0.50    0.40
  -1  -1   1    0.00    0.40
   1   1  -1    0.60    0.30
  -1  -1  -1    0.70    0.50
  -1  -3   1  726.73   15.30
   1   3   1  722.83   16.10
  -1   3  -1  725.93   15.70
   1   3  -1  722.73   15.80
  -1   3   1  711.53   15.90
   1   4   1   19.70    2.00
  -1   4  -1   20.50    1.60
  -1   4   1   21.50    1.90
   1   4  -1   19.70    1.80
   1   5   1    0.40    1.60
  -1   5  -1    1.30    1.40
   1   5  -1    1.60    1.50
  -1   5   1    0.00    1.70
   1   6   1    5.10    3.10
  -1  -6  -1    0.20    1.60
  -1   6   1    4.90    2.80
   1  -7  -1   16.00    2.50
  -1  -7   1   21.20    2.20
  -1  -7  -1   16.90    2.20
   1  -7   1   23.10    2.40
   1  -8  -1    5.10    1.30
  -1  -8   1    4.70    1.10
   1  -8   1    3.60    1.20
  -1  -8  -1    5.10    1.20
  -1  -9   1    5.50    1.00
   1  -9  -1    6.90    1.20
  -1  -9  -1    6.30    1.10
   1  -9   1    9.80    1.60
   1 -10  -1   -0.50    0.80
  -1 -10   1    0.20    0.70
   1 -10   1   -0.50    0.80
  -1 -10  -1    0.00    0.70
  -1 -11   1    0.40    0.60
  -1 -11  -1   -0.60    0.60
   2   0  -1    0.40    0.40
   2   0   1    0.00    0.30
   2   0   1    0.40    0.40
  -2   0   1    0.20    0.40
  -2   0  -1    0.30    0.50
  -2   0   1    0.00    0.50
  -2   0  -1    1.50    0.40
  -2  -1   1 4803.02  100.29
  -2  -2   1    8.00    0.90
   2   2   1    6.20    0.90
  -2  -2   1    5.70    0.70
  -2   2  -1    6.30    0.90
   2   2   1    6.10    0.70
  -2  -2  -1    6.70    1.00
   2   2  -1    4.30    0.70
  -2  -2  -1    8.20    1.00
  -2   2   1    6.60    0.90
   2   3   1  190.68    4.60
  -2  -3   1  183.98    4.60
  -2   3  -1  184.28    4.60
  -2   3  -1  187.98    4.30
   2   3   1  186.48    5.10
  -2  -3   1  197.38    5.10
  -2  -3  -1  186.98    4.50
   2   3  -1  189.28    4.90
  -2   4  -1  370.86    8.60
   2   4   1  364.36    9.20
   2   4  -1  378.76    9.00
  -2   4   1  375.66    9.00
   2   5   1  137.69    5.00
  -2   5  -1  151.08    4.50
   2   5  -1  138.19    4.90
  -2  -6   1   17.20    2.40
   2   6   1   20.50    3.40
  -2  -6  -1   19.20    2.70
   2   6  -1   22.80    3.50
   2  -7  -1   59.89    3.30
  -2  -7   1   62.09    2.90
  -2  -7  -1   65.09    3.00
   2  -7   1   53.79    3.10
  -2  -8   1   69.29    2.90
   2  -8  -1   64.69    2.90
  -2  -8  -1   65.09    2.90
   2  -8   1   67.19    2.90
  -2  -9   1   77.49    2.80
   2  -9  -1   70.89    2.80
   2  -9   1   74.79    2.80
  -2  -9  -1   76.39    2.90
  -2 -10   1    9.30    1.10
  -2 -10  -1    8.50    1.20
  -2 -11   1    1.20    0.60
  -2 -11  -1    2.50    0.60
  -3   0   1    0.70    0.60
   3   0   1    0.40    0.40
   3   0  -1   -0.10    0.60
  -3   0  -1   -0.40    0.50
  -3   0   1    0.30    0.50
   3   0   1   -0.20    0.60
   3   0  -1    1.00    0.50
  -3   0  -1    0.50    0.50
  -3  -1   1  242.28    5.80
  -3   1  -1  244.68    5.50
  -3   1  -1  244.78    5.90
  -3  -1   1  248.68    6.00
   3   1   1  235.68    5.80
   3   1   1  242.78    5.90
   3   1  -1  240.68    5.80
  -3  -1  -1  243.88    5.90
   3  -1   1  241.38    5.80
   3   1  -1  249.08    5.90
  -3  -1  -1  244.68    5.90
  -3   1   1  244.28    5.90
  -3   1   1  255.77    5.80
  -3   2  -1 1261.27   26.00
   3   2   1 1224.18   26.30
  -3   2  -1 1222.68   26.20
   3   2   1 1207.78   26.50
  -3  -2   1 1216.08   26.40
  -3  -2   1 1202.68   26.50
  -3  -2  -1 1200.38   26.30
   3  -2   1 1251.37   26.20
   3   2  -1 1225.18   26.40
  -3   2   1 1240.98   26.20
  -3  -2  -1 1245.88   26.60
   3   3   1  287.77    6.80
  -3  -3   1  279.97    6.80
   3   3   1  279.47    7.20
  -3   3  -1  285.07    6.50
   3   3  -1  286.67    7.00
  -3   3   1  275.57    6.40
   3  -3   1  279.27    6.40
  -3  -3  -1  282.27    6.80
  -3  -3  -1  287.57    7.40
  -3  -4   1  153.38    4.20
  -3   4  -1  154.98    4.20
  -3  -4   1  159.28    5.10
   3   4   1  156.18    4.90
  -3  -4   1  150.08    4.20
  -3  -4  -1  157.68    4.20
   3   4  -1  148.09    4.70
   3   5   1    0.40    1.90
  -3   5  -1    2.50    1.50
   3   5  -1    3.60    1.80
  -3  -6   1   34.90    2.50
  -3  -6  -1   37.00    2.80
   3   6  -1   40.80    5.40
  -3  -7   1   48.40    2.70
   3  -7  -1   48.40    4.20
  -3  -7  -1   47.60    2.60
  -3  -8   1   53.39    2.50
   3  -8  -1   47.70    3.10
  -3  -8  -1   48.30    2.50
  -3  -9   1   45.20    2.10
  -3  -9  -1   45.60    2.20
  -3 -10   1    3.30    0.70
  -3 -10  -1    3.90    0.80
  -3 -11   1    5.90    0.70
  -3 -11  -1    6.90    0.80
   4   0  -1    2.40    0.80
   4   0  -1   -0.40    0.80
  -4   0  -1   -0.80    0.70
  -4   0   1    0.30    0.70
  -4   0   1   -0.80    0.80
   4   0   1   -1.30    0.70
   4   0   1   -0.40    0.60
  -4   0  -1    1.20    0.70
  -4   1  -1    9.90    1.10
  -4   1  -1    7.80    1.00
   4   1   1   10.30    1.20
  -4  -1   1    8.20    1.20
   4  -1  -1    6.70    0.90
   4   1   1   12.00    1.60
  -4  -1   1    8.50    1.00
   4  -1   1   10.00    1.40
   4  -1   1    9.90    1.10
  -4   1   1    9.60    1.30
   4   1  -1    8.40    1.10
   4   1  -1   10.30    1.30
  -4  -1  -1   10.30    1.40
  -4  -1  -1    8.30    1.20
  -4   1   1   10.00    1.10
   4   2   1  150.98    4.30
   4   2   1  151.98    4.30
  -4  -2   1  153.38    4.40
  -4   2  -1  157.38    3.80
  -4  -2   1  148.89    4.40
  -4   2  -1  149.79    4.20
   4   2  -1  151.78    4.20
  -4   2   1  153.98    4.10
  -4   2   1  150.58    4.20
  -4  -2  -1  144.69    4.40
  -4  -2  -1  146.19    4.90
   4  -2   1  154.78    4.10
   4   3   1   38.60    2.20
   4   3   1   35.00    2.30
  -4   3  -1   34.10    1.90
  -4   3  -1   39.50    1.70
  -4  -3   1   32.00    2.30
  -4  -3   1   37.10    2.60
   4   3  -1   33.60    2.10
  -4  -3  -1   38.70    2.30
  -4  -3  -1   40.00    2.80
  -4   3   1   35.80    1.90
   4  -3   1   34.90    1.80
  -4   4  -1    9.00    1.30
  -4  -4   1   10.20    2.20
  -4  -4   1    7.80    1.60
  -4   4  -1    7.20    1.30
   4   4   1    9.00    1.60
  -4   4  -1    9.00    1.30
  -4   4   1    9.90    1.40
   4   4  -1    8.70    1.60
  -4  -4  -1    6.00    1.60
  -4   4   1    9.10    0.90
  -4  -4  -1    6.70    2.10
  -4   5  -1  560.24   12.80
   4   5   1  541.85   13.80
  -4   5   1  579.64   13.60
   4   5  -1  537.25   13.50
  -4  -6   1   15.50    2.10
  -4  -6  -1   14.00    1.70
  -4  -7   1  134.29    4.50
  -4  -7  -1  133.89    4.50
  -4  -8   1  205.78    5.70
  -4  -8  -1  211.38    5.80
  -4  -9   1    2.00    0.80
  -4  -9  -1    1.40    0.80
  -4 -10   1   44.60    1.80
  -4 -10  -1   43.50    1.80
  -4 -11   1    7.00    0.70
  -4 -11  -1    5.20    0.70
   5   0   1    0.80    0.90
  -5   0  -1   -1.00    1.40
  -5   0  -1    0.80    0.80
   5   0  -1    0.60    0.80
  -5   0   1    0.50    0.80
   5   0  -1    0.80    0.70
  -5   0   1   -0.90    1.10
   5   0   1   -0.40    0.70
  -5   1  -1    7.90    1.00
  -5  -1   1    9.90    1.50
   5   1   1   10.80    1.30
  -5  -1   1    8.80    1.40
   5   1   1   13.70    1.50
  -5   1  -1   10.00    1.30
   5  -1  -1    8.60    1.10
   5  -1   1    9.70    1.20
  -5  -1  -1    9.00    1.20
  -5  -1  -1    8.00    1.30
   5   1  -1   12.80    1.80
  -5   1   1   11.50    1.40
  -5   1   1   10.50    1.40
   5   1  -1   10.50    1.40
   5  -1   1   10.30    1.30
  -5  -2   1   32.30    2.30
  -5   2  -1   30.50    2.20
  -5   2  -1   30.40    1.60
  -5  -2   1   31.20    2.40
   5   2   1   29.00    2.10
   5   2   1   32.20    2.00
  -5   2   1   31.40    1.90
   5   2  -1   31.20    2.00
  -5  -2  -1   29.70    2.40
  -5  -2  -1   30.80    2.40
   5  -2   1   32.80    2.00
  -5   2   1   28.00    2.20
  -5   3  -1  151.28    4.50
  -5  -3   1  156.08    5.20
  -5  -3   1  146.79    5.00
   5   3   1  153.28    4.80
   5   3   1  150.28    4.60
  -5   3  -1  152.28    4.10
  -5  -3  -1  151.68    5.00
  -5   3   1  146.99    5.00
  -5   3   1  151.28    4.50
   5   3  -1  153.58    4.70
  -5  -3  -1  146.79    5.20
  -5   4  -1   89.99    3.40
  -5  -4   1   90.99    5.00
  -5  -4   1  101.19    6.40
   5   4   1  100.09    4.10
  -5   4  -1   95.69    3.30
  -5   4   1   98.79    3.40
  -5  -4  -1   93.59    5.00
  -5  -4  -1   85.69    5.20
  -5   4   1   95.09    4.00
   5   4  -1   95.59    3.90
   5   5   1    0.50    2.70
  -5  -5   1    2.10    1.60
  -5   5   1    4.80    2.70
  -5  -5  -1   -0.70    1.60
   5   5  -1   -1.00    2.30
  -5  -6   1  202.48    5.90
  -5  -6  -1  215.08    6.10
  -5  -7   1  261.27    6.80
  -5  -7  -1  248.78    6.80
  -5  -8   1   22.50    1.80
  -5  -8  -1   22.30    1.90
  -5  -9   1   50.59    2.20
  -5  -9  -1   51.09    2.30
  -5 -10   1    1.10    0.60
  -5 -10  -1    0.80    0.60
  -6   0  -1    2.20    1.40
   6   0   1   -1.30    1.00
  -6   0  -1    1.40    1.20
   6   0  -1    0.30    1.10
   6   0  -1    0.00    0.90
  -6   0   1    1.00    1.00
   6   0   1    0.80    0.90
  -6   0   1    0.70    1.40
   6   1   1  230.58    5.90
  -6  -1   1  228.48    6.20
   6   1   1  222.88    6.30
   6  -1  -1  226.28    6.10
  -6  -1   1  219.48    6.50
  -6   1  -1  221.58    6.40
  -6   1  -1  222.98    5.80
   6   1  -1  223.98    6.30
   6   1  -1  224.68    5.90
  -6   1   1  215.28    6.40
  -6   1   1  228.68    6.00
  -6  -1  -1  226.68    6.20
   6  -1   1  225.08    6.10
   6  -1   1  219.18    5.70
  -6  -1  -1  216.98    6.50
   6   2   1  537.15   12.70
  -6   2  -1  540.05   12.70
  -6  -2   1  524.05   12.80
  -6   2  -1  540.25   12.10
  -6  -2   1  531.25   13.00
   6   2   1  541.95   12.60
   6   2  -1  527.95   12.50
  -6  -2  -1  518.05   12.90
  -6   2   1  537.05   12.80
   6  -2   1  526.25   12.50
  -6  -2  -1  538.35   12.90
  -6   2   1  532.95   12.30
   6   3   1    3.90    1.50
  -6   3  -1    6.00    1.30
   6   3   1    4.10    1.40
  -6  -3   1    6.80    2.10
  -6   3  -1    8.70    1.70
   6  -3   1    4.90    1.30
  -6   3   1    3.30    1.60
   6   3  -1    6.10    1.50
  -6  -3  -1    6.30    3.40
  -6   3   1    6.10    1.60
  -6  -3  -1    2.60    2.10
  -6   4  -1    5.80    1.80
   6   4   1    5.60    2.20
  -6   4   1    6.70    2.20
   6   4  -1    5.40    1.80
  -6  -5   1   71.89    3.30
  -6  -5  -1   74.79    3.60
  -6  -6   1    5.70    1.30
  -6  -6  -1    6.60    1.40
  -6  -7   1    6.00    1.20
  -6  -7  -1    5.60    1.20
  -6  -8   1  221.58    5.90
  -6  -8  -1  225.18    6.10
  -6  -9   1    1.90    0.80
  -6  -9  -1    0.30    0.70
  -6 -10   1   31.00    1.40
  -6 -10  -1   30.80    1.40
   7   0  -1   -1.10    1.20
   7   0   1    0.20    1.30
  -7   0  -1   -0.40    1.30
  -7   0  -1    0.00    1.60
   7   0  -1    1.40    1.20
  -7   0   1    1.00    1.40
   7   0   1   -0.40    1.00
  -7   0   1    1.20    1.80
  -7   1  -1   71.59    4.00
   7   1   1   66.99    3.30
  -7  -1   1   61.99    3.40
  -7   1  -1   63.39    3.00
  -7  -1   1   60.59    4.10
   7   1   1   59.09    2.80
  -7  -1  -1   59.79    3.40
   7   1  -1   59.49    2.90
   7  -1   1   60.79    3.20
   7   1  -1   58.89    3.20
  -7  -1  -1   57.99    4.00
  -7   1   1   59.09    3.90
  -7   1   1   64.39    3.20
  -7   2  -1   -1.20    1.30
  -7  -2   1    1.60    1.90
  -7   2  -1    0.50    1.90
   7   2   1    0.60    1.50
   7   2   1   -1.60    1.20
  -7  -2  -1    1.40    1.90
  -7   2   1    3.80    1.60
   7  -2   1    0.40    1.30
  -7   2   1    2.80    1.90
   7   2  -1   -1.00    1.30
  -7   3  -1  302.57    7.70
   7   3   1  295.17    8.10
   7   3   1  288.77    8.10
  -7   3  -1  284.87    8.60
   7  -3   1  290.17    7.90
  -7   3   1  295.87    8.60
   7   3  -1  292.67    8.10
  -7   3   1  294.47    7.90
   7   4   1   16.20    2.60
   7   4  -1   22.90    2.70
  -7   4   1   20.60    3.20
  -7  -5   1   -0.40    1.30
  -7  -5  -1    2.40    1.50
  -7  -6   1   12.50    2.00
  -7  -6  -1   13.40    1.60
  -7  -7   1    5.40    1.20
  -7  -7  -1    4.60    1.10
  -7  -8   1    2.40    0.90
  -7  -8  -1    1.70    0.90
  -7  -9   1   13.00    1.20
  -7  -9  -1   11.70    1.30
  -7 -10   1    1.90    0.60
  -7 -10  -1    1.50    0.60
  -8   0  -1    1.40    1.90
  -8   0   1   -0.60    2.70
   8   0  -1   -0.30    1.30
   8   0   1   -1.70    1.30
  -8   0  -1    4.00    2.50
   8   0   1   -1.00    1.50
  -8   0   1    2.50    2.00
   8   1   1  575.34   14.10
  -8   1  -1  580.04   13.80
  -8  -1   1  596.84   14.40
   8   1   1  583.04   13.60
  -8   1  -1  561.44   14.70
   8   1  -1  588.44   13.70
  -8   1   1  565.44   14.70
  -8   1   1  552.34   13.90
  -8  -1  -1  574.44   14.20
   8  -1   1  574.54   14.00
  -8   2  -1  296.97    8.20
  -8   2  -1  303.47    9.60
   8   2   1  302.07    8.20
   8   2   1  302.57    8.60
   8  -2   1  304.77    8.40
  -8   2   1  302.87    9.50
   8   2  -1  298.67    8.20
  -8   2   1  296.27    8.50
  -8   3  -1    4.80    2.60
   8   3   1    3.90    2.00
   8   3   1    4.20    2.20
   8   3  -1   -1.90    2.10
  -8   3   1    0.60    2.80
  -8  -4   1   -3.10    1.70
  -8  -4  -1    1.00    2.10
   8   5   1   13.30    2.50
  -8  -5   1   12.60    1.70
   8   5  -1   14.90    2.30
  -8  -5  -1   15.00    1.90
  -8  -6   1    2.30    1.20
  -8  -6  -1    1.90    1.20
  -8  -7   1    3.40    1.00
  -8  -7  -1    3.20    1.10
  -8  -8   1    0.00    0.70
  -8  -8  -1    0.00    0.80
  -8  -9   1   56.59    2.10
  -8  -9  -1   53.99    2.10
  -8 -10   1   17.10    1.00
  -8 -10  -1   17.60    1.00
   9   0   1    1.40    1.90
  -9   0  -1    2.50    2.80
   9   0   1   -1.80    1.70
   9   1   1    6.60    2.00
   9   1   1    6.20    1.90
  -9   1  -1    2.40    2.70
   9   1  -1    5.40    2.00
   9  -1   1    6.30    2.10
  -9   1   1   15.00    6.80
  -9   1   1    4.00    3.10
   9   2   1  246.78    8.00
  -9   2  -1  240.38    8.10
   9   2   1  233.48    7.50
  -9   2   1  299.07   12.40
   9  -2   1  246.98    7.90
   9   2  -1  236.08    7.60
   9   3   1  221.48    6.40
   9   3  -1  211.68    6.30
  -9  -4   1    3.80    1.70
   9   4   1    2.80    1.80
   9   4  -1    5.90    1.90
  -9  -4  -1    6.00    1.90
  -9  -5   1   -1.10    1.30
   9   5   1   -0.60    1.80
   9   5  -1    1.20    1.70
  -9  -5  -1    1.70    1.40
   9   6   1   77.69    3.70
  -9  -6   1   73.59    3.00
  -9  -6  -1   72.89    3.10
   9   6  -1   67.79    3.80
  -9  -7   1    3.30    1.00
  -9  -7  -1    3.10    1.00
  -9  -8   1    0.40    0.80
  -9  -8  -1   -0.10    0.70
  -9  -9   1    0.40    0.60
  -9  -9  -1    0.40    0.60
  -9 -10   1    1.60    0.40
  -9 -10  -1    2.30    0.50
  10   0   1    2.20    2.40
  10   0   1    0.20    2.50
 -10   0  -1    4.20    2.40
 -10   1  -1    9.60    1.80
  10   1   1    6.90    3.00
 -10  -1   1   13.20    1.90
  10   1   1    9.50    2.90
  10   1   1    7.50    1.80
  10   1  -1    5.20    1.60
  10  -1   1   10.90    2.70
 -10   1   1   10.00    1.80
 -10  -1  -1   11.70    1.90
  10   2   1  110.99    6.30
  10   2   1  108.69    4.10
 -10  -2   1   95.39    3.80
 -10   2   1   96.79    4.00
 -10  -2  -1  101.49    3.90
  10   2  -1  101.59    3.90
  10   3   1   96.69    3.90
 -10  -3   1   93.69    4.10
 -10   3   1   93.09    3.90
  10   3  -1   94.79    3.80
 -10  -3  -1   91.59    4.20
  10   4   1   25.60    2.70
 -10  -4   1   20.60    2.90
 -10   4  -1   23.80    3.00
 -10   4   1   25.90    3.10
  10   4  -1   28.50    2.60
 -10  -4  -1   23.30    2.40
  10   5   1   33.90    3.00
 -10  -5   1   34.60    2.60
 -10  -5  -1   35.10    3.10
  10   5  -1   34.70    2.90
  10   6   1    0.30    1.50
 -10  -6   1    1.30    1.00
 -10  -6  -1   -0.70    1.10
  10   6  -1    2.20    1.50
 -10  -7   1   32.50    2.00
  10   7   1   30.80    2.80
  10   7  -1   35.20    2.70
 -10  -7  -1   33.70    2.00
 -10  -8   1    1.30    0.70
 -10  -8  -1    0.30    0.80
 -10  -9   1   14.50    1.00
 -10  -9  -1   16.00    1.10
  11   0   1    1.30    1.40
 -11   0   1    1.80    1.30
  11   0  -1   -1.20    1.40
 -11   0  -1   -2.30    1.30
  11  -1  -1   40.10    3.10
 -11   1  -1   41.20    2.60
 -11  -1   1   36.10    2.40
  11   1   1   36.40    2.70
  11  -1   1   42.80    3.00
 -11   1   1   39.30    2.50
 -11  -1  -1   39.10    2.50
  11   1  -1   37.80    2.70
 -11  -2   1   46.40    2.70
  11   2   1   49.90    2.90
 -11   2  -1   47.60    2.70
  11   2  -1   50.99    2.80
 -11  -2  -1   43.50    2.70
 -11   2   1   44.10    2.70
 -11  -3   1   11.30    1.80
  11   3   1   10.10    1.60
 -11   3  -1   13.20    1.60
 -11   3   1   11.20    1.60
  11   3  -1    9.10    1.50
 -11  -3  -1   13.90    1.90
 -11  -4   1   61.89    3.50
 -11   4  -1   63.39    3.20
 -11   4   1   65.19    3.20
  11   5   1   12.90    1.70
 -11   5  -1   21.60    2.80
 -11  -5   1   14.50    1.70
 -11   5   1   16.50    2.00
  11   5  -1   14.50    1.70
 -11  -5  -1   15.30    2.30
 -11  -6   1   11.70    1.70
  11   6   1   10.50    1.50
 -11  -6  -1   11.20    1.80
  11   6  -1   13.80    1.50
 -11  -7   1    1.10    0.80
  11   7   1    1.00    1.30
 -11  -7  -1    2.80    0.90
  11   7  -1    3.00    1.30
 -11  -8   1    7.30    1.10
 -11  -8  -1    7.50    1.10
 -11  -9   1    0.40    0.50
 -11  -9  -1    0.50    0.50
 -12   0   1    0.80    1.10
  12   0   1    1.60    1.30
 -12   0  -1   -1.10    1.10
  12   0  -1   -0.30    1.30
  12   1   1   64.29    3.00
 -12  -1   1   60.69    2.80
  12  -1  -1   66.69    3.30
 -12   1  -1   66.89    2.90
 -12   1   1   66.19    2.90
 -12  -1  -1   62.89    2.80
  12  -1   1   67.59    3.30
  12   1  -1   57.99    3.00
 -12  -2   1   74.59    3.00
  12   2   1   79.79    3.30
 -12   2  -1   73.59    3.20
  12   2  -1   74.49    3.20
 -12  -2  -1   79.79    3.10
 -12   2   1   76.69    3.10
 -12  -3   1   37.30    2.70
  12   3   1   38.00    2.50
  12   3  -1   35.70    2.50
 -12  -3  -1   34.00    2.70
 -12   4  -1   -1.10    1.30
  12   4   1   -0.60    1.20
  12   4  -1   -0.50    1.20
 -12   4   1    1.10    1.30
 -12   5  -1    9.30    1.50
 -12  -5   1   11.00    1.50
  12   5   1    5.70    1.30
 -12  -5  -1    7.00    1.60
  12   5  -1    7.10    1.30
 -12   5   1   10.60    1.60
 -12   6  -1   11.50    2.30
  12   6   1    8.70    1.40
 -12  -6   1   10.10    1.30
  12   6  -1    8.60    1.30
 -12  -6  -1    9.50    1.30
  12   7   1    1.10    1.10
 -12  -7   1    0.40    0.80
  12   7  -1    2.70    1.10
 -12  -7  -1    0.60    0.90
  12   8   1    5.40    1.20
 -12  -8   1    4.30    0.70
 -12  -8  -1    3.90    0.70
 -12  -9   1    3.10    0.50
 -12  -9  -1    4.40    0.70
  13   0  -1   -0.50    1.60
 -13   0  -1    0.60    1.00
 -13   0   1    1.50    1.10
  13   0   1   -2.20    1.60
  13  -1  -1   38.50    2.70
 -13  -1   1   42.20    2.30
  13   1   1   48.40    2.60
 -13   1  -1   41.00    2.40
 -13  -1  -1   40.80    2.30
  13   1  -1   38.80    2.50
 -13   1   1   37.80    2.30
  13  -1   1   44.20    2.80
 -13   2  -1   13.20    1.50
  13   2   1   14.70    1.60
 -13  -2   1   11.90    1.40
  13   2  -1   10.60    1.40
 -13   2   1   12.30    1.40
 -13  -2  -1   13.70    1.40
  13   3   1   60.79    2.80
 -13   3  -1   62.59    2.70
 -13  -3   1   62.79    3.00
 -13  -3  -1   61.29    3.00
  13   3  -1   62.99    2.90
 -13   3   1   66.89    2.80
  13   4   1    8.30    1.30
 -13   4  -1    8.20    1.30
 -13   4   1    8.90    1.30
  13   4  -1    8.10    1.30
 -13   5  -1   20.70    2.10
  13   5   1   20.40    2.00
 -13   5   1   22.30    2.10
  13   5  -1   20.70    1.90
 -13   6  -1    2.70    1.30
 -13  -6   1    0.40    1.10
  13   6   1    0.70    1.00
  13   6  -1   -0.90    1.00
 -13   6   1    2.70    1.30
 -13  -6  -1    1.00    1.10
 -13  -7   1   23.00    1.40
  13   7   1   20.10    1.60
  13   7  -1   24.60    1.60
 -13  -7  -1   22.30    1.50
  13   8   1    1.80    1.00
 -13  -8   1    1.70    1.00
 -13  -8  -1    2.60    0.90
  14   0  -1    0.70    1.10
 -14   0   1   -0.40    0.90
 -14   0  -1    1.40    1.00
  14   0   1    0.40    1.20
 -14  -1   1  371.46    8.80
  14   1   1  363.26    8.90
 -14   1  -1  361.86    8.80
  14  -1  -1  354.26    8.70
 -14  -1  -1  372.36    8.80
 -14   1   1  364.36    8.80
  14   1  -1  354.66    8.80
  14  -1   1  355.36    8.80
 -14  -2   1   53.59    2.50
 -14   2  -1   55.19    2.50
 -14   2   1   52.09    2.50
  14   2  -1   53.59    2.70
 -14  -2  -1   50.39    2.50
 -14  -3   1  260.87    6.60
  14   3   1  263.37    6.80
 -14   3  -1  257.07    6.70
  14   3  -1  265.87    6.80
 -14  -3  -1  265.07    6.60
 -14   3   1  255.17    6.60
 -14   4  -1    4.40    1.10
  14   4   1    4.90    1.10
 -14   4   1    4.70    1.10
  14   4  -1    5.20    1.10
  14   5   1   15.70    1.70
 -14   5  -1   16.60    1.80
 -14   5   1   16.80    1.80
  14   5  -1   14.80    1.70
  14   6   1   10.50    1.10
 -14   6  -1   12.80    1.70
  14   6  -1   13.20    1.40
 -14   6   1   12.00    1.30
  14   7   1   18.20    1.30
  14   7  -1   18.90    1.30
  15   0   1    2.30    1.10
 -15   0  -1   -1.00    0.90
 -15   0   1    0.80    1.00
  15   0  -1   -0.80    1.00
 -15  -1   1   50.79    2.30
  15  -1  -1   45.20    2.50
 -15   1  -1   50.09    2.30
  15   1   1   44.70    2.40
  15   1  -1   45.30    2.40
  15  -1   1   46.40    2.50
 -15   1   1   46.60    2.30
 -15  -1  -1   44.30    2.20
  15   2   1  189.18    5.20
 -15   2  -1  188.48    5.10
 -15  -2   1  191.38    5.00
 -15   2   1  182.78    5.10
  15   2  -1  177.98    5.10
 -15  -2  -1  186.58    5.00
 -15   3  -1   22.60    1.80
  15   3   1   20.00    1.90
 -15  -3   1   21.10    2.10
 -15  -3  -1   20.80    2.20
 -15   3   1   26.00    1.80
  15   3  -1   21.70    1.90
  15   4   1    0.40    0.90
 -15   4  -1    0.70    0.90
  15   4  -1    0.10    0.90
 -15   4   1    0.10    0.90
 -15   5  -1    0.40    0.80
  15   5   1    1.70    0.90
 -15   5   1    1.70    0.80
  15   5  -1    1.50    0.90
  15   6   1    1.80    0.70
 -15   6  -1    1.70    0.90
 -15   6   1    2.80    0.90
  15   6  -1    2.40    0.70
  15   7   1    0.90    0.60
  15   7  -1    1.70    0.60
  16   0  -1   -0.80    1.00
 -16   0  -1    0.50    0.90
  16   0   1    0.00    1.00
 -16   0   1    0.90    0.80
 -16  -1   1  133.49    3.80
 -16   1  -1  136.19    3.90
  16   1   1  135.89    3.90
 -16   1   1  132.89    3.90
  16   1  -1  126.29    3.80
  16  -1   1  128.89    3.80
 -16  -1  -1  133.89    3.90
  16   2   1   60.99    2.50
 -16   2  -1   60.79    2.50
 -16  -2   1   60.79    2.30
 -16  -2  -1   63.59    2.40
  16   2  -1   59.19    2.40
 -16   2   1   62.29    2.50
 -16   3  -1    2.70    0.90
  16   3   1    3.10    1.00
  16   3  -1    3.10    0.90
 -16   3   1    3.30    0.90
 -16   4  -1   16.10    1.40
  16   4   1   19.30    1.50
 -16   4   1   16.50    1.40
  16   4  -1   16.80    1.40
  16   5   1    1.40    0.70
 -16   5  -1    2.20    0.80
  16   5  -1    2.40    0.70
 -16   5   1    2.20    0.80
 -16   6  -1    4.00    1.40
  16   6   1    5.30    0.70
  16   6  -1    6.40    0.70
 -16   6   1    6.00    1.30
  17   0   1    0.00    0.90
  17   0  -1    0.50    0.90
 -17   0   1   -0.10    0.80
 -17   0  -1    0.30    0.80
 -17  -1   1    9.60    1.30
  17   1   1   10.70    1.40
 -17   1  -1   11.30    1.50
 -17   1   1    9.80    1.10
  17   1  -1   11.20    1.40
 -17  -1  -1   11.30    1.40
 -17  -2   1    1.60    0.90
 -17   2  -1    0.60    0.80
  17   2   1   -0.30    0.80
 -17  -2  -1    1.50    0.80
 -17   2   1   -0.10    0.70
  17   2  -1    0.50    0.80
 -17   3  -1    2.40    0.70
  17   3   1    1.90    0.80
 -17   3   1    0.80    0.70
  17   3  -1    2.40    0.80
 -17   4  -1    0.90    0.70
  17   4   1    0.30    0.60
 -17   4   1   -0.80    0.60
  17   4  -1    0.10    0.60
 -17   5  -1   -0.60    0.60
  17   5   1   -0.80    0.50
  17   5  -1   -0.10    0.50
 -17   5   1    0.00    0.60
 -18   0   1   -0.60    0.60
 -18   0  -1    0.50    0.60
  18   1   1   24.40    1.40
 -18  -1   1   22.00    1.30
 -18   1  -1   22.20    1.30
 -18   1   1   22.00    1.30
 -18  -1  -1   22.40    1.30
  18   2   1   24.00    1.30
 -18  -2   1   24.40    1.50
 -18   2  -1   25.70    1.40
 -18  -2  -1   26.00    1.50
 -18   2   1   27.50    1.40
  18   2  -1   24.40    1.30
  18   3   1    5.90    0.80
 -18   3  -1    9.10    1.00
  18   3  -1    8.90    0.90
 -18   3   1    7.60    1.00
 -18   4  -1    5.70    0.70
  18   4   1    6.10    0.80
  18   4  -1    6.70    0.80
 -18   4   1    6.00    0.70
 -19   0   1    0.00    0.60
 -19   0  -1   -0.70    0.50
 -19  -1   1    1.00    0.70
 -19   1  -1    0.30    0.50
 -19  -1  -1    1.40    0.70
 -19   1   1   -0.10    0.50
 -19   2  -1    0.30    0.50
 -19   2   1    0.20    0.50
  19   3   1    1.00    0.50
 -19   3  -1    0.90    0.50
 -19   3   1    1.80    0.50
   0   0  -2 1122.69   23.70
   0  -1   2    0.40    0.30
   0  -1   2    2.50    0.50
   0   1  -2    1.00    0.30
   0   1  -2    0.50    0.50
   0   1   2    0.80    0.50
   0  -1  -2    1.10    0.50
   0  -2  -2 2344.07   48.50
   0  -2   2 2325.87   48.50
   0   2   2 2339.17   48.50
   0   2  -2 2265.27   48.50
   0  -3   2   -0.50    0.40
   0  -3   2    0.30    0.40
   0   3  -2   -0.30    0.60
   0   3   2    0.10    0.80
   0   4  -2  541.55   12.30
   0   4   2  559.74   12.90
   0   5   2    0.20    1.70
   0   5  -2    0.10    1.30
   0  -6   2  255.07    7.00
   0   6   2  278.47    8.60
   0  -6  -2  257.67    7.30
   0  -7   2    0.20    1.20
   0  -7  -2    1.20    1.40
   0  -8   2    2.40    1.00
   0  -8  -2    2.30    1.10
   0  -9   2    0.90    0.80
   0  -9  -2    0.50    0.90
   0 -10   2   32.40    1.60
   0 -10  -2   30.70    1.60
   0 -11  -2   -0.20    0.60
  -1   0  -2 3084.59   63.69
  -1   0   2 3062.89   63.79
   1   0   2 2991.90   63.69
   1   1   2  614.14   13.70
   1   1   2  630.04   13.60
  -1   1  -2  639.24   13.60
  -1  -1   2  618.14   13.50
  -1  -1   2  636.64   13.70
  -1  -1  -2  647.44   13.70
   1   1  -2  635.24   13.50
  -1   1   2  628.24   13.70
   1  -1   2  656.03   13.60
  -1  -2   2 3558.74   74.19
  -1   2  -2 3598.94   74.09
  -1  -2   2 3559.94   74.19
   1   2   2 3515.45   74.09
   1   2   2 3476.15   74.49
   1   2  -2 3566.74   74.09
  -1   2   2 3543.55   73.99
  -1  -2  -2 3552.04   74.09
  -1  -3   2 1241.28   26.60
   1   3   2 1277.87   27.30
  -1  -3   2 1267.57   27.00
  -1  -3   2 1240.38   26.60
  -1   3  -2 1245.28   26.60
   1   3   2 1243.98   26.60
  -1  -3  -2 1261.97   26.50
   1   3  -2 1289.47   26.90
  -1   4  -2  184.98    4.60
   1   4   2  185.78    5.40
   1   4  -2  180.08    4.90
  -1   4   2  185.98    5.30
  -1   5  -2   12.80    1.60
   1   5   2    9.60    1.90
   1   5  -2   11.00    1.70
  -1   5   2   10.70    2.10
   1   6   2   16.90    3.40
  -1  -6   2   20.60    2.40
   1  -6  -2   16.60    2.60
  -1   6   2   19.90    3.40
  -1  -6  -2   21.30    2.80
   1  -7  -2   30.60    2.70
  -1  -7   2   33.20    2.40
   1  -7   2   31.80    2.50
  -1  -7  -2   31.20    2.60
   1  -8  -2    9.10    1.40
  -1  -8   2    8.50    1.30
   1  -8   2   10.50    1.30
  -1  -8  -2    7.90    1.30
  -1  -9   2    9.80    1.40
   1  -9  -2   10.00    1.30
   1  -9   2   10.60    1.50
  -1  -9  -2    9.90    1.60
  -1 -10   2    8.80    1.10
   1 -10  -2    8.40    1.00
   1 -10   2    8.70    1.20
  -1 -10  -2   10.00    1.20
  -1 -11   2    9.40    0.90
  -1 -11  -2   10.10    0.90
   2   0   2   31.30    1.40
  -2   0   2   32.30    1.30
  -2   0  -2   32.20    1.20
   2   0   2   31.60    1.20
  -2   1  -2  453.75    9.80
  -2   1  -2  453.75    9.40
   2   1   2  431.16    9.80
  -2  -1   2  456.55    9.90
  -2  -1   2  448.96    9.80
   2  -1   2  445.86    9.40
  -2  -1  -2  432.26    9.90
  -2  -1  -2  431.46    9.90
   2   1  -2  427.26    9.70
  -2  -2   2  123.39    3.40
   2   2   2  115.19    3.50
  -2  -2   2  116.79    3.30
  -2   2  -2  120.79    3.20
   2   2   2  115.89    3.20
  -2   2   2  121.89    3.10
  -2  -2  -2  119.79    3.30
   2   2  -2  122.09    3.20
   2  -2   2  122.59    3.10
  -2  -2  -2  121.79    3.60
  -2   2   2  120.69    3.20
   2   3   2   32.80    1.60
  -2  -3   2   31.00    1.90
  -2   3  -2   31.70    1.40
  -2   3  -2   32.30    1.30
  -2  -3   2   31.10    1.70
   2   3   2   31.10    2.00
  -2  -3   2   30.10    1.60
  -2  -3  -2   30.50    1.80
  -2   3   2   32.30    1.30
  -2   3   2   32.70    1.30
   2   3  -2   33.00    1.70
   2  -3   2   32.10    1.30
   2   4   2   43.40    2.70
  -2  -4   2   41.60    1.70
  -2   4  -2   42.00    1.70
  -2  -4   2   40.80    2.60
  -2  -4   2   41.50    1.70
   2   4  -2   41.70    2.30
  -2   4   2   37.40    2.60
   2   5   2  575.04   14.00
  -2   5  -2  595.04   13.00
   2   5  -2  568.94   13.50
  -2   5   2  581.24   13.90
   2   6   2   24.00    3.70
  -2  -6   2   30.20    2.60
  -2  -6  -2   31.00    2.80
  -2   6   2   36.90    5.90
  -2  -7   2   30.00    2.20
   2  -7  -2   25.90    2.80
   2  -7   2   33.40    2.60
  -2  -7  -2   27.60    2.40
  -2  -8   2   41.60    2.30
   2  -8  -2   35.70    2.60
   2  -8   2   37.50    2.40
  -2  -8  -2   42.50    2.40
   2  -9  -2    9.20    1.30
  -2  -9   2    5.80    1.00
   2  -9   2    4.40    1.10
  -2  -9  -2    5.70    1.10
  -2 -10   2    4.20    0.70
  -2 -10  -2    4.20    0.80
  -2 -11  -2    0.90    0.60
  -3   0  -2 4656.03   97.39
  -3   0   2 4634.54   97.19
  -3   0  -2 4655.93   97.09
  -3   0   2 4650.53   97.39
  -3   1  -2  911.91   19.20
   3   1   2  826.12   19.10
  -3  -1   2  879.31   19.10
   3   1   2  877.01   19.20
  -3  -1   2  908.81   19.30
  -3   1  -2  886.31   18.70
   3   1  -2  877.51   19.00
  -3  -1  -2  858.51   19.20
  -3  -1  -2  882.51   19.20
   3  -1   2  877.91   18.70
   3  -1   2  894.01   19.10
  -3   1   2  896.81   19.20
  -3   2  -2 2152.68   44.70
  -3   2  -2 2107.59   44.20
   3   2   2 2059.69   45.00
  -3  -2   2 1978.40   45.30
   3   2   2 2124.89   44.80
  -3  -2   2 2121.89   44.90
  -3   2   2 2145.69   44.70
   3  -2   2 2089.09   44.70
  -3  -2  -2 2205.58   45.20
   3   2  -2 2167.78   44.80
   3   3   2   91.69    3.30
  -3  -3   2   90.19    3.20
  -3  -3   2   87.19    3.00
  -3   3  -2   89.09    2.40
  -3   3  -2   89.29    2.70
  -3   3  -2   90.69    2.30
   3   3   2   85.59    2.90
   3   3  -2   94.39    3.00
  -3   3   2   88.09    2.60
  -3  -3  -2   88.69    3.50
  -3  -3  -2   87.19    3.00
  -3   3   2   86.39    2.70
   3   4   2  136.19    3.90
  -3  -4   2  141.19    4.00
   3   4   2  142.69    4.70
  -3  -4   2  137.09    4.70
  -3   4  -2  141.49    3.60
   3   4  -2  137.99    4.30
  -3  -4  -2  137.19    4.00
   3   5   2    0.60    2.00
  -3   5   2    3.10    2.10
   3   5  -2    0.60    1.70
  -3  -6   2    9.70    1.60
  -3  -6  -2    6.80    1.70
   3  -7  -2   22.60    2.30
  -3  -7   2   23.50    2.10
  -3  -7  -2   22.20    2.30
  -3  -8   2   18.80    1.80
   3  -8  -2   15.80    2.40
  -3  -8  -2   19.50    1.90
  -3  -9   2   60.29    2.40
  -3  -9  -2   57.79    2.50
  -3 -10   2   17.50    1.30
  -3 -10  -2   19.20    1.30
  -3 -11   2   10.60    0.80
  -3 -11  -2   12.00    0.90
  -4   0  -2  299.17    7.30
   4   0   2  292.97    7.20
  -4   0  -2  291.57    6.90
  -4   0   2  292.27    7.30
   4   0  -2  297.37    7.00
   4   0   2  293.97    6.80
  -4   0   2  289.97    7.00
  -4  -1   2  564.74   12.40
  -4   1  -2  556.34   12.00
   4   1   2  545.15   12.30
   4   1   2  541.55   12.50
  -4   1  -2  540.75   12.50
  -4   1   2  556.04   12.50
  -4   1   2  565.64   12.40
   4   1  -2  525.65   12.30
   4  -1   2  547.75   11.90
   4  -1   2  539.85   12.40
  -4  -1  -2  542.25   12.40
  -4   2  -2  547.75   12.00
   4   2   2  555.14   12.70
  -4  -2   2  560.04   12.90
   4   2   2  563.64   12.70
  -4   2  -2  561.64   12.60
  -4  -2   2  562.24   12.70
   4  -2   2  559.74   12.50
  -4   2   2  559.64   12.60
  -4  -2  -2  545.75   12.70
   4   2  -2  539.75   12.50
  -4  -2  -2  549.45   12.90
  -4  -3   2  746.93   16.70
   4   3   2  728.53   16.40
  -4   3  -2  730.73   16.20
  -4  -3   2  720.93   16.50
  -4   3  -2  733.13   15.70
  -4  -3  -2  720.83   16.50
   4  -3   2  743.63   16.10
   4   3  -2  731.43   16.40
  -4   3   2  733.83   16.20
  -4  -3  -2  735.93   17.00
   4   4   2  149.19    4.40
  -4   4  -2  148.69    3.70
  -4   4  -2  148.19    3.80
  -4   4  -2  146.99    4.00
  -4  -4   2  147.79    4.70
  -4  -4   2  144.49    5.20
  -4  -4   2  149.69    4.80
   4   4   2  148.89    5.00
   4   4  -2  146.49    4.70
  -4   4   2  140.09    4.00
  -4  -4  -2  140.69    4.70
  -4   4   2  142.59    3.90
   4   5   2   29.90    3.90
  -4   5   2   24.80    2.70
   4   5  -2   35.30    3.40
  -4  -6   2  133.19    4.30
  -4  -6  -2  129.59    4.50
  -4  -7   2   11.50    1.90
  -4  -7  -2   12.80    2.10
  -4  -8   2   28.70    2.00
  -4  -8  -2   27.30    2.10
  -4  -9   2   12.20    1.40
  -4  -9  -2   13.90    1.60
  -4 -10   2    1.60    0.60
  -4 -10  -2    2.40    0.70
  -4 -11   2    0.30    0.50
  -4 -11  -2    0.50    0.50
   5   0  -2  493.25   11.50
  -5   0   2  516.75   11.60
   5   0   2  501.05   11.70
  -5   0   2  491.95   12.00
   5   0   2  502.45   11.30
  -5   0  -2  512.25   11.50
  -5   0  -2  488.35   11.80
   5   1   2   61.59    2.70
  -5   1  -2   64.09    2.30
  -5   1  -2   62.49    2.90
   5   1   2   65.49    2.50
  -5  -1   2   60.79    3.10
  -5  -1  -2   65.19    2.80
  -5   1   2   58.99    2.80
   5  -1   2   62.59    2.70
  -5   1   2   63.59    2.50
   5   1  -2   64.99    2.50
  -5  -1  -2   64.69    3.00
   5  -1   2   62.99    2.20
  -5   2  -2   30.00    1.60
   5   2   2   31.50    2.10
  -5  -2   2   26.50    2.20
  -5  -2   2   29.90    2.60
  -5   2  -2   32.20    2.30
   5   2   2   31.50    2.20
  -5  -2  -2   29.80    2.50
   5   2  -2   25.40    1.90
   5  -2   2   27.70    2.00
  -5   2   2   27.70    2.40
  -5   2   2   31.40    2.30
  -5  -2  -2   29.30    2.50
  -5   3  -2  385.26    8.70
   5   3   2  401.76    9.70
  -5   3  -2  385.06    9.40
  -5  -3   2  370.76    9.80
   5   3   2  380.66    9.40
  -5  -3   2  384.96    9.80
  -5   3   2  384.26    9.30
  -5   3   2  384.76    9.50
  -5  -3  -2  379.56    9.80
  -5  -3  -2  380.66   10.10
   5   3  -2  386.16    9.50
   5  -3   2  397.96    9.20
  -5  -4   2    1.20    2.30
  -5   4  -2    4.60    1.10
  -5   4  -2    6.00    1.20
   5   4   2    4.60    1.40
   5   4   2    4.70    1.90
  -5   4  -2    5.20    1.50
  -5   4   2    5.00    1.40
  -5  -4  -2    2.50    3.10
   5   4  -2    5.40    1.70
  -5   4   2    3.80    1.40
  -5  -5   2    0.50    1.40
   5   5   2   -2.40    2.60
   5   5  -2    1.80    2.50
  -5  -5  -2    1.40    1.70
  -5  -6   2   30.00    2.30
  -5  -6  -2   32.20    2.60
  -5  -7   2    0.20    1.00
  -5  -7  -2    0.10    1.10
  -5  -8   2   40.90    2.20
  -5  -8  -2   43.50    2.40
  -5  -9   2   42.30    2.00
  -5  -9  -2   44.40    2.10
  -5 -10   2    2.50    0.60
  -5 -10  -2    1.10    0.60
   6   0   2 2633.84   56.99
  -6   0   2 2716.93   56.79
   6   0   2 2575.74   56.39
  -6   0   2 2741.73   57.19
  -6   0  -2 2698.13   57.19
   6   0  -2 2648.54   56.69
   6   1   2  194.88    5.40
  -6  -1   2  201.18    5.70
   6   1   2  200.88    5.80
  -6   1  -2  198.78    6.00
  -6  -1   2  198.58    6.20
  -6   1  -2  197.28    5.20
   6  -1   2  197.58    5.60
  -6   1   2  195.88    6.00
   6   1  -2  196.98    5.40
   6  -1   2  193.58    5.10
  -6   1   2  193.98    5.50
  -6  -1  -2  186.78    5.90
  -6  -1  -2  205.78    5.80
   6   2   2  138.19    4.70
   6   2   2  137.79    4.50
  -6  -2   2  140.89    4.90
  -6   2  -2  135.79    4.00
  -6   2  -2  135.99    4.90
  -6  -2   2  140.09    5.30
   6   2  -2  147.49    4.50
  -6   2   2  143.59    4.90
  -6  -2  -2  128.99    5.10
   6  -2   2  142.49    4.50
  -6  -2  -2  146.29    5.10
  -6   2   2  142.29    4.50
   6   3   2  263.37    7.20
  -6  -3   2  261.57    7.80
   6   3   2  261.47    7.20
  -6   3  -2  267.27    7.30
  -6   3  -2  251.17    6.30
   6   3  -2  262.67    7.10
  -6   3   2  262.47    7.10
  -6   3   2  258.07    7.30
  -6  -3  -2  255.37    8.00
   6  -3   2  247.18    6.80
   6   4   2   90.99    4.00
   6   4   2   89.29    4.60
  -6   4   2   88.89    4.80
   6   4  -2   93.49    4.30
  -6  -5   2   -1.30    1.30
  -6  -5  -2    1.40    1.60
  -6  -6   2  338.27    8.50
  -6  -6  -2  335.47    8.70
  -6  -7   2    5.30    1.10
  -6  -7  -2    4.60    1.10
  -6  -8   2   14.30    1.60
  -6  -8  -2   15.80    1.70
  -6  -9   2   36.70    1.80
  -6  -9  -2   39.20    1.90
  -6 -10   2    1.90    0.60
  -6 -10  -2    2.30    0.60
  -7   0   2  372.46   10.10
  -7   0  -2  369.66    9.30
  -7   0  -2  355.26    9.90
  -7   0   2  373.86    9.50
   7   0   2  388.36    9.10
   7   0   2  366.86    9.60
  -7  -1   2  181.88    5.70
  -7  -1   2  172.78    6.40
  -7   1  -2  168.88    6.20
   7   1   2  171.58    5.20
  -7   1  -2  175.58    5.20
   7   1   2  176.58    5.60
   7  -1   2  165.38    4.80
  -7   1   2  185.68    6.20
   7  -1   2  171.88    5.50
   7   1  -2  182.28    5.30
  -7  -1  -2  175.58    6.30
  -7   1   2  178.78    5.50
  -7  -1  -2  185.08    5.80
  -7  -2   2   -2.40    2.00
  -7   2  -2   -3.10    2.10
   7   2   2   -1.20    1.20
   7   2   2   -0.40    1.40
   7  -2   2    1.00    1.30
  -7   2   2    0.30    2.00
  -7   2   2   -0.10    1.60
  -7  -2  -2   -0.80    2.10
   7   2  -2    2.80    1.30
  -7   3  -2    0.00    1.60
   7   3   2   -2.00    1.70
  -7   3  -2    2.10    2.50
   7   3   2    3.30    1.70
   7   3  -2   -0.50    1.70
  -7   3   2   -1.10    2.10
   7  -3   2   -1.80    1.50
  -7   3   2    4.70    2.40
   7   4   2  215.18    6.90
   7   4  -2  214.68    7.10
  -7   4   2  202.78    7.60
  -7  -5   2   26.90    2.50
  -7  -5  -2   22.60    2.70
  -7  -6   2   37.60    2.50
  -7  -6  -2   35.90    2.60
  -7  -7   2    1.30    1.00
  -7  -7  -2    1.80    1.00
  -7  -8   2   84.49    2.90
  -7  -8  -2   82.29    3.10
  -7  -9   2    2.20    0.70
  -7  -9  -2    1.40    0.70
  -7 -10   2   20.30    1.10
  -7 -10  -2   20.10    1.10
   8   0   2 1435.96   31.10
  -8   0  -2 1417.96   31.50
  -8   0   2 1462.65   31.80
  -8   0   2 1411.46   32.40
   8   0   2 1420.86   34.30
  -8   0  -2 1412.96   32.40
   8   1   2   87.29    4.30
  -8   1  -2   85.19    4.00
  -8   1  -2   79.99    5.70
  -8  -1   2   85.79    4.80
   8   1   2   80.89    3.60
   8  -1   2   77.19    4.00
   8   1  -2   88.19    3.80
  -8   1   2   83.39    4.40
  -8   1   2   77.79    5.50
  -8  -1  -2   80.29    4.70
  -8   2  -2  489.25   11.80
   8   2   2  478.75   11.90
  -8   2  -2  483.85   13.20
   8   2   2  479.35   12.30
   8   2  -2  474.35   12.00
  -8   2   2  474.15   13.10
   8  -2   2  486.95   12.10
  -8   2   2  471.55   12.20
   8   3   2   72.19    4.40
   8   3   2   69.59    4.60
  -8   3   2   66.49    5.30
   8  -3   2   77.69    4.50
   8   3  -2   74.59    4.40
  -8  -4   2    3.90    1.70
  -8  -4  -2    0.70    2.10
   8   5   2   32.10    3.70
  -8  -5   2   35.50    2.50
  -8  -5  -2   34.30    2.80
   8   5  -2   32.60    3.50
  -8  -6   2    5.50    1.30
  -8  -6  -2    5.70    1.30
   8   6  -2    1.90    2.60
  -8  -7   2    5.40    1.00
  -8  -7  -2    7.90    1.20
  -8  -8   2    1.20    0.80
  -8  -8  -2    0.00    0.80
  -8  -9   2   16.50    1.20
  -8  -9  -2   16.50    1.30
  -8 -10   2   35.70    1.30
  -8 -10  -2   36.00    1.40
   9   0   2   78.29    3.70
   9   0   2   75.89    4.30
  -9   0  -2   69.39    5.40
   9   1   2   36.90    3.80
  -9   1  -2   41.10    4.70
   9   1   2   35.00    3.40
   9   1  -2   44.60    3.60
   9  -1   2   35.40    4.00
  -9   2  -2  231.78    7.80
   9   2   2  230.38    7.30
   9   2   2  229.78    7.70
   9  -2   2  230.78    7.70
   9   2  -2  215.58    7.30
   9   3   2   59.79    5.30
   9   3   2   67.29    3.80
   9   3  -2   69.79    3.60
  -9  -4   2   17.60    2.00
   9   4   2   20.90    2.20
   9   4  -2   23.40    2.90
  -9  -4  -2   21.70    3.30
  -9  -5   2  374.96    9.10
   9   5   2  366.66    9.30
  -9  -5  -2  359.16    9.20
   9   5  -2  367.46    9.30
   9   6   2  233.78    6.70
  -9  -6   2  245.08    6.40
   9   6  -2  239.88    6.70
  -9  -6  -2  242.38    6.50
  -9  -7   2   85.09    3.00
   9   7  -2   73.99    4.60
  -9  -7  -2   85.99    3.20
  -9  -8   2   63.79    2.40
  -9  -8  -2   62.49    2.40
  -9  -9   2   12.50    1.10
  -9  -9  -2   13.10    1.20
  -9 -10   2   -0.50    0.40
  -9 -10  -2    0.60    0.50
 -10   0   2   30.70    2.60
 -10   0  -2   26.30    2.60
  10   0   2   26.90    3.00
  10   0   2   34.90    4.60
  10   1   2   92.69    5.80
  10   1   2   76.89    3.70
  10   1   2   82.39    5.50
 -10  -1   2   70.29    3.20
  10  -1   2   75.69    5.50
 -10  -1  -2   72.49    3.40
 -10   1   2   75.29    3.40
  10   1  -2   81.39    3.50
 -10  -2   2  266.27    7.00
  10   2   2  281.27    7.30
  10   2   2  292.17   10.10
  10  -2   2  275.87    9.20
 -10  -2  -2  268.37    7.10
 -10   2   2  266.87    7.20
  10   2  -2  267.47    7.20
 -10  -3   2    6.30    1.90
  10   3   2    4.70    1.70
 -10   3   2    5.00    1.70
  10   3  -2    1.60    1.50
 -10  -3  -2    1.50    2.00
  10   4   2   10.20    1.70
 -10  -4   2    9.50    1.80
 -10   4   2   10.00    2.00
 -10  -4  -2   13.40    2.10
  10   4  -2    8.50    1.70
 -10  -5   2   14.50    2.10
  10   5   2   12.10    1.80
 -10  -5  -2   14.70    2.40
  10   5  -2   12.90    1.80
 -10  -6   2    4.00    1.10
  10   6   2    1.70    1.50
  10   6  -2    2.60    1.40
 -10  -6  -2    4.70    1.30
  10   7   2    9.40    1.70
 -10  -7   2    5.30    1.00
  10   7  -2    8.20    1.60
 -10  -7  -2    6.70    1.10
 -10  -8   2   25.10    1.50
 -10  -8  -2   25.10    1.60
 -10  -9   2   45.80    1.60
 -10  -9  -2   44.00    1.60
  11   0  -2  460.45   10.80
 -11   0   2  437.76   10.50
  11   0   2  450.75   10.70
 -11   0  -2  437.76   10.60
  11   0   2  450.95   13.30
  11   1   2    8.80    1.60
 -11   1  -2    8.90    1.40
  11  -1  -2   10.90    1.90
 -11  -1   2    8.40    1.40
  11   1  -2    7.90    1.60
  11  -1   2    9.20    1.80
 -11  -1  -2    7.50    1.40
 -11   1   2    7.30    1.40
  11  -1   2    7.20    3.90
  11   2   2  132.89    4.50
 -11  -2   2  138.19    4.30
  11   2  -2  136.79    4.40
 -11  -2  -2  132.99    4.30
 -11   2   2  134.49    4.30
 -11   3  -2   15.60    1.80
 -11  -3   2   23.10    2.70
  11   3   2   25.10    2.50
 -11  -3  -2   23.00    2.10
  11   3  -2   20.60    2.30
 -11   3   2   21.00    2.40
 -11   4  -2   37.10    2.80
 -11  -4   2   32.40    2.90
  11   4   2   36.50    2.70
 -11   4   2   35.00    2.80
  11   4  -2   35.50    2.70
 -11  -5   2   91.59    3.40
  11   5   2   96.19    3.60
 -11   5  -2   98.39    3.80
 -11  -5  -2   93.29    3.70
  11   5  -2   90.19    3.60
 -11   5   2   96.79    3.80
 -11  -6   2   34.80    2.10
  11   6   2   36.60    2.50
 -11  -6  -2   36.90    2.20
  11   6  -2   37.30    2.40
 -11  -7   2   49.60    2.10
  11   7   2   51.69    3.10
 -11  -7  -2   51.29    2.20
  11   7  -2   51.79    2.70
 -11  -8   2    0.30    0.60
 -11  -8  -2    0.90    0.70
 -11  -9   2    1.10    0.50
 -11  -9  -2    1.30    0.50
 -12   0  -2    0.00    1.20
 -12   0   2    1.50    1.10
  12   0   2   -0.60    1.20
  12   0  -2    2.10    1.40
  12   1   2   29.70    2.40
 -12   1  -2   28.30    2.30
  12  -1  -2   28.40    2.60
 -12  -1   2   29.30    2.20
  12  -1   2   28.10    2.60
 -12  -1  -2   34.20    2.40
 -12   1   2   26.70    2.20
  12   1  -2   28.30    2.50
  12   2   2   22.50    2.30
 -12  -2   2   24.30    2.10
 -12   2  -2   22.90    2.20
 -12   2   2   20.00    2.20
 -12  -2  -2   24.60    2.20
  12   2  -2   21.00    2.30
  12   3   2   68.99    3.10
 -12   3  -2   61.79    3.00
 -12  -3   2   59.99    3.10
 -12   3   2   64.09    3.10
  12   3  -2   63.29    3.00
 -12  -3  -2   66.29    3.20
 -12   4  -2    1.90    1.30
  12   4   2   -0.40    1.10
  12   4  -2    0.50    1.20
 -12   4   2    0.50    1.20
  12   5   2   11.20    1.40
 -12  -5   2   11.40    1.50
 -12   5  -2   11.50    1.60
 -12  -5  -2   10.20    1.60
  12   5  -2   11.00    1.40
 -12   5   2   12.40    1.60
 -12   6  -2   49.20    2.90
  12   6   2   53.39    2.50
 -12  -6   2   50.19    2.30
  12   6  -2   53.29    2.50
 -12  -6  -2   51.39    2.40
  12   7   2   25.20    1.90
 -12  -7   2   22.10    1.50
 -12  -7  -2   24.90    1.70
  12   7  -2   24.40    1.80
 -12  -8   2   12.70    1.00
  12   8   2   11.40    1.40
 -12  -8  -2   11.50    1.10
 -12  -9   2   -0.70    0.40
 -12  -9  -2    0.10    0.40
 -13   0   2   21.30    2.00
  13   0   2   15.50    2.60
 -13   0  -2   23.70    2.00
 -13   1  -2   14.70    1.90
 -13  -1   2   11.90    1.40
  13   1   2   14.80    1.60
  13  -1  -2   12.40    1.70
 -13  -1  -2   13.10    1.40
  13   1  -2   15.70    2.10
  13  -1   2   13.80    1.70
 -13   1   2   13.00    1.80
 -13  -2   2   70.69    2.80
  13   2   2   64.19    3.00
 -13   2  -2   65.39    2.90
 -13   2   2   63.49    2.80
 -13  -2  -2   68.49    2.80
  13   2  -2   68.89    3.00
 -13  -3   2  229.98    6.00
 -13   3  -2  234.58    6.10
  13   3   2  227.58    6.20
 -13   3   2  231.78    6.10
 -13  -3  -2  230.78    6.10
  13   3  -2  229.38    6.20
  13   4   2    5.50    1.20
 -13   4  -2    5.40    1.20
  13   4  -2    4.20    1.20
 -13   4   2    3.70    1.20
  13   5   2   18.00    1.90
 -13   5  -2   18.10    2.00
  13   5  -2   16.30    1.90
 -13   5   2   19.10    2.00
  13   6   2    3.50    1.10
 -13   6  -2    3.60    1.30
 -13  -6   2    2.20    1.10
  13   6  -2    2.00    1.00
 -13  -6  -2    2.00    1.20
 -13   6   2    3.10    1.30
  13   7   2    1.00    0.90
 -13  -7   2    0.70    0.80
 -13  -7  -2   -0.10    0.80
  13   7  -2   -0.50    0.80
 -13  -8   2   -0.20    1.00
  13   8   2    1.20    1.00
 -13  -8  -2    1.10    0.60
  14   0   2   33.00    2.30
  14   0  -2   34.40    2.20
 -14   0  -2   33.60    2.10
 -14   0   2   35.90    2.20
 -14   1  -2   59.69    2.60
 -14  -1   2   61.09    2.60
  14  -1  -2   59.19    2.70
  14   1   2   55.09    2.70
 -14   1   2   59.69    2.60
  14  -1   2   59.69    2.80
 -14  -1  -2   60.39    2.60
  14   1  -2   53.99    2.70
 -14   2  -2    8.00    1.30
  14   2   2   10.80    1.40
 -14  -2   2   10.90    1.30
 -14  -2  -2   13.20    1.80
  14   2  -2   10.00    1.40
 -14   2   2   10.60    1.30
  14   3   2    4.90    1.20
 -14  -3   2    5.40    1.40
 -14   3  -2    6.50    1.20
 -14  -3  -2    5.50    1.40
  14   3  -2    8.50    1.30
 -14   3   2    6.50    1.10
  14   4   2    5.90    1.20
 -14   4  -2    6.00    1.10
  14   4  -2    6.20    1.20
 -14   4   2    6.70    1.10
 -14   5  -2    3.10    1.10
  14   5   2    4.00    1.10
 -14   5   2    2.60    1.00
  14   5  -2    2.70    0.90
 -14   6  -2   15.00    1.70
  14   6   2   13.30    1.40
  14   6  -2   12.90    1.40
 -14   6   2   14.60    1.80
  14   7   2    8.90    1.20
  14   7  -2   11.20    1.10
  15   0  -2    6.00    1.20
  15   0   2    3.20    1.10
 -15   0   2    3.30    1.10
 -15   0  -2    4.60    1.10
 -15   1  -2   28.90    1.90
  15  -1  -2   25.40    2.10
  15   1   2   23.80    2.00
 -15  -1   2   28.40    1.90
  15   1  -2   26.30    2.00
 -15  -1  -2   25.30    1.90
 -15   1   2   24.50    1.90
  15  -1   2   27.00    2.30
  15   2   2   41.60    2.30
 -15   2  -2   41.80    2.20
 -15  -2   2   38.60    2.10
 -15   2   2   39.10    2.20
 -15  -2  -2   39.70    2.10
  15   2  -2   43.30    2.30
 -15   3  -2   97.69    3.20
 -15  -3   2   99.29    3.30
  15   3   2   99.69    3.40
  15   3  -2   98.49    3.30
 -15   3   2  100.39    3.30
 -15  -3  -2   98.39    4.10
  15   4   2   -0.60    0.90
 -15   4  -2   -0.10    0.90
  15   4  -2    0.00    0.90
 -15   4   2   -1.60    0.80
  15   5   2    6.50    1.00
 -15   5  -2    5.90    1.00
 -15   5   2    7.40    1.00
  15   5  -2    8.40    1.10
 -15   6  -2    3.30    0.90
  15   6   2    3.50    0.80
 -15   6   2    2.50    0.90
  15   6  -2    3.40    0.70
  15   7   2    3.00    0.70
  16   0   2  130.39    3.90
  16   0  -2  134.49    3.80
 -16   0   2  132.09    3.90
 -16   0  -2  137.39    3.90
 -16   1  -2   -0.30    0.80
 -16  -1   2   -0.30    0.80
  16   1   2   -0.80    0.90
  16  -1   2   -0.20    1.20
 -16  -1  -2    0.60    0.90
 -16   1   2    0.50    0.80
  16   1  -2   -0.10    0.90
  16   2   2   10.50    1.30
 -16   2  -2   10.80    1.20
 -16  -2   2   11.30    1.50
 -16   2   2   15.10    1.60
 -16  -2  -2   11.90    1.60
  16   2  -2   10.50    1.20
  16   3   2    7.30    1.10
 -16   3  -2    7.30    1.00
  16   3  -2    6.50    1.00
 -16   3   2    4.20    0.90
 -16   4  -2    0.50    0.80
  16   4   2    0.20    0.80
 -16   4   2   -1.00    0.70
  16   4  -2    0.00    0.80
 -16   5  -2    2.50    0.80
  16   5   2    1.10    0.70
 -16   5   2    0.40    0.70
  16   5  -2    0.10    0.70
  16   6   2   13.50    1.10
 -16   6  -2   12.90    1.50
  16   6  -2   14.40    1.00
  17   0   2   25.70    1.70
 -17   0   2   24.50    1.90
 -17   0  -2   24.50    2.10
  17   1   2   31.00    1.70
 -17  -1   2   29.10    1.60
 -17   1  -2   29.40    2.80
 -17   1   2   29.30    2.60
  17   1  -2   27.50    1.60
 -17  -1  -2   29.40    1.60
 -17   2  -2    3.00    0.80
 -17  -2   2    2.80    0.90
  17   2   2    3.60    0.90
 -17  -2  -2    5.00    0.90
 -17   2   2    4.00    0.90
  17   2  -2    4.40    0.90
  17   3   2    0.30    0.70
 -17   3  -2   -0.10    0.70
 -17   3   2    0.10    0.70
  17   3  -2    0.90    0.70
  17   4   2    1.50    0.70
 -17   4  -2    1.30    0.70
  17   4  -2    0.80    0.60
 -17   4   2    0.80    0.60
 -17   5  -2    1.30    0.60
  17   5   2    1.50    0.60
  17   5  -2    1.50    0.50
 -17   5   2   -0.50    0.60
 -18   0  -2    9.40    1.10
 -18   0   2    9.70    1.10
  18   0   2   12.00    1.40
 -18  -1   2    2.10    0.70
 -18   1  -2    2.80    0.70
  18   1   2    2.60    0.80
 -18  -1  -2    3.30    0.70
 -18   1   2    2.40    0.70
 -18   2  -2    1.80    0.70
  18   2   2    1.90    0.70
 -18  -2   2    2.00    0.90
 -18   2   2    1.80    0.70
 -18  -2  -2    2.10    1.00
  18   3   2    0.20    0.60
 -18   3  -2   -1.00    0.50
  18   3  -2   -0.50    0.60
 -18   3   2   -0.60    0.60
  18   4   2    1.40    0.50
 -18   4  -2    1.60    0.60
 -18   4   2    1.10    0.50
 -19   0   2   18.60    1.10
 -19   0  -2   20.10    1.10
 -19   1  -2    3.90    0.60
 -19  -1   2    4.50    0.70
 -19   1   2    2.20    0.60
 -19  -1  -2    2.80    0.70
 -19   2  -2   -0.40    0.50
  19   2   2   -0.20    0.60
 -19   2   2   -0.40    0.50
 -19   3  -2   -0.40    0.50
  19   3   2    0.40    0.50
 -19   3   2   -0.10    0.50
   0   0   3    0.70    0.60
   0   0  -3    0.00    0.60
   0   1  -3   -0.60    0.50
   0   1   3    0.20    0.50
   0  -1   3    0.80    0.50
   0  -1  -3    0.10    0.50
   0   2  -3  193.88    4.20
   0  -2  -3  188.58    4.60
   0  -2   3  186.18    4.30
   0  -2   3  186.78    4.60
   0   2  -3  188.68    4.70
   0   2   3  191.48    4.50
   0  -3   3    0.30    1.00
   0   3   3    1.10    0.50
   0   3   3    0.00    0.90
   0   3  -3   -0.60    0.50
   0   4  -3   94.09    2.80
   0   5  -3   -0.50    1.30
   0   5   3    1.40    1.80
   0  -6   3  139.29    4.50
   0  -6  -3  136.39    5.00
   0   6   3  143.39    6.80
   0  -7  -3    3.50    1.40
   0  -7   3    1.20    1.20
   0  -8  -3   60.59    2.90
   0  -8   3   59.99    2.60
   0  -9   3    0.40    0.80
   0  -9  -3    0.40    1.00
   0 -10  -3   21.20    1.40
   0 -10   3   18.50    1.20
   0 -11  -3   -0.90    0.70
  -1   0  -3    0.00    0.60
   1   0   3    0.60    0.50
   1   0   3    0.30    0.40
  -1   0   3   -0.30    0.60
   1   0  -3    0.60    0.60
  -1  -1   3 2871.51   60.89
  -1   1  -3 2872.61   61.19
   1   1   3 2823.02   61.19
  -1  -1   3 2971.60   61.29
   1   1   3 2902.31   61.19
  -1   1   3 3024.70   61.19
  -1  -1  -3 2928.31   61.19
   1  -1   3 2926.51   61.19
  -1  -2   3  133.59    3.60
  -1   2  -3  134.79    3.50
   1   2   3  130.69    3.80
   1   2   3  133.29    3.50
  -1  -2   3  133.39    3.40
   1   2  -3  128.99    3.30
  -1   2   3  133.19    3.40
  -1  -2  -3  130.39    3.50
   1  -2   3  139.59    3.50
   1   3   3  997.20   22.00
  -1   3  -3 1002.90   21.40
  -1  -3   3 1022.80   21.50
   1   3   3  980.60   21.30
  -1   3   3  999.60   21.10
   1   3  -3  996.80   21.30
   1  -3   3  963.30   21.20
  -1  -3  -3 1004.10   21.30
  -1  -4   3 1470.85   31.60
  -1   4  -3 1494.05   31.60
  -1  -4   3 1515.35   31.60
   1   4   3 1511.15   32.80
   1   4  -3 1509.25   32.00
  -1   4   3 1486.85   32.70
   1   5   3  148.89    5.40
  -1   5   3  153.78    5.40
   1   5  -3  161.58    4.70
   1  -6  -3  256.07    7.50
  -1  -6   3  264.07    7.00
   1   6   3  307.27   10.60
   1  -6   3  250.17    7.10
  -1   6   3  250.47    9.00
  -1  -6  -3  265.47    7.40
  -1  -7   3    6.20    1.30
   1  -7  -3    7.20    1.70
   1  -7   3    6.80    1.40
  -1  -7  -3    8.50    1.70
   1  -8  -3    2.20    1.20
  -1  -8   3    2.30    1.00
  -1  -8  -3    1.50    1.10
   1  -8   3    0.70    1.00
  -1  -9   3   43.90    2.00
   1  -9  -3   45.40    2.30
   1  -9   3   42.60    2.10
  -1  -9  -3   44.40    2.30
   1 -10  -3    1.70    0.80
  -1 -10   3    1.00    0.60
   1 -10   3    1.30    0.80
  -1 -10  -3    1.60    0.80
  -1 -11   3   -1.00    0.60
  -1 -11  -3   -0.40    0.60
  -2   0  -3   -0.70    0.40
  -2   0  -3   -0.30    0.60
   2   0   3    0.00    0.60
   2   0   3    0.50    0.40
  -2   0   3    0.30    0.60
   2   1   3 2262.07   48.30
  -2   1  -3 2400.16   48.40
  -2  -1   3 2281.37   48.20
   2   1   3 2261.57   48.30
  -2   1   3 2225.88   48.40
   2  -1   3 2250.87   48.30
   2  -1   3 2241.78   47.70
  -2  -1  -3 2343.17   48.40
   2   1  -3 2273.77   48.20
  -2  -1  -3 2368.36   48.40
  -2  -2   3  253.27    6.00
  -2  -2   3  252.77    6.20
   2   2   3  249.58    6.30
   2   2   3  246.08    6.00
  -2   2  -3  247.58    6.00
   2   2  -3  245.78    5.90
  -2  -2  -3  248.28    6.10
  -2   2   3  248.28    6.00
   2  -2   3  253.27    6.00
  -2  -3   3   41.70    2.00
  -2  -3   3   39.50    2.00
   2   3   3   41.10    1.80
   2   3   3   39.00    2.30
  -2  -3   3   39.00    2.00
  -2   3  -3   39.00    1.80
  -2  -3  -3   41.40    1.90
  -2   3   3   38.70    1.60
   2   3  -3   39.50    1.80
  -2   3   3   38.90    1.60
  -2  -4   3 1132.99   24.30
   2   4   3 1098.69   24.20
   2   4   3 1168.78   25.30
  -2  -4   3 1145.59   24.30
  -2  -4  -3 1131.99   24.20
   2   4  -3 1130.49   24.60
   2   5   3    4.80    2.10
  -2   5   3    8.80    2.10
   2   5  -3    5.40    1.70
  -2  -6   3  196.38    5.60
   2  -6  -3  199.18    6.70
  -2  -6  -3  198.08    6.00
  -2   6   3  200.38    8.30
  -2  -7   3    8.60    1.40
   2  -7  -3    6.70    1.80
   2  -7   3    6.90    1.40
  -2  -7  -3    6.30    1.50
   2  -8  -3   58.49    2.90
  -2  -8   3   56.39    2.50
  -2  -8  -3   55.49    2.80
   2  -8   3   56.19    2.60
  -2  -9   3   29.80    1.80
   2  -9  -3   28.10    2.10
   2  -9   3   30.10    1.90
  -2  -9  -3   29.30    1.90
  -2 -10   3   32.80    1.50
  -2 -10  -3   32.40    1.60
  -2 -11   3    1.20    0.60
  -2 -11  -3    0.90    1.00
  -3   0   3   -0.30    0.70
   3   0   3   -0.60    0.70
   3   0   3   -0.10    0.50
  -3   0  -3    0.30    0.60
  -3   0  -3   -0.30    0.70
  -3   1  -3 5645.44  117.29
  -3  -1   3 5719.13  117.19
  -3  -1   3 5754.02  117.49
  -3   1   3 5552.54  117.29
  -3  -1  -3 5663.73  117.29
  -3  -1  -3 5533.65  117.39
   3   1  -3 5503.75  117.09
   3  -1   3 5459.75  117.29
  -3  -2   3   22.10    1.60
  -3   2  -3   20.80    1.60
   3   2   3   20.80    1.60
   3   2   3   20.70    1.70
  -3  -2   3   22.40    1.90
  -3  -2  -3   20.30    1.80
  -3   2   3   21.70    1.60
  -3  -2  -3   17.70    1.90
   3  -2   3   18.80    1.50
   3   2  -3   19.00    1.40
   3   3   3  801.52   18.20
  -3  -3   3  827.82   18.00
   3   3   3  793.92   17.80
  -3   3  -3  796.82   17.70
  -3  -3   3  830.12   18.00
  -3  -3   3  811.22   18.00
  -3   3   3  786.62   17.60
  -3  -3  -3  812.02   17.90
  -3   3   3  786.22   17.50
   3   3  -3  818.12   17.80
   3  -3   3  818.02   17.60
  -3   4  -3   30.60    2.00
   3   4   3   30.60    1.90
  -3  -4   3   29.00    2.80
  -3  -4   3   30.60    2.40
  -3  -4   3   32.20    2.20
   3   4   3   27.90    2.60
   3  -4   3   31.20    1.50
  -3  -4  -3   34.60    2.40
   3   4  -3   30.50    2.30
   3   5   3  286.37    8.50
   3   5  -3  295.27    7.90
  -3   5   3  294.37    8.30
  -3  -6   3   11.00    1.60
  -3  -6  -3    8.30    1.70
   3  -7  -3   11.20    2.00
  -3  -7   3    9.30    1.90
   3  -8  -3   15.60    2.40
  -3  -8   3   14.00    1.70
  -3  -8  -3   14.40    1.90
  -3  -9   3   29.50    1.80
  -3  -9  -3   30.00    1.90
  -3 -10   3    0.20    0.60
  -3 -10  -3    0.40    0.70
  -3 -11   3    6.90    1.00
  -3 -11  -3    6.80    0.90
  -4   0   3    0.40    1.00
  -4   0  -3   -0.10    0.80
  -4   0  -3    1.50    1.10
   4   0   3   -1.00    0.80
   4   0   3   -0.20    0.70
   4   1   3 3717.03   78.69
  -4   1  -3 3745.63   78.09
  -4  -1   3 3703.33   78.59
  -4  -1   3 3797.32   78.89
  -4   1  -3 3692.83   78.69
   4   1   3 3682.13   78.49
  -4   1   3 3757.52   78.69
  -4   1   3 3809.52   78.59
   4  -1   3 3698.03   78.59
  -4  -1  -3 3783.32   78.69
   4   1  -3 3691.33   78.49
  -4  -1  -3 3756.72   78.79
   4  -1   3 3706.53   77.99
  -4   2  -3  673.53   13.90
  -4  -2   3  658.13   14.90
  -4   2  -3  660.53   14.70
   4   2   3  653.93   14.70
  -4  -2   3  585.14   14.90
   4   2   3  661.33   14.80
   4   2  -3  645.74   14.50
  -4  -2  -3  668.23   15.00
   4  -2   3  646.44   14.60
  -4   2   3  640.24   14.60
  -4  -2  -3  646.44   14.80
   4   3   3  112.19    3.60
  -4   3  -3  109.09    3.60
   4   3   3  111.49    3.90
  -4  -3   3  103.39    3.90
  -4  -3   3  113.59    4.10
  -4   3   3  105.89    3.60
  -4  -3  -3  106.39    3.90
   4   3  -3  111.79    3.60
  -4   3   3  105.89    3.50
  -4  -3  -3  107.79    4.30
   4  -3   3   99.39    3.60
   4   4   3   14.90    2.10
  -4   4  -3   16.70    2.20
  -4  -4   3   15.60    1.70
   4   4   3   12.10    2.00
  -4  -4   3   16.70    2.10
  -4  -4   3   22.00    3.10
   4  -4   3   13.80    1.80
  -4  -4  -3   15.70    2.10
  -4   4   3   13.90    1.90
   4   4  -3   12.80    1.70
  -4   4   3   13.70    1.80
   4   5   3  171.78    6.50
  -4  -5   3  162.88    7.20
   4   5  -3  164.98    5.60
  -4   5   3  164.98    6.20
  -4  -6   3   20.30    2.20
  -4  -6  -3   18.90    2.50
  -4  -7   3   12.80    1.80
  -4  -7  -3   15.00    2.20
  -4  -8   3   36.80    2.10
  -4  -8  -3   37.40    2.40
  -4  -9   3   45.40    2.00
  -4  -9  -3   46.00    2.30
  -4 -10   3   60.09    2.00
  -4 -10  -3   64.59    2.20
  -4 -11   3    0.90    0.70
  -4 -11  -3    1.80    0.60
   5   0   3    0.70    0.90
  -5   0  -3   -0.60    0.80
  -5   0   3    1.10    1.20
  -5   0  -3   -1.50    1.20
  -5   0   3    0.20    0.90
   5   0   3    1.20    0.70
  -5  -1   3  279.57    7.00
  -5  -1   3  276.57    7.40
   5   1   3  257.97    6.70
  -5   1  -3  275.07    6.50
  -5   1  -3  273.97    7.20
   5   1   3  279.97    7.10
  -5   1   3  265.47    6.80
  -5  -1  -3  270.27    7.30
   5   1  -3  266.67    6.80
  -5   1   3  275.97    7.20
  -5  -1  -3  260.47    7.50
   5  -1   3  270.37    6.30
   5  -1   3  272.07    7.00
  -5   2  -3 1228.78   25.70
  -5  -2   3 1193.68   26.80
   5   2   3 1211.68   26.50
  -5  -2   3 1202.68   26.60
  -5   2  -3 1203.88   26.50
   5   2   3 1201.48   26.50
  -5   2   3 1194.38   26.40
   5  -2   3 1211.48   26.40
   5   2  -3 1217.38   26.30
  -5  -2  -3 1216.28   26.70
  -5  -2  -3 1185.28   26.70
  -5   2   3 1225.38   26.50
   5   3   3 1686.43   36.90
  -5   3  -3 1732.03   36.80
  -5  -3   3 1731.93   37.20
   5   3   3 1745.93   37.10
  -5  -3   3 1650.63   37.20
   5   3  -3 1685.63   36.80
  -5  -3  -3 1710.13   37.10
   5  -3   3 1686.73   36.60
  -5   3   3 1715.13   36.70
  -5  -3  -3 1686.73   37.40
  -5  -4   3  797.92   19.00
  -5   4  -3  817.22   18.10
  -5  -4   3  815.02   18.60
   5   4   3  826.62   18.90
   5   4   3  817.52   18.20
  -5   4   3  733.33   17.80
   5   4  -3  819.92   18.40
  -5   4   3  797.92   17.90
  -5  -5   3   14.00    1.80
   5   5  -3    8.70    2.70
  -5  -5  -3   11.90    2.00
  -5  -6   3   84.99    3.30
  -5  -6  -3   83.09    3.60
  -5  -7   3    5.00    1.10
  -5  -7  -3    6.60    1.40
  -5  -8   3  181.48    5.10
  -5  -8  -3  188.28    5.40
  -5  -9   3   12.10    1.40
  -5  -9  -3    9.10    1.40
  -5 -10   3   42.60    1.60
  -5 -10  -3   41.10    1.70
   6   0   3    0.00    1.00
  -6   0   3    2.10    1.60
  -6   0  -3    0.60    1.40
   6   0   3    0.20    0.80
  -6   0   3    2.40    1.30
  -6  -1   3  220.78    6.90
  -6  -1   3  222.18    6.20
   6   1   3  224.18    6.30
   6   1   3  209.88    5.80
  -6   1  -3  229.18    6.60
  -6   1  -3  215.78    5.70
  -6   1   3  225.88    6.10
  -6   1   3  223.98    6.60
  -6  -1  -3  219.98    6.70
   6   1  -3  198.48    6.40
   6  -1   3  221.58    6.20
   6  -1   3  216.48    5.50
  -6  -1  -3  225.28    6.30
  -6   2  -3  928.91   20.80
  -6   2  -3  909.51   19.70
  -6  -2   3  907.91   20.70
   6   2   3  894.61   20.60
  -6  -2   3  884.31   21.00
   6   2   3  917.31   20.40
  -6   2   3  899.91   20.40
   6  -2   3  929.41   20.50
  -6  -2  -3  883.41   20.90
  -6  -2  -3  902.91   20.80
  -6   2   3  910.61   20.70
   6   2  -3  927.81   20.30
  -6   3  -3  925.01   19.70
  -6  -3   3  900.21   21.20
  -6   3  -3  912.01   20.80
   6   3   3  913.71   20.80
   6   3   3  958.60   21.00
  -6   3   3  916.11   20.80
  -6  -3  -3  893.71   21.50
   6  -3   3  898.11   20.50
   6   3  -3  921.11   20.70
  -6   3   3  915.11   20.80
   6   4   3  554.64   13.80
   6   4   3  530.15   13.10
   6   4  -3  557.84   13.30
  -6   4   3  536.95   12.90
  -6   4   3  532.35   13.70
  -6  -5   3    1.50    1.30
  -6  -5  -3   -0.20    1.60
  -6  -6   3    9.50    1.40
  -6  -6  -3    7.30    1.70
  -6  -7   3   18.00    1.80
  -6  -7  -3   17.00    2.00
  -6  -8   3    1.50    0.90
  -6  -8  -3    1.20    0.90
  -6  -9   3   20.40    1.50
  -6  -9  -3   20.20    1.70
  -6 -10   3   12.60    1.00
  -6 -10  -3   14.50    1.10
  -7   0  -3   -3.40    2.00
   7   0   3   -0.60    1.30
  -7   0   3    1.20    1.60
  -7   0   3   -1.70    2.10
  -7   0  -3    1.30    1.50
   7   1   3  172.38    5.20
  -7   1  -3  179.08    6.30
   7   1   3  165.28    5.70
  -7  -1   3  165.48    6.60
  -7   1  -3  167.98    5.10
  -7  -1   3  170.88    5.80
  -7  -1  -3  174.78    5.70
   7   1  -3  178.88    5.30
  -7   1   3  174.28    6.30
  -7   1   3  171.98    5.60
   7  -1   3  172.18    5.50
  -7  -1  -3  168.08    6.50
   7  -1   3  179.18    4.80
   7   2   3  446.06   11.20
   7   2   3  442.66   10.80
  -7   2  -3  436.76   11.50
  -7   2  -3  435.16   10.30
  -7  -2   3  442.06   11.50
   7  -2   3  448.46   11.00
  -7   2   3  434.06   11.60
   7   2  -3  437.86   10.80
  -7   2   3  420.96   11.00
  -7  -2  -3  429.86   11.50
  -7   3  -3  319.17    7.80
   7   3   3  314.67    8.70
   7   3   3  312.57    8.70
   7   3  -3  323.67    8.60
  -7   3   3  313.87    8.90
  -7   3   3  315.67    9.40
   7  -3   3  315.17    8.50
   7   4   3  221.18    7.30
   7   4  -3  225.08    7.40
  -7   4   3  236.28    7.10
  -7  -5   3    5.40    1.30
  -7  -5  -3    8.90    1.80
   7   5  -3    7.80    3.40
  -7  -6   3   17.20    2.70
  -7  -6  -3   20.30    2.60
  -7  -7   3   25.80    1.90
  -7  -7  -3   27.80    2.20
  -7  -8   3   73.19    2.70
  -7  -8  -3   72.99    2.90
  -7  -9   3    2.20    0.70
  -7  -9  -3    2.20    0.80
  -7 -10   3   30.20    1.20
  -7 -10  -3   30.40    1.40
  -8   0   3   -1.50    2.10
   8   0   3   -0.70    1.40
  -8   0  -3    1.30    2.00
  -8   0  -3    4.60    3.00
  -8   0   3   -2.30    3.10
   8   0   3    1.70    1.80
   8   1   3  522.55   12.60
  -8  -1   3  514.15   13.40
  -8   1  -3  524.95   14.10
  -8   1  -3  520.35   12.70
   8   1   3  531.95   13.20
   8  -1   3  525.45   13.10
   8   1  -3  532.55   12.90
  -8  -1  -3  513.05   13.30
  -8   1   3  512.15   14.00
  -8   1   3  532.15   13.20
  -8   2  -3  565.34   14.80
   8   2   3  549.74   13.70
   8   2   3  552.24   13.40
  -8   2  -3  533.15   13.00
  -8   2   3  529.85   13.80
   8  -2   3  559.84   13.70
  -8   2   3  539.35   14.70
   8   2  -3  561.24   13.50
   8   3   3  873.21   21.00
   8   3   3  909.11   21.20
   8  -3   3  915.41   21.00
   8   3  -3  892.61   20.90
   8   4   3   -0.80    2.30
  -8  -4   3   -1.70    1.60
   8   4   3    4.70    4.50
  -8  -4  -3    0.40    2.00
  -8   4   3    1.20    2.90
   8   4  -3   -4.00    2.00
   8   5   3    8.40    2.20
  -8  -5   3    6.50    1.40
   8   5  -3    5.90    2.10
  -8  -5  -3    9.60    1.70
  -8  -6   3   26.10    2.10
   8   6  -3   26.40    2.60
  -8  -6  -3   22.50    2.30
  -8  -7   3   -1.50    0.80
  -8  -7  -3   -1.00    0.90
  -8  -8   3    2.20    0.80
  -8  -8  -3    3.50    1.00
  -8  -9   3    1.70    0.60
  -8  -9  -3    2.20    0.70
  -8 -10   3    3.60    0.50
  -8 -10  -3    5.50    0.80
   9   0   3   -1.90    1.90
   9   0   3    0.60    1.80
  -9   0  -3    3.90    3.10
   9   1   3  209.78    6.70
   9   1   3  201.68    7.10
  -9   1  -3  208.28    7.30
   9  -1   3  217.38    7.30
   9   2   3   62.89    4.30
   9   2   3   57.89    4.90
   9   2  -3   66.49    4.80
   9   3   3   22.20    3.50
   9   3   3   22.60    3.10
   9   3  -3   22.30    2.90
   9   4   3   41.50    3.30
  -9  -4   3   38.30    2.90
  -9   4   3   37.40    3.90
  -9  -4  -3   35.70    3.40
   9   4  -3   42.50    3.20
  -9  -5   3   14.10    2.10
   9   5   3   15.60    2.10
  -9  -5  -3   14.30    1.90
   9   5  -3   16.80    2.10
   9   6   3   -0.20    1.80
  -9  -6   3    3.10    1.10
  -9  -6  -3    1.40    1.10
   9   6  -3    2.30    1.70
  -9  -7   3    5.80    1.10
  -9  -7  -3    4.60    1.10
   9   7  -3    3.50    1.70
  -9  -8   3    5.20    0.90
  -9  -8  -3    6.90    1.00
  -9  -9   3    1.90    0.60
  -9  -9  -3    1.90    0.60
  -9 -10   3    0.20    0.40
  -9 -10  -3    0.00    0.40
  10   0   3    2.70    2.40
  10   0  -3    2.40    1.70
 -10   0   3    0.40    1.30
  10   0   3   -4.50    2.60
  10   0   3    3.10    1.70
  10   1   3   81.29    3.60
  10   1   3   73.59    5.80
 -10  -1   3   74.09    3.30
  10   1  -3   79.19    3.50
 -10   1   3   77.09    3.30
 -10  -1  -3   80.39    3.30
  10  -1   3   79.49    5.70
  10   2   3  501.55   12.10
 -10  -2   3  506.65   11.80
  10   2  -3  524.45   12.10
 -10   2   3  504.45   11.90
  10  -2   3  519.45   14.00
 -10  -2  -3  495.95   11.80
  10   3   3    4.20    1.50
 -10  -3   3    2.10    1.80
 -10   3   3    3.70    1.70
 -10  -3  -3    1.90    2.00
  10   3  -3    3.90    1.50
  10   4   3   11.60    1.70
 -10  -4   3   11.50    1.70
 -10   4   3   12.90    2.00
 -10  -4  -3    9.40    2.20
  10   4  -3   13.40    1.80
  10   5   3   38.60    2.80
 -10  -5   3   36.50    2.40
  10   5  -3   32.90    2.70
 -10  -5  -3   26.90    2.70
  10   6   3    8.90    1.60
 -10  -6   3    5.50    1.20
  10   6  -3    6.30    1.50
 -10  -6  -3    5.30    1.30
  10   7   3   -2.10    1.50
 -10  -7   3    0.80    0.80
  10   7  -3    0.00    1.30
 -10  -7  -3    0.80    0.90
 -10  -8   3   47.60    1.90
 -10  -8  -3   44.70    2.00
 -10  -9   3    0.80    0.50
 -10  -9  -3    1.40    0.60
  11   0   3    0.80    1.40
  11   0   3   -1.90    4.40
 -11   0  -3   -1.70    1.20
  11   0  -3    0.50    1.40
 -11   0   3    1.40    1.20
  11   1   3   66.29    3.10
 -11  -1   3   63.39    2.90
  11  -1  -3   66.39    3.40
  11   1  -3   69.09    3.20
  11  -1   3   64.79    3.30
 -11   1   3   65.49    2.90
  11  -1   3   59.79    7.60
 -11  -1  -3   62.39    2.90
 -11  -2   3  158.38    4.60
  11   2   3  152.78    4.90
  11   2  -3  152.18    4.80
 -11   2   3  162.88    4.70
 -11  -2  -3  150.08    4.60
 -11  -3   3   53.89    3.00
  11   3   3   51.39    2.90
 -11   3   3   52.49    2.90
  11   3  -3   53.49    2.90
 -11  -3  -3   48.20    3.20
 -11  -4   3   16.60    2.60
  11   4   3   14.30    1.80
 -11   4   3   13.40    2.00
  11   4  -3   13.60    1.60
 -11   5  -3   17.30    1.80
  11   5   3   10.50    1.50
 -11  -5   3   12.80    2.00
 -11  -5  -3   14.60    1.80
 -11   5   3   14.60    1.90
  11   5  -3   12.00    1.60
 -11  -6   3   -0.20    0.90
  11   6   3   -0.10    1.30
  11   6  -3   -0.90    1.10
 -11  -6  -3    1.60    1.10
 -11  -7   3   25.40    1.70
 -11  -7  -3   22.70    1.80
 -11  -8   3   10.40    1.10
 -11  -8  -3   11.30    1.20
 -11  -9   3    2.70    0.50
 -11  -9  -3    2.30    0.60
  12   0  -3   -0.60    1.30
  12   0   3    0.20    1.30
 -12   0   3   -0.10    1.10
 -12   0  -3   -1.60    1.10
 -12  -1   3  129.69    4.00
  12  -1  -3  125.79    4.20
 -12   1  -3  130.89    4.00
  12   1   3  131.19    4.30
 -12  -1  -3  124.59    4.10
 -12   1   3  127.99    4.00
  12  -1   3  125.19    4.20
  12   1  -3  129.19    4.30
  12   2   3   93.49    3.70
 -12   2  -3  100.69    3.60
 -12  -2   3  101.49    3.50
  12   2  -3   96.99    3.70
 -12   2   3  101.89    3.50
 -12  -2  -3   97.69    3.50
 -12  -3   3    1.10    1.50
 -12   3  -3    4.30    1.30
  12   3   3    6.10    1.40
 -12  -3  -3    4.70    1.60
 -12   3   3    6.40    1.30
  12   3  -3    3.10    1.30
  12   4   3   34.30    2.40
 -12   4  -3   36.70    2.30
 -12   4   3   33.00    2.40
  12   4  -3   35.90    2.40
  12   5   3   44.60    2.50
 -12  -5   3   46.40    2.50
 -12   5  -3   45.70    2.60
 -12   5   3   44.30    2.70
 -12  -5  -3   43.20    2.80
  12   5  -3   44.10    2.50
 -12   6  -3   13.80    1.60
 -12  -6   3   12.70    1.60
  12   6   3   12.80    1.50
  12   6  -3   14.50    1.80
 -12   6   3   12.90    2.40
 -12  -6  -3   12.20    1.40
  12   7   3    6.70    1.20
 -12  -7   3    6.00    0.90
  12   7  -3    6.00    1.10
 -12  -7  -3    5.80    1.00
  12   8   3   19.60    1.90
 -12  -8   3   18.10    1.10
 -12  -8  -3   16.60    1.20
 -13   0  -3    0.70    1.00
  13   0   3    0.00    1.10
 -13   0   3    0.50    1.00
  13   0  -3    0.70    1.20
  13   1   3    0.60    1.20
 -13  -1   3    2.60    1.10
 -13   1  -3    3.80    1.20
 -13  -1  -3    1.20    1.10
  13   1  -3    0.90    1.20
 -13   1   3    2.00    1.10
 -13   2  -3   21.00    2.00
  13   2   3   17.00    2.10
 -13  -2   3   18.80    2.00
 -13   2   3   21.30    1.90
  13   2  -3   18.60    2.10
 -13  -2  -3   18.60    2.00
 -13   3  -3  104.59    3.60
  13   3   3  101.09    3.60
 -13  -3   3   99.99    3.60
 -13   3   3  101.59    3.50
  13   3  -3  106.39    3.70
 -13  -3  -3  105.29    3.70
 -13   4  -3    3.00    1.10
  13   4   3    3.00    1.10
 -13   4   3    3.90    1.20
  13   4  -3    3.50    1.10
  13   5   3   12.60    1.80
 -13   5  -3   13.00    1.40
 -13   5   3   15.10    1.80
  13   5  -3   11.30    1.30
 -13  -6   3   16.30    1.70
 -13   6  -3   15.50    2.10
 -13   6   3   14.30    1.50
 -13  -6  -3   14.60    2.00
  13   6  -3   16.10    2.00
 -13  -7   3    1.00    0.80
  13   7   3    3.40    1.00
 -13  -7  -3    1.50    0.90
  13   7  -3    3.00    0.90
  13   8   3    0.90    0.90
 -13  -8   3   -1.10    0.70
 -13  -8  -3    0.20    0.70
 -14   0  -3   -0.30    1.00
  14   0   3   -1.50    1.10
  14   0  -3   -0.10    1.10
 -14   0   3    0.00    1.00
 -14  -1   3   36.20    2.10
  14  -1  -3   35.80    2.40
 -14   1  -3   35.10    2.20
  14   1   3   34.90    2.30
 -14  -1  -3   38.30    2.20
 -14   1   3   37.10    2.20
  14  -1   3   32.70    2.50
  14   1  -3   33.50    2.20
 -14   2  -3   15.00    1.80
 -14  -2   3   13.40    1.80
  14   2   3   15.00    1.90
 -14   2   3   16.20    1.80
  14   2  -3   12.10    1.40
 -14  -2  -3   13.40    1.80
 -14  -3   3   42.40    2.40
  14   3   3   38.20    2.30
 -14   3  -3   39.40    2.20
 -14   3   3   40.90    2.20
 -14  -3  -3   41.50    2.50
  14   3  -3   40.40    2.30
  14   4   3   74.69    2.90
 -14   4  -3   77.39    2.80
 -14   4   3   79.89    2.90
  14   4  -3   79.19    2.90
 -14   5  -3   12.40    1.60
  14   5   3   15.40    1.70
 -14   5   3   13.70    1.40
  14   5  -3   14.30    1.60
 -14   6  -3   10.10    1.20
  14   6   3    8.40    1.10
 -14   6   3   10.90    1.20
  14   6  -3    9.40    1.30
  14   7   3    5.90    0.90
 -15   0   3    1.30    0.90
  15   0  -3   -1.20    1.00
 -15   0  -3    1.40    0.90
  15   0   3   -0.30    1.00
  15   1   3   11.40    1.40
 -15   1  -3   12.90    1.60
 -15  -1   3   13.90    1.60
 -15  -1  -3   12.50    1.60
  15   1  -3   10.60    1.30
 -15   1   3   11.90    1.60
  15  -1   3   12.40    1.50
 -15   2  -3    5.30    1.10
 -15  -2   3    7.70    1.10
  15   2   3    5.70    1.20
 -15   2   3    5.40    1.10
  15   2  -3    6.60    1.10
 -15  -2  -3    5.80    1.10
 -15  -3   3   35.10    2.20
 -15   3  -3   29.80    1.90
  15   3   3   30.20    2.00
  15   3  -3   33.70    2.00
 -15   3   3   28.90    1.90
  15   4   3    2.90    1.00
 -15   4  -3    0.60    0.80
 -15   4   3    1.50    0.90
  15   4  -3    1.20    0.90
 -15   5  -3   25.20    1.60
  15   5   3   22.70    1.60
 -15   5   3   23.40    1.60
  15   5  -3   24.80    1.60
  15   6   3    1.10    0.70
 -15   6  -3    4.60    0.90
 -15   6   3    3.20    0.90
  15   7   3    0.40    0.60
  16   0  -3    0.00    0.90
 -16   0  -3    0.20    0.80
 -16   0   3    0.20    0.80
  16   0   3   -0.10    1.00
  16   1   3    7.20    1.10
 -16  -1   3    8.20    1.10
 -16   1  -3    5.70    1.00
 -16   1   3    6.70    1.10
 -16  -1  -3    7.40    1.10
  16  -1   3    6.70    1.40
  16   1  -3    8.20    1.10
 -16  -2   3   21.40    1.70
 -16   2  -3   24.30    1.70
  16   2   3   20.60    1.70
  16   2  -3   23.40    1.70
 -16   2   3   23.40    1.70
 -16  -2  -3   24.40    1.70
  16   3   3    5.00    1.00
 -16   3  -3    4.40    1.00
  16   3  -3    5.70    1.00
 -16   3   3    4.40    1.00
  16   4   3   16.30    1.40
 -16   4  -3   16.70    1.40
  16   4  -3   13.60    1.30
 -16   4   3   16.20    1.40
 -16   5  -3   -0.40    0.70
  16   5   3    1.10    0.70
  16   5  -3    0.60    0.60
 -16   5   3    0.80    0.70
 -16   6  -3    5.70    1.10
  16   6   3    7.50    1.00
 -16   6   3    6.90    0.90
  17   0   3   -0.40    0.90
 -17   0   3   -0.60    1.10
  17   1   3   -0.10    0.80
 -17  -1   3    0.20    0.80
 -17   1  -3   -0.40    0.80
 -17  -1  -3    0.80    0.80
 -17   1   3    1.60    0.90
 -17  -2   3    3.40    0.90
  17   2   3    0.10    0.80
 -17   2  -3    1.50    0.80
 -17  -2  -3    2.90    0.90
 -17   2   3    2.60    0.80
  17   2  -3    1.70    0.80
  17   3   3   59.09    2.20
 -17   3  -3   61.79    2.10
  17   3  -3   58.19    2.00
 -17   3   3   60.79    2.10
 -17   4  -3   -0.20    0.60
  17   4   3    0.20    0.60
 -17   4   3   -0.30    0.60
  17   4  -3   -0.40    0.60
  17   5   3   -0.70    0.50
 -17   5  -3   -0.10    0.60
 -17   5   3    0.30    0.60
 -18   0  -3    1.00    0.70
  18   0   3    1.80    0.90
 -18  -1   3    5.80    0.80
  18   1   3    5.60    0.90
 -18   1  -3    4.90    0.80
 -18  -1  -3    6.50    0.80
 -18   1   3    5.00    0.70
 -18   2  -3    4.10    0.80
  18   2   3    5.30    0.80
 -18  -2   3    4.20    1.00
 -18   2   3    3.80    0.70
  18   3   3    6.60    0.80
 -18   3  -3    8.20    1.00
 -18   3   3    8.20    0.90
  18   4   3    4.10    0.60
 -18   4  -3    2.40    0.60
 -18   4   3    1.60    0.60
 -19   0   3    0.10    0.60
 -19   0  -3    0.40    0.60
 -19   1  -3    3.00    0.60
 -19  -1   3    3.30    0.70
 -19   1   3    3.00    0.60
 -19  -1  -3    5.30    1.00
  19   2   3    0.70    0.60
 -19   2  -3    0.60    0.50
 -19   2   3    0.50    0.50
  19   3   3    0.00    0.50
 -19   3  -3   -0.50    0.50
 -19   3   3    0.80    0.50
   0   0  -4 1080.99   23.00
   0   0   4 1053.39   23.00
   0  -1   4    0.40    0.40
   0  -1  -4    0.50    0.70
   0   1  -4    0.30    0.70
   0  -1   4    0.20    0.60
   0   1   4   -0.50    0.60
   0  -2   4    0.90    0.70
   0  -2  -4   -0.10    0.80
   0   2   4    2.20    0.80
   0  -2   4    0.90    0.40
   0   2  -4    0.50    0.80
   0  -3   4    1.70    0.80
   0   3   4    0.00    0.70
   0   3   4    0.00    1.00
   0  -3  -4    0.60    0.80
   0   3  -4    0.60    0.50
   0   4  -4  594.84   13.00
   0  -4   4  611.94   13.10
   0   4   4  590.24   12.90
   0  -4   4  594.34   13.10
   0   4   4  599.34   14.20
   0   5   4   -0.20    2.10
   0   5  -4   -0.10    1.20
   0  -6   4  229.58    6.30
   0  -6  -4  231.98    6.80
   0  -7  -4    1.50    1.40
   0  -7   4    1.20    1.10
   0  -8   4  138.69    4.10
   0  -8  -4  141.69    4.50
   0  -9   4   -0.40    0.80
   0  -9  -4    0.80    1.00
   0 -10   4    6.70    1.10
   0 -10  -4    8.10    1.20
   0 -11  -4   -0.90    0.70
   1   0   4  679.33   13.80
   1   0  -4  609.74   13.80
  -1   0  -4  586.34   13.70
  -1   0   4  602.04   13.80
  -1   1  -4   58.19    2.20
   1   1   4   57.49    2.20
  -1  -1   4   60.19    1.80
   1  -1  -4   55.99    2.30
   1   1   4   57.49    2.10
  -1  -1   4   59.89    2.30
  -1  -1  -4   58.09    2.20
  -1   1   4   62.09    2.20
   1  -1   4   58.29    2.20
   1   2   4   49.00    2.20
  -1  -2   4   51.39    2.10
  -1   2  -4   48.40    2.10
   1   2   4   49.50    2.00
  -1  -2   4   48.60    1.70
  -1   2   4   49.10    2.00
  -1  -2  -4   49.50    2.10
   1  -2   4   48.30    2.00
   1   2  -4   50.49    1.70
   1   3   4  483.75   11.50
  -1   3  -4  474.15   11.00
  -1  -3   4  483.65   10.90
   1   3   4  481.45   10.80
  -1  -3   4  494.45   10.80
   1   3  -4  480.55   10.60
   1  -3   4  488.65   10.80
  -1   3   4  480.75   10.70
  -1  -3  -4  471.45   10.90
  -1  -4   4   39.90    2.20
  -1  -4   4   43.30    1.90
   1   4   4   40.50    1.80
   1   4   4   38.00    2.80
   1   4  -4   41.90    1.90
   1  -4   4   42.30    1.70
  -1   4   4   39.90    2.90
   1   5   4    4.60    2.10
   1   5  -4    2.80    1.50
  -1   5   4    5.10    2.20
  -1  -6   4   76.09    3.20
   1  -6  -4   70.99    3.80
  -1  -6  -4   70.49    3.70
   1  -6   4   73.19    3.30
   1  -7  -4    1.00    1.50
  -1  -7   4    2.20    1.10
   1  -7   4    2.70    1.10
  -1  -7  -4    2.60    1.40
   1  -8  -4  142.49    4.50
  -1  -8   4  140.09    4.10
   1  -8   4  138.69    4.10
  -1  -8  -4  140.59    4.50
   1  -9  -4    2.60    1.10
  -1  -9   4   -0.40    0.70
  -1  -9  -4   -0.20    0.90
   1  -9   4   -0.10    0.80
  -1 -10   4    0.20    0.60
   1 -10  -4   -0.50    0.80
  -1 -10  -4    1.30    0.70
   1 -10   4   -0.20    0.70
  -1 -11   4    7.70    1.00
  -1 -11  -4    9.70    0.90
  -2   0   4   58.09    2.40
   2   0   4   57.99    1.90
   2   0   4   61.99    2.30
  -2   0  -4   60.49    2.40
  -2   1  -4 6641.84  141.39
  -2  -1  -4 6903.01  141.39
  -2   1   4 6742.73  141.39
   2   2   4    8.20    1.00
   2   2   4   11.20    1.30
  -2   2  -4   10.60    1.50
  -2  -2   4   10.00    1.10
  -2  -2   4   11.20    1.20
  -2  -2  -4   12.70    1.60
   2  -2   4   15.00    1.40
  -2   2   4   10.30    1.50
   2   2  -4   14.80    1.20
  -2   3  -4  107.89    3.40
  -2  -3   4  112.79    3.40
   2   3   4  107.99    3.30
  -2  -3   4  108.59    3.60
  -2  -3   4  112.09    3.50
   2   3   4  107.69    3.80
  -2   3   4  108.69    3.20
   2   3  -4  114.79    3.20
  -2  -3  -4  114.39    3.50
   2  -3   4  109.09    3.20
  -2  -4   4    0.60    1.20
   2   4   4    4.20    1.60
  -2  -4   4    5.20    1.40
  -2  -4   4    4.30    1.40
   2   4   4    3.90    1.00
   2   4  -4    3.70    1.10
   2  -4   4    5.70    0.90
  -2   4   4    4.60    0.80
  -2   4   4    4.10    0.70
  -2  -4  -4    4.80    1.20
   2   5   4  158.28    6.00
   2   5  -4  165.48    5.10
  -2   5   4  169.38    6.10
  -2  -6   4   21.80    2.20
   2  -6  -4   16.10    2.30
  -2  -6  -4   21.10    2.70
   2  -6   4   18.90    2.70
  -2  -7   4   70.59    2.90
   2  -7  -4   70.29    3.60
   2  -7   4   71.89    3.00
  -2  -7  -4   69.29    3.50
  -2  -8   4    4.90    1.00
   2  -8  -4    3.70    1.30
   2  -8   4    5.00    1.20
  -2  -8  -4    4.90    1.30
   2  -9  -4   16.40    1.80
  -2  -9   4   16.60    1.50
  -2  -9  -4   16.20    1.70
   2  -9   4   14.40    1.60
  -2 -10   4    3.30    0.70
  -2 -10  -4    3.60    0.80
  -2 -11   4    0.80    0.50
  -2 -11  -4    0.40    0.50
  -3   0  -4 1328.37   28.50
  -3   0   4 1325.87   28.30
  -3   0  -4 1319.97   28.10
   3   0   4 1294.07   28.00
   3   0   4 1323.37   28.50
   3   1   4  562.84   12.90
   3   1   4  564.14   13.00
  -3  -1   4  579.44   12.90
  -3   1  -4  584.24   13.10
   3  -1   4  578.44   12.30
  -3  -1  -4  584.54   13.00
   3  -1   4  575.74   13.00
  -3   1   4  576.14   13.20
  -3  -1  -4  571.84   13.20
   3   2   4  198.38    5.30
  -3   2  -4  197.08    5.30
  -3  -2   4  204.78    5.60
  -3  -2   4  202.88    5.20
  -3  -2   4  200.48    5.50
   3   2   4  202.58    5.40
   3   2  -4  196.18    5.10
  -3  -2  -4  194.08    5.40
  -3   2   4  195.48    5.30
   3  -2   4  203.78    5.20
   3   3   4  717.43   17.10
  -3  -3   4  736.33   16.60
  -3  -3   4  721.43   16.60
  -3   3  -4  734.13   16.40
   3   3   4  740.63   16.40
  -3  -3   4  752.02   16.50
  -3   3   4  713.83   16.30
  -3   3   4  730.53   16.20
  -3  -3  -4  749.03   16.60
   3  -3   4  745.33   16.30
   3   3  -4  740.23   16.30
   3   4   4   90.09    3.30
  -3  -4   4   84.79    3.80
   3   4   4   88.09    3.90
  -3   4  -4   92.59    3.40
  -3  -4   4   94.29    3.80
  -3  -4   4   93.19    3.50
   3  -4   4   92.89    3.00
   3   4  -4   93.29    3.40
  -3  -4  -4   92.89    3.60
  -3   4   4   92.99    3.10
  -3   4   4   93.09    2.80
   3   5   4  263.77    8.20
  -3   5   4  263.17    8.20
   3   5  -4  267.57    7.40
   3  -6  -4  161.08    6.00
  -3  -6   4  174.78    5.00
  -3  -6  -4  179.78    5.60
  -3  -7   4    2.80    1.10
   3  -7  -4    2.60    1.90
  -3  -7  -4    2.70    1.40
  -3  -8   4   29.90    1.90
   3  -8  -4   32.10    2.70
  -3  -8  -4   27.90    2.30
  -3  -9   4    7.10    1.00
  -3  -9  -4    5.80    1.00
  -3 -10   4    5.60    0.90
  -3 -10  -4    5.10    0.80
  -3 -11   4    0.70    0.50
  -3 -11  -4   -0.10    0.60
   4   0   4   45.20    1.80
  -4   0   4   44.00    2.10
   4   0   4   44.20    2.30
  -4   0  -4   46.20    2.00
  -4   0  -4   42.50    2.90
   4   1   4  165.28    4.60
  -4   1  -4  174.38    5.00
   4   1   4  175.08    4.90
  -4   1  -4  169.68    4.20
  -4  -1   4  173.88    4.70
  -4  -1   4  170.98    5.10
  -4   1   4  163.88    5.10
  -4  -1  -4  171.08    4.80
  -4  -1  -4  171.78    5.10
  -4   1   4  171.98    5.00
   4  -1   4  171.98    4.80
   4  -1   4  172.78    4.10
  -4  -2   4   17.70    2.30
   4   2   4   15.60    1.90
  -4  -2   4   15.40    1.80
  -4   2  -4   16.50    2.00
   4   2   4   14.40    1.80
   4  -2   4   15.70    1.70
  -4  -2  -4   14.80    1.70
  -4   2   4   14.30    2.00
   4   2  -4   16.30    1.60
  -4  -2  -4   15.80    2.20
  -4   2   4   18.50    2.00
  -4  -3   4  564.54   13.60
  -4  -3   4  559.94   13.50
   4   3   4  568.64   13.20
   4   3   4  581.84   13.60
  -4  -3   4  573.04   13.40
  -4   3  -4  580.44   13.20
  -4   3   4  556.24   13.20
  -4   3   4  579.24   13.10
   4   3  -4  575.04   13.10
   4  -3   4  577.64   13.10
  -4  -3  -4  568.64   13.50
  -4  -4   4   92.59    4.30
  -4  -4   4   87.09    3.90
  -4   4  -4   89.19    3.70
   4   4   4   89.89    4.20
   4   4   4   88.79    3.60
  -4   4   4   89.59    3.20
  -4  -4  -4   90.29    4.40
  -4   4   4   93.59    3.40
   4   4  -4   85.89    3.60
   4   5   4  150.78    4.60
  -4  -5   4  131.79    4.50
  -4  -5   4  142.49    6.90
   4   5   4  153.08    6.80
  -4  -5  -4  132.19    5.10
   4   5  -4  146.19    5.40
  -4  -6   4   17.50    2.00
  -4  -6  -4   19.30    2.50
  -4  -7   4    3.30    1.10
  -4  -7  -4    2.70    1.30
  -4  -8   4   29.20    1.90
  -4  -8  -4   27.90    2.20
  -4  -9   4    1.70    0.70
  -4  -9  -4    3.60    1.00
  -4 -10   4    2.10    0.60
  -4 -10  -4    1.90    0.70
  -5   0  -4  634.94   14.20
   5   0   4  623.64   14.10
  -5   0  -4  635.64   14.80
   5   0   4  625.54   14.60
  -5   0   4  644.24   14.50
  -5   0   4  634.34   14.90
  -5  -1   4  361.36    9.40
  -5  -1   4  363.96    9.00
   5   1   4  370.86    8.80
  -5   1  -4  363.46    8.40
   5   1   4  365.96    9.10
  -5   1  -4  367.76    9.30
  -5  -1  -4  367.36    9.40
  -5   1   4  365.96    8.90
   5   1  -4  365.46    8.90
   5  -1   4  356.66    9.00
   5  -1   4  366.36    8.30
  -5  -1  -4  366.76    9.00
  -5   2  -4  539.15   12.90
  -5  -2   4  521.25   13.10
  -5   2  -4  561.44   11.80
  -5  -2   4  539.15   12.70
   5   2   4  540.05   12.80
  -5  -2  -4  540.05   13.00
  -5  -2  -4  522.25   13.00
  -5   2   4  553.44   12.80
   5  -2   4  544.75   12.70
   5   2  -4  539.05   12.50
  -5   2   4  530.25   12.80
  -5   3  -4    3.80    1.60
   5   3   4    3.70    1.40
  -5  -3   4    3.10    1.80
   5   3   4    5.80    1.40
  -5  -3   4    5.40    2.20
   5  -3   4    4.10    1.30
  -5  -3  -4    4.90    2.30
   5   3  -4    2.00    1.30
  -5  -3  -4    1.40    2.00
  -5   3   4    1.30    1.60
  -5   3   4    4.40    1.50
  -5  -4   4   79.29    4.10
   5   4   4   72.19    4.20
   5   4   4   70.49    3.40
  -5  -4   4   69.59    4.70
  -5   4   4   78.19    4.40
   5   4  -4   67.49    3.60
   5  -4   4   75.99    3.40
  -5   4   4   65.39    3.50
  -5  -5   4   36.80    2.60
   5   5   4   35.30    3.60
  -5  -5  -4   35.10    3.20
   5   5  -4   40.10    4.50
  -5  -6   4  176.78    5.10
  -5  -6  -4  180.18    5.60
  -5  -7   4    0.80    0.90
  -5  -7  -4    0.40    1.10
  -5  -8   4    6.10    1.10
  -5  -8  -4    2.90    1.10
  -5  -9   4    5.60    0.90
  -5  -9  -4    3.60    0.90
  -5 -10   4    8.60    0.90
  -5 -10  -4    9.50    1.00
  -6   0  -4 1286.77   28.50
  -6   0   4 1272.27   28.50
  -6   0  -4 1258.57   27.90
  -6   0   4 1280.87   28.10
   6   0   4 1286.07   27.60
   6   0   4 1272.07   28.20
  -6   1  -4   55.39    2.60
   6   1   4   59.69    3.10
  -6  -1   4   59.99    4.00
  -6  -1   4   55.99    3.20
   6   1   4   62.09    2.70
  -6   1  -4   61.79    3.70
  -6   1   4   60.79    3.80
  -6  -1  -4   55.39    3.70
  -6   1   4   58.79    3.10
   6  -1   4   59.89    2.30
  -6  -1  -4   59.99    3.10
   6  -1   4   59.19    3.00
   6   2   4  337.67    9.10
  -6  -2   4  327.57    8.80
  -6   2  -4  335.67    7.80
  -6   2  -4  333.17    9.10
   6   2   4  345.97    8.60
  -6  -2   4  326.97    9.50
  -6   2   4  323.97    8.60
  -6  -2  -4  330.57    9.00
   6  -2   4  341.67    8.70
  -6  -2  -4  307.47    9.30
   6   2  -4  348.57    8.60
  -6   3  -4  199.08    6.70
   6   3   4  195.58    6.20
  -6  -3   4  206.48    6.90
   6   3   4  202.48    6.20
   6   3  -4  209.88    6.10
  -6   3   4  214.58    6.40
   6  -3   4  207.28    6.10
  -6   3   4  213.78    6.70
  -6   3   4  201.28    6.60
  -6  -3  -4  198.88    7.80
  -6  -4   4    3.00    2.30
   6   4   4    3.90    2.20
   6   4   4    0.30    1.90
   6   4  -4    3.80    2.10
  -6   4   4    3.80    1.80
  -6  -5   4   34.80    2.40
   6   5   4   31.10    4.50
  -6  -5  -4   33.50    3.10
  -6  -6   4  269.97    7.10
  -6  -6  -4  281.37    7.60
  -6  -7   4   33.00    2.10
  -6  -7  -4   29.50    2.40
  -6  -8   4    4.70    0.90
  -6  -8  -4    5.10    1.20
  -6  -9   4   28.80    2.50
  -6  -9  -4   25.50    2.90
  -6 -10   4    2.40    0.50
  -6 -10  -4    1.90    0.60
   7   0   4  385.96   10.10
  -7   0   4  391.66   10.00
  -7   0  -4  369.46   10.60
   7   0   4  379.56    9.30
  -7   0   4  376.06   10.70
  -7   0  -4  396.36    9.70
  -7  -1   4 1339.37   29.30
   7   1   4 1328.67   29.30
  -7   1  -4 1310.07   29.60
  -7  -1   4 1281.77   29.90
  -7   1  -4 1339.07   28.60
   7   1   4 1317.87   28.70
  -7  -1  -4 1201.88   29.60
  -7   1   4 1325.67   29.10
   7  -1   4 1346.47   29.20
  -7  -1  -4 1302.97   29.10
   7  -1   4 1313.07   28.30
  -7   1   4 1309.17   29.70
   7   2   4  123.69    4.80
  -7  -2   4  113.99    5.20
   7   2   4  117.59    4.40
  -7   2  -4  114.89    5.80
  -7   2  -4  118.49    4.00
  -7   2   4  110.89    5.00
   7  -2   4  120.69    4.70
   7   2  -4  129.69    4.50
  -7   2   4  121.89    5.80
  -7  -2  -4  126.69    5.80
   7   3   4   23.80    3.30
   7   3   4   26.50    3.40
  -7   3   4   27.50    3.70
   7   3  -4   23.90    2.60
   7  -3   4   28.50    3.40
   7   4   4   24.20    2.80
  -7  -4   4   23.00    2.80
  -7   4   4   20.50    2.70
   7   4  -4   21.60    3.00
  -7  -5   4   82.99    3.30
  -7  -5  -4   81.89    3.90
   7   5  -4   82.79    4.60
  -7  -6   4  117.99    3.90
  -7  -6  -4  120.09    4.40
  -7  -7   4    3.50    1.10
  -7  -7  -4    2.20    1.10
  -7  -8   4   10.20    1.30
  -7  -8  -4   10.80    1.60
  -7  -9   4    1.80    0.70
  -7  -9  -4    0.40    0.70
  -7 -10   4    2.90    0.50
  -7 -10  -4    2.70    0.60
   8   0   4  208.18    6.00
  -8   0   4  216.98    7.50
  -8   0  -4  207.08    6.80
   8   0   4  202.78    6.80
  -8   1  -4  182.38    8.40
  -8   1  -4  203.48    6.40
   8   1   4  205.78    6.00
   8   1   4  206.18    6.70
  -8   1   4  218.78    7.90
  -8  -1  -4  199.28    7.20
   8  -1   4  193.28    6.60
  -8   1   4  196.48    8.30
   8  -1   4  189.58    6.30
   8   2   4  381.56   10.10
  -8   2  -4  373.06   12.00
   8   2   4  383.96   10.60
  -8   2  -4  388.16    9.80
   8  -2   4  391.76   10.50
  -8   2   4  382.06   12.00
   8   2  -4  402.46   10.40
   8   3   4   56.39    4.70
   8  -3   4   61.19    4.70
   8   3  -4   59.39    4.60
  -8  -4   4   57.99    3.20
   8   4   4   63.79    4.10
  -8   4   4   55.09    5.60
   8   4  -4   56.59    3.90
  -8  -4  -4   55.09    4.00
  -8  -5   4    0.30    1.10
   8   5   4   -0.50    2.10
  -8  -5  -4    2.70    1.60
   8   5  -4    0.00    1.90
  -8  -6   4   35.80    2.20
  -8  -6  -4   36.50    2.60
   8   6  -4   40.10    4.90
  -8  -7   4   33.20    2.00
  -8  -7  -4   33.10    2.30
  -8  -8   4   13.40    1.40
  -8  -8  -4   13.20    1.60
  -8  -9   4    2.70    0.70
  -8  -9  -4    1.50    0.70
  -8 -10   4    3.50    0.50
  -8 -10  -4    3.90    0.60
   9   0   4  638.14   14.90
  -9   0  -4  616.74   16.00
   9   0   4  634.94   15.80
   9   1   4  269.77    7.80
  -9   1  -4  265.67    8.70
   9   1   4  275.57    8.60
   9  -1   4  278.47    8.60
   9  -1   4  267.57    7.50
   9   2   4   -0.80    1.70
   9   2   4    2.20    2.80
   9   2   4   -2.20    2.60
   9  -2   4    0.50    2.60
   9   2  -4   -0.30    1.70
   9   3   4   13.50    2.00
  -9   3   4   11.80    2.00
   9   3  -4   10.00    1.90
   9   4   4    7.50    1.90
  -9  -4   4    3.40    1.50
   9   4  -4    1.00    1.70
  -9   4   4    9.60    2.20
  -9  -4  -4    4.00    2.00
  -9  -5   4    2.40    1.20
   9   5   4    2.20    1.80
  -9  -5  -4   -1.30    1.40
   9   5  -4    3.50    1.70
  -9  -6   4   21.30    1.80
   9   6   4   24.10    3.00
   9   6  -4   21.70    2.00
  -9  -6  -4   22.50    2.10
  -9  -7   4   12.30    1.50
   9   7   4   18.60    3.00
  -9  -7  -4   11.00    1.40
   9   7  -4   11.10    1.80
  -9  -8   4   -0.20    0.70
  -9  -8  -4   -0.40    0.90
  -9  -9   4    2.40    0.60
  -9  -9  -4    2.70    0.70
  10   0   4    3.00    1.60
 -10   0   4    5.60    1.40
  10   0   4    5.40    2.60
  10   0   4    6.20    2.90
  10   0  -4    5.10    1.70
  10   1   4  134.29    7.00
  10   1   4  121.89    4.50
 -10  -1   4  130.79    4.20
  10  -1   4  124.69    6.60
 -10   1   4  127.09    4.20
  10   1  -4  134.59    4.50
  10  -1   4  127.39    4.70
  10   2   4   59.99    3.30
 -10  -2   4   61.79    3.00
 -10   2   4   59.59    3.10
 -10  -2  -4   60.59    3.10
  10  -2   4   66.79    6.60
  10   2  -4   59.89    3.20
 -10  -3   4    4.20    1.80
  10   3   4    3.30    1.60
 -10  -3  -4    6.50    2.00
  10   3  -4    3.30    1.50
 -10   3   4    7.00    1.60
 -10  -4   4    1.10    1.50
  10   4   4    0.60    1.50
 -10  -4  -4   -3.70    1.90
 -10   4   4    1.10    1.70
  10   4  -4    1.90    1.40
 -10  -5   4   35.70    2.30
  10   5   4   34.80    2.80
  10   5  -4   31.90    2.60
 -10  -5  -4   32.20    2.80
  10   6   4   18.90    2.40
 -10  -6   4   18.50    1.70
 -10  -6  -4   20.30    2.10
  10   6  -4   17.90    2.30
  10   7   4    5.90    1.50
 -10  -7   4    5.10    0.90
 -10  -7  -4    3.90    1.00
  10   7  -4    3.20    1.40
 -10  -8   4   20.60    1.30
 -10  -8  -4   21.50    1.50
 -10  -9   4   -0.10    0.50
 -10  -9  -4    0.30    0.60
  11   0   4  127.69    4.30
 -11   0   4  124.49    4.10
  11   0  -4  133.29    4.30
 -11  -1   4   68.19    3.00
  11   1   4   70.79    3.20
  11  -1  -4   73.99    3.30
  11  -1   4   56.39    5.70
  11  -1   4   67.99    3.30
  11   1  -4   69.19    3.20
 -11   1   4   70.69    3.00
 -11  -1  -4   67.79    2.90
 -11  -2   4  167.98    4.80
  11   2   4  164.28    5.10
 -11   2   4  168.68    4.90
  11   2  -4  169.08    5.10
 -11  -2  -4  170.58    4.90
  11   3   4   25.40    2.50
 -11  -3   4   22.90    2.60
 -11   3   4   26.20    2.40
 -11  -3  -4   21.70    2.90
  11   3  -4   24.80    2.40
 -11  -4   4   49.90    3.30
  11   4   4   53.49    2.90
  11   4  -4   52.69    2.90
 -11   4   4   53.59    3.00
  11   5   4   -0.80    1.20
 -11  -5   4    1.10    1.10
 -11   5   4   -0.10    1.50
  11   5  -4    0.80    1.30
 -11  -5  -4   -1.00    1.40
 -11  -6   4   -0.10    0.90
  11   6   4    0.40    1.20
  11   6  -4   -2.20    1.10
 -11  -6  -4   -1.00    1.10
 -11  -7   4   10.30    1.40
  11   7   4   10.30    1.50
  11   7  -4   11.80    1.40
 -11  -7  -4   10.60    1.50
 -11  -8   4    7.80    1.00
 -11  -8  -4    6.70    1.10
 -11  -9   4    2.50    0.50
 -11  -9  -4    1.50    0.50
  12   0  -4   -0.70    1.30
  12   0   4    3.30    1.40
 -12   0   4    1.70    1.10
 -12   0  -4    1.20    1.10
  12   1   4   10.10    1.50
  12  -1  -4    7.50    1.60
 -12  -1   4    7.90    1.30
  12  -1   4    8.10    1.50
 -12   1   4    6.40    1.30
  12   1  -4    8.20    1.50
 -12  -1  -4    6.90    1.30
 -12  -2   4  164.98    4.70
 -12  -2  -4  161.18    4.70
 -12   2   4  162.48    4.80
  12   3   4    8.00    1.40
 -12   3   4    5.30    1.30
 -12  -3  -4    8.70    1.70
  12   3  -4    6.10    1.40
 -12   4  -4  100.99    3.60
  12   4   4  103.19    3.70
  12   4  -4  108.09    3.80
 -12   4   4  100.99    3.60
 -12  -5   4   15.50    1.90
 -12   5  -4   13.10    1.50
  12   5   4   15.10    2.00
 -12   5   4   13.10    1.60
  12   5  -4   16.90    1.90
 -12  -5  -4   14.30    1.80
 -12   6  -4   74.39    3.10
  12   6   4   77.19    3.00
 -12  -6   4   78.39    2.70
  12   6  -4   76.59    2.90
 -12   6   4   77.69    3.20
 -12  -6  -4   79.89    3.00
  12   7   4    0.50    1.00
 -12  -7   4    1.70    0.70
 -12  -7  -4    3.00    0.90
  12   7  -4    2.00    0.90
  12   8   4    4.80    1.30
 -12  -8   4    2.70    0.60
 -12  -8  -4    3.00    0.70
  13   0   4   46.10    2.60
  13   0  -4   45.50    2.60
 -13   0  -4   44.00    2.40
 -13   0   4   46.70    2.40
 -13  -1   4    4.80    1.10
  13   1   4    4.60    1.30
 -13   1  -4    5.50    1.20
  13  -1  -4    6.20    1.40
 -13   1   4    4.60    1.10
  13  -1   4    2.30    1.30
  13   1  -4    7.00    1.30
 -13  -1  -4    4.70    1.20
 -13  -2   4   33.70    2.10
  13   2   4   35.30    2.40
 -13   2  -4   32.90    2.20
  13   2  -4   32.30    2.30
 -13   2   4   33.50    2.20
 -13  -2  -4   35.10    2.30
 -13  -3   4    0.90    1.30
  13   3   4    3.00    1.20
 -13   3  -4    3.30    1.10
 -13  -3  -4    3.10    1.50
 -13   3   4    4.00    1.10
  13   3  -4    2.70    1.10
  13   4   4   18.90    2.00
 -13   4  -4   19.20    1.90
  13   4  -4   21.40    1.90
 -13   4   4   18.50    1.90
 -13   5  -4   30.80    2.10
  13   5   4   25.40    2.00
 -13   5   4   30.50    2.20
  13   5  -4   28.10    1.90
  13   6   4   -0.30    1.00
 -13   6  -4   -0.90    1.10
 -13  -6   4   -1.90    1.00
  13   6  -4   -0.50    1.00
 -13  -6  -4   -0.10    1.20
 -13   6   4    1.60    1.20
 -13  -7   4   50.09    1.90
  13   7   4   53.79    2.20
 -13  -7  -4   53.79    2.00
  13   8   4    0.50    0.90
 -13  -8   4   -0.80    0.70
 -13  -8  -4    1.00    0.70
 -14   0  -4   10.30    1.20
 -14   0   4   13.20    1.70
  14   0  -4   10.30    1.30
  14   0   4   10.70    1.40
 -14  -1   4   20.80    1.80
 -14   1  -4   24.50    2.00
  14   1   4   21.80    2.00
  14  -1   4   24.90    2.30
  14   1  -4   25.40    2.00
 -14  -1  -4   22.10    1.90
 -14   1   4   20.30    1.90
 -14  -2   4   -1.00    0.90
 -14   2  -4   -0.60    1.00
  14   2   4   -0.20    1.00
 -14   2   4    0.20    0.90
  14   2  -4    0.10    1.00
 -14  -2  -4    2.50    1.10
 -14   3  -4   19.00    1.80
 -14  -3   4   17.60    2.20
  14   3   4   20.90    1.90
 -14  -3  -4   17.60    2.30
 -14   3   4   18.20    1.80
  14   3  -4   17.40    1.80
 -14   4  -4    1.20    1.00
  14   4   4   -0.40    1.00
 -14   4   4    0.90    0.90
  14   4  -4   -0.50    0.90
  14   5   4    4.80    1.10
  14   5  -4    2.90    0.90
  14   6   4    0.60    0.80
 -14   6  -4    1.40    1.00
 -14   6   4    2.00    1.00
  14   6  -4    1.20    0.70
  14   7   4    0.60    0.80
 -15   0  -4   93.79    3.10
 -15   0   4   86.49    3.10
  15   0  -4   87.89    3.00
  15   0   4   90.29    3.20
 -15   1  -4    0.10    0.80
 -15  -1   4   -0.40    0.80
  15   1   4   -0.20    0.90
 -15  -1  -4    0.80    0.90
  15   1  -4   -1.20    0.90
  15  -1   4    0.10    1.20
 -15   1   4    1.70    0.90
 -15   2  -4   14.20    1.60
  15   2   4   14.80    1.80
 -15  -2   4   17.20    1.60
 -15  -2  -4   17.00    1.70
  15   2  -4   16.10    1.70
 -15   2   4   17.50    1.70
 -15  -3   4    4.50    1.50
  15   3   4    3.70    1.00
 -15   3  -4    5.30    1.00
 -15   3   4    5.70    1.00
  15   3  -4    5.10    1.10
 -15   4  -4   38.60    2.00
  15   4   4   42.20    2.10
  15   4  -4   40.10    2.00
 -15   4   4   39.50    2.00
 -15   5  -4    1.10    0.80
  15   5   4    2.00    0.80
  15   5  -4    1.90    0.80
 -15   5   4    1.80    0.80
 -15   6  -4   16.10    1.40
  15   6   4   16.80    1.30
 -15   6   4   13.50    1.40
  15   7   4    0.80    0.90
  16   0   4   43.30    2.20
 -16   0   4   47.30    2.10
 -16   0  -4   47.40    2.10
 -16   1  -4   37.50    2.00
  16   1   4   35.90    2.00
 -16  -1   4   33.90    1.80
  16   1  -4   36.80    1.90
  16  -1   4   33.30    2.20
 -16  -1  -4   33.80    1.90
 -16   1   4   33.50    1.90
 -16   2  -4   17.00    1.60
  16   2   4   20.10    1.70
 -16  -2   4   20.70    1.60
  16   2  -4   21.10    1.60
 -16  -2  -4   23.20    1.70
 -16   2   4   19.80    1.60
  16   3   4    1.80    1.30
  16   3  -4    1.40    1.20
  16   4   4    6.90    1.00
 -16   4  -4    7.20    0.90
 -16   4   4    9.10    1.20
  16   4  -4    7.80    0.90
 -16   5  -4   10.20    1.20
  16   5   4   11.20    1.10
 -16   5   4   10.50    1.20
 -16   6  -4    1.10    0.70
  16   6   4   -0.40    0.50
 -16   6   4    1.50    0.80
 -17   0  -4    3.40    0.90
 -17   0   4    3.50    0.80
  17   1   4   -0.10    0.80
 -17  -1   4   -0.10    0.70
 -17   1  -4   -0.10    0.80
 -17  -1  -4   -0.10    0.80
 -17   1   4   -0.60    0.70
 -17   2  -4    8.90    1.20
  17   2   4    6.90    1.00
 -17  -2   4    9.60    1.00
 -17   2   4    7.70    1.00
 -17  -2  -4    8.20    1.00
  17   3   4    1.00    0.70
 -17   3  -4    1.20    0.70
 -17   3   4    0.60    0.60
  17   4   4    0.80    0.70
 -17   4  -4    0.20    0.60
 -17   4   4    1.40    0.70
  17   5   4    2.00    0.60
 -17   5  -4    3.10    0.60
 -17   5   4    2.00    0.60
 -18   0  -4   31.90    1.50
 -18   0   4   32.60    1.50
  18   0   4   31.70    1.70
 -18   1  -4    0.90    0.60
  18   1   4    2.80    0.80
 -18  -1   4    1.60    0.70
 -18  -1  -4    2.20    0.70
 -18   1   4    1.90    0.70
 -18  -2   4    0.30    1.20
  18   2   4    2.70    0.70
 -18   2  -4    0.40    0.60
 -18   2   4    1.60    0.60
  18   3   4    0.50    0.60
 -18   3  -4    0.60    0.60
 -18   3   4   -0.20    0.50
  18   4   4    3.50    0.60
 -18   4  -4    3.30    0.60
 -18   4   4    3.10    0.60
 -19   0   4   -0.10    0.50
 -19   0  -4    0.90    0.60
 -19  -1   4    7.30    1.00
 -19   1  -4    8.80    0.90
 -19   1   4    6.80    0.90
 -19  -1  -4    8.70    1.00
  19   2   4    0.90    0.70
 -19   2  -4    0.20    0.50
 -19   2   4    1.40    0.50
   0   0  -5    0.80    1.00
   0   0   5    0.20    0.90
   0   1   5    1.00    0.80
   0  -1  -5    0.60    0.90
   0  -1   5    0.50    0.80
   0   1  -5    0.30    0.90
   0   2   5 1997.30   42.30
   0   2  -5 1991.00   42.50
   0  -2   5 2001.30   42.40
   0  -2   5 1927.31   41.70
   0  -2  -5 2039.80   42.50
   0  -3  -5    0.40    1.10
   0   3   5    0.40    1.10
   0  -3   5   -1.30    0.90
   0   3   5   -1.10    0.70
   0   4   5   36.20    2.90
   0   4   5   35.50    1.90
   0   5   5    2.40    2.30
   0  -6  -5   16.90    2.10
   0  -6   5   17.40    2.10
   0  -7   5    0.90    1.10
   0  -7  -5   -1.50    1.30
   0  -8  -5    8.30    1.50
   0  -8   5    6.60    1.10
   0  -9   5    0.10    0.70
   0  -9  -5   -0.10    0.90
   0 -10  -5   59.69    2.10
   0 -10   5   58.09    2.00
  -1   0  -5   -0.50    0.80
   1   0  -5    0.30    0.90
   1   0   5   -0.20    0.80
  -1   0   5   -0.30    0.70
   1   1   5  758.82   16.90
  -1  -1   5  754.72   16.50
  -1   1  -5  771.72   17.10
  -1  -1   5  751.42   17.00
   1  -1  -5  760.72   17.10
  -1   1   5  788.52   17.00
  -1  -1  -5  771.82   17.00
   1   1  -5  771.62   17.20
   1  -1   5  769.82   17.00
   1   2   5 1127.49   24.10
   1   2   5 1090.79   23.80
  -1   2  -5 1099.89   24.00
  -1  -2   5 1068.69   23.40
  -1  -2   5 1082.39   23.90
   1  -2   5 1096.19   23.80
  -1  -2  -5 1086.39   23.90
  -1   2   5 1134.99   23.90
  -1  -3   5  241.28    5.70
   1   3   5  239.58    5.90
  -1  -3   5  235.78    6.00
  -1   3  -5  228.68    6.10
   1   3   5  230.88    6.50
  -1  -3  -5  228.08    6.10
  -1   3   5  238.48    5.90
   1   4   5   40.80    2.00
  -1  -4   5   38.00    2.70
   1   4   5   39.30    3.00
  -1   4   5   37.00    1.90
   1   4  -5   41.00    1.90
  -1   4   5   35.60    2.90
  -1  -4  -5   33.10    2.50
   1  -4   5   41.30    2.10
   1   5   5   11.50    2.60
  -1   5   5   10.40    2.70
  -1  -6   5   58.49    2.70
   1  -6  -5   57.09    3.60
   1  -6   5   57.49    2.90
  -1  -6  -5   61.79    3.50
  -1  -7   5    3.60    1.10
   1  -7  -5    2.50    1.50
   1  -7   5    1.80    1.20
  -1  -7  -5    4.70    1.70
   1  -8  -5   28.60    2.50
  -1  -8   5   30.90    1.90
   1  -8   5   28.40    1.90
  -1  -8  -5   30.10    2.40
   1  -9  -5   25.50    2.00
  -1  -9   5   26.00    1.60
  -1  -9  -5   25.20    1.90
   1  -9   5   23.00    1.60
   1 -10  -5   97.19    2.80
  -1 -10   5   97.79    2.70
  -1 -10  -5  101.99    2.90
   1 -10   5   91.29    2.70
  -1 -11   5    1.10    0.70
  -1 -11  -5    1.60    0.60
  -2   0   5    0.90    1.00
   2   0   5    0.30    0.80
  -2   0  -5   -0.90    0.90
   2   0   5    1.00    0.60
  -2  -1   5 1554.54   32.40
  -2   1  -5 1521.85   32.80
   2   1   5 1514.05   32.70
  -2  -1   5 1517.75   32.90
   2   1   5 1488.45   32.60
  -2   1   5 1575.54   32.90
   2  -1   5 1493.65   31.90
  -2  -1  -5 1530.45   32.80
   2  -1   5 1500.25   32.70
   2   2   5   16.10    1.70
   2   2   5   16.90    1.70
  -2  -2   5   12.10    1.70
  -2   2  -5   16.80    1.80
  -2  -2   5   13.30    1.30
  -2   2   5   11.60    1.70
  -2  -2  -5   15.80    1.90
   2  -2   5   13.60    1.60
   2   3   5    0.50    1.10
  -2  -3   5    1.70    1.00
   2   3   5    3.60    1.10
  -2   3  -5    1.10    1.10
  -2  -3   5    1.70    1.00
   2   3  -5    0.90    0.80
   2  -3   5    0.40    0.90
  -2  -3  -5    2.10    1.20
  -2   3   5    2.00    1.00
  -2  -4   5   -0.30    1.40
  -2   4  -5   -0.60    1.40
   2   4   5    0.50    1.40
  -2  -4   5   -2.40    1.60
  -2  -4   5    1.80    1.20
   2   4   5    0.40    1.10
  -2  -4  -5    0.40    1.50
  -2   4   5    2.80    1.10
  -2   4   5    0.60    0.90
   2   4  -5    0.70    1.10
   2  -4   5   -0.50    1.20
   2   5   5  122.49    5.60
   2   5   5  117.69    3.60
   2   5  -5  121.79    4.40
  -2   5   5  105.59    5.60
  -2  -6   5   32.70    2.30
   2  -6  -5   30.20    3.30
  -2  -6  -5   33.90    2.90
   2  -6   5   34.60    2.80
  -2  -7   5  109.59    3.90
   2  -7  -5  122.09    4.40
   2  -7   5  117.09    3.80
  -2  -7  -5  112.69    4.20
   2  -8  -5   51.89    2.80
  -2  -8   5   47.80    2.20
  -2  -8  -5   45.90    2.70
   2  -8   5   44.40    2.30
  -2  -9   5   60.69    2.30
   2  -9  -5   55.59    2.50
  -2  -9  -5   57.29    2.50
   2  -9   5   55.09    2.30
  -2 -10   5    3.90    0.70
  -2 -10  -5    2.70    0.80
  -2 -11   5    0.60    0.60
  -2 -11  -5    1.40    0.50
   3   0   5    0.40    0.60
   3   0   5    1.10    0.90
  -3   0   5    3.20    1.00
  -3   0   5    0.00    1.00
  -3  -1   5  100.29    3.50
  -3   1  -5   93.19    3.50
   3   1   5   95.79    3.30
  -3  -1   5   95.89    3.00
   3   1   5   96.99    3.10
   3  -1   5   97.39    2.50
  -3  -1  -5   90.99    3.50
  -3   1   5   95.49    3.40
   3  -1   5   93.69    3.30
  -3  -2   5 1309.17   28.90
   3   2   5 1353.26   29.20
  -3  -2   5 1325.97   29.40
  -3   2  -5 1342.77   29.30
   3   2   5 1326.57   29.30
   3  -2   5 1387.76   29.20
  -3  -2  -5 1333.67   29.30
  -3   2   5 1374.16   29.30
   3   3   5  511.75   12.00
  -3   3  -5  515.15   12.10
  -3  -3   5  511.15   12.40
  -3  -3   5  521.15   12.20
   3   3   5  515.05   12.40
   3   3  -5  531.25   11.80
   3  -3   5  520.15   11.90
  -3  -3  -5  497.95   12.20
  -3   3   5  499.35   11.80
  -3   3   5  512.75   11.90
  -3   4  -5  255.27    6.80
   3   4   5  257.97    7.40
  -3  -4   5  240.88    7.30
  -3  -4   5  255.07    6.90
  -3  -4   5  248.58    6.90
  -3  -4  -5  239.98    7.10
  -3   4   5  252.87    6.40
  -3   4   5  256.67    6.30
   3   4  -5  257.07    6.60
   3   5   5   10.50    2.80
  -3  -5   5   11.80    1.60
   3   5   5   13.50    1.70
   3   5  -5   11.70    2.50
  -3  -5  -5   12.10    2.20
  -3   5   5   14.80    2.90
  -3  -6   5  236.28    6.10
   3  -6  -5  213.78    7.00
  -3  -6  -5  231.68    6.70
  -3  -7   5    0.70    0.90
   3  -7  -5    1.80    1.80
  -3  -7  -5    0.80    1.30
   3  -8  -5   98.09    3.80
  -3  -8   5   97.79    3.30
  -3  -8  -5  100.39    3.70
  -3  -9   5   18.10    1.40
  -3  -9  -5   20.70    1.80
  -3 -10   5   11.80    1.00
  -3 -10  -5   14.10    1.20
   4   0   5    0.30    0.70
  -4   0  -5    0.20    0.80
  -4   0   5   -1.30    0.90
  -4   0  -5    1.50    1.20
   4   0   5   -0.70    0.90
  -4   1  -5 2447.26   55.29
  -4  -1   5 2550.74   54.69
  -4  -1   5 2613.54   54.89
   4   1   5 2556.64   54.39
   4   1   5 2558.24   54.69
   4  -1   5 2551.34   54.59
   4  -1   5 2502.25   53.69
  -4   1   5 2656.63   54.89
  -4  -1  -5 2541.15   54.79
  -4   1   5 2650.93   54.59
  -4  -2   5  108.29    3.70
  -4  -2   5  106.09    4.00
  -4  -2   5  107.89    4.30
   4   2   5  101.29    3.70
   4   2   5  105.49    3.80
  -4   2  -5  106.29    4.00
  -4   2   5  105.09    4.00
   4  -2   5  114.19    3.70
   4   2  -5  106.99    3.60
  -4   2   5  111.99    3.90
  -4  -2  -5  113.59    4.30
  -4  -3   5   -2.80    1.90
  -4  -3   5    0.10    1.30
   4   3   5    2.40    1.20
   4   3   5    0.30    1.40
  -4  -3   5    0.60    1.50
  -4   3  -5    1.60    1.40
   4   3  -5   -1.80    1.20
  -4   3   5    0.80    1.20
  -4  -3  -5    0.70    1.80
  -4   3   5   -1.70    1.40
   4  -3   5    0.30    1.10
   4   4   5   58.29    3.90
  -4  -4   5   66.49    4.10
  -4   4  -5   65.99    3.90
  -4  -4   5   61.59    3.70
   4   4   5   59.49    3.30
   4   4  -5   63.89    3.30
  -4   4   5   60.29    3.30
   4  -4   5   59.69    3.10
  -4   4   5   64.19    3.30
   4   5   5   72.89    3.70
  -4  -5   5   70.69    3.10
   4   5  -5   72.39    4.50
  -4  -5  -5   70.59    3.80
  -4  -6   5   45.80    2.40
  -4  -6  -5   49.00    3.10
  -4  -7   5  175.48    5.00
  -4  -7  -5  175.88    5.40
  -4  -8   5   54.59    2.30
  -4  -8  -5   54.79    2.70
  -4  -9   5   57.89    2.20
  -4  -9  -5   58.79    2.50
  -4 -10   5    2.20    0.60
  -4 -10  -5    2.30    0.70
   5   0   5    0.30    0.80
  -5   0  -5    2.40    1.50
  -5   0   5    0.90    1.10
  -5   0   5   -0.30    1.60
  -5   0  -5   -0.90    1.00
   5   0   5    0.50    1.10
   5   1   5  503.65   11.70
  -5   1  -5  508.85   11.20
   5   1   5  497.05   12.00
  -5   1  -5  501.65   12.30
  -5  -1   5  486.85   12.40
   5  -1   5  505.55   11.10
  -5   1   5  494.25   11.80
   5  -1   5  505.15   12.00
  -5  -1  -5  495.15   11.90
  -5   1   5  497.95   12.20
  -5  -1  -5  495.75   12.30
  -5  -2   5 1211.18   27.70
   5   2   5 1254.77   27.20
   5   2   5 1232.18   27.30
  -5  -2   5 1251.87   27.20
  -5  -2  -5 1239.78   27.50
  -5  -2  -5 1213.68   27.60
   5  -2   5 1250.87   27.20
  -5   2   5 1228.88   27.30
  -5   2   5 1197.68   27.30
  -5   2   5 1249.77   27.40
  -5   3  -5  414.26   10.80
   5   3   5  440.36   10.80
  -5  -3   5  419.36   10.80
  -5  -3   5  435.66   11.00
   5   3   5  432.06   10.70
  -5   3   5  412.66   10.70
  -5   3   5  422.86   10.60
   5  -3   5  427.76   10.40
   5   3  -5  427.96   10.40
  -5  -4   5  167.88    6.00
   5   4   5  172.58    5.50
   5   4   5  150.78    6.00
  -5  -4   5  157.68    6.50
   5   4  -5  168.48    5.40
  -5   4   5  151.98    5.20
  -5  -5   5   14.10    2.10
   5   5   5   19.60    2.50
  -5  -5  -5   16.70    2.20
   5   5  -5   13.80    3.30
  -5  -6   5    3.00    1.10
  -5  -6  -5    5.00    1.50
  -5  -7   5    1.80    0.90
  -5  -7  -5    1.50    1.20
  -5  -8   5   79.49    2.90
  -5  -8  -5   87.49    3.30
  -5  -9   5    5.10    0.80
  -5  -9  -5    6.10    1.10
  -5 -10   5    7.90    0.90
  -5 -10  -5    5.90    0.80
  -6   0  -5    0.10    1.40
  -6   0   5    2.20    1.90
   6   0   5    0.10    1.20
  -6   0   5    2.70    1.40
  -6   0  -5   -0.70    1.90
   6   0   5    0.60    0.90
   6   1   5   41.60    3.00
  -6   1  -5   44.30    2.40
  -6  -1   5   47.50    4.30
  -6   1  -5   43.40    3.90
   6  -1   5   42.40    2.00
  -6   1   5   43.30    3.00
  -6   1   5   40.50    3.90
  -6  -1  -5   45.80    3.10
   6  -1   5   43.90    3.00
  -6  -1  -5   38.20    4.00
   6   2   5  108.79    4.00
  -6   2  -5  105.79    3.10
   6   2   5  100.29    4.20
  -6   2  -5  102.49    5.00
  -6  -2   5  105.89    4.40
   6   2  -5  102.49    4.00
  -6   2   5  109.59    5.10
   6  -2   5  106.79    4.20
  -6   2   5  102.19    4.40
  -6  -2  -5  108.39    5.00
  -6  -3   5    5.30    2.60
  -6   3  -5    2.30    3.40
   6   3   5    5.20    1.70
   6   3   5    6.20    1.90
  -6  -3   5    8.70    2.10
  -6   3   5    5.70    1.80
   6   3  -5    3.40    1.70
  -6   3   5    3.70    2.60
  -6   3   5    4.60    2.50
   6  -3   5    7.90    1.80
   6   4   5  258.47    7.60
  -6  -4   5  264.67   11.00
   6   4  -5  252.27    7.70
  -6   4   5  243.28    7.40
   6   5   5  181.78    7.20
  -6  -5   5  199.58    5.50
  -6  -5  -5  198.98    6.10
  -6  -6   5   45.50    2.50
  -6  -6  -5   48.40    3.00
  -6  -7   5   86.09    3.10
  -6  -7  -5   85.69    3.50
  -6  -8   5    2.80    0.80
  -6  -8  -5    5.40    1.20
  -6  -9   5   20.40    1.30
  -6  -9  -5   20.60    1.60
  -6 -10   5    0.60    0.50
  -6 -10  -5    0.90    0.60
  -7   0   5    2.30    2.70
  -7   0  -5    2.20    1.80
  -7   0   5   -2.60    1.80
  -7   0  -5    2.30    2.60
   7   0   5   -0.10    1.20
   7   0   5    0.10    1.60
  -7  -1   5 1167.58   26.80
   7   1   5 1206.78   26.30
   7   1   5 1206.98   26.90
  -7   1  -5 1206.78   26.10
  -7   1  -5 1156.28   27.30
  -7   1   5 1182.78   27.40
   7  -1   5 1198.98   26.80
  -7  -1  -5 1158.78   26.70
  -7   1   5 1175.18   26.70
   7  -1   5 1220.68   25.70
   7   2   5  261.87    7.70
  -7  -2   5  254.07    8.10
  -7   2  -5  258.17    8.70
   7   2   5  260.47    7.30
  -7   2  -5  256.07    6.50
  -7   2   5  251.87    8.70
  -7   2   5  240.98    7.90
   7  -2   5  265.07    7.60
  -7  -2  -5  250.77    8.40
   7   3   5   32.90    3.90
   7   3   5   40.30    3.90
  -7   3   5   34.80    3.90
   7   3  -5   34.00    3.60
   7  -3   5   32.40    3.80
   7   4   5    1.10    2.60
  -7  -4   5    0.00    1.40
  -7  -4  -5   -1.40    2.00
  -7   4   5    1.40    2.60
   7   5   5  247.28    7.70
  -7  -5   5  264.47    6.70
   7   5  -5  247.88    7.30
  -7  -5  -5  259.27    7.30
  -7  -6   5    6.50    1.20
  -7  -6  -5    6.70    1.50
  -7  -7   5    7.00    1.10
  -7  -7  -5    4.90    1.30
  -7  -8   5   11.90    1.40
  -7  -8  -5   10.30    1.60
  -7  -9   5    2.10    0.60
  -7  -9  -5    0.90    0.70
  -7 -10   5    5.10    0.70
  -7 -10  -5    3.90    0.60
  -8   0  -5   -6.10    2.40
   8   0   5   -1.00    1.40
   8   0   5   -1.30    1.80
   8   1   5  169.18    5.40
   8   1   5  163.88    6.00
  -8   1  -5  161.58    5.70
  -8   1   5  152.58    8.30
  -8  -1  -5  148.69    6.90
   8  -1   5  163.18    6.10
   8  -1   5  166.18    5.00
   8   2   5   28.60    2.70
  -8   2  -5   26.30    4.70
   8   2   5   27.90    4.00
  -8   2   5   29.40    5.10
   8  -2   5   27.10    2.90
   8   3   5  111.69    5.90
   8   3  -5  124.69    5.20
  -8   3   5  113.49    6.10
   8   4   5   81.49    4.30
  -8  -4   5   82.89    3.50
   8   4  -5   92.49    4.10
  -8  -4  -5   91.29    4.30
  -8  -5   5   41.30    2.40
   8   5   5   44.20    3.60
  -8  -5  -5   40.30    3.10
   8   5  -5   41.50    3.40
  -8  -6   5   28.20    1.90
   8   6   5   26.50    2.60
  -8  -6  -5   24.20    2.40
   8   6  -5   32.80    3.00
  -8  -7   5   12.40    1.60
  -8  -7  -5   18.10    1.90
  -8  -8   5   17.70    1.40
  -8  -8  -5   18.90    1.60
  -8  -9   5    0.30    0.50
  -8  -9  -5    0.60    0.60
  -8 -10   5   13.50    0.90
  -8 -10  -5   14.70    0.90
  -9   0  -5   -4.30    3.60
   9   0   5   -3.50    2.00
   9   0   5   -5.30    2.20
  -9   1  -5   52.99    5.50
   9   1   5   47.50    4.80
   9   1   5   55.69    4.00
   9  -1   5   51.39    4.70
   9  -1   5   50.49    3.50
   9   2   5  101.89    6.00
   9   2   5   96.39    4.20
   9  -2   5  105.99    6.10
   9   2  -5   92.39    4.10
  -9   2   5  104.09    4.30
   9   3   5  135.99    4.70
  -9  -3   5  126.49    4.60
  -9   3   5  131.29    4.70
   9   3  -5  141.39    4.60
   9   4   5  149.29    4.90
  -9  -4   5  146.49    4.50
   9   4  -5  143.89    4.80
  -9  -4  -5  148.19    5.30
  -9   4   5  136.09    4.90
  -9  -5   5  108.89    3.90
   9   5   5  113.29    4.30
   9   5  -5  116.89    4.30
   9   6   5   42.90    3.10
  -9  -6   5   38.70    2.20
  -9  -6  -5   40.90    2.50
   9   6  -5   36.50    2.70
  -9  -7   5    6.20    1.00
   9   7   5    4.60    1.80
  -9  -7  -5    7.20    1.20
  -9  -8   5   18.30    2.00
  -9  -8  -5   19.60    1.80
  -9  -9   5    0.20    0.50
  -9  -9  -5    0.50    0.60
  10   0  -5   -1.90    1.50
  10   0   5    2.40    3.30
 -10   0   5   -1.30    1.30
  10   0   5   -1.10    1.60
  10   0   5   -4.60    2.80
  10   1   5    2.00    1.50
 -10  -1   5    1.40    1.20
  10   1   5   -1.60    3.50
  10  -1  -5   -1.40    1.70
  10  -1   5    0.40    1.70
  10   1  -5   -2.50    1.40
  10  -1   5   -3.20    3.40
 -10   1   5    2.30    1.30
  10   2   5   32.30    2.70
 -10  -2   5   29.10    2.50
 -10   2   5   30.00    2.60
 -10  -2  -5   33.10    2.60
  10   2  -5   29.10    2.80
 -10  -3   5   29.50    2.90
 -10  -3   5   22.00    2.40
  10   3   5   28.20    2.60
  10   3  -5   27.50    2.60
 -10   3   5   28.90    2.70
 -10  -3  -5   23.20    3.10
 -10  -4   5  140.69    4.40
  10   4   5  148.99    4.80
 -10  -4  -5  134.19    5.20
  10   4  -5  141.79    4.60
 -10   4   5  140.19    4.60
 -10  -5   5    0.60    1.10
  10   5   5    2.90    1.50
  10   5  -5    0.10    1.30
 -10  -5  -5    2.90    1.50
 -10   5   5    2.10    1.80
 -10  -6   5    4.20    1.00
  10   6   5    5.20    1.50
  10   6  -5    3.50    1.30
 -10  -6  -5    4.90    1.30
 -10  -7   5    0.80    0.80
  10   7   5    0.20    1.40
 -10  -7  -5   -0.40    0.90
 -10  -8   5    0.70    0.60
 -10  -8  -5   -0.30    0.70
 -10  -9   5    2.30    0.60
 -10  -9  -5    1.10    0.60
  11   0  -5    1.00    1.40
  11   0   5    0.80    1.30
 -11   0   5   -0.60    1.10
  11   1   5   57.49    3.00
 -11  -1   5   57.79    2.70
  11  -1  -5   57.19    3.00
  11   1  -5   59.79    3.00
 -11   1   5   61.59    2.80
  11  -1   5   55.99    3.10
 -11  -1  -5   61.99    2.80
  11   2   5   36.60    2.70
 -11  -2   5   33.90    2.30
  11   2  -5   35.20    2.60
 -11   2   5   33.90    2.40
  11  -2   5   30.90    3.20
 -11  -2  -5   32.90    2.40
  11   3   5  225.38    6.30
 -11  -3   5  221.18    6.00
 -11  -3  -5  215.48    6.10
  11   3  -5  224.38    6.20
 -11   3   5  223.68    6.00
  11   4   5   54.89    2.80
 -11  -4   5   49.80    2.80
 -11   4   5   53.19    2.90
  11   4  -5   49.10    2.80
  11   5   5   12.20    1.60
 -11  -5   5   11.70    1.80
 -11  -5  -5   10.90    1.70
 -11   5   5   12.10    1.70
  11   5  -5   12.50    1.50
 -11  -6   5   39.40    2.00
  11   6   5   34.00    2.40
 -11   6  -5   32.30    2.70
 -11  -6  -5   36.30    2.30
  11   6  -5   36.80    2.20
  11   7   5   13.70    1.50
 -11  -7   5   12.30    2.00
 -11  -7  -5   11.90    1.60
 -11  -8   5   13.80    1.10
 -11  -8  -5   15.40    1.20
 -11  -9   5    0.40    0.50
 -11  -9  -5    0.20    0.50
  12   0  -5    0.30    1.20
 -12   0   5   -0.80    1.00
  12   0   5    0.00    1.30
 -12   0  -5    0.00    1.10
  12   1   5   35.60    2.60
 -12  -1   5   37.40    2.30
  12  -1   5   45.70    2.70
  12   1  -5   42.30    2.50
 -12  -1  -5   41.70    2.40
 -12   1   5   39.10    2.40
 -12  -2   5   29.00    2.90
  12   2   5   34.00    2.50
 -12   2   5   35.30    2.30
 -12  -2  -5   33.80    2.30
  12   2  -5   33.40    2.40
  12   3   5   32.40    2.40
 -12  -3   5   28.70    2.50
  12   3  -5   30.80    2.30
 -12  -3  -5   28.20    2.70
 -12   3   5   28.40    2.30
  12   4   5  256.57    6.70
  12   4  -5  246.08    6.60
 -12   4   5  254.47    6.60
 -12   5  -5   66.09    2.80
  12   5   5   73.19    3.00
 -12  -5   5   69.49    2.70
 -12  -5  -5   69.69    3.20
 -12   5   5   65.49    2.90
  12   5  -5   65.29    2.80
  12   6   5   22.90    2.00
 -12  -6   5   19.20    1.60
 -12   6  -5   17.90    1.80
 -12  -6  -5   19.60    2.00
  12   6  -5   20.90    1.80
 -12  -7   5   13.30    1.30
  12   7   5   15.10    1.70
 -12  -7  -5   15.60    1.40
 -12  -8   5    7.80    1.00
  12   8   5    8.60    1.50
 -12  -8  -5    8.40    1.00
  13   0  -5    0.00    1.10
 -13   0  -5    0.00    1.00
 -13   0   5   -0.30    0.90
  13   0   5   -0.10    1.20
 -13  -1   5   35.50    2.10
  13   1   5   34.10    2.40
 -13   1  -5   31.70    2.10
  13  -1   5   31.10    2.40
  13   1  -5   30.50    2.30
 -13  -1  -5   36.30    2.20
 -13   1   5   31.80    2.10
 -13  -2   5   23.60    2.00
 -13   2  -5   27.30    2.10
  13   2   5   26.50    2.20
 -13   2   5   25.60    2.00
 -13  -2  -5   27.50    2.10
  13   2  -5   23.10    2.10
  13   3   5    1.30    1.10
 -13  -3   5    2.60    1.30
 -13   3  -5    0.70    1.00
 -13   3   5    2.10    1.00
  13   3  -5    1.50    1.10
 -13  -3  -5    2.60    1.50
  13   4   5   18.60    1.90
 -13   4  -5   18.10    1.80
 -13   4   5   18.00    1.90
  13   4  -5   22.10    1.90
  13   5   5    1.10    1.00
 -13   5  -5    1.20    1.10
 -13   5   5    3.20    1.10
  13   5  -5   -0.30    0.90
 -13   6  -5    2.30    1.10
  13   6   5   -0.30    1.00
 -13  -6   5   -1.30    1.00
  13   6  -5    0.80    0.80
 -13   6   5   -0.20    1.10
 -13  -6  -5    1.40    1.40
  13   7   5    1.20    0.90
 -13  -7   5    1.20    0.80
 -13  -7  -5    0.00    0.90
  13   8   5    8.40    1.00
 -13  -8   5    5.90    0.70
 -13  -8  -5    5.70    0.70
 -14   0   5   -1.80    0.90
 -14   0  -5    1.70    1.00
  14   0   5   -1.10    1.00
  14   0  -5    1.70    1.10
 -14   1  -5   44.90    2.30
 -14  -1   5   46.10    2.20
  14   1   5   42.60    2.40
 -14  -1  -5   44.50    2.20
  14  -1   5   42.50    2.60
  14   1  -5   43.80    2.30
 -14   1   5   43.40    2.30
  14   2   5  141.69    4.30
 -14  -2   5  142.39    4.10
 -14   2  -5  140.29    4.20
 -14  -2  -5  138.49    4.10
  14   2  -5  135.29    4.10
 -14   2   5  132.79    4.10
 -14   3  -5    5.10    1.10
  14   3   5    6.30    1.20
 -14  -3   5    5.70    1.40
  14   3  -5    6.10    1.20
 -14   3   5    6.20    1.20
 -14  -3  -5    9.90    1.60
 -14   4  -5    4.70    1.00
  14   4   5    4.10    1.10
 -14   4   5    5.80    1.00
  14   4  -5    4.10    1.00
  14   5   5   52.99    2.40
 -14   5  -5   54.89    2.30
  14   5  -5   55.89    2.20
 -14   5   5   54.59    2.30
  14   6   5    6.50    1.00
 -14   6  -5    7.40    1.10
 -14   6   5    7.70    1.10
  14   7   5    8.90    1.20
 -15   0   5    0.20    0.90
 -15   0  -5   -0.20    0.90
  15   0   5   -0.40    1.00
 -15  -1   5    1.20    0.90
 -15   1  -5    3.30    1.00
  15   1   5    3.40    1.10
  15  -1   5    4.00    1.30
 -15  -1  -5    3.10    1.00
 -15   1   5    3.70    1.00
  15   1  -5    3.70    1.00
 -15  -2   5    7.20    1.10
 -15   2  -5    8.10    1.20
  15   2   5    6.40    1.10
 -15  -2  -5    6.50    1.10
 -15   2   5    4.90    1.00
  15   2  -5    4.70    1.00
  15   3   5    7.40    1.10
 -15   3  -5    7.00    1.10
 -15   3   5    8.10    1.10
  15   3  -5    6.20    1.10
  15   4   5   15.20    1.60
  15   4  -5   15.00    1.40
  15   5   5    0.90    0.80
 -15   5  -5    2.90    0.80
 -15   5   5    2.50    0.80
  15   5  -5    2.40    0.70
 -15   6  -5    4.30    0.90
  15   6   5    4.30    0.80
 -15   6   5    4.00    0.90
  15   7   5    5.00    0.70
 -16   0   5    0.20    0.80
  16   0   5    0.20    1.00
 -16   0  -5    0.40    0.80
 -16  -1   5    1.60    0.90
 -16   1  -5   -0.10    0.80
  16   1   5    0.20    0.90
 -16  -1  -5    0.70    0.80
 -16   1   5    0.10    0.80
  16  -1   5   -1.50    1.70
 -16   2  -5   14.40    1.50
 -16  -2   5   11.30    1.60
  16   2   5   10.10    1.20
 -16  -2  -5   12.60    1.60
 -16   2   5   12.20    1.40
  16   2  -5   12.80    1.40
 -16   3  -5   10.10    1.30
  16   3   5   10.50    1.40
 -16   3   5   10.20    1.30
  16   3  -5   10.90    1.30
 -16   4  -5   13.50    1.30
  16   4   5   13.60    1.30
 -16   4   5   13.10    1.20
 -16   5  -5    1.90    0.70
  16   5   5    0.60    0.70
 -16   5   5    1.80    0.70
 -16   6  -5    3.60    0.70
  16   6   5    4.60    0.70
 -16   6   5    3.30    0.80
 -17   0  -5   -0.20    0.70
  17   0   5    1.60    0.90
 -17   0   5    0.10    0.70
 -17   1  -5    1.60    0.70
 -17  -1   5    0.10    0.70
  17   1   5    1.90    0.90
 -17   1   5    1.40    0.80
 -17  -1  -5    1.00    0.80
  17   2   5    0.20    0.70
 -17   2  -5    1.40    0.70
 -17  -2   5    0.60    0.80
 -17   2   5   -0.20    0.60
 -17  -2  -5    0.60    0.90
  17   3   5   13.70    1.20
 -17   3  -5   12.80    1.20
 -17   3   5   13.30    1.20
 -17   4  -5    0.50    0.60
  17   4   5   -0.10    0.60
 -17   4   5    0.70    0.60
 -17   5  -5    0.60    0.60
  17   5   5    1.20    0.50
 -17   5   5    0.90    0.60
  18   0   5    1.40    1.20
 -18   0  -5   -0.90    0.60
 -18   0   5    0.00    0.60
 -18   1  -5    2.20    0.70
  18   1   5    2.20    0.80
 -18  -1   5    1.90    0.70
 -18  -1  -5    2.30    0.70
 -18   1   5    3.40    0.60
 -18   2  -5    2.20    0.60
  18   2   5    1.70    0.70
 -18   2   5    2.80    0.60
  18   3   5    0.60    0.60
 -18   3  -5    1.30    0.60
 -18   3   5    1.10    0.50
  18   4   5    5.90    0.80
 -18   4  -5    3.50    0.60
 -18   4   5    3.50    0.60
 -19   0   5   -0.40    0.50
 -19   0  -5    1.20    0.60
 -19   1  -5    0.20    0.50
 -19  -1   5    0.30    0.70
 -19   1   5   -0.80    0.50
 -19  -1  -5   -0.30    0.70
 -19   2  -5    1.10    0.50
  19   2   5   -0.30    0.60
 -19   2   5    0.60    0.50
   0   0   6 5594.14  117.99
   0   0  -6 5652.43  118.19
   0   1   6    0.00    0.80
   0   1  -6    0.40    1.10
   0  -1  -6   -0.20    1.10
   0  -1   6    0.20    0.80
   0  -2   6   34.10    2.00
   0  -2   6   33.60    1.30
   0   2   6   36.70    2.10
   0  -2  -6   36.80    2.50
   0   2  -6   33.30    2.40
   0   3   6   -2.20    1.10
   0   3   6   -1.90    0.90
   0  -3  -6    1.70    1.40
   0  -3   6    0.60    1.00
   0   4   6  295.17    8.30
   0  -4   6  292.37    7.40
   0   4   6  293.87    7.20
   0   5   6    3.90    2.70
   0  -6  -6  291.07    8.10
   0  -6   6  297.17    7.40
   0  -7  -6    1.20    1.50
   0  -8  -6   14.50    2.10
   0  -8   6   15.10    1.60
   0  -9  -6   -1.20    0.90
   0  -9   6   -0.40    0.70
   0 -10  -6    3.70    0.80
   0 -10   6    4.70    0.80
  -1   0  -6 9999.00  209.78
  -1   1  -6   75.09    3.10
  -1  -1   6   73.59    2.40
   1  -1  -6   73.29    3.10
  -1  -1   6   70.89    2.90
   1   1   6   71.89    2.80
  -1   1   6   73.79    2.90
   1   1  -6   73.89    3.20
  -1  -1  -6   73.09    3.10
   1  -1   6   73.09    2.90
   1   2   6  988.40   21.40
  -1  -2   6  933.01   20.80
   1   2   6  958.30   21.60
  -1  -2   6  985.70   21.50
  -1   2  -6  978.20   21.60
   1  -2   6  968.40   21.40
  -1   2   6  996.00   21.40
  -1  -2  -6  965.70   21.60
  -1  -3   6    6.80    1.20
  -1   3  -6    6.20    1.50
   1   3   6    7.60    1.20
  -1  -3   6    8.80    1.00
   1   3   6    7.50    1.50
   1  -3   6    6.00    1.20
  -1   3   6    7.80    1.20
  -1  -3  -6    7.20    1.50
   1   4   6    4.10    1.80
   1   4   6    0.10    1.20
  -1  -4   6    0.30    1.50
   1  -4   6    1.30    1.30
  -1  -4  -6   -1.20    1.80
  -1   4   6    1.20    1.10
  -1   4   6    2.10    1.80
   1   5   6   77.49    5.20
   1   5   6   78.29    3.00
  -1   5   6   85.89    5.40
   1  -6  -6    5.00    1.90
  -1  -6   6    2.60    1.20
  -1  -6  -6    2.30    1.60
   1  -6   6    4.00    1.30
  -1  -7   6    9.30    1.30
  -1  -7  -6    8.70    1.60
   1  -7   6    8.30    1.30
   1  -8  -6    0.70    1.20
  -1  -8   6    0.70    0.80
   1  -8   6    0.50    0.90
  -1  -8  -6   -1.60    1.10
  -1  -9   6   34.50    1.70
   1  -9  -6   36.50    2.10
   1  -9   6   35.00    1.80
  -1  -9  -6   33.00    2.10
   1 -10  -6   13.50    1.40
  -1 -10   6   16.50    1.10
   1 -10   6   11.70    1.40
  -1 -10  -6   15.60    1.30
  -1 -11  -6    0.90    0.60
  -2   0   6 2511.35   53.39
   2   0   6 2414.96   52.69
  -2   0  -6 2518.15   53.39
   2   0   6 2560.04   53.29
   2   1   6   35.30    1.90
   2   1   6   36.60    2.20
  -2   1  -6   33.30    2.40
  -2  -1   6   35.90    1.80
  -2  -1   6   34.10    2.30
  -2   1   6   35.90    2.30
  -2  -1  -6   34.60    2.40
   2  -1   6   39.70    2.30
   2  -1   6   35.20    1.40
  -2   2  -6    1.10    1.10
   2   2   6   -0.10    0.90
   2   2   6   -0.30    1.10
  -2  -2   6    0.10    0.80
  -2  -2   6    1.40    1.00
   2  -2   6    0.70    0.90
  -2   2   6   -0.20    1.00
  -2  -2  -6    0.20    1.20
  -2   3  -6  118.39    4.30
   2   3   6  126.09    4.10
  -2  -3   6  129.69    4.20
   2   3   6  126.79    4.50
  -2  -3   6  127.09    3.80
   2  -3   6  125.79    4.00
  -2  -3  -6  124.09    4.50
  -2   3   6  128.39    4.00
   2   4   6  405.16   10.50
  -2   4  -6  405.96   10.00
  -2  -4   6  384.36   10.30
   2   4   6  377.86   10.10
  -2  -4   6  396.66    9.80
  -2  -4   6  404.46    9.60
  -2  -4  -6  381.26   10.00
   2  -4   6  400.06    9.60
  -2   4   6  420.06    9.40
   2   5   6   45.80    3.10
  -2  -5   6   43.90    2.60
  -2   5   6   54.59    4.80
  -2  -5  -6   39.80    3.50
   2  -6  -6   70.49    3.80
  -2  -6   6   69.39    2.90
   2  -6   6   65.29    3.10
  -2  -6  -6   67.79    3.60
  -2  -7   6  191.78    5.20
   2  -7   6  189.08    5.20
  -2  -7  -6  191.18    5.90
   2  -8  -6    3.30    1.40
  -2  -8   6    3.70    0.90
   2  -8   6    3.80    1.10
  -2  -8  -6    2.40    1.20
  -2  -9   6    7.50    1.20
  -2  -9  -6    6.90    1.20
   2  -9   6    6.40    1.10
  -2 -10   6    0.80    0.60
  -2 -10  -6    0.60    0.70
  -3   0   6 4181.58   86.79
   3   0   6 4032.30   86.49
  -3   0  -6 4310.87   86.79
  -3   0   6 4025.10   86.39
   3   0   6 3946.31   85.89
  -3  -1   6  335.67    8.70
   3   1   6  337.27    8.30
  -3  -1   6  345.47    8.20
   3   1   6  339.77    8.50
  -3  -1  -6  340.87    8.70
   3  -1   6  336.37    8.50
  -3   1   6  343.57    8.70
   3  -1   6  346.27    7.60
  -3   2  -6  195.18    5.80
   3   2   6  189.78    5.60
  -3  -2   6  190.98    5.70
  -3  -2   6  204.08    5.30
   3   2   6  198.48    5.60
   3  -2   6  191.38    5.50
  -3   2   6  196.78    5.70
  -3  -2  -6  191.08    5.90
  -3  -3   6   28.60    3.60
   3   3   6   33.30    2.50
  -3  -3   6   29.40    2.40
  -3   3  -6   30.50    3.00
  -3  -3   6   38.90    2.60
   3  -3   6   36.90    2.40
  -3   3   6   35.60    2.50
  -3  -3  -6   34.40    3.30
   3   4   6  490.95   11.90
  -3   4  -6  494.25   12.20
  -3  -4   6  515.35   12.10
   3   4   6  481.35   12.60
  -3  -4   6  516.35   12.10
   3  -4   6  502.05   11.80
  -3   4   6  487.65   11.70
   3   5   6    0.60    1.80
  -3  -5   6    4.20    1.30
  -3  -5  -6    3.60    1.90
  -3   5   6   10.70    3.40
   3  -6  -6  152.78    5.70
  -3  -6   6  167.08    4.70
  -3  -6  -6  160.98    5.40
  -3  -7   6   31.30    2.10
  -3  -7  -6   29.90    2.60
  -3  -8   6   24.10    1.70
   3  -8  -6   23.20    2.50
  -3  -8  -6   26.10    2.30
   3  -9  -6   38.30    2.70
  -3  -9   6   40.20    1.80
  -3  -9  -6   42.30    2.20
  -3 -10   6    8.20    0.90
  -3 -10  -6    6.70    1.10
  -4   0   6  111.59    4.20
  -4   0   6  109.59    3.70
   4   0   6  110.99    4.00
  -4   0  -6  111.79    4.30
   4   0   6  113.59    3.30
  -4   1  -6  609.34   14.70
   4   1   6  618.14   14.50
   4   1   6  620.44   14.10
  -4  -1   6  624.54   14.20
  -4  -1   6  622.74   14.70
   4  -1   6  619.84   13.50
  -4   1   6  625.34   14.60
   4  -1   6  640.74   14.50
  -4  -1  -6  602.14   14.70
   4   2   6   11.60    1.50
  -4  -2   6    9.40    1.60
  -4   2  -6   16.40    2.10
   4   2   6   11.90    1.50
  -4  -2   6    8.50    1.90
  -4  -2   6   12.70    1.60
  -4   2   6   16.00    1.80
  -4  -2  -6   13.60    2.00
   4  -2   6   13.40    1.60
  -4  -3   6  186.18    6.00
  -4   3  -6  179.48    6.00
  -4  -3   6  182.18    5.60
   4   3   6  186.78    5.60
   4   3   6  186.28    5.90
   4  -3   6  180.78    5.50
  -4   3   6  184.78    5.80
  -4  -4   6  355.56    9.70
  -4  -4   6  356.76    9.60
   4   4   6  368.26   10.00
   4   4   6  353.26    9.20
   4  -4   6  347.57    9.80
  -4   4   6  355.26    9.00
   4   4  -6  362.96    9.20
  -4  -5   6  160.78    4.80
   4   5   6  159.08    5.40
  -4  -5  -6  153.58    5.30
  -4  -6   6    2.40    1.00
  -4  -6  -6    3.10    1.50
  -4  -7   6    0.60    0.90
  -4  -7  -6    1.20    1.20
  -4  -8   6    7.30    1.10
  -4  -8  -6    8.30    1.40
  -4  -9   6   13.30    1.30
  -4  -9  -6    9.90    1.40
  -4 -10   6    1.20    0.50
  -4 -10  -6    1.10    0.70
  -5   0   6  324.77    8.90
  -5   0   6  333.97    8.60
   5   0   6  328.27    8.00
  -5   0  -6  338.07    9.10
   5   0   6  343.37    8.80
  -5  -1   6  197.18    5.90
   5   1   6  202.48    6.00
  -5   1  -6  200.48    6.40
   5   1   6  199.78    5.60
  -5  -1   6  197.58    6.60
  -5  -1   6  205.38    6.30
  -5   1   6  194.18    6.50
   5  -1   6  201.08    6.00
  -5   1   6  203.38    6.30
   5  -1   6  204.48    4.90
  -5   1   6  194.38    5.90
  -5  -1  -6  198.78    6.60
  -5  -2   6  533.65   12.80
   5   2   6  546.15   12.80
   5   2   6  545.75   13.00
  -5  -2   6  515.35   13.60
  -5   2  -6  531.75   13.20
  -5  -2   6  551.14   13.30
   5  -2   6  534.55   12.90
  -5   2   6  537.95   13.20
  -5  -2  -6  501.55   13.40
  -5   2   6  540.15   13.70
  -5  -3   6   31.30    3.50
   5   3   6   23.90    2.90
  -5  -3   6   31.30    3.40
  -5   3  -6   23.90    2.70
   5   3   6   24.30    2.70
  -5   3   6   24.80    3.00
   5  -3   6   23.70    2.90
  -5   3   6   27.20    2.70
   5   4   6   28.40    3.50
   5   4   6   16.90    2.90
  -5  -4   6   28.80    4.20
  -5  -4   6   20.80    3.50
  -5   4   6   21.60    2.30
   5   4  -6   20.00    2.50
  -5  -5   6   39.40    2.40
   5   5   6   35.00    3.30
  -5  -5  -6   44.80    3.10
  -5  -6   6    2.20    1.10
  -5  -6  -6   -0.40    1.40
  -5  -7   6   35.40    2.00
  -5  -7  -6   33.00    2.50
  -5  -8   6   49.70    2.20
  -5  -8  -6   50.39    2.60
  -5  -9   6   10.20    1.20
  -5  -9  -6    7.30    1.10
  -5 -10   6   13.00    1.00
  -5 -10  -6   14.90    1.10
  -6   0  -6   17.60    2.60
   6   0   6   16.70    1.80
  -6   0   6   17.90    2.10
  -6   0   6   18.10    3.00
   6   0   6   20.40    2.70
  -6   0  -6   18.20    2.00
   6   1   6   78.59    3.90
  -6  -1   6   77.59    4.00
  -6   1  -6   77.49    4.90
   6   1   6   77.09    3.30
  -6  -1   6   78.19    5.30
  -6   1   6   77.49    5.00
  -6  -1  -6   73.79    5.30
  -6  -1  -6   76.29    4.10
  -6   1   6   78.59    3.80
   6  -1   6   86.79    2.70
  -6   1   6   78.39    4.10
   6  -1   6   74.89    3.80
  -6   2  -6   51.39    4.80
   6   2   6   52.89    3.10
  -6  -2   6   54.49    3.70
  -6  -2   6   52.99    3.90
   6   2   6   54.19    3.40
  -6   2   6   50.99    4.80
   6  -2   6   56.09    3.50
  -6   2   6   48.10    4.00
  -6   2   6   51.39    3.70
   6   3   6  168.18    6.00
  -6  -3   6  174.98    6.40
  -6   3  -6  162.78   10.10
   6   3   6  170.18    5.90
  -6  -3   6  158.28    6.70
   6  -3   6  175.38    5.90
  -6   3   6  167.78    6.00
   6   4   6   14.40    2.50
  -6  -4   6   14.60    2.30
  -6   4   6   13.40    2.50
  -6  -4  -6   12.00    2.10
   6   4  -6   12.60    3.00
  -6  -5   6    1.70    1.20
   6   5  -6    2.70    2.40
  -6  -5  -6   -0.40    1.50
  -6  -6   6    1.00    1.00
  -6  -6  -6    0.90    1.40
  -6  -7   6    3.60    0.90
  -6  -7  -6    3.30    1.30
  -6  -8   6    0.60    0.70
  -6  -8  -6    0.80    0.90
  -6  -9   6   23.00    1.30
  -6  -9  -6   21.20    1.60
  -6 -10   6    2.20    0.50
  -6 -10  -6    0.70    0.50
  -7   0   6  453.15   13.70
  -7   0  -6  397.46   10.20
   7   0   6  327.67   11.10
   7   0   6  400.66   10.60
  -7   1  -6  294.67    7.80
  -7  -1   6  278.27    8.70
  -7   1  -6  281.37    9.70
   7   1   6  291.27    7.70
   7   1   6  283.47    8.30
  -7  -1  -6  275.77    8.60
  -7   1   6  279.67    9.70
  -7   1   6  337.97   10.20
   7  -1   6  286.97    8.40
   7  -1   6  299.57    7.20
   7   2   6   61.99    3.80
  -7  -2   6   59.09    4.50
   7   2   6   60.69    4.00
  -7   2  -6   49.50    6.10
   7  -2   6   62.59    4.20
  -7   2   6   58.49    6.50
  -7   2   6   65.99    4.20
  -7  -3   6   10.10    3.70
   7   3   6    4.70    2.70
   7   3   6    9.50    2.40
   7  -3   6   11.10    2.60
  -7   3   6   12.50    2.50
   7   4   6   -0.50    2.20
  -7  -4   6    0.20    1.20
  -7   4   6    4.30    3.00
   7   4  -6    5.00    2.10
  -7  -4  -6    1.80    1.90
  -7  -5   6    0.20    1.00
   7   5   6    1.10    2.30
  -7  -5  -6   -0.80    1.50
   7   5  -6    3.30    1.90
  -7  -6   6   40.00    2.20
  -7  -6  -6   41.90    2.80
   7   6  -6   36.80    4.00
  -7  -7   6   62.19    2.50
  -7  -7  -6   64.09    3.10
  -7  -8   6  171.08    4.60
  -7  -8  -6  173.08    5.00
  -7  -9   6   17.00    1.10
  -7  -9  -6   17.60    1.40
  -7 -10   6    2.70    0.50
  -7 -10  -6    1.90    0.50
   8   0   6    2.80    2.20
   8   0   6    2.80    1.60
  -8   0  -6    1.90    2.80
   8   1   6   63.69    4.50
   8   1   6   58.49    3.50
  -8   1  -6   58.79    4.60
   8  -1   6   56.79    4.40
   8  -1   6   64.09    3.20
   8   2   6   12.00    2.60
   8   2   6   14.00    2.70
  -8   2   6   10.10    2.80
   8  -2   6    9.30    3.10
   8   3   6  161.98    7.20
   8   3   6  144.69    5.20
  -8  -3   6  156.38    7.60
  -8   3   6  167.38    7.20
   8   3  -6  146.89    5.10
   8   4   6   48.70    3.50
  -8  -4   6   48.20    2.70
   8   4  -6   52.79    3.30
  -8   4   6   52.99    4.10
  -8  -4  -6   41.90    3.60
   8   5   6   19.90    2.30
  -8  -5   6   22.10    2.10
  -8  -5  -6   19.80    2.70
   8   5  -6   19.80    2.00
   8   6   6  102.19    4.30
  -8  -6   6   99.19    3.30
   8   6  -6   93.39    3.80
  -8  -6  -6   95.79    3.80
  -8  -7   6   23.20    1.70
  -8  -7  -6   24.50    2.10
  -8  -8   6   40.10    1.80
  -8  -8  -6   39.00    2.10
  -8  -9   6    4.90    0.70
  -8  -9  -6    5.40    0.80
   9   0   6   71.69    4.40
   9   0   6   78.19    5.50
   9   0   6   79.39    4.90
  -9   0   6   72.49    3.30
  -9  -1   6   61.49    3.10
   9   1   6   64.69    5.40
   9   1   6   66.89    4.60
   9   1   6   59.49    3.50
  -9   1   6   56.69    3.10
   9   1  -6   60.09    3.30
   9  -1   6   67.19    3.90
   9  -1   6   70.09    5.30
   9   2   6  624.74   14.30
  -9  -2   6  596.34   14.00
   9   2  -6  631.74   14.20
   9  -2   6  620.64   16.10
  -9   2   6  594.44   14.10
  -9  -3   6  145.29    4.90
  -9  -3   6  153.98    4.80
   9   3   6  150.88    5.00
  -9   3   6  151.38    4.90
  -9  -3  -6  137.49    7.30
   9   3  -6  158.48    4.90
   9   4   6   77.19    3.80
  -9  -4   6   87.99    3.30
   9   4  -6   84.69    3.60
  -9   4   6   87.19    3.90
  -9  -4  -6   81.69    4.20
   9   5   6  133.29    4.70
  -9  -5   6  139.09    4.20
   9   5  -6  130.39    4.40
  -9  -5  -6  137.69    4.70
   9   6   6  445.66   10.90
  -9  -6   6  458.95   10.60
   9   6  -6  452.65   10.70
  -9  -6  -6  457.65   11.00
  -9  -7   6   10.70    1.40
   9   7   6   12.60    1.90
  -9  -7  -6   12.60    1.70
  -9  -8   6   21.60    1.40
  -9  -8  -6   23.30    1.70
  -9  -9   6    0.80    0.50
  -9  -9  -6   -0.30    0.60
  10   0   6   85.89    7.10
  10   0  -6   89.09    3.50
  10   0   6   93.39    3.80
  10   0   6   86.39    5.70
 -10   0   6   81.79    3.30
  10   1   6   25.40    2.60
 -10  -1   6   20.90    2.20
  10   1  -6   23.60    2.60
 -10   1   6   28.90    2.40
  10  -1   6   25.60    2.90
  10  -1   6   27.60    4.30
  10   2   6  159.78    5.00
 -10  -2   6  167.78    4.80
 -10  -2  -6  169.08    4.80
 -10   2   6  161.48    4.90
  10  -2   6  154.08    5.40
  10   2  -6  156.38    4.90
 -10  -3   6   92.19    3.90
  10   3   6   97.99    3.70
 -10  -3   6   97.49    3.70
  10   3  -6   89.89    3.60
 -10  -3  -6   91.19    3.90
 -10   3   6   88.09    3.50
 -10  -4   6   24.90    2.30
 -10   4   6   28.60    2.70
 -10  -4  -6   24.90    3.40
  10   4  -6   26.20    3.40
  10   5   6  103.69    3.90
 -10  -5   6  106.69    3.50
 -10   5   6  101.39    4.10
  10   5  -6  106.29    3.70
 -10  -5  -6  108.19    4.10
  10   6   6   32.80    2.50
 -10  -6   6   38.10    2.00
 -10  -6  -6   38.30    2.40
  10   6  -6   36.20    2.30
  10   7   6    6.10    1.70
 -10  -7   6    4.60    0.90
 -10  -7  -6    3.50    1.00
 -10  -8   6   21.80    1.30
 -10  -8  -6   22.30    1.40
 -10  -9   6    5.70    0.80
  11   0   6   57.09    3.00
  11   0  -6   56.29    2.90
 -11   0   6   61.49    2.70
  11   1   6   47.90    3.00
 -11  -1   6   54.89    2.60
 -11   1   6   52.09    2.60
  11   1  -6   54.99    2.80
  11  -1   6   52.89    3.00
  11   2   6   20.00    2.40
 -11  -2   6   20.60    2.10
 -11  -2  -6   15.00    1.60
  11  -2   6   15.30    2.20
  11   2  -6   20.10    2.20
 -11   2   6   16.20    2.10
  11   3   6   25.00    2.40
 -11  -3   6   26.10    2.50
  11   3  -6   29.70    2.30
 -11   3   6   22.20    3.10
 -11  -3  -6   25.50    2.80
 -11  -4   6   10.90    1.60
  11   4   6    7.90    1.40
 -11  -4  -6    7.00    2.80
  11   4  -6    9.70    1.40
 -11   4   6   10.80    1.60
  11   5   6  129.29    4.20
 -11  -5   6  129.49    3.90
  11   5  -6  130.89    4.00
 -11   5   6  129.49    4.20
 -11  -5  -6  133.39    4.40
 -11   6  -6  111.79    3.90
  11   6   6  123.89    3.90
 -11  -6   6  120.49    3.50
 -11  -6  -6  124.99    3.90
  11   6  -6  115.69    3.60
  11   7   6   19.70    2.00
 -11  -7   6   20.20    1.50
 -11  -7  -6   19.90    1.60
 -11  -8   6   14.00    1.00
 -11  -8  -6   15.00    1.20
 -11  -9  -6    2.10    0.50
  12   0  -6  124.49    4.00
  12   0   6  117.29    4.00
  12   1   6   43.10    2.60
  12   1  -6   47.50    2.80
 -12   1   6   41.40    2.40
  12  -1   6   40.80    2.80
  12   2   6   12.20    1.60
 -12  -2   6   14.60    1.90
  12   2  -6   12.40    1.50
 -12  -2  -6   11.90    1.50
 -12   2   6   10.90    1.40
 -12  -3   6   -1.90    1.40
  12   3   6    1.50    1.10
 -12  -3  -6    1.20    1.60
  12   3  -6    2.40    1.10
 -12   3   6    0.50    1.10
  12   4   6    0.90    1.10
  12   4  -6   -0.20    1.00
 -12   4   6   -1.00    1.10
  12   5   6    1.70    1.10
 -12  -5  -6   -0.80    1.50
 -12   5   6   -0.30    1.20
  12   5  -6   -0.10    0.90
 -12   6  -6    0.40    1.30
 -12  -6   6    0.20    0.90
  12   6   6    0.70    1.00
 -12   6   6    1.10    1.40
  12   7   6    5.10    1.10
 -12  -7   6    5.40    0.80
 -12  -7  -6    5.10    0.90
  12   8   6   -0.40    1.20
 -12  -8   6   -1.00    0.60
 -12  -8  -6    1.60    0.70
 -13   0  -6   25.60    2.00
 -13   0   6   28.40    2.00
  13   0   6   31.00    2.30
 -13  -1   6   -0.40    0.90
  13   1   6    0.80    1.10
 -13   1   6    0.10    1.00
  13  -1   6   -0.30    1.30
 -13  -1  -6    0.00    1.00
  13   1  -6    0.50    1.10
 -13  -2   6    8.10    1.20
  13   2   6    7.70    1.40
 -13   2   6    7.10    1.20
 -13  -2  -6    9.30    1.30
  13   2  -6    8.20    1.30
  13   3   6    9.60    1.40
 -13  -3   6   10.50    1.50
 -13   3   6   12.50    1.70
  13   3  -6    9.20    1.30
 -13  -3  -6    9.40    1.60
 -13   4  -6   10.50    1.30
  13   4   6   13.20    1.80
  13   4  -6   10.90    1.30
 -13   4   6   11.20    1.30
  13   5   6   -1.20    0.90
 -13   5  -6    0.80    1.00
 -13  -5   6   -2.30    1.60
  13   5  -6    0.80    0.90
 -13   5   6    0.40    1.00
 -13   6  -6    6.30    1.10
  13   6   6    5.50    1.10
 -13  -6   6    3.60    1.10
 -13   6   6    5.70    1.30
  13   7   6   13.40    1.40
 -13  -7   6   13.00    1.20
 -13  -7  -6   13.00    1.40
  13   8   6   13.40    1.40
 -13  -8   6   16.00    0.90
  14   0   6    8.70    1.30
 -14   0   6   13.80    1.60
 -14   0  -6   13.10    1.70
  14   1   6    3.40    1.10
 -14  -1   6    3.80    1.00
 -14   1  -6    3.80    1.00
 -14   1   6    2.50    1.00
  14  -1   6    3.10    1.20
 -14  -1  -6    2.40    1.00
  14   1  -6    2.30    1.00
 -14  -2   6    9.40    1.20
 -14   2  -6   12.70    1.70
  14   2   6   11.60    1.40
 -14   2   6    7.10    1.20
 -14  -2  -6   10.20    1.30
  14   2  -6    9.80    1.30
  14   3   6   75.39    2.90
 -14   3  -6   76.29    2.80
 -14  -3   6   73.89    2.90
  14   3  -6   73.59    2.80
 -14   3   6   75.09    2.80
  14   4   6    1.40    1.00
 -14   4  -6    1.50    0.90
  14   4  -6   -0.50    0.80
 -14   4   6   -0.80    0.90
  14   5   6   23.90    1.80
 -14   5  -6   24.40    1.70
 -14   5   6   25.00    1.80
  14   6   6    3.40    0.90
 -14   6  -6    3.80    0.90
 -14   6   6    2.30    0.90
  14   7   6   -0.20    0.70
 -15   0   6   37.80    2.00
  15   0   6   40.30    2.20
 -15   0  -6   40.80    2.10
 -15  -1   6   12.00    1.50
 -15   1  -6   11.80    1.60
  15   1   6    9.00    1.20
 -15  -1  -6    9.70    1.20
 -15   1   6   10.50    1.20
  15  -1   6   10.70    1.50
  15   2   6   23.20    1.90
 -15   2  -6   22.70    1.70
 -15  -2   6   20.50    1.70
  15   2  -6   22.70    1.60
 -15  -2  -6   20.00    1.70
 -15   2   6   21.00    1.70
  15   3   6   14.50    1.60
 -15   3  -6   17.00    1.50
  15   3  -6   14.50    1.50
 -15   3   6   16.70    1.50
 -15   4  -6    0.40    0.80
  15   4   6   -0.10    1.10
 -15   4   6    1.30    0.90
 -15   5  -6    1.40    0.80
  15   5   6   -0.20    0.70
 -15   5   6    0.20    0.70
 -15   6  -6   24.60    1.50
  15   6   6   25.80    1.40
 -15   6   6   23.20    1.50
 -16   0  -6    0.70    0.80
 -16   0   6   -0.30    0.80
  16   0   6   -1.20    1.00
 -16   1  -6    4.70    1.00
 -16  -1   6    3.30    0.90
  16   1   6    4.50    1.00
 -16   1   6    3.80    0.90
  16  -1   6    5.20    1.40
 -16  -1  -6    3.40    0.90
  16   2   6    1.40    0.90
 -16   2  -6   -0.20    0.70
 -16  -2   6    0.60    0.90
 -16  -2  -6    2.00    1.00
 -16   2   6    0.60    0.70
 -16   3  -6    5.20    0.90
  16   3   6    4.40    0.90
 -16   3   6    4.90    0.90
  16   4   6    0.40    0.70
 -16   4  -6    0.90    0.70
 -16   4   6    1.00    0.70
  16   5   6    2.40    0.70
 -16   5  -6    0.60    0.60
 -16   5   6    1.30    0.70
  16   6   6    0.90    0.50
 -16   6  -6    1.40    0.70
 -16   6   6    0.80    0.70
 -17   0   6   29.30    1.50
  17   0   6   27.90    1.70
 -17   0  -6   29.80    1.50
 -17  -1   6    8.60    1.20
  17   1   6   10.90    1.30
 -17   1  -6   10.60    1.20
 -17  -1  -6   11.00    1.20
 -17   1   6   10.60    1.20
 -17   2  -6   45.70    1.80
  17   2   6   43.10    1.80
 -17  -2   6   43.50    1.80
 -17  -2  -6   42.20    1.90
 -17   2   6   44.10    1.80
 -17   3  -6   15.30    1.20
  17   3   6   13.10    1.20
 -17   3   6   15.70    1.10
  17   4   6    1.80    0.60
 -17   4  -6    2.40    0.60
 -17   4   6    2.40    0.70
 -17   5  -6    0.10    0.60
  17   5   6   -0.50    0.50
 -18   0  -6    1.30    0.60
 -18   0   6    0.30    0.60
 -18  -1   6    1.30    0.70
  18   1   6    2.50    0.80
 -18   1  -6    1.70    0.60
 -18   1   6    1.70    0.60
 -18  -1  -6    1.60    0.70
  18   2   6   -0.80    0.60
 -18   2  -6   -0.10    0.60
 -18   2   6   -0.40    0.60
 -18   3  -6    2.10    0.60
  18   3   6    2.30    0.60
 -18   3   6    2.50    0.60
 -18   4  -6   -0.60    0.50
  18   4   6    0.10    0.50
 -18   4   6   -0.30    0.50
 -19   0  -6   18.60    1.10
 -19   0   6   21.90    1.10
 -19   1  -6   10.60    0.90
 -19  -1   6    9.80    1.10
 -19   1   6    8.80    0.90
  19   2   6    1.20    0.60
 -19   2  -6    1.30    0.50
 -19   2   6    1.40    0.50
   0   0  -7    1.20    1.40
   0   0   7    1.50    1.00
   0  -1   7    1.30    1.00
   0   1  -7    0.10    1.30
   0  -1  -7   -0.20    1.40
   0   2  -7  936.11   20.90
   0   2   7  928.91   20.50
   0  -2   7  924.21   20.60
   0  -2   7  906.41   19.60
   0  -2  -7  901.21   20.70
   0  -3   7    1.70    1.10
   0   3   7    1.30    1.10
   0   3   7    0.70    1.40
   0  -3  -7   -1.90    1.80
   0   4   7  848.72   18.80
   0   4   7  833.52   19.80
   0  -4   7  840.52   19.00
   0  -5  -7    1.40    2.00
   0   5   7    0.10    1.60
   0  -6   7  137.69    4.20
   0  -6  -7  136.59    4.90
   0  -7  -7   -1.90    1.30
   0  -7   7    0.70    1.00
   0  -8  -7  181.18    5.40
   0  -8   7  179.38    4.80
   0  -9   7    0.80    0.90
   0  -9  -7   -0.10    0.90
   0 -10  -7    0.50    0.70
   0 -10   7    3.40    0.80
  -1   0   7    1.20    1.10
   1   0  -7    1.00    1.40
   1   0   7    0.70    1.00
  -1   0  -7   -0.60    1.30
  -1  -1   7    1.70    0.90
   1   1   7    0.50    1.00
  -1  -1   7    2.30    1.10
   1  -1  -7    1.70    1.40
  -1   1  -7    1.00    1.30
   1   1  -7    0.80    1.40
   1  -1   7    1.00    1.00
  -1  -1  -7    1.70    1.40
  -1   1   7    0.00    1.00
   1  -2  -7  652.53   15.40
   1   2   7  668.13   15.10
  -1  -2   7  647.24   14.30
  -1   2  -7  649.24   15.40
   1   2   7  660.73   15.20
  -1  -2   7  645.54   15.10
  -1  -2  -7  649.34   15.30
   1  -2   7  658.83   15.10
  -1   2   7  664.63   15.10
  -1  -3   7  524.65   11.60
   1   3   7  521.25   12.80
   1   3   7  534.75   12.30
  -1   3  -7  520.45   12.70
  -1  -3   7  515.85   12.40
   1  -3   7  509.95   12.30
  -1   3   7  533.65   12.30
  -1  -3  -7  514.65   12.70
   1   4   7   91.29    4.60
   1   4   7   97.19    3.70
  -1  -4   7   87.99    3.90
   1  -4   7   91.29    3.90
  -1  -4  -7  100.09    5.50
  -1   4   7   94.89    4.70
  -1   4   7   92.79    3.60
  -1  -5   7    0.60    1.20
   1   5   7    2.30    1.80
  -1  -5  -7    2.80    2.00
  -1  -6   7   12.00    1.80
   1  -6  -7   11.90    2.00
   1  -6   7   12.20    1.40
  -1  -6  -7   11.60    1.90
  -1  -7   7    3.90    1.00
   1  -7  -7    5.00    1.50
  -1  -7  -7    2.20    1.40
   1  -7   7    3.30    1.10
   1  -8  -7  266.97    7.00
  -1  -8   7  254.27    6.40
  -1  -8  -7  262.77    7.10
   1  -8   7  254.67    6.40
  -1  -9   7    2.10    0.80
  -1  -9  -7    1.00    1.00
   1  -9   7    1.20    0.90
   1 -10  -7   34.60    1.60
  -1 -10   7   37.50    1.50
   1 -10   7   34.90    2.00
  -1 -10  -7   34.90    1.60
   2   0   7    0.60    0.70
  -2   0   7   -1.00    1.00
  -2   0  -7    3.30    1.50
   2   0   7    1.50    1.10
   2   1   7  850.31   19.20
  -2  -1   7  857.01   19.40
   2   1   7  846.02   19.00
  -2   1  -7  859.91   19.40
  -2  -1   7  838.92   18.70
   2  -1   7  855.41   18.30
  -2  -1  -7  842.62   19.40
   2  -1   7  853.21   19.20
  -2   1   7  863.81   19.30
  -2   2  -7   84.79    3.90
  -2  -2   7   85.99    2.90
   2   2   7   85.89    3.40
  -2  -2   7   86.09    3.50
   2   2   7   79.79    3.80
  -2   2   7   85.79    3.50
  -2  -2  -7   81.49    3.90
   2  -2   7   88.89    3.40
  -2   3  -7   65.39    3.80
   2   3   7   61.99    3.30
  -2  -3   7   63.89    2.70
  -2  -3   7   62.69    3.20
   2  -3   7   60.09    3.10
  -2   3   7   60.09    3.00
  -2  -3  -7   62.19    4.10
   2   4   7  170.58    5.30
   2   4   7  175.88    6.30
  -2  -4   7  168.58    5.60
  -2   4  -7  169.08    8.70
  -2  -4   7  173.78    5.10
  -2   4   7  177.18    5.20
   2  -4   7  175.88    5.50
   2   5   7   19.30    2.10
  -2  -5   7   20.10    2.20
  -2  -5  -7   20.10    2.40
   2  -6  -7    1.20    1.80
  -2  -6   7    0.80    1.00
  -2  -6  -7    3.10    1.50
   2  -6   7   -0.50    1.20
   2  -7  -7   -0.30    1.50
  -2  -7   7    0.60    0.90
  -2  -7  -7    0.30    1.30
   2  -7   7    1.10    1.10
   2  -8  -7    1.90    1.40
  -2  -8   7    1.40    0.80
   2  -8   7    1.70    1.00
  -2  -8  -7    0.10    1.10
  -2  -9   7   28.90    1.60
   2  -9  -7   26.20    1.90
   2  -9   7   29.10    1.80
  -2  -9  -7   28.00    1.90
  -2 -10  -7    5.00    0.80
   3   0   7    0.60    0.80
  -3   0   7   -0.40    1.00
   3   0   7    0.40    1.10
  -3   0  -7    0.60    1.40
  -3   0   7   -1.00    1.20
  -3  -1   7  448.06   11.00
  -3   1  -7  438.96   11.10
  -3  -1   7  453.05   10.50
   3   1   7  437.76   10.50
   3   1   7  439.26   10.80
  -3   1   7  441.46   11.00
   3  -1   7  455.65    9.80
   3  -1   7  445.36   10.80
  -3  -1  -7  428.86   11.10
   3   2   7    1.20    1.30
  -3   2  -7    0.40    1.60
  -3  -2   7    0.80    1.10
  -3  -2   7    0.70    1.30
   3   2   7   -0.60    1.20
  -3   2   7    0.20    1.20
   3  -2   7    3.60    1.20
  -3  -2  -7    3.70    1.80
   3   3   7  123.89    4.50
   3   3   7  132.49    4.80
  -3  -3   7  132.99    4.80
  -3  -3   7  123.99    4.30
  -3   3  -7  129.29    5.20
   3  -3   7  131.29    4.50
  -3   3   7  128.49    4.50
   3   4   7   38.20    4.00
   3   4   7   41.70    3.10
  -3  -4   7   41.60    3.60
  -3  -4   7   41.70    3.70
  -3   4   7   41.70    3.00
   3  -4   7   36.20    3.40
  -3  -5   7   -0.20    1.00
   3   5   7    0.20    2.10
  -3  -5  -7    0.20    1.80
  -3  -6   7   11.20    1.70
   3  -6  -7   13.20    2.20
   3  -6   7    9.70    2.60
  -3  -6  -7   13.90    1.90
  -3  -7   7    6.80    1.10
   3  -7  -7   10.30    1.90
   3  -7   7    6.00    1.50
  -3  -7  -7    8.20    1.50
   3  -8  -7   49.60    2.90
  -3  -8   7   48.90    2.10
  -3  -8  -7   52.19    2.70
  -3  -9   7   23.20    1.70
   3  -9  -7   20.90    2.10
  -3  -9  -7   24.50    1.90
  -3 -10  -7    5.70    0.80
   4   0   7   -0.40    0.90
  -4   0   7   -0.80    1.20
   4   0   7    1.30    1.30
  -4   0  -7    1.20    1.60
  -4   0   7    0.80    1.40
  -4  -1   7    5.70    1.60
  -4   1  -7    4.00    1.90
   4   1   7    2.70    1.10
   4   1   7    3.30    1.30
  -4  -1   7    2.50    1.20
   4  -1   7    4.10    1.40
  -4   1   7    4.60    1.50
  -4  -1  -7    5.20    2.00
   4  -1   7    2.10    0.70
  -4   2  -7    8.00    2.00
   4   2   7    4.10    1.50
  -4  -2   7    5.40    1.60
   4   2   7    4.40    1.40
  -4  -2   7    5.50    1.60
   4  -2   7    6.10    1.50
  -4  -2  -7    1.20    2.30
   4   3   7    2.10    1.50
  -4  -3   7    1.60    1.70
  -4   3  -7    0.40    2.30
   4   3   7    0.60    1.70
  -4  -3   7    4.50    1.90
  -4   3   7    1.10    2.10
   4  -3   7   -0.90    1.60
  -4   3   7   -1.20    1.50
   4   4   7  327.47    8.80
  -4  -4   7  334.37    9.30
   4   4   7  326.27    9.60
  -4  -4   7  318.37    9.30
  -4   4   7  311.27    8.50
  -4  -5   7   22.90    2.00
   4   5   7   23.90    2.90
  -4  -5  -7   21.80    2.30
  -4  -6   7   49.00    2.40
   4  -6  -7   42.60    4.40
  -4  -6  -7   49.30    3.10
   4  -7  -7    7.40    2.70
  -4  -7   7    7.30    1.10
  -4  -7  -7    5.60    1.40
  -4  -8   7   31.30    1.70
  -4  -8  -7   30.10    2.30
  -4  -9   7    0.60    0.70
  -4  -9  -7    0.40    1.00
  -4 -10   7    1.90    0.60
  -4 -10  -7    0.40    0.60
   5   0   7    1.90    1.50
  -5   0   7    1.30    1.50
  -5   0  -7    0.80    1.90
  -5   0   7   -0.20    1.50
   5   0   7   -0.90    0.90
  -5  -1   7 1436.16   30.80
  -5  -1   7 1392.36   31.50
  -5   1  -7 1395.96   31.30
  -5  -1   7 1392.66   31.20
  -5  -1  -7 1381.96   31.40
  -5   1   7 1400.86   31.30
  -5   1   7 1340.87   30.80
   5  -1   7 1456.15   29.80
  -5   1   7 1356.56   31.30
   5  -1   7 1407.96   30.90
   5   2   7  199.58    6.10
  -5   2  -7  204.38    7.20
  -5  -2   7  202.08    6.60
   5   2   7  206.18    6.40
  -5  -2   7  200.68    6.30
  -5   2   7  203.68    6.60
  -5   2   7  203.28    7.10
   5  -2   7  202.88    6.30
  -5   3  -7   27.20    3.50
  -5  -3   7   25.90    3.80
   5   3   7   28.00    3.10
  -5  -3   7   28.70    4.00
   5   3   7   26.70    2.80
  -5   3   7   21.80    3.80
  -5   3   7   27.50    3.30
   5  -3   7   27.40    3.40
  -5  -4   7   87.59    3.50
   5   4   7   98.39    4.90
  -5  -4   7  100.59    6.50
  -5   4   7   90.59    4.70
  -5  -4  -7   81.99    4.30
  -5  -5   7    1.50    1.00
  -5  -5  -7   -0.10    1.40
  -5  -6   7   33.10    3.00
  -5  -6  -7   29.70    3.90
  -5  -7   7  145.19    4.20
  -5  -7  -7  145.59    4.90
  -5  -8   7   55.29    2.20
  -5  -8  -7   58.59    2.80
  -5  -9   7   58.49    2.10
  -5  -9  -7   60.59    2.40
  -5 -10  -7    3.50    0.70
   6   0   7   -1.30    1.80
  -6   0   7   -0.30    2.00
   6   0   7    0.20    1.10
  -6   0   7    2.40    2.80
  -6   0  -7   -1.00    2.70
  -6   0   7   -2.70    1.70
   6   1   7  169.48    5.80
   6   1   7  168.28    5.20
  -6   1  -7  154.18    6.90
  -6  -1   7  166.48    5.90
  -6  -1   7  144.59    7.40
   6  -1   7  164.48    5.70
   6  -1   7  178.18    4.50
  -6   1   7  173.48    6.10
  -6   1   7  169.98    7.10
  -6   1   7  166.58    5.90
  -6   2  -7 1004.30   24.60
  -6  -2   7 1048.10   24.40
   6   2   7 1059.89   23.80
   6   2   7 1081.09   24.10
  -6  -2   7 1008.50   24.00
  -6   2   7  988.50   24.50
   6  -2   7 1083.29   24.00
  -6   2   7 1106.89   24.30
   6   3   7  124.99    5.50
  -6  -3   7  128.79    6.10
   6   3   7  125.89    5.30
  -6   3   7  130.99    5.60
   6  -3   7  135.29    5.60
   6   4   7  302.17    9.00
  -6  -4   7  302.77    7.40
  -6  -4  -7  284.37    8.10
  -6   4   7  265.27    8.70
  -6  -5   7    2.60    1.10
   6   5   7   -0.90    2.60
   6   5  -7    0.70    2.00
  -6  -5  -7    1.80    1.60
  -6  -6   7    4.50    1.10
  -6  -6  -7    3.70    1.50
  -6  -7   7    1.20    0.90
  -6  -7  -7    2.30    1.30
  -6  -8   7   21.80    1.50
  -6  -8  -7   21.40    1.90
  -6  -9   7   -0.20    0.60
  -6  -9  -7   -0.90    0.60
  -6 -10  -7    3.10    0.60
  -7   0   7    1.60    1.90
   7   0   7    0.20    1.50
   7   0   7    0.30    1.80
  -7  -1   7   44.70    4.20
   7   1   7   53.79    3.90
   7   1   7   48.40    3.10
  -7   1   7   39.30    4.80
   7  -1   7   48.70    4.10
   7  -1   7   45.70    2.70
  -7   1   7   47.00    4.10
  -7  -2   7   45.40    4.60
   7   2   7   54.29    4.00
  -7   2  -7   45.80    5.10
   7   2   7   47.50    4.00
  -7   2   7   49.00    5.60
   7  -2   7   46.90    4.50
  -7   2   7   48.20    4.40
   7   3   7  253.07    8.70
  -7  -3   7  276.07    9.60
  -7   3   7  274.77    8.90
   7   3  -7  305.87    8.90
  -7  -4   7   32.10    2.30
   7   4   7   37.30    3.70
   7   4  -7   33.50    3.20
  -7  -4  -7   28.50    3.20
  -7  -5   7    4.20    1.20
   7   5   7    8.80    2.20
  -7  -5  -7    3.90    1.60
   7   5  -7    7.20    1.80
   7   6   7   26.40    3.60
  -7  -6   7   23.40    1.90
  -7  -6  -7   22.40    2.50
  -7  -7   7   83.09    2.90
  -7  -7  -7   88.39    3.50
  -7  -8   7    3.70    0.80
  -7  -8  -7    4.30    1.00
  -7  -9   7    7.90    0.90
  -7  -9  -7    7.50    1.10
  -8   0   7   -3.00    2.50
   8   0   7    1.70    1.80
   8   0   7    0.40    2.10
   8   1   7    6.90    2.30
  -8  -1   7    3.80    2.80
   8   1   7    8.00    2.60
   8  -1   7    5.50    2.50
   8  -1   7    5.00    2.30
  -8   1   7    4.60    2.80
  -8  -2   7   10.30    2.70
   8   2   7    5.10    2.80
   8   2   7    9.80    2.90
   8   2   7   10.60    2.00
  -8   2   7    8.00    3.10
   8  -2   7    9.70    2.90
   8   2  -7    5.20    1.80
   8   3   7   -0.90    1.70
  -8  -3   7    0.90    1.50
  -8  -3   7    4.10    3.80
  -8   3   7    2.70    1.80
   8   3  -7   -0.80    1.50
  -8  -3  -7    3.60    2.50
   8   4   7   58.79    3.60
  -8  -4   7   62.19    2.80
   8   4  -7   54.19    3.20
  -8   4   7   53.89    3.70
  -8  -4  -7   58.09    3.70
  -8  -5   7   32.30    2.10
   8   5   7   40.60    3.20
   8   5  -7   34.00    2.80
   8   6   7    1.70    1.70
  -8  -6   7    0.20    0.80
  -8  -6  -7   -0.10    1.20
  -8  -7   7    0.10    0.80
  -8  -7  -7    1.20    1.10
  -8  -8   7    0.90    0.80
  -8  -8  -7    0.90    1.30
  -8  -9   7    1.10    0.60
  -8  -9  -7   -0.10    0.60
  -9   0   7    0.40    1.40
   9   0  -7   -1.00    1.50
  -9   0   7    4.50    3.50
   9   0   7   -2.10    2.60
   9   0   7    3.80    1.70
   9   0   7   -0.60    3.00
  -9  -1   7   44.20    6.30
   9   1   7   42.40    4.20
   9   1   7   39.10    4.60
  -9  -1   7   44.10    2.70
   9   1   7   42.60    3.10
  -9   1   7   41.40    2.80
   9  -1   7   47.10    5.90
   9   1  -7   43.70    2.80
  -9   1   7   49.30    5.60
   9  -1   7   46.00    3.40
  -9  -2   7  102.89    7.50
   9   2   7   88.09    3.80
  -9  -2   7   88.79    3.40
   9  -2   7  101.09    7.10
   9   2  -7   91.29    3.60
  -9   2   7   81.39    3.60
  -9  -3   7   32.20    3.00
   9   3   7   29.90    2.70
  -9  -3   7   24.30    2.60
  -9   3   7   28.40    2.80
   9   3  -7   23.40    2.60
  -9  -3  -7   30.30    4.20
  -9  -4   7   33.70    2.30
   9   4   7   33.90    2.90
   9   4  -7   33.00    2.60
  -9   4   7   26.90    2.90
  -9  -4  -7   30.80    3.30
  -9  -5   7   24.30    1.90
   9   5   7   23.10    2.60
  -9   5   7   24.30    2.30
  -9  -5  -7   18.00    2.50
   9   5  -7   21.10    2.30
   9   6   7   34.30    2.80
  -9  -6   7   40.60    2.10
  -9  -6  -7   40.40    2.60
   9   7   7   11.20    1.80
  -9  -7   7   12.60    1.40
  -9  -7  -7   11.70    1.60
  -9  -8   7    2.70    0.70
  -9  -8  -7    2.10    0.80
  -9  -9   7   15.50    1.00
  -9  -9  -7   16.50    1.10
  10   0   7    1.10    1.50
 -10   0   7   -0.10    1.20
  10   0  -7    2.30    1.40
  10   1   7  108.59    4.00
 -10  -1   7  111.89    3.70
 -10   1   7  107.09    3.70
  10  -1   7   87.09    8.30
  10  -1   7  107.89    4.10
  10   1  -7  110.89    3.80
 -10  -2   7   51.09    2.60
  10   2   7   51.29    2.90
 -10   2   7   49.30    2.70
  10  -2   7   45.00    3.60
  10   2  -7   49.30    2.70
  10   3   7   37.70    2.80
 -10  -3   7   38.30    2.80
 -10  -3  -7   38.70    3.10
  10   3  -7   41.10    2.60
 -10   3   7   42.10    2.60
  10   4   7   47.20    2.80
 -10  -4   7   48.20    2.60
 -10   4   7   49.50    3.30
  10   4  -7   44.30    2.60
 -10  -5   7   29.10    1.90
  10   5   7   25.10    2.50
 -10   5   7   27.10    2.80
  10   5  -7   28.10    2.30
 -10  -5  -7   32.30    2.70
 -10  -6   7   19.70    1.60
  10   6   7   19.80    2.30
 -10  -6  -7   19.50    2.00
 -10  -7   7    3.80    0.80
  10   7   7    3.40    1.40
 -10  -7  -7    3.20    1.00
 -10  -8   7    1.60    0.60
 -10  -8  -7    0.60    0.70
 -10  -9   7    6.30    0.90
 -11   0   7    0.90    1.10
  11   0   7    1.10    1.40
 -11  -1   7   91.89    3.30
  11   1   7   90.89    3.70
  11  -1   7   94.39    3.70
  11   1  -7   94.49    3.40
 -11   1   7   90.89    3.40
  11   2   7  185.98    5.60
 -11  -2   7  184.28    5.20
  11  -2   7  183.98    5.70
 -11   2   7  198.58    5.40
 -11  -2  -7  196.08    5.30
  11   2  -7  190.18    5.40
 -11  -3   7  104.09    3.70
  11   3   7  106.49    3.80
  11   3  -7  105.99    3.70
 -11  -3  -7  108.99    3.90
 -11   3   7  105.89    3.70
  11   4   7   21.40    2.30
  11   4  -7   23.40    2.10
 -11  -4  -7   21.40    2.50
 -11   4   7   20.60    2.30
  11   5   7    1.80    1.20
 -11  -5   7   -0.10    1.00
 -11   5   7    0.50    1.30
  11   5  -7    0.10    1.00
 -11  -5  -7    0.50    1.40
  11   6   7    2.90    1.20
 -11  -6   7   -0.20    0.80
 -11   6   7    0.30    1.60
 -11  -6  -7    0.10    1.00
 -11  -7   7    1.00    0.70
  11   7   7    0.40    1.00
 -11  -7  -7    1.10    0.80
 -11  -8   7   12.20    1.00
 -11  -8  -7   12.60    1.10
 -12   0   7   -0.60    1.00
  12   0   7   -0.40    1.20
  12   1   7   36.90    2.50
 -12  -1   7   33.70    2.10
  12   1  -7   32.30    2.20
 -12   1   7   31.70    2.20
  12  -1   7   29.00    3.10
 -12  -1  -7   32.30    2.20
  12   2   7    0.20    1.20
 -12  -2   7    0.30    1.00
 -12   2   7    1.70    1.00
  12   2  -7    1.60    1.10
 -12  -2  -7    1.50    1.10
  12   3   7   11.80    1.50
 -12  -3   7   11.60    1.50
  12   3  -7   13.00    1.80
 -12   3   7   10.00    1.40
 -12  -3  -7    8.20    1.70
 -12  -4   7   21.50    1.90
  12   4   7   29.10    2.20
 -12   4   7   30.50    2.20
  12   4  -7   26.00    2.00
  12   5   7    1.00    1.10
 -12  -5  -7    1.60    1.40
  12   5  -7    1.60    1.00
 -12   5   7    0.60    1.10
 -12   6  -7    9.10    1.30
 -12  -6   7    8.40    1.10
 -12   6   7   10.30    1.40
 -12  -6  -7    9.40    1.30
  12   7   7   -0.10    0.90
 -12  -7   7    0.90    0.80
 -12  -7  -7    1.40    0.80
 -12  -8   7    1.70    0.60
  12   8   7    2.30    1.10
 -12  -8  -7    1.00    0.90
 -13   0  -7    0.90    1.00
  13   0   7    0.70    1.10
 -13   0   7    0.40    0.90
 -13  -1   7  148.19    4.30
  13   1   7  145.99    4.50
 -13   1   7  152.28    4.40
  13   1  -7  141.19    4.20
  13  -1   7  144.49    4.40
 -13  -1  -7  144.69    4.30
  13   2   7  112.59    3.80
 -13  -2   7  111.09    3.60
 -13  -2  -7  110.99    3.60
 -13   2   7  111.49    3.70
  13   2  -7  113.59    3.60
  13   3   7   -1.10    1.00
 -13  -3   7    1.00    1.30
  13   3  -7   -0.60    1.00
 -13  -3  -7    0.10    1.60
 -13   3   7   -0.10    1.00
  13   4   7   16.00    1.80
  13   4  -7   15.10    1.60
 -13   4   7   15.60    1.80
 -13   5  -7    7.00    1.10
 -13  -5   7    7.20    1.30
  13   5   7    6.60    1.10
 -13   5   7    8.00    1.20
 -13   6  -7    1.40    1.00
 -13  -6   7    1.80    0.90
  13   6   7   -0.20    0.80
 -13   6   7    0.90    1.10
 -13  -7   7    7.20    1.10
  13   7   7    6.50    1.00
  13   8   7    2.90    1.00
 -14   0   7   -0.40    0.90
 -14   0  -7   -0.10    0.90
  14   0   7   -1.90    1.00
 -14   1  -7    7.60    1.10
 -14  -1   7    9.40    1.20
  14   1   7    6.40    1.20
  14  -1   7   10.40    1.40
 -14   1   7    8.10    1.10
 -14  -1  -7    9.60    1.20
 -14  -2   7    1.60    1.00
 -14   2  -7    2.40    1.00
  14   2   7    1.70    1.00
 -14   2   7    2.40    1.00
 -14  -2  -7    3.30    1.10
  14   3   7   22.60    1.90
 -14   3  -7   20.70    1.70
 -14  -3   7   23.30    2.10
 -14   3   7   25.20    1.80
  14   3  -7   22.20    1.70
 -14   4  -7    2.50    0.90
  14   4   7    1.80    1.00
 -14   4   7    2.40    0.90
 -14   5  -7    4.40    0.90
  14   5   7    2.50    0.90
 -14   5   7    2.10    0.90
  14   6   7    1.10    0.70
 -14   6  -7    1.10    0.80
 -14   6   7    0.20    0.90
  14   7   7    4.80    0.80
  15   0   7   -0.40    1.00
 -15   0  -7    1.60    0.90
 -15   0   7   -0.20    0.80
 -15  -1   7   35.70    1.90
  15   1   7   37.30    2.10
 -15   1  -7   37.70    2.00
 -15   1   7   37.10    2.00
  15  -1   7   40.20    2.40
 -15  -1  -7   35.70    1.90
 -15   2  -7   60.29    2.40
 -15  -2   7   59.99    2.30
  15   2   7   58.39    2.50
 -15   2   7   58.39    2.40
 -15  -2  -7   58.79    2.40
 -15   3  -7   13.50    1.50
  15   3   7   13.80    1.60
 -15   3   7   14.60    1.50
 -15   4  -7   10.10    1.30
  15   4   7    8.50    1.10
 -15   4   7    8.30    1.00
 -15   5  -7    2.50    0.70
  15   5   7    2.80    0.80
 -15   5   7    1.10    0.70
  15   6   7    0.50    0.60
 -15   6  -7    0.40    0.70
 -16   0  -7    1.50    0.80
 -16   0   7   -0.40    0.70
  16   0   7   -0.90    0.90
 -16   1  -7   14.20    1.40
 -16   1   7   13.60    1.40
 -16  -1  -7   13.20    1.70
 -16  -2   7   10.50    1.40
  16   2   7   10.20    1.10
 -16   2  -7   10.80    1.40
 -16  -2  -7   10.90    1.10
 -16   2   7   12.00    1.30
 -16   3  -7   12.90    1.20
  16   3   7    9.90    1.30
 -16   3   7   11.20    1.20
  16   4   7   13.40    1.20
 -16   4  -7   13.90    1.20
 -16   4   7   13.10    1.20
 -16   5  -7   -0.20    0.60
  16   5   7    0.90    0.60
 -16   5   7   -0.40    0.60
  16   6   7   34.30    1.40
 -17   0   7    0.60    0.70
 -17   0  -7    0.00    0.70
  17   0   7   -0.60    0.90
 -17   1  -7    0.80    0.70
  17   1   7   -0.30    0.80
 -17  -1   7    1.60    0.70
 -17   1   7   -0.10    0.60
 -17  -1  -7    1.10    0.70
  17   2   7   16.50    1.30
 -17   2  -7   16.00    1.20
 -17  -2   7   17.30    1.40
 -17   2   7   16.50    1.20
 -17  -2  -7   13.30    1.50
 -17   3  -7    2.90    0.70
  17   3   7    1.40    0.70
 -17   3   7    3.00    0.70
  17   4   7    5.80    0.70
 -17   4  -7    6.80    0.70
 -17   4   7    5.50    0.70
 -17   5  -7    7.40    0.90
  17   5   7    6.40    0.80
 -17   5   7    7.10    0.90
 -18   0  -7    1.30    0.60
 -18   0   7    0.70    0.60
 -18  -1   7    0.60    0.60
 -18   1  -7    0.60    0.60
  18   1   7    1.90    0.80
 -18   1   7    1.70    0.60
 -18  -1  -7    1.00    0.70
 -18   2  -7    5.90    0.70
  18   2   7    5.40    0.80
 -18   2   7    5.60    0.70
  18   3   7    1.70    0.60
 -18   3  -7    1.20    0.50
 -18   3   7    2.20    0.50
 -19   0   7    0.20    0.60
 -19   0  -7    0.10    0.60
 -19   1  -7   13.40    0.90
 -19   1   7   12.50    0.90
   0   0   8 8420.46  177.48
   0   0  -8 8508.85  177.68
   0  -1  -8    1.20    1.60
   0   1   8   -0.10    1.10
   0   1  -8   -0.20    1.60
   0  -1   8    0.80    1.10
   0   2  -8  688.93   16.40
   0   2   8  707.93   16.00
   0  -2   8  704.83   16.00
   0  -2  -8  653.63   16.20
   0  -2   8  679.93   14.90
   0   3   8    0.80    1.30
   0  -3   8    0.50    1.30
   0   3   8   -1.20    1.60
   0  -3  -8   -3.60    2.50
   0   4   8  324.37    9.60
   0   4   8  320.07    8.40
   0  -4   8  327.77    8.70
   0  -5  -8   -0.70    1.80
   0   5   8    1.30    2.10
   0  -5   8    0.00    1.20
   0  -6  -8    5.70    1.70
   0  -6   8    6.90    1.10
   0  -7   8    0.40    0.90
   0  -7  -8    0.80    1.40
   0  -8   8   93.99    3.10
   0  -8  -8   96.69    3.70
   0  -9   8    1.20    0.80
   0  -9  -8   -0.40    0.90
   0 -10  -8   20.50    1.30
   0 -10   8   21.40    1.30
   1   0   8  845.42   19.50
   1   0  -8  861.11   20.00
  -1   0  -8  872.41   19.90
  -1   0   8  869.01   19.70
  -1  -1   8  553.74   13.20
  -1  -1   8  551.14   12.50
   1   1   8  542.85   13.10
   1  -1  -8  532.95   13.50
  -1   1  -8  559.04   13.50
   1  -1   8  558.44   13.20
   1   1  -8  554.84   13.70
  -1  -1  -8  551.14   13.50
  -1   1   8  570.14   13.20
  -1   2  -8 1139.09   25.70
   1   2   8 1149.19   25.30
  -1  -2   8 1110.69   24.50
   1   2   8 1153.58   25.40
  -1  -2   8 1145.99   25.40
  -1   2   8 1188.08   25.40
  -1  -2  -8 1085.29   25.60
   1  -2   8 1136.89   25.30
  -1   3  -8    7.90    2.30
  -1  -3   8    9.10    1.70
   1   3   8    9.00    1.60
  -1  -3   8   12.50    1.30
   1   3   8   11.00    2.00
   1  -3   8    9.00    1.60
  -1   3   8   10.10    1.60
  -1  -4   8    6.00    1.90
   1   4   8    5.20    1.70
   1   4   8    3.20    2.40
   1  -4   8    3.70    2.00
  -1   4   8    7.20    1.60
  -1   4   8    4.30    2.50
   1   5   8   35.00    3.90
  -1  -5   8   35.50    2.30
   1  -5  -8   37.40    3.60
  -1  -5  -8   35.00    3.30
   1  -5   8   34.20    2.50
  -1   5   8   27.40    3.40
   1  -6  -8    9.30    1.80
  -1  -6   8    7.20    1.20
  -1  -6  -8    5.80    1.60
   1  -6   8    6.80    1.20
   1  -7  -8   42.90    3.00
  -1  -7   8   43.80    2.20
   1  -7   8   46.10    2.30
  -1  -7  -8   49.20    2.90
   1  -8  -8   85.79    3.50
  -1  -8   8   81.39    2.80
  -1  -8  -8   86.59    3.50
   1  -8   8   87.19    2.90
  -1  -9   8    3.70    0.80
   1  -9  -8    3.90    1.10
  -1  -9  -8    3.00    1.20
   1  -9   8    4.90    0.90
   1 -10  -8    1.60    0.80
  -1 -10   8    2.90    0.70
  -1 -10  -8    2.00    0.70
  -2   0  -8 1388.46   30.90
  -2   0   8 1398.86   30.70
   2   0   8 1403.36   30.00
   2   0   8 1372.86   30.60
  -2  -1   8  423.56   10.40
   2   1   8  413.16   10.30
   2   1   8  403.16    9.90
  -2   1  -8  412.56   10.70
   2  -1   8  411.26    9.30
  -2   1   8  407.06   10.40
   2  -1   8  413.76   10.30
  -2  -1  -8  403.16   10.70
  -2  -2   8    1.90    1.30
   2   2   8    2.10    1.30
   2   2   8    1.00    1.40
  -2  -2   8    4.10    1.20
  -2   2  -8    6.40    1.90
   2  -2   8    1.20    1.30
  -2   2   8    1.70    1.40
  -2  -2  -8    5.00    2.20
   2   3   8 1353.96   30.70
  -2  -3   8 1352.36   29.80
   2   3   8 1373.96   30.40
  -2  -3   8 1389.46   30.60
  -2   3   8 1394.86   30.40
   2  -3   8 1422.66   30.50
   2   4   8    6.50    1.80
  -2  -4   8    8.20    2.10
   2   4   8    5.80    2.50
  -2   4   8    8.50    1.70
   2  -5  -8  138.49    5.40
   2   5   8  150.48    5.70
  -2  -5   8  141.09    4.20
  -2  -5  -8  136.79    5.10
  -2   5   8  148.09    5.10
   2  -5   8  133.99    4.50
  -2  -6   8    5.60    1.10
   2  -6  -8    4.20    1.80
  -2  -6  -8    6.30    1.70
   2  -6   8    6.00    1.40
  -2  -7   8  221.58    5.80
   2  -7  -8  223.18    6.50
  -2  -7  -8  222.98    6.60
   2  -7   8  218.98    5.70
  -2  -8   8    0.00    0.70
   2  -8  -8    1.30    1.30
   2  -8   8   -0.30    1.00
  -2  -8  -8   -0.40    1.10
   2  -9  -8    3.90    1.10
  -2  -9   8    7.10    1.10
  -2  -9  -8    4.00    1.10
   2  -9   8    4.30    1.00
  -2 -10  -8    6.70    1.00
  -3   0  -8 1947.31   43.00
   3   0   8 1998.00   42.80
  -3   0   8 1959.40   42.40
   3   0   8 1992.10   42.00
  -3   0   8 1960.00   42.90
  -3   1  -8   34.00    3.60
  -3  -1   8   31.00    2.80
  -3  -1   8   34.00    2.40
   3   1   8   30.20    2.70
   3   1   8   30.20    2.30
   3  -1   8   33.10    1.60
   3  -1   8   29.20    2.70
  -3  -1  -8   29.20    3.70
  -3   1   8   27.00    2.70
  -3  -2   8   28.70    2.50
  -3  -2   8   28.30    2.90
   3   2   8   21.50    2.60
   3   2   8   27.30    2.70
  -3   2  -8   22.60    2.70
  -3   2   8   28.00    2.90
  -3  -2  -8   38.20    4.90
   3  -2   8   28.00    2.80
  -3   3  -8  253.37    8.20
   3   3   8  244.38    7.10
   3   3   8  243.78    7.40
  -3  -3   8  247.28    7.40
  -3  -3   8  243.28    6.80
  -3   3   8  250.97    7.20
   3  -3   8  253.57    7.20
   3   4   8  167.18    5.80
  -3  -4   8  165.08    7.80
  -3   4   8  169.98    5.60
   3   5   8  161.78    6.50
  -3  -5   8  170.58    4.80
   3  -5  -8  163.18    5.90
  -3  -5  -8  164.08    5.50
   3  -6  -8  135.69    5.00
  -3  -6   8  134.89    4.00
  -3  -6  -8  140.49    4.80
   3  -6   8  108.79    4.10
   3  -7  -8   13.60    1.90
  -3  -7   8   15.90    1.60
  -3  -7  -8   15.50    2.30
  -3  -8   8    1.50    0.80
   3  -8  -8    3.40    1.50
  -3  -8  -8    3.30    1.20
  -3  -9   8    8.50    1.20
   3  -9  -8    5.50    1.20
  -3  -9  -8    5.80    1.10
  -3 -10  -8    0.10    0.60
   4   0   8    3.90    1.10
  -4   0   8    3.80    1.70
   4   0   8    4.00    1.50
  -4   0  -8    4.70    2.10
  -4   0   8    3.20    1.60
  -4  -1   8   14.40    1.90
   4   1   8   10.50    2.60
   4   1   8   11.30    2.40
  -4  -1   8   13.30    1.90
  -4   1  -8   16.40    2.60
  -4  -1  -8   15.30    2.80
   4  -1   8   15.90    1.90
  -4   1   8   14.00    1.90
   4  -1   8   13.50    1.40
  -4  -2   8   53.69    3.60
   4   2   8   53.89    3.10
   4   2   8   57.49    3.60
  -4  -2   8   57.49    3.30
  -4   2  -8   45.50    4.70
   4  -2   8   58.29    3.50
  -4   2   8   53.49    3.60
  -4   3  -8    0.20    3.00
  -4  -3   8   -0.10    2.10
   4   3   8    1.00    2.10
  -4  -3   8    1.60    1.90
   4   3   8   -1.10    1.70
  -4   3   8    1.30    1.80
   4  -3   8   -2.30    1.90
   4   4   8    7.40    2.30
  -4  -4   8    5.40    1.30
  -4   4   8    3.50    2.10
   4  -5  -8   79.69    4.70
  -4  -5   8   76.09    3.00
   4   5   8   92.79    7.10
  -4  -5  -8   72.39    3.80
   4  -6  -8    2.30    2.10
  -4  -6  -8   -0.30    1.60
   4  -7  -8   64.99    4.10
  -4  -7   8   64.69    2.60
  -4  -7  -8   65.99    3.20
  -4  -8   8   85.69    2.90
  -4  -8  -8   88.79    3.40
  -4  -9   8    8.30    1.10
  -4 -10  -8    1.20    0.60
   5   0   8 2657.73   56.09
  -5   0  -8 2584.94   57.49
  -5   0   8 2587.54   56.69
  -5   0   8 2745.33   57.39
  -5  -1   8  221.28    7.80
  -5  -1   8  214.98    6.70
  -5   1  -8  212.88    8.00
   5   1   8  232.58    6.40
   5   1   8  230.58    7.00
   5  -1   8  233.38    5.60
   5  -1   8  234.88    7.00
  -5   1   8  211.78    6.90
  -5   1   8  228.68    7.20
  -5   2  -8   37.70    5.40
  -5  -2   8   24.90    2.80
   5   2   8   22.50    3.10
   5   2   8   28.10    2.90
  -5  -2   8   21.30    2.70
  -5   2   8   21.60    3.40
  -5   2   8   26.40    3.30
   5  -2   8   23.50    2.40
   5   3   8  179.68    6.30
   5   3   8  173.48    6.50
  -5  -3   8  162.48    6.80
  -5  -3   8  181.58    6.80
   5  -3   8  195.58    6.50
  -5   3   8  171.18    6.30
   5   4   8   16.30    2.80
  -5  -4   8   17.80    2.00
  -5   4   8   15.60    2.80
  -5  -4  -8   14.80    2.20
  -5  -5   8   66.79    2.80
  -5  -5  -8   66.49    3.60
  -5  -6   8    7.30    1.20
  -5  -6  -8    6.80    1.60
  -5  -7   8    1.40    0.80
  -5  -7  -8    2.50    1.30
  -5  -8   8    3.80    0.80
  -5  -8  -8    4.10    1.20
  -5  -9   8   17.40    1.20
  -5  -9  -8   14.20    1.40
  -5 -10  -8    4.00    0.70
   6   0   8   19.30    2.40
  -6   0   8   13.50    2.90
  -6   0   8   16.90    2.40
   6   0   8   17.90    2.20
   6   1   8   24.20    3.40
   6   1   8   31.80    2.70
  -6   1  -8   28.00    3.90
  -6  -1   8   30.10    4.00
  -6  -1   8   30.10    4.20
   6  -1   8   30.90    2.20
  -6   1   8   32.50    3.80
  -6   1   8   24.70    4.00
   6  -1   8   36.30    3.80
   6   2   8   99.39    5.00
  -6   2  -8   98.89    7.80
   6   2   8  107.59    4.80
  -6  -2   8  107.69    5.60
   6  -2   8  105.59    5.10
  -6   2   8   99.99    7.50
  -6   2   8  108.39    5.20
   6   3   8   34.60    4.30
  -6  -3   8   39.70    4.00
   6  -3   8   39.10    4.80
  -6   3   8   40.00    4.50
  -6  -4   8   32.20    2.30
   6   4   8   35.40    4.00
   6   4  -8   28.70    3.20
  -6   4   8   29.40    3.60
  -6  -4  -8   38.80    3.40
  -6  -5   8   87.99    3.20
   6   5   8   91.39    4.70
  -6  -5  -8   86.59    3.80
  -6  -6   8  100.29    3.40
  -6  -6  -8   95.69    4.00
  -6  -7   8   24.90    1.70
  -6  -7  -8   27.70    2.20
  -6  -8   8   36.10    1.80
  -6  -8  -8   38.40    2.30
  -6  -9   8    2.00    0.60
  -6  -9  -8    0.00    0.70
  -6 -10  -8    3.90    0.60
   7   0   8  572.74   14.40
  -7   0   8  562.94   14.70
   7   0   8  553.94   13.20
   7   1   8   74.69    4.00
  -7  -1   8   72.89    5.10
   7   1   8   84.39    4.80
  -7   1   8   88.99    5.20
   7  -1   8   77.49    3.40
   7  -1   8   83.19    4.80
   7   2   8   17.50    2.50
   7   2   8   22.40    2.90
  -7  -2   8   23.70    3.20
   7  -2   8   22.80    3.10
  -7   2   8   18.10    2.90
  -7  -3   8    1.50    1.40
  -7  -3   8   -2.10    3.70
   7   3   8    2.10    2.00
  -7   3   8    6.40    3.10
  -7  -3  -8    3.40    2.40
   7   3  -8    1.50    1.70
  -7  -4   8   53.09    2.50
   7   4   8   53.29    3.60
   7   4  -8   49.80    3.10
  -7   4   8   47.50    3.80
  -7  -4  -8   53.49    3.50
   7   5   8    2.40    1.80
  -7  -5   8    1.60    1.10
  -7  -5  -8    1.60    1.40
  -7  -6   8    9.90    1.20
   7   6   8   10.00    2.20
  -7  -6  -8   11.50    1.60
  -7  -7   8    2.40    0.80
  -7  -7  -8    1.60    1.10
  -7  -8   8   12.50    1.30
  -7  -8  -8   13.20    1.60
  -7  -9   8   20.10    1.20
  -7  -9  -8   18.00    1.30
  -8   0   8    9.80    1.50
  -8   0   8    4.70    3.00
   8   0   8    5.60    2.00
   8   0   8    5.70    2.20
   8   0   8    1.10    2.80
   8   1   8   77.79    5.50
   8   1   8   77.39    4.60
   8   1   8   80.19    3.80
  -8  -1   8   85.09    6.10
  -8  -1   8   71.79    3.30
  -8   1   8   80.99    3.40
   8   1  -8   79.39    3.50
  -8   1   8   86.99    6.20
   8  -1   8   83.69    5.80
  -8  -2   8  176.18    5.30
  -8  -2   8  192.88    8.50
   8   2   8  180.78    5.60
  -8   2   8  177.18    5.40
   8   2  -8  181.98    5.30
   8  -2   8  184.78    7.70
  -8  -3   8   16.20    2.40
   8   3   8   21.40    2.80
  -8  -3   8   26.00    3.10
  -8   3   8   21.60    2.80
  -8  -3  -8   21.90    2.70
   8   3  -8   22.40    2.50
  -8  -4   8    5.40    1.30
   8   4   8    6.90    1.60
  -8   4   8   10.30    1.90
  -8  -4  -8    6.20    1.80
   8   4  -8    6.30    1.50
  -8  -5   8  183.98    5.00
   8   5   8  179.28    5.60
  -8  -5  -8  181.58    5.70
  -8  -6   8   28.60    1.90
   8   6   8   28.80    2.90
  -8  -6  -8   26.90    2.40
  -8  -7   8   13.00    1.40
   8   7   8   11.80    2.00
  -8  -7  -8   14.60    1.90
  -8  -8   8   19.50    1.40
  -8  -8  -8   17.30    1.60
  -8  -9  -8    3.20    0.70
   9   0   8   -0.40    1.60
   9   0   8   -0.90    3.20
  -9   0   8   -0.10    1.30
  -9  -1   8   -4.20    3.70
   9   1   8   -2.10    1.40
  -9  -1   8   -2.40    1.20
   9  -1   8   -3.60    1.70
  -9   1   8    0.20    1.30
   9   1  -8   -1.50    1.30
   9  -1   8    4.00    3.60
   9   2   8    3.10    1.50
  -9  -2   8    2.90    1.30
  -9  -2   8    2.90    5.00
   9  -2   8    1.80    2.20
   9   2  -8    3.60    1.40
  -9   2   8    4.50    1.40
  -9  -3   8    0.50    1.60
   9   3   8    1.20    1.50
   9   3  -8    2.10    1.30
  -9   3   8    2.60    1.40
  -9  -3  -8    1.10    2.30
   9   4   8   71.49    4.30
  -9  -4   8   66.39    2.80
  -9  -4  -8   66.79    3.80
  -9   4   8   67.29    3.40
   9   5   8    0.80    1.40
  -9  -5   8    2.60    1.00
  -9  -5  -8    2.10    1.40
  -9   5   8    2.80    1.70
  -9  -6   8   93.89    3.10
   9   6   8   87.69    3.60
  -9  -6  -8   91.09    3.60
  -9  -7   8   43.90    2.00
   9   7   8   42.10    3.40
  -9  -7  -8   42.40    2.30
  -9  -8   8   14.40    1.20
  -9  -8  -8   13.10    1.30
  -9  -9   8    2.90    0.70
  -9  -9  -8    1.30    0.60
  10   0   8   43.00    2.80
 -10   0   8   45.90    2.40
  10   1   8   11.90    1.60
  10  -1   8   13.40    1.80
 -10   1   8   11.40    1.50
  10   1  -8   14.10    1.60
  10   2   8    4.00    1.60
 -10  -2   8    5.60    1.30
  10  -2   8    5.70    2.00
  10   2  -8    2.90    1.30
 -10   2   8    4.80    1.30
 -10  -3   8    8.00    1.60
 -10  -3  -8    7.10    1.80
 -10   3   8    6.80    1.50
 -10  -4   8   10.50    1.40
  10   4   8   13.20    1.60
  10   4  -8   15.20    2.00
 -10   4   8   18.30    2.40
 -10  -4  -8   17.10    2.20
  10   5   8   -0.50    1.20
 -10  -5   8   -0.60    0.90
 -10  -5  -8    1.20    1.40
 -10   5   8    0.40    1.40
  10   6   8    8.30    1.40
 -10  -6   8    9.40    1.40
 -10  -6  -8   10.00    1.40
 -10  -7   8   25.20    1.90
  10   7   8   17.10    2.20
 -10  -7  -8   22.40    1.80
 -10  -8   8   11.90    1.10
 -10  -8  -8    8.70    1.10
 -10  -9   8    3.90    0.60
 -10  -9  -8    3.60    0.60
 -11   0   8    1.80    1.00
  11   0   8    2.40    1.40
 -11  -1   8   -0.40    1.00
  11   1   8    1.20    1.30
  11  -1   8    2.20    1.40
 -11   1   8    0.20    1.10
  11   2   8   58.79    3.00
  11  -2   8   55.79    3.50
 -11   2   8   62.39    2.80
 -11  -2  -8   63.39    3.10
  11   2  -8   66.79    2.80
 -11  -3   8   36.80    2.60
 -11  -3   8   32.40    2.70
  11   3   8   44.30    2.60
 -11   3   8   43.10    2.40
 -11  -3  -8   39.30    2.90
  11   3  -8   42.00    2.40
  11   4   8    1.40    1.20
 -11  -4  -8    0.10    2.00
  11   4  -8   -0.40    1.00
 -11   4   8    0.90    1.10
  11   5   8   18.60    2.00
 -11  -5   8   12.30    1.70
 -11  -5  -8   18.10    2.40
 -11   5   8   18.80    2.10
 -11  -6   8    5.40    1.00
  11   6   8   10.80    1.40
 -11  -6  -8    8.00    1.30
  11   7   8    5.90    1.20
 -11  -7   8    5.50    0.90
 -11  -7  -8    6.70    1.00
 -11  -8   8   28.60    1.30
 -11  -8  -8   26.20    1.40
 -12   0   8   68.59    2.80
  12   0   8   65.29    3.00
 -12  -1   8   20.80    1.90
  12   1   8   19.30    2.10
 -12   1   8   18.70    1.80
  12  -1   8   21.20    2.30
  12   2   8   19.20    2.20
 -12  -2   8   17.30    1.90
 -12   2   8   17.50    1.90
  12   2  -8   18.40    1.90
 -12  -2  -8   18.40    2.00
  12   3   8   -2.20    1.10
 -12  -3   8    0.50    1.30
 -12   3   8   -0.70    0.90
  12   3  -8    0.80    1.00
 -12  -3  -8   -0.30    1.60
  12   4   8    0.40    1.10
 -12  -4   8   -0.10    1.30
 -12   4   8   -0.20    1.00
 -12  -5   8   -0.30    1.00
  12   5   8    2.20    1.00
 -12   5   8    1.70    1.10
 -12  -5  -8    2.70    1.50
  12   6   8   27.00    1.90
 -12  -6   8   24.00    1.60
 -12   6  -8   24.70    1.80
 -12  -6  -8   25.00    1.90
 -12   6   8   26.60    2.10
  12   7   8    5.50    1.00
 -12  -7   8    4.80    0.80
 -12  -7  -8    6.10    0.90
  12   8   8    0.40    1.10
 -12  -8   8    1.00    0.80
 -12  -8  -8    1.40    0.70
 -13   0   8   14.80    1.70
  13   0   8   13.80    1.50
 -13  -1   8  138.69    4.10
  13   1   8  137.09    4.30
 -13   1   8  137.99    4.10
  13  -1   8  141.59    4.30
 -13  -1  -8  137.59    4.10
  13   2   8   -1.00    1.00
 -13  -2   8   -0.70    1.00
 -13   2   8    0.50    1.00
 -13  -2  -8    0.50    1.10
 -13  -3   8   81.79    3.10
  13   3   8   79.79    3.10
 -13   3   8   84.69    3.00
  13   4   8    9.70    1.30
 -13   4   8   12.30    1.30
 -13   5  -8   10.60    1.70
  13   5   8    9.90    1.20
 -13   5   8   10.10    1.30
  13   6   8    8.20    1.00
 -13   6  -8   10.50    1.10
 -13   6   8   10.00    1.20
 -13  -7   8    4.00    0.80
  13   7   8    4.70    0.90
  14   0   8   13.80    1.80
 -14   0  -8   16.60    1.60
 -14   0   8   15.60    1.60
 -14  -1   8    4.10    1.00
 -14   1  -8    6.60    1.10
  14   1   8    4.60    1.10
 -14  -1  -8    4.00    1.00
 -14   1   8    4.00    1.00
  14  -1   8    2.60    1.30
  14   2   8    5.90    1.20
 -14   2  -8    5.60    1.10
 -14  -2   8    3.90    1.00
 -14   2   8    5.20    1.00
 -14  -2  -8    7.80    1.20
  14   3   8    1.10    1.00
 -14  -3   8    0.90    1.40
 -14   3  -8   -0.60    0.80
 -14   3   8    0.90    0.90
 -14   4  -8    2.10    0.90
  14   4   8    0.90    0.90
 -14   4   8    1.50    0.90
  14   5   8   37.70    1.80
 -14   5  -8   37.60    1.80
 -14   5   8   39.40    1.80
  14   6   8    0.70    0.70
 -14   6  -8    1.20    0.80
 -14   6   8    1.20    0.90
  14   7   8    2.30    0.90
 -15   0  -8   17.20    1.60
 -15   0   8   18.10    1.60
  15   0   8   19.70    1.80
 -15  -1   8   28.60    1.70
 -15   1  -8   28.00    1.80
  15   1   8   27.80    1.90
 -15  -1  -8   27.00    1.70
 -15   1   8   28.50    1.80
  15  -1   8   31.10    2.20
 -15   2  -8   14.60    1.50
  15   2   8   13.80    1.60
 -15  -2   8   14.90    1.60
 -15  -2  -8   14.60    1.70
 -15   2   8   14.90    1.50
  15   3   8    2.50    0.90
 -15   3  -8    3.40    1.30
 -15   4  -8    2.00    0.80
  15   4   8    2.10    0.80
 -15   4   8    2.30    0.80
 -15   5  -8    0.80    0.70
  15   5   8    0.90    0.70
 -15   5   8    1.10    0.70
  15   6   8   44.60    1.60
 -15   6  -8   40.30    2.50
 -15   6   8   44.30    1.80
 -16   0   8    0.70    0.90
 -16   0  -8    0.30    0.70
  16   0   8   -0.40    0.90
 -16  -1   8    3.60    0.80
  16   1   8    4.20    1.00
 -16   1  -8    2.40    0.80
 -16   1   8    2.80    0.80
 -16  -1  -8    3.10    0.80
 -16  -2   8    6.10    0.90
 -16   2  -8    5.80    0.90
  16   2   8    6.70    1.00
 -16  -2  -8    5.20    1.00
 -16   2   8    6.00    0.90
 -16   3  -8    1.00    0.70
  16   3   8    0.30    0.70
 -16   3   8    0.60    0.70
 -16   4  -8    4.60    0.70
  16   4   8    2.70    0.70
 -16   4   8    3.90    0.70
 -16   5  -8   -0.20    0.60
  16   5   8    0.90    0.60
 -16   5   8    1.80    0.60
  17   0   8    4.70    1.00
 -17   0  -8    4.40    0.70
 -17   0   8    2.60    0.70
  17   1   8   -1.40    0.70
 -17  -1   8    0.70    0.70
 -17   1  -8    0.40    0.60
 -17   1   8   -0.10    0.60
 -17  -1  -8    0.20    0.70
 -17   2  -8    2.10    0.70
  17   2   8    1.90    0.70
 -17  -2   8    1.30    0.90
 -17   2   8    3.70    0.70
  17   3   8    1.40    0.60
 -17   3  -8    0.90    0.60
 -17   3   8    1.10    0.60
  17   4   8    2.40    0.60
 -17   4  -8    3.20    0.60
 -17   4   8    2.80    0.60
 -18   0  -8   18.60    1.10
 -18   0   8   16.50    1.10
  18   1   8   25.20    1.30
 -18   1  -8   23.10    1.20
 -18  -1   8   21.50    1.20
 -18   1   8   22.20    1.20
  18   2   8   10.00    1.00
 -18   2  -8    8.20    0.90
 -18   2   8    8.70    0.90
 -18   3  -8   20.80    1.00
  18   3   8   22.60    1.10
 -18   3   8   21.40    1.10
   0   0   9   -0.20    1.30
   0   0  -9   -0.90    1.90
   0   1   9    0.60    1.20
   0   1  -9    1.40    2.10
   0  -1   9    1.30    1.40
   0  -1  -9   -0.70    2.30
   0   2   9 1883.71   40.70
   0  -2   9 1934.91   40.80
   0   2  -9 1812.62   41.20
   0  -2   9 1838.92   39.50
   0   3   9   -1.80    1.90
   0  -3   9   -0.20    1.50
   0   3   9   -1.60    1.40
   0   4   9  215.18    6.60
   0  -5   9   -0.20    1.10
   0   5   9    1.90    2.70
   0  -6  -9  162.78    5.50
   0  -6   9  164.68    4.60
   0  -7   9    0.30    0.90
   0  -7  -9    0.10    1.30
   0  -8  -9   91.69    3.60
   0  -8   9   94.29    3.00
   0  -9   9    1.50    0.80
   0  -9  -9    0.30    0.80
   0 -10   9    4.50    0.80
   0 -10  -9    3.30    0.80
   1   0   9    1.00    1.40
  -1   0   9   -0.50    1.30
   1   0  -9    1.80    2.20
  -1   0  -9   -1.80    2.00
  -1  -1   9   97.49    3.90
   1  -1  -9   96.29    5.30
  -1  -1   9  108.19    4.20
  -1   1  -9  101.99    5.20
   1   1   9   95.59    4.10
   1   1  -9  103.79    5.40
  -1   1   9  112.89    4.30
  -1  -1  -9  100.59    5.20
   1  -1   9  102.89    4.10
  -1  -2   9  186.18    5.00
  -1   2  -9  185.68    7.00
   1   2   9  188.88    5.90
   1   2   9  200.28    6.00
  -1  -2   9  188.98    6.00
   1  -2   9  189.08    5.90
  -1   2   9  179.18    5.90
  -1  -3   9   63.49    3.70
   1   3   9   58.59    3.40
   1   3   9   48.60    3.90
  -1   3  -9   61.69    5.50
  -1  -3   9   56.39    2.60
  -1   3   9   51.79    3.30
   1  -3   9   57.29    3.60
   1   4   9  374.76    9.90
  -1   4   9  380.16    9.80
   1   5   9   39.70    4.70
  -1  -5   9   39.00    2.20
   1  -5   9   36.50    2.40
  -1   5   9   35.00    4.50
  -1  -5  -9   38.20    3.20
  -1  -6   9   22.00    1.90
   1  -6  -9   20.90    2.90
   1  -6   9   18.70    2.00
  -1  -6  -9   16.90    2.70
  -1  -7   9    1.80    0.90
   1  -7  -9    2.30    1.40
   1  -7   9    3.40    1.00
  -1  -7  -9    2.10    1.40
  -1  -8   9   52.09    2.20
   1  -8  -9   52.49    2.80
  -1  -8  -9   52.09    2.80
   1  -8   9   54.89    2.30
   1  -9  -9    1.80    0.90
  -1  -9   9    3.20    0.80
   1  -9   9    1.20    0.80
  -1  -9  -9    0.60    0.90
  -1 -10   9    0.70    0.60
   1 -10  -9    0.80    0.80
  -1 -10  -9   -0.60    0.60
  -2   0   9    2.10    1.50
  -2   0  -9    0.60    2.30
   2   0   9   -1.20    1.20
   2   0   9    1.10    1.10
  -2  -1   9  487.55   12.10
  -2   1  -9  472.45   12.50
  -2  -1   9  481.85   11.30
  -2  -1  -9  455.85   12.50
   2  -1   9  482.15   10.80
   2  -1   9  475.15   11.90
   2   2   9   37.60    3.00
   2   2   9   38.40    3.10
  -2  -2   9   42.50    3.20
  -2   2  -9   33.90    3.40
  -2  -2   9   38.90    2.60
   2  -2   9   42.00    3.10
  -2   2   9   37.50    3.20
  -2   3  -9   65.99    5.90
  -2  -3   9   72.29    3.40
   2   3   9   70.89    4.30
   2   3   9   71.59    3.90
  -2  -3   9   74.99    4.00
  -2   3   9   68.19    3.80
   2  -3   9   72.19    4.10
  -2  -4   9    6.40    1.30
   2   4   9    8.80    2.20
  -2   4   9    7.70    2.10
  -2  -5   9    7.60    1.10
   2   5   9    8.50    3.10
  -2  -5  -9    8.30    1.90
   2  -6  -9    0.90    1.70
  -2  -6   9   -0.20    1.00
  -2  -6  -9    2.10    2.10
   2  -6   9   -1.00    1.10
   2  -7  -9   18.90    2.60
  -2  -7   9   21.50    1.70
  -2  -7  -9   19.40    2.40
   2  -7   9   22.60    1.90
  -2  -8   9    9.90    1.30
   2  -8  -9    9.60    1.50
  -2  -8  -9    6.90    1.30
   2  -8   9   11.00    1.80
   2  -9  -9    1.20    1.00
  -2  -9  -9    1.70    0.90
  -2 -10  -9    3.50    0.70
  -3   0   9    0.80    1.50
  -3   0  -9    0.10    2.20
   3   0   9    1.50    1.40
  -3   0   9   -0.40    1.40
   3   0   9    0.70    1.10
  -3   1  -9  278.57    9.00
   3   1   9  288.77    8.10
   3   1   9  286.77    7.70
  -3  -1   9  292.27    7.70
  -3  -1   9  294.07    8.40
  -3   1   9  295.87    8.30
   3  -1   9  294.47    6.90
   3  -1   9  291.47    8.20
  -3  -2   9   74.19    4.10
   3   2   9   74.89    3.70
  -3  -2   9   77.99    3.60
  -3   2  -9   76.79    5.50
   3   2   9   73.99    3.90
  -3   2   9   71.89    3.90
   3  -2   9   75.79    4.00
   3   3   9    2.90    2.10
  -3  -3   9    0.00    2.00
  -3  -3   9    1.30    2.00
  -3   3  -9   -2.90    3.50
   3   3   9    1.50    1.70
  -3   3   9    1.70    1.70
   3  -3   9    3.30    2.10
   3   4   9   -0.10    2.30
  -3  -4   9    2.50    1.10
  -3   4   9    3.70    2.30
  -3  -5   9   28.60    2.00
   3  -5   9   24.20    2.20
  -3  -5  -9   28.80    2.90
   3  -6  -9   19.30    2.30
  -3  -6   9   18.70    1.70
  -3  -6  -9   19.00    2.60
   3  -6   9   15.40    1.80
  -3  -7   9    1.30    0.90
   3  -7  -9    3.70    1.60
  -3  -7  -9    3.80    1.40
   3  -7   9    2.30    1.30
  -3  -8   9    3.20    0.80
   3  -8  -9    5.20    1.40
  -3  -8  -9    2.30    1.10
   3  -9  -9    4.00    1.10
  -3 -10   9   40.80    1.50
  -3 -10  -9   33.90    1.50
  -4   0   9    1.10    1.80
  -4   0  -9   -0.10    2.80
   4   0   9    2.40    1.50
  -4   0   9    1.90    1.80
   4   0   9   -0.20    1.20
   4   1   9  373.16    9.40
  -4   1  -9  361.16   11.00
   4   1   9  374.86    9.90
  -4  -1   9  352.56    9.60
   4  -1   9  368.46    8.50
  -4   1   9  372.26   10.10
   4  -1   9  374.66    9.90
   4   2   9  407.36   10.50
  -4  -2   9  402.66   10.90
  -4   2  -9  394.36   11.70
   4   2   9  397.56   10.30
  -4  -2   9  381.06   10.20
   4  -2   9  395.76   10.60
  -4   2   9  388.56   10.60
  -4  -3   9   92.29    5.30
   4   3   9   94.29    4.70
  -4  -3   9   89.09    5.10
   4   3   9   87.69    5.00
  -4   3   9   93.59    4.70
   4  -3   9   85.79    5.00
  -4  -4   9    7.90    1.30
   4   4   9    9.40    2.80
  -4   4   9    9.70    2.60
  -4  -5   9  123.49    3.90
   4  -5  -9  118.89    5.20
  -4  -5  -9  127.79    4.70
  -4  -6   9   52.09    2.30
   4  -6  -9   53.49    3.80
  -4  -6  -9   54.89    3.10
   4  -7  -9   22.70    3.00
  -4  -7   9   26.10    1.70
  -4  -7  -9   29.30    2.40
  -4  -8   9    1.00    0.80
  -4  -8  -9    1.20    1.00
  -4  -9   9    3.20    0.70
  -4  -9  -9    0.20    0.70
  -4 -10   9    1.70    0.60
  -4 -10  -9    0.40    0.50
  -5   0   9    2.40    1.80
   5   0   9   -0.50    1.30
   5   0   9    1.20    1.70
  -5   0   9    0.50    2.20
   5   1   9   64.29    3.30
  -5   1  -9   76.49    7.10
  -5  -1   9   62.99    4.30
  -5  -1   9   75.99    4.60
   5   1   9   67.19    4.20
   5  -1   9   68.39    4.20
  -5   1   9   73.39    4.30
   5  -1   9   65.59    2.60
   5   2   9  158.78    6.00
  -5   2  -9  154.48    8.70
  -5  -2   9  164.38    6.50
  -5  -2   9  161.98    6.60
   5   2   9  160.18    5.80
   5  -2   9  163.68    6.30
  -5   2   9  156.48    6.10
   5   3   9   77.29    5.00
  -5  -3   9   73.79    6.60
  -5  -3   9  108.49    9.70
  -5  -3   9   76.69    3.30
   5  -3   9   78.79    5.20
  -5   3   9   72.29    5.10
  -5  -4   9   30.40    2.10
   5   4   9   23.70    2.90
  -5  -4  -9   32.10    3.10
  -5   4   9   19.80    3.30
  -5  -5   9    4.20    1.00
   5   5   9   -0.50    2.40
  -5  -5  -9    2.70    1.70
  -5  -6   9    1.40    0.90
  -5  -6  -9    0.80    1.30
  -5  -7   9    2.30    0.90
  -5  -7  -9    0.50    1.20
  -5  -8   9   42.40    1.90
  -5  -8  -9   45.50    2.50
  -5  -9   9    7.80    1.10
  -5 -10  -9    8.80    0.90
   6   0   9    2.20    1.60
   6   0   9    0.50    1.80
  -6   0   9    1.50    2.20
   6   1   9   28.50    3.10
   6   1   9   36.00    3.90
  -6  -1   9   28.70    3.10
   6  -1   9   31.00    2.40
  -6   1   9   33.90    4.20
   6  -1   9   35.80    4.00
   6   2   9   58.89    4.30
  -6  -2   9   59.79    5.20
   6   2   9   57.69    4.60
   6  -2   9   55.69    4.80
  -6   2   9   53.39    4.80
   6   3   9   11.10    2.30
   6   3   9   13.30    3.00
  -6  -3   9    6.20    1.50
  -6  -3   9    6.50    3.30
  -6   3   9    7.70    3.00
  -6  -4   9    1.70    1.00
   6   4   9    1.00    1.90
  -6  -4  -9    0.90    1.70
  -6   4   9   -0.90    2.10
  -6  -5   9    1.80    1.00
   6   5   9    1.20    2.20
  -6  -5  -9    0.30    1.40
   6   6   9   36.60    3.60
  -6  -6   9   32.20    2.00
  -6  -6  -9   30.80    2.60
  -6  -7   9    4.10    0.90
  -6  -7  -9    8.00    1.40
  -6  -8   9  217.68    5.50
  -6  -8  -9  223.98    6.00
  -6  -9  -9    7.80    1.10
  -6 -10   9   11.30    0.90
  -6 -10  -9    9.30    0.80
   7   0   9   -0.70    2.30
  -7   0   9    5.10    2.90
   7   0   9    0.40    1.80
  -7  -1   9   11.90    3.00
   7   1   9   14.20    2.10
   7   1   9   15.10    2.50
   7   1   9   16.60    3.00
  -7   1   9   12.10    2.90
   7  -1   9   10.70    2.60
   7   2   9  245.08    8.70
  -7  -2   9  264.37    7.30
  -7  -2   9  263.37    9.40
   7   2   9  240.68    7.00
  -7   2   9  234.08    6.70
  -7   2   9  250.17    9.10
   7  -2   9  264.77    9.00
   7   3   9   29.10    3.10
  -7  -3   9   28.60    3.90
  -7  -3   9   21.40    2.20
  -7  -3  -9   25.90    3.70
  -7   3   9   24.60    2.90
  -7  -4   9   28.00    2.10
   7   4   9   24.30    2.40
  -7  -4  -9   29.80    3.20
  -7   4   9   24.90    3.10
   7   5   9    1.90    1.90
  -7  -5   9    1.40    1.00
  -7  -5  -9    1.50    1.40
  -7  -6   9    3.80    1.00
   7   6   9    4.40    1.80
  -7  -6  -9    2.50    1.30
  -7  -7   9    4.80    0.90
  -7  -7  -9    6.90    1.30
  -7  -8   9   22.60    1.60
  -7  -8  -9   21.70    1.90
  -7  -9  -9    0.90    0.70
   8   0   9    2.10    3.00
  -8   0   9    4.10    3.50
   8   0   9    0.90    2.60
  -8   0   9    2.70    1.30
  -8  -1   9    1.30    3.70
   8   1   9    2.40    1.50
   8   1   9    1.60    3.00
   8   1   9    5.10    3.40
  -8  -1   9    0.80    1.20
   8  -1   9    2.90    1.80
  -8   1   9    4.40    1.40
   8  -1   9    1.10    3.30
  -8  -2   9   12.70    1.70
   8   2   9    9.80    1.80
  -8  -2   9   11.70    4.50
  -8   2   9   11.40    1.60
   8  -2   9   11.70    2.30
   8  -2   9    4.00    3.90
   8   3   9   -2.40    1.50
  -8  -3   9    2.40    1.80
  -8  -3  -9    0.60    2.20
  -8   3   9   -2.60    1.40
  -8  -4   9  108.29    3.60
   8   4   9  107.79    4.10
  -8   4   9  107.09    4.10
  -8  -4  -9  106.49    4.30
   8   5   9   72.59    3.60
  -8  -5   9   76.79    2.90
  -8  -5  -9   71.49    3.50
  -8   5   9   77.89    3.80
  -8  -6   9  134.89    4.00
   8   6   9  134.59    4.50
  -8  -6  -9  135.59    4.50
   8   7   9    2.20    1.60
  -8  -7   9    3.30    0.90
  -8  -7  -9    1.60    1.10
  -8  -8   9   22.90    1.40
  -8  -8  -9   19.20    1.60
  -8  -9  -9   11.60    1.10
  -9   0   9   -0.80    1.10
   9   0   9   -0.30    1.50
   9   1   9   53.59    3.10
  -9  -1   9   55.99    2.70
  -9   1   9   54.99    2.80
   9  -1   9   57.89    3.20
   9  -1   9   53.19    7.70
  -9  -2   9   99.59    3.70
  -9  -2   9  103.29    3.60
   9   2   9  102.49    3.90
  -9   2   9   99.09    3.60
   9  -2   9   99.99    4.50
  -9  -3   9    5.80    1.60
   9   3   9    4.80    1.50
  -9  -3  -9    4.90    2.20
  -9   3   9    4.10    1.40
   9   4   9   25.50    2.50
  -9  -4   9   20.90    2.00
  -9  -4  -9   24.60    2.90
  -9   4   9   28.20    2.50
  -9  -5   9    2.50    1.00
   9   5   9    3.20    1.40
  -9  -5  -9    2.40    1.40
  -9   5   9    2.90    1.50
   9   6   9    3.20    1.40
  -9  -6   9    1.90    0.90
  -9  -6  -9    1.10    1.10
   9   7   9   -2.60    1.40
  -9  -7   9    1.70    0.80
  -9  -7  -9   -0.30    0.90
  -9  -8   9    3.10    0.70
  -9  -8  -9    0.10    0.70
  -9  -9   9    2.50    0.60
  -9  -9  -9    1.90    0.60
  10   0   9   -0.40    1.30
 -10   0   9   -1.60    1.00
  10   1   9    0.90    1.30
 -10  -1   9    0.20    1.10
 -10   1   9    2.50    1.10
  10  -1   9   -1.70    1.40
 -10  -2   9   18.00    2.00
  10   2   9   14.70    1.80
 -10   2   9   11.60    1.40
  10  -2   9   14.70    2.00
  10   3   9   -1.30    1.20
 -10  -3   9    0.30    1.50
 -10  -3   9   -3.40    1.80
 -10   3   9   -0.20    1.20
 -10  -3  -9   -0.30    1.80
  10   4   9    0.60    1.20
 -10   4   9    0.80    1.20
 -10  -4  -9   -2.50    1.70
  10   5   9    3.70    1.20
 -10  -5   9    1.90    1.00
 -10   5   9    3.80    1.40
 -10  -5  -9    4.40    1.40
  10   6   9   18.20    2.00
 -10  -6   9   11.30    1.50
 -10  -6  -9   14.20    1.90
 -10   6   9   15.80    1.80
 -10  -7   9   14.30    1.40
  10   7   9   12.20    1.40
 -10  -7  -9   14.70    1.60
 -10  -8   9    8.20    1.10
 -10  -8  -9    5.30    0.80
  11   0   9    0.30    1.50
 -11   0   9    0.10    1.00
  11   1   9   19.10    2.20
 -11  -1   9   19.30    1.90
 -11   1   9   18.40    1.90
  11   2   9  119.09    4.10
 -11  -2   9  113.09    3.80
 -11   2   9  118.49    3.90
 -11  -2  -9  120.49    3.80
  11  -2   9  120.59    4.50
  11   3   9    2.50    1.20
 -11  -3   9    2.50    1.40
 -11  -3   9    3.50    1.50
 -11   3   9    3.70    1.10
 -11  -3  -9    1.90    1.80
  11   4   9   11.90    1.50
 -11  -4   9    7.00    1.30
 -11  -4  -9   10.70    2.00
 -11   4   9   10.40    1.40
  11   5   9    1.20    1.10
 -11  -5   9   -1.30    1.00
 -11  -5  -9   -0.60    1.40
 -11   5   9   -0.80    1.10
  11   6   9    1.90    1.20
 -11  -6   9   -0.10    1.00
 -11   6   9    3.60    1.30
 -11  -6  -9    2.40    1.40
 -11  -7   9    1.20    0.80
  11   7   9    1.00    1.00
 -11  -7  -9    0.30    0.80
 -11  -8   9    4.90    0.70
 -11  -8  -9    4.60    0.70
 -12   0   9   -1.20    0.90
  12   0   9   -0.60    1.10
  12   1   9    0.10    1.10
 -12  -1   9    1.90    1.00
 -12   1   9    0.60    1.00
  12  -1   9    0.30    1.30
  12   2   9   16.50    2.00
 -12  -2   9   14.40    1.80
 -12   2   9   14.30    1.80
 -12  -2  -9   13.30    1.40
  12   3   9   78.69    3.20
 -12  -3   9   75.99    3.10
 -12   3   9   84.09    3.00
  12   4   9  170.28    5.00
 -12  -4   9  175.68    4.70
 -12   4   9  174.68    4.80
  12   5   9    7.40    1.20
 -12  -5   9    9.30    1.50
 -12   5   9    9.30    1.20
 -12   6  -9   23.10    1.70
  12   6   9   23.00    1.80
 -12  -6   9   27.30    1.60
 -12  -6  -9   26.40    2.00
 -12   6   9   25.80    2.00
 -12  -7   9    0.50    0.60
  12   7   9    1.30    0.90
 -12  -7  -9    0.50    0.80
 -12  -8   9    4.80    0.70
 -12  -8  -9    4.10    0.70
 -13   0   9   -0.10    0.90
  13   0   9   -1.30    1.00
 -13  -1   9    1.40    0.90
  13   1   9    1.40    1.10
  13  -1   9    2.60    1.30
 -13   1   9    1.10    0.90
 -13  -1  -9    0.90    0.90
 -13  -2   9   12.60    1.70
  13   2   9   12.20    1.40
 -13  -2  -9   14.20    1.80
 -13   2   9   11.20    1.30
 -13  -3   9   -2.70    1.20
  13   3   9    1.80    1.00
 -13   3   9   -0.40    0.90
  13   4   9   12.60    1.70
 -13   4   9   12.50    1.60
 -13  -5   9   27.40    1.90
 -13   5  -9   24.50    1.60
  13   5   9   20.60    1.70
 -13   5   9   22.20    1.70
 -13   6  -9    5.00    0.90
  13   6   9    5.30    0.90
 -13   6   9    5.90    1.00
  13   7   9   -0.80    0.70
 -13  -7   9    1.80    0.70
 -14   0   9   -0.90    0.80
  14   0   9    0.80    1.00
 -14   0  -9   -0.10    0.90
 -14   1  -9   37.10    2.00
 -14  -1   9   39.50    2.00
  14   1   9   40.10    2.20
 -14  -1  -9   33.50    1.90
  14  -1   9   36.60    2.30
 -14   1   9   37.80    2.00
  14   2   9   -0.50    0.90
 -14  -2   9    1.40    0.90
 -14  -2  -9    1.70    1.00
 -14   2   9   -1.30    0.80
  14   3   9    2.10    1.00
 -14   3   9    1.80    0.90
 -14   4  -9    1.00    0.90
  14   4   9    0.70    1.60
 -14   4   9    0.10    0.80
 -14   5  -9    6.50    0.90
  14   5   9    5.10    0.90
 -14   5   9    3.90    0.90
 -14   6  -9   11.50    1.20
  14   6   9   12.50    1.20
 -14   6   9   12.80    1.40
  14   7   9    1.20    0.70
 -15   0  -9   -0.30    0.80
 -15   0   9    0.10    0.80
  15   0   9    0.00    1.00
 -15   1  -9    1.80    0.80
 -15  -1   9    4.70    0.90
  15   1   9    2.60    1.00
  15  -1   9    2.90    1.30
 -15   1   9    1.30    0.80
 -15  -1  -9    3.80    0.90
  15   2   9   11.80    1.50
 -15   2  -9   13.70    1.40
 -15  -2   9   11.80    1.40
 -15   2   9    8.70    1.10
 -15  -2  -9    9.80    1.10
  15   3   9    4.70    1.00
 -15   3  -9    3.30    0.80
 -15   3   9    5.60    0.90
  15   4   9    2.90    0.80
 -15   4  -9    0.80    0.70
 -15   4   9    0.70    0.70
  15   5   9    6.00    0.80
 -15   5  -9    8.10    1.10
 -15   5   9    8.10    1.10
 -15   6  -9    5.00    0.70
  15   6   9    5.20    0.70
 -15   6   9    4.80    0.80
  16   0   9   -0.10    0.90
 -16   0  -9    1.00    0.70
 -16   0   9    0.80    0.70
  16   1   9   26.90    1.60
 -16  -1   9   30.40    1.60
 -16   1  -9   29.50    1.60
 -16   1   9   29.20    1.60
 -16  -1  -9   28.50    1.50
 -16   2  -9   27.30    1.50
 -16  -2   9   27.60    1.60
  16   2   9   26.40    1.50
 -16   2   9   26.00    1.50
 -16  -2  -9   22.20    1.70
  16   3   9   20.90    1.40
 -16   3  -9   21.30    1.30
 -16   3   9   20.10    1.30
  16   4   9   59.99    2.00
 -16   4  -9   59.99    1.90
 -16   4   9   58.59    2.00
 -16   5  -9    4.30    0.60
  16   5   9    4.00    0.60
 -16   5   9    5.70    0.70
  17   0   9    0.30    1.00
 -17   0  -9    0.10    0.60
 -17   0   9    0.10    0.60
  17   1   9   -0.30    0.70
 -17   1  -9    0.20    0.60
 -17  -1   9   -0.70    0.70
 -17   1   9    0.40    0.60
 -17  -1  -9   -0.60    0.70
 -17   2  -9   -0.70    0.50
  17   2   9    0.50    0.70
 -17   2   9    0.00    0.60
 -17   3  -9   14.60    1.00
  17   3   9   12.40    1.10
 -17   3   9   13.10    1.00
 -17   4  -9    2.50    0.50
  17   4   9    1.80    0.50
 -17   4   9    1.50    0.60
 -18   0   9   -0.40    0.50
 -18   0  -9   -0.50    0.50
 -18  -1   9   -0.40    0.70
  18   1   9    2.10    0.80
 -18   1  -9    0.70    0.50
 -18  -1  -9   -0.10    0.70
 -18   1   9    0.70    0.50
 -18   2  -9   23.50    1.10
  18   2   9   21.00    1.70
 -18   2   9   25.20    1.10
   0   0 -10  326.47   10.10
   0  -1  10   -0.10    1.60
   0   1 -10    2.50    3.10
   0   1  10    0.50    1.50
   0   2  10   29.80    3.00
   0  -2  10   24.60    2.10
   0   2 -10   29.10    3.50
   0  -2  10   24.00    3.20
   0   3  10   -0.50    1.80
   0   3  10    1.30    2.50
   0  -3  10    1.20    2.00
   0  -4  10   29.20    2.40
   0   4  10   39.40    4.30
   0  -5  10   -2.00    1.00
   0  -6  10   45.40    2.70
   0  -6 -10   46.00    3.10
   0  -7  10    0.70    0.90
   0  -7 -10   -0.10    1.30
   0  -8 -10   44.00    2.60
   0  -8  10   52.59    2.30
   0  -9 -10    1.00    0.80
   0  -9  10    1.40    0.70
   0 -10 -10    1.40    0.70
   0 -10  10    0.90    0.60
   1   0 -10  252.57    9.00
  -1   0  10  255.07    8.40
  -1   0 -10  259.57    8.90
  -1  -1  10   78.89    3.50
   1   1  10   83.79    3.70
  -1   1 -10   82.09    5.80
  -1  -1  10   78.69    4.10
   1   1  10   81.69    4.10
  -1   1  10   79.59    4.10
   1  -1  10   81.99    4.00
   1   2  10   36.20    3.30
  -1  -2  10   34.50    2.60
   1   2  10   34.40    3.20
  -1  -2  10   37.20    3.50
  -1   2 -10   33.80    3.90
  -1   2  10   39.10    3.30
   1  -2  10   33.50    3.40
   1   3  10   30.20    4.20
   1   3  10   27.00    3.40
  -1  -3  10   27.50    3.90
   1  -3  10   26.80    3.90
  -1   3  10   28.60    3.40
  -1  -4  10   16.80    1.70
   1   4  10   17.20    2.70
  -1   4  10   15.60    2.60
   1  -4  10   13.30    1.80
  -1  -5  10   46.00    2.40
   1  -5  10   43.80    2.50
  -1  -6  10   25.90    1.90
   1  -6 -10   21.90    2.70
   1  -6  10   23.20    2.90
  -1  -6 -10   24.60    2.80
   1  -7 -10   18.80    2.40
  -1  -7  10   20.20    1.70
   1  -7  10   22.20    1.90
  -1  -7 -10   19.00    2.40
   1  -8 -10    8.80    1.40
   1  -8  10   10.80    1.60
   1  -9 -10    5.50    1.00
  -1  -9 -10    6.30    1.00
   1  -9  10    5.80    0.80
   1 -10 -10    0.90    0.80
  -1 -10  10    0.10    0.80
  -1 -10 -10    0.10    0.60
   2   0  10    7.20    1.80
  -2   0 -10    3.80    3.10
   2   0  10    6.90    1.40
  -2   0  10    3.60    1.70
   2   1  10  993.00   22.70
  -2  -1  10  993.30   22.00
   2   1  10  999.10   22.30
  -2   1 -10  947.71   23.50
  -2  -1  10  992.60   23.20
   2  -1  10  993.60   21.50
   2  -1  10  986.50   22.70
  -2   1  10  986.30   22.80
   2   2  10  146.39    5.30
  -2  -2  10  131.89    4.70
   2   2  10  140.19    5.20
  -2  -2  10  137.09    5.50
  -2   2 -10  127.59    7.40
  -2   2  10  139.39    5.40
   2  -2  10  140.89    5.40
  -2  -3  10  263.87    8.20
   2   3  10  255.07    7.80
   2   3  10  259.07    8.30
  -2   3  10  252.47    7.80
   2  -3  10  251.37    8.00
   2   4  10   26.90    3.10
  -2  -4  10   31.00    2.20
  -2   4  10   34.80    4.40
  -2  -5  10   15.50    1.70
   2  -5  10   14.60    1.70
  -2  -5 -10   12.80    1.90
  -2  -6  10   26.10    1.80
   2  -6 -10   24.80    3.00
   2  -6  10   23.90    3.00
  -2  -6 -10   25.80    2.60
  -2  -7  10  163.18    4.50
   2  -7 -10  161.68    5.20
  -2  -7 -10  162.58    5.20
   2  -7  10  164.38    4.60
   2  -8 -10   75.49    3.20
  -2  -8  10   81.59    2.70
  -2  -8 -10   74.89    3.20
   2  -8  10   74.69    2.70
   2  -9 -10    1.10    1.00
  -2  -9 -10    1.40    0.80
  -2 -10  10   -0.60    0.50
  -2 -10 -10    0.60    0.60
  -3   0  10    5.60    2.00
  -3   0  10    6.10    2.00
   3   0  10    9.60    2.00
   3   0  10    6.60    1.50
   3   1  10   42.70    3.10
  -3   1 -10   46.00    6.10
  -3  -1  10   42.00    3.50
   3   1  10   45.60    3.40
  -3  -1  10   41.60    3.70
  -3   1  10   44.80    3.60
   3  -1  10   44.90    2.30
   3   2  10   13.90    2.30
  -3  -2  10   14.00    2.30
  -3   2 -10   15.00    4.00
   3   2  10   16.80    2.30
   3  -2  10   16.90    2.50
  -3   2  10    9.00    2.10
  -3  -3  10   77.99    5.10
   3   3  10   66.39    4.70
   3   3  10   74.29    4.80
  -3   3  10   69.79    4.70
   3  -3  10   75.49    5.10
  -3  -4  10   58.29    2.70
   3   4  10   68.39    5.20
  -3   4  10   57.79    5.00
  -3  -5  10    0.00    0.90
  -3  -5 -10    0.50    1.50
   3  -5  10    2.00    1.60
   3  -6 -10   20.40    2.90
  -3  -6  10   19.20    1.80
   3  -6  10   17.40    2.30
  -3  -6 -10   17.70    2.40
  -3  -7  10    3.40    0.90
   3  -7 -10    2.90    1.60
   3  -7  10    5.50    1.30
  -3  -7 -10    2.50    1.20
   3  -8 -10    6.20    1.40
  -3  -8 -10    6.30    1.30
   3  -9 -10   -0.10    1.10
  -3 -10  10   -0.10    0.50
  -3 -10 -10    0.60    0.60
  -4   0  10  166.88    6.20
  -4   0  10  181.98    6.40
   4   0  10  174.78    6.20
   4   0  10  175.68    5.20
  -4  -1  10   41.80    4.10
  -4  -1  10   47.70    4.20
   4   1  10   51.79    3.80
   4   1  10   44.10    3.10
   4  -1  10   47.30    2.40
   4  -1  10   49.50    4.00
  -4   1  10   45.40    4.00
   4   2  10   21.40    2.50
  -4   2 -10   15.10    4.50
  -4  -2  10   17.80    2.60
   4   2  10   21.20    2.70
  -4  -2  10   19.90    2.90
   4  -2  10   19.20    4.20
  -4   2  10   15.00    2.60
  -4  -3  10   30.40    2.30
   4   3  10   42.00    4.60
  -4  -3  10   33.90    3.80
   4  -3  10   35.00    3.50
  -4   3  10   30.80    4.50
   4   4  10    8.70    2.30
  -4  -4  10    5.70    1.20
  -4   4  10    6.50    3.30
   4   5  10   29.80    2.80
  -4  -5  10   32.10    2.10
  -4  -5 -10   30.90    2.90
  -4  -6  10  115.59    3.70
   4  -6 -10  114.19    4.70
  -4  -6 -10  117.99    4.40
   4  -7 -10   73.19    3.70
  -4  -7  10   76.99    2.80
  -4  -7 -10   74.89    3.30
   4  -8 -10   26.70    3.30
  -4  -8  10   33.00    1.80
  -4  -8 -10   27.60    2.10
  -4 -10 -10    0.10    0.50
   5   0  10   59.19    3.30
  -5   0  10   70.89    4.50
   5   0  10   69.59    4.50
   5   1  10   27.80    3.00
  -5  -1  10   37.30    4.20
   5   1  10   26.60    3.20
   5  -1  10   33.50    2.30
   5  -1  10   28.40    3.00
  -5   1  10   32.70    4.20
  -5  -2  10   92.79    5.70
   5   2  10   97.09    5.20
   5   2  10   82.79    5.00
  -5   2  10   88.99    5.50
   5  -2  10   84.99    5.50
  -5  -3  10   42.60    5.90
   5   3  10   29.00    3.60
  -5  -3  10   32.10    2.30
   5   3  10   36.50    3.60
  -5   3  10   36.60    5.10
   5   4  10    4.00    2.00
  -5  -4  10    0.40    1.00
  -5  -4 -10    1.90    1.80
  -5   4  10    4.70    2.10
  -5  -5  10   13.00    1.90
   5  -5 -10   15.00    2.50
   5   5  10   14.10    2.30
  -5  -5 -10   12.20    2.10
  -5  -6  10   28.20    1.90
  -5  -6 -10   28.30    2.50
  -5  -7  10   27.80    1.80
  -5  -7 -10   26.10    2.30
  -5  -8  10   12.40    1.40
  -5  -8 -10    9.50    1.30
  -5  -9 -10    8.10    1.20
  -5 -10  10    7.00    0.80
  -5 -10 -10    8.80    0.80
   6   0  10  673.03   15.60
  -6   0  10  672.13   17.20
   6   0  10  675.63   17.00
  -6  -1  10   10.00    3.00
   6   1  10    7.10    2.30
   6   1  10    6.40    2.20
   6   1  10    7.70    2.60
   6  -1  10   11.40    2.80
  -6   1  10    5.00    2.80
   6   2  10   56.49    5.60
  -6  -2  10   64.49    5.90
  -6  -2  10   54.49    2.90
   6   2  10   68.39    5.10
   6   2  10   66.99    3.60
  -6   2  10   54.99    5.70
  -6   2  10   58.19    3.30
   6  -2  10   58.69    5.40
   6   3  10    1.20    1.80
  -6  -3  10   -1.00    1.20
  -6   3  10    4.20    1.80
   6   4  10    9.80    1.90
  -6  -4  10    6.40    1.20
  -6  -4 -10    8.30    1.90
  -6   4  10    4.70    1.90
   6   5  10   85.59    4.20
  -6  -5  10   88.79    3.10
  -6  -5 -10   87.49    3.90
   6   6  10  136.59    5.00
  -6  -6  10  142.29    4.10
  -6  -6 -10  144.29    4.80
  -6  -7  10   93.89    3.00
  -6  -7 -10   98.29    3.70
  -6  -8  10    3.30    1.10
  -6  -9 -10    6.70    1.10
  -7   0  10   -0.70    3.20
   7   0  10   -1.00    2.30
   7   0  10    1.00    1.60
   7   0  10   -3.30    2.90
  -7   0  10    0.90    1.30
   7   1  10   72.69    5.00
  -7  -1  10   84.09    3.40
  -7  -1  10   96.79    6.90
   7   1  10   85.59    6.20
  -7   1  10   80.09    3.40
   7  -1  10   81.69    6.10
  -7   1  10   92.99    6.80
   7  -1  10   77.89    3.80
   7   2  10   47.70    3.10
  -7  -2  10   48.90    2.80
  -7  -2  10   50.29    2.90
  -7  -2  10   66.19    7.00
   7  -2  10   49.40    6.60
  -7   2  10   46.60    2.90
   7  -2  10   59.09    4.80
  -7  -3  10   65.69    3.00
  -7  -3  10   72.99    3.80
   7   3  10   76.19    3.60
  -7  -3 -10   77.29    4.20
  -7   3  10   73.49    3.40
  -7  -4  10    6.30    1.20
   7   4  10    3.70    1.70
  -7   4  10    8.50    1.80
  -7  -4 -10    8.10    1.80
   7   5  10   59.89    3.30
  -7  -5  10   60.59    2.50
  -7   5  10   62.29    3.60
  -7  -5 -10   57.29    3.20
   7   6  10   55.49    3.30
  -7  -6 -10   58.39    3.00
   7   7  10   57.09    3.20
  -7  -7  10   53.29    2.20
  -7  -7 -10   53.39    2.70
  -7  -8 -10    0.70    0.80
  -7  -9 -10    1.10    0.60
   8   0  10  176.28    5.40
  -8   0  10  179.08    5.10
   8   1  10    2.70    1.50
  -8  -1  10    9.20    1.90
  -8  -1  10    4.60    1.30
   8  -1  10    3.30    1.70
  -8   1  10    1.00    1.20
   8  -1  10    3.80    4.10
  -8  -2  10   23.40    2.30
   8   2  10   21.80    2.60
  -8  -2  10   28.20    2.40
  -8   2  10   26.10    2.30
   8  -2  10   19.50    2.40
  -8  -2 -10   26.90    3.30
  -8  -3  10   50.29    3.30
   8   3  10   53.79    3.10
  -8  -3  10   42.30    2.50
  -8  -3 -10   47.70    3.80
  -8   3  10   52.99    2.90
  -8  -4  10   -1.50    1.00
   8   4  10    4.10    1.50
  -8   4  10    1.60    1.50
  -8  -4 -10    0.80    1.70
   8   5  10   27.70    2.60
  -8  -5  10   28.90    1.90
  -8   5  10   26.40    2.80
  -8  -5 -10   28.50    2.60
   8   6  10   -1.70    1.30
  -8  -6  10    1.70    0.80
  -8  -6 -10   -0.70    1.10
   8   7  10    4.60    1.60
  -8  -7  10    4.00    0.90
  -8  -7 -10    3.50    1.10
  -8  -8 -10    1.00    0.80
  -8  -9  10    4.40    0.70
  -8  -9 -10    2.30    0.60
   9   0  10  132.79    4.40
  -9   0  10  127.59    4.10
   9   1  10    6.60    1.50
  -9  -1  10    4.90    1.20
   9  -1  10    2.90    1.60
  -9   1  10    2.50    1.10
  -9  -2  10    3.20    1.20
   9   2  10   -0.60    1.30
   9  -2  10    1.20    1.90
  -9   2  10   -0.20    1.10
  -9  -3  10    0.70    1.50
  -9  -3  10   -1.50    1.20
   9   3  10    0.60    1.20
  -9   3  10    1.90    1.80
  -9  -3 -10    0.40    2.00
  -9  -4  10   70.39    2.80
   9   4  10   71.09    3.30
  -9  -4 -10   72.99    3.60
  -9   4  10   70.59    3.10
  -9  -5  10    7.10    1.10
   9   5  10    9.50    1.50
  -9   5  10    9.50    1.50
  -9  -5 -10    8.90    1.50
   9   6  10   -2.00    1.10
  -9  -6  10    0.50    0.90
  -9  -6 -10    0.20    1.10
   9   7  10   34.30    2.30
  -9  -7  10   38.70    2.10
  -9  -7 -10   37.20    2.10
  -9  -8  10    2.30    0.80
  -9  -8 -10    1.00    0.70
  -9  -9  10    0.30    0.50
  -9  -9 -10    1.10    0.50
 -10   0  10  326.87    8.10
  10   0  10  323.17    8.30
 -10  -1  10    0.30    1.10
  10   1  10    0.40    1.60
  10  -1  10    0.30    1.40
 -10   1  10   -0.10    1.20
  10   2  10  199.38    5.70
 -10  -2  10  199.38    5.50
 -10  -2  10  182.28    6.70
 -10   2  10  199.78    5.40
  10  -2  10  199.68    5.80
  10   3  10   25.80    2.30
 -10  -3  10   29.80    2.50
 -10  -3  10   26.80    2.20
 -10   3  10   26.40    2.20
 -10  -4  10   53.19    2.40
  10   4  10   60.49    2.90
 -10  -4 -10   58.99    3.40
 -10   4  10   56.09    2.70
  10   5  10   25.00    2.10
 -10  -5  10   20.80    1.80
 -10   5  10   21.80    2.10
 -10  -5 -10   28.60    2.50
 -10  -6  10    5.30    1.10
  10   6  10    5.40    1.20
 -10  -6 -10    7.80    1.30
  10   7  10    4.00    1.10
 -10  -7  10    4.30    0.90
 -10  -7 -10    4.40    1.00
 -10  -8  10    2.10    0.70
 -10  -8 -10    3.10    0.70
 -11   0  10    1.70    0.90
  11   0  10    0.90    1.30
 -11  -1  10    0.60    1.00
  11   1  10    0.10    1.20
 -11   1  10    0.40    0.90
  11  -1  10    1.20    1.40
 -11  -2  10   40.80    2.30
  11   2  10   35.20    2.50
  11  -2  10   39.60    3.10
 -11   2  10   38.00    2.20
 -11  -3  10    4.50    1.40
  11   3  10   -1.00    1.10
 -11   3  10    2.00    1.00
  11   4  10    1.80    1.10
 -11  -4  10    2.60    1.10
 -11  -4 -10    3.10    1.80
 -11   4  10    1.50    1.00
 -11  -5  10   63.19    2.40
  11   5  10   68.89    2.80
 -11  -5 -10   60.19    3.00
 -11   5  10   67.19    2.70
 -11  -6  10   34.40    1.80
  11   6  10   32.50    2.00
 -11  -6 -10   30.70    2.00
 -11   6  10   28.30    2.20
  11   7  10    0.60    0.90
 -11  -7  10    0.90    0.70
 -11  -7 -10    0.90    0.80
 -11  -8  10   17.60    1.00
 -12   0  10  131.59    4.00
  12   0  10  128.99    4.10
  12   1  10   67.79    2.90
 -12  -1  10   67.39    2.70
  12  -1  10   65.89    2.90
 -12   1  10   64.39    2.70
 -12  -2  10  112.89    3.50
  12   2  10  106.49    3.80
 -12   2  10  112.89    3.60
 -12  -2 -10  110.89    3.60
  12   3  10    7.10    1.30
 -12  -3  10    8.60    1.40
 -12   3  10    7.00    1.20
  12   4  10    5.30    1.20
 -12   4  10    7.10    1.10
 -12  -5  10   20.70    1.60
  12   5  10   16.60    1.70
 -12   5  10   20.60    2.40
 -12  -5 -10   17.80    2.70
  12   6  10    7.10    1.00
 -12  -6  10    7.60    1.20
 -12   6  10    8.40    1.20
 -12  -6 -10    6.00    1.20
  12   7  10   15.40    1.40
 -12  -7  10   14.80    1.10
 -12  -7 -10   14.10    1.30
 -13   0  10    1.90    0.90
  13   0  10    1.50    1.10
 -13  -1  10    3.60    1.00
  13   1  10    5.80    1.20
  13  -1  10    2.50    1.30
 -13  -1 -10    5.00    1.00
 -13   1  10    2.60    1.00
  13   2  10    3.00    1.00
 -13  -2  10    2.20    1.00
 -13   2  10    2.10    0.90
 -13  -2 -10    3.10    1.10
 -13  -3  10   17.00    2.10
  13   3  10   16.80    1.80
 -13   3  10   20.00    1.70
  13   4  10   16.60    1.70
 -13   4  10   17.20    1.60
 -13   6 -10   23.00    1.50
 -13  -6  10   24.70    1.40
  13   6  10   25.00    1.40
 -13   6  10   18.40    1.60
  13   7  10    2.70    1.10
  14   0  10    8.00    1.20
 -14   0 -10    6.50    1.00
 -14   0  10    6.00    1.00
 -14  -1  10   11.20    1.40
 -14   1 -10    9.10    1.20
  14   1  10    9.80    1.30
 -14  -1 -10   12.20    1.50
 -14   1  10   12.30    1.50
  14  -1  10   15.60    2.00
  14   2  10   17.80    1.70
 -14  -2  10   15.90    1.60
 -14  -2 -10   21.50    1.80
 -14   2  10   19.20    1.60
  14   3  10    4.20    1.00
 -14   3  10    5.20    1.00
  14   4  10   11.20    1.40
 -14   4 -10   12.40    1.30
 -14   4  10   11.50    1.30
  14   5  10   17.10    1.30
 -14   5 -10   17.30    1.30
 -14   5  10   14.80    1.30
  14   6  10    6.30    0.80
 -14   6 -10    6.50    0.80
 -14   6  10    5.30    1.60
 -15   0 -10   14.40    1.40
 -15   0  10   15.40    1.40
  15   0  10   16.00    1.70
 -15   1 -10    8.00    1.00
 -15   1  10    7.20    1.00
 -15  -1 -10    8.10    1.10
  15  -1  10    8.80    1.40
  15   2  10    5.30    1.00
 -15  -2  10    7.30    1.00
 -15   2 -10    6.10    1.00
 -15   2  10    5.90    1.00
 -15  -2 -10    5.90    1.00
  15   3  10   -0.30    0.70
 -15   3 -10   -1.20    0.70
 -15   3  10    0.70    0.70
 -15   4 -10    1.30    0.70
  15   4  10    0.90    0.70
 -15   4  10    1.50    0.70
  15   5  10   -0.10    0.60
 -15   5 -10    0.00    0.60
 -15   5  10    1.60    0.70
  16   0  10   -0.40    0.90
 -16   0  10   -0.40    0.60
 -16   0 -10    1.70    0.70
  16   1  10    8.40    1.00
 -16  -1  10    7.00    0.90
 -16   1 -10    9.00    1.10
 -16  -1 -10    9.30    1.20
 -16   1  10    6.90    0.90
  16   2  10   10.70    1.20
 -16  -2  10    9.30    1.00
 -16   2 -10   10.10    1.10
 -16   2  10   10.80    1.10
 -16   3 -10    1.70    0.70
  16   3  10    2.50    0.70
 -16   3  10    2.80    0.70
  16   4  10    4.00    0.70
 -16   4 -10    4.10    0.60
 -16   4  10    4.10    0.70
  16   5  10    4.40    0.60
 -16   5 -10    4.10    0.70
 -16   5  10    5.10    0.70
 -17   0 -10   22.10    1.20
 -17   0  10   22.00    1.20
  17   1  10    0.10    0.70
 -17  -1  10   -0.60    0.60
 -17   1 -10    0.10    0.60
 -17  -1 -10   -1.30    0.70
 -17   1  10   -0.40    0.60
  17   2  10    2.40    0.70
 -17   2 -10    1.70    0.60
 -17   2  10    2.80    0.60
  17   3  10    1.80    0.60
 -17   3 -10    3.90    0.60
 -17   3  10    2.10    0.60
 -18   0  10    3.40    0.60
 -18   0 -10    3.40    0.90
 -18   1 -10    0.80    0.50
 -18  -1  10   -0.40    0.80
 -18   1  10    0.90    0.50
   0   0  11   -3.90    1.70
   0  -1  11    0.90    1.80
   0  -1  11   -2.60    1.70
   0   1  11   -2.20    1.80
   0   2 -11  200.58   10.10
   0  -2  11  221.48    5.90
   0   2  11  222.48    7.20
   0  -3  11    2.30    2.60
   0   3  11   -0.90    2.20
   0   4  11  182.28    8.20
   0  -4  11  141.59    4.60
   0  -5  11   -1.40    1.10
   0  -6  11   15.50    1.90
   0  -6 -11   19.00    2.50
   0  -7 -11   -1.20    1.20
   0  -7  11    3.50    1.10
   0  -8 -11   24.50    2.10
   0  -8  11   29.30    1.80
   0  -9 -11   -0.60    0.80
   0  -9  11   -0.60    0.60
   0 -10 -11    8.30    1.00
   1   0  11    2.70    1.90
   1   0  11    2.00    1.70
  -1   0  11   -1.60    1.70
  -1  -1  11  718.93   17.70
   1   1  11  734.63   17.60
  -1  -1  11  729.93   16.80
   1   1  11  749.03   17.30
   1  -1  11  721.73   16.50
  -1   1  11  726.83   17.70
   1  -1  11  739.23   17.70
   1   2  11  408.66   10.90
  -1  -2  11  413.16   11.10
   1   2  11  409.86   10.90
  -1  -2  11  392.56    9.80
  -1   2 -11  361.36   13.00
  -1   2  11  406.26   10.90
   1  -2  11  403.06   14.00
   1   3  11   24.30    3.00
  -1  -3  11   13.90    2.10
  -1  -3  11   21.80    3.10
  -1   3  11   20.10    2.80
   1  -3  11   20.50    3.20
  -1  -4  11   14.50    1.60
   1   4  11   11.90    2.50
   1  -4  11   13.60    2.10
  -1   4  11   16.20    3.40
  -1  -5  11   -0.80    1.00
   1  -5  11   -1.50    1.20
  -1  -6  11    6.30    1.20
   1  -6 -11    2.20    1.60
   1  -6  11    3.40    1.20
  -1  -6 -11    3.80    1.50
   1  -7 -11   34.80    2.60
  -1  -7  11   44.30    2.10
   1  -7  11   44.00    2.20
  -1  -7 -11   39.50    2.70
  -1  -8  11   44.40    2.10
   1  -8 -11   35.60    2.30
  -1  -8 -11   33.50    2.20
   1  -8  11   34.80    1.90
   1  -9 -11   13.70    1.50
  -1  -9  11   11.70    1.20
   1  -9  11   11.90    1.10
  -1  -9 -11   13.10    1.40
   1 -10 -11   27.40    1.30
  -1 -10  11   27.30    1.10
  -2   0  11   -3.20    1.80
   2   0  11    0.00    1.70
   2   0  11    1.80    1.80
   2   1  11    5.50    2.00
  -2  -1  11    6.90    2.20
   2   1  11    1.50    1.80
  -2  -1  11    7.90    2.20
   2  -1  11    5.10    1.40
  -2   1  11    4.50    1.90
   2  -1  11    4.60    2.10
   2   2  11  206.98    7.10
  -2  -2  11  204.58    7.30
   2   2  11  211.28    7.10
  -2  -2  11  197.48    6.40
   2  -2  11  209.48    7.20
  -2   2  11  204.58    7.10
   2   3  11  391.56   11.20
  -2  -3  11  398.26   11.70
  -2  -3  11  393.56    9.60
   2  -3  11  414.16   11.60
  -2   3  11  402.56   11.20
  -2  -4  11   29.80    2.20
   2   4  11   28.40    3.80
   2  -4  11   33.70    2.40
  -2   4  11   31.90    3.10
  -2  -5  11   10.90    1.70
   2   5  11   15.40    3.60
   2  -5  11   11.30    1.60
  -2  -6  11  123.39    3.70
   2  -6 -11  115.19    4.50
  -2  -6 -11  117.39    4.50
   2  -6  11  119.89    3.80
  -2  -7  11    3.70    1.00
   2  -7 -11    1.70    1.40
  -2  -7 -11    0.10    1.20
   2  -7  11    1.10    1.00
   2  -8 -11    7.40    1.40
   2  -8  11    9.60    1.60
  -2  -8 -11    9.80    1.40
   2  -9 -11    2.00    0.90
  -2  -9  11    0.80    0.70
  -2  -9 -11    1.00    0.80
  -2 -10  11    4.30    0.70
  -2 -10 -11    3.50    0.60
  -3   0  11   -1.10    1.90
   3   0  11   -3.10    1.60
  -3   0  11   -1.50    2.40
   3   0  11    1.10    2.00
  -3  -1  11 1722.33   39.30
   3   1  11 1793.32   40.00
   3   1  11 1823.22   39.40
  -3  -1  11 1831.92   40.20
   3  -1  11 1823.82   40.10
   3  -1  11 1836.22   38.50
  -3   1  11 1774.12   40.10
   3   2  11  109.29    5.50
  -3  -2  11  107.89    5.50
   3   2  11  109.29    5.70
  -3  -2  11  113.59    5.80
  -3   2  11  113.89    5.60
   3  -2  11  112.39    5.80
   3   3  11   26.80    3.30
  -3  -3  11   40.30    5.60
  -3  -3  11   22.00    2.30
   3   3  11   27.60    3.00
  -3   3  11   28.10    3.30
   3   4  11    1.00    2.00
  -3   4  11    4.50    2.30
   3  -4  11    7.00    1.60
   3   5  11    3.20    2.30
  -3  -5  11    4.50    1.10
  -3  -5 -11    3.50    1.60
   3  -5  11    5.40    1.40
  -3  -6  11   47.30    2.20
   3  -6 -11   40.50    3.10
   3  -6  11   46.70    2.40
  -3  -6 -11   41.60    2.90
   3  -7 -11  142.69    4.60
  -3  -7  11  136.89    3.90
  -3  -7 -11  135.99    4.60
   3  -7  11  131.29    3.90
   3  -8 -11    1.90    1.30
  -3  -8 -11    1.20    1.00
  -3  -9  11   41.60    1.70
  -3  -9 -11   37.70    1.90
  -3 -10  11   45.60    1.50
  -3 -10 -11   46.80    1.60
  -4   0  11   -1.90    2.20
   4   0  11    3.50    2.20
   4   0  11    2.00    1.80
   4   1  11  740.43   18.40
  -4  -1  11  777.82   18.80
   4   1  11  741.73   17.70
   4  -1  11  755.32   16.70
   4  -1  11  767.92   18.50
  -4   1  11  755.32   18.70
  -4  -2  11  139.29    7.00
  -4  -2  11  153.88    6.90
  -4  -2  11  144.89    4.50
   4   2  11  157.08    6.60
   4   2  11  155.68    6.30
   4  -2  11  152.48    6.60
  -4   2  11  145.39    6.60
  -4  -3  11   93.29    3.40
   4   3  11  101.09    4.30
  -4  -3  11   99.49    6.60
  -4   3  11   92.49    4.30
  -4  -4  11   75.49    2.90
   4   4  11   77.29    4.00
  -4   4  11   67.39    4.20
   4   5  11   12.90    2.20
  -4  -5  11   13.00    1.70
  -4  -5 -11   12.40    1.90
  -4  -6  11   61.89    2.50
   4  -6 -11   56.99    3.40
  -4  -6 -11   57.09    3.20
   4  -7 -11    3.20    1.70
  -4  -7 -11    2.70    1.20
   4  -8 -11    6.50    1.60
  -4  -8 -11    8.70    1.30
  -4  -9  11    5.10    0.80
  -4  -9 -11    2.60    0.80
   5   0  11   -0.90    2.70
   5   0  11   -1.90    2.10
  -5   0  11   -1.50    2.70
   5   1  11  476.55   13.10
   5   1  11  473.15   12.10
   5   1  11  454.05   11.40
  -5  -1  11  478.35   13.30
  -5   1  11  461.95   11.40
   5  -1  11  482.95   13.00
  -5   1  11  498.15   13.30
   5   2  11   96.79    7.10
   5   2  11   72.59    3.70
  -5  -2  11   76.19    6.10
  -5  -2  11   73.09    3.00
  -5  -2  11   71.49    4.20
   5   2  11   79.19    5.90
  -5   2  11   67.59    5.80
   5  -2  11   75.49    6.00
  -5   2  11   71.89    3.50
   5   3  11    0.00    1.70
  -5   3  11    0.30    1.60
   5   4  11  386.96    9.50
  -5  -4  11  358.96    8.80
  -5   4  11  357.96    9.30
  -5  -5  11   99.89    3.30
   5  -5 -11   96.79    4.40
   5   5  11   90.59    4.60
  -5   5  11   91.89    6.10
  -5  -5 -11  100.69    4.10
  -5  -6  11  123.89    3.70
   5   6  11  118.89    4.80
   5  -6 -11  124.79    4.80
  -5  -6 -11  121.79    4.40
  -5  -7  11   44.20    2.10
  -5  -7 -11   38.80    2.50
  -5  -8 -11    1.10    1.00
  -5  -9 -11    4.20    0.80
  -6   0  11   -1.80    3.10
   6   0  11    3.20    1.70
  -6   0  11    0.80    1.30
   6   0  11    4.60    3.00
   6   0  11   -1.50    3.20
  -6  -1  11    0.60    1.30
   6   1  11    1.10    1.60
   6   1  11    5.60    3.10
  -6  -1  11    3.70    1.50
  -6  -1  11   -3.80    3.30
   6   1  11   -0.90    2.70
   6  -1  11   -3.30    3.10
  -6   1  11    1.70    3.20
  -6   1  11   -1.30    1.30
   6  -1  11    2.40    1.80
  -6  -2  11  282.17   10.60
  -6  -2  11  276.57    7.00
  -6  -2  11  288.37    7.30
   6   2  11  276.37    7.40
   6  -2  11  267.77    7.70
   6  -2  11  276.37   10.00
  -6   2  11  270.67    7.20
  -6  -3  11   21.30    2.20
  -6  -3  11   18.00    2.00
   6   3  11   23.20    2.90
  -6   3  11   22.90    2.70
   6   4  11   27.50    3.00
  -6  -4  11   22.60    1.90
  -6   4  11   25.00    2.80
  -6  -4 -11   29.30    2.90
  -6  -5  11    0.10    0.90
   6   5  11   -0.20    1.60
  -6   5  11    3.00    1.90
  -6  -5 -11    1.40    1.40
   6   6  11   66.79    3.50
  -6  -6  11   76.69    2.80
  -6  -6 -11   75.99    3.30
  -6  -7  11   29.00    1.80
  -6  -7 -11   27.10    2.20
  -6  -8  11   48.20    2.00
  -6  -8 -11   39.00    2.20
  -6  -9  11    2.70    0.70
  -6  -9 -11    2.20    0.70
  -7   0  11    0.10    1.20
   7   0  11    3.00    1.60
   7   1  11    9.00    4.80
   7   1  11    9.50    1.70
  -7  -1  11    8.60    1.40
  -7   1  11    8.20    1.50
   7  -1  11    6.20    3.90
   7  -1  11    4.90    1.70
  -7  -2  11   53.49    2.90
   7   2  11   51.09    3.10
  -7  -2  11   56.79    2.70
  -7   2  11   49.60    2.80
   7  -2  11   55.79    3.90
   7   3  11    5.90    1.60
  -7  -3  11    7.50    1.80
  -7  -3  11    2.40    1.20
  -7   3  11    4.50    1.50
  -7  -3 -11    2.40    2.00
  -7  -4  11   73.49    2.90
   7   4  11   72.59    4.90
  -7  -4 -11   74.99    3.80
  -7   4  11   77.99    3.40
   7   5  11  217.98    6.30
  -7  -5  11  236.58    6.00
  -7   5  11  233.58    6.50
  -7  -5 -11  233.78    6.60
   7   6  11   12.10    1.70
  -7  -6  11   11.00    1.60
  -7  -6 -11    9.20    1.40
   7   7  11    1.40    1.60
  -7  -7 -11    1.00    1.00
  -7  -9  11    2.50    0.60
  -7  -9 -11    3.30    0.70
  -8   0  11    0.10    1.10
   8   0  11    1.00    1.40
  -8  -1  11   74.29    3.40
  -8  -1  11   68.29    3.00
   8   1  11   71.19    3.20
  -8   1  11   68.89    2.90
   8  -1  11   63.99    3.40
  -8  -2  11  152.38    4.50
  -8  -2  11  156.38    4.60
   8   2  11  149.99    4.90
  -8   2  11  151.08    4.50
   8  -2  11  142.69    5.10
  -8  -3  11   55.89    3.20
   8   3  11   48.70    3.30
  -8  -3  11   51.29    2.50
  -8  -3 -11   53.69    3.60
  -8   3  11   51.89    2.80
   8   4  11   31.30    2.60
  -8  -4  11   23.90    2.00
  -8  -4 -11   25.80    2.80
  -8   4  11   27.00    2.40
   8   5  11    2.20    1.30
  -8  -5  11   -0.50    0.90
  -8   5  11   -0.60    1.40
  -8  -5 -11   -0.90    1.20
   8   6  11    4.30    1.40
  -8  -6  11    3.10    1.00
  -8  -6 -11    4.20    1.30
   8   7  11   18.00    1.70
  -8  -7  11   20.10    1.70
  -8  -7 -11   14.30    2.40
  -8  -8  11   60.79    2.10
  -8  -8 -11   54.69    2.20
  -8  -9  11   -0.10    0.50
  -8  -9 -11    1.10    0.50
  -9   0  11   -0.90    1.00
   9   0  11   -0.30    1.30
  -9  -1  11    2.10    1.20
   9   1  11    3.50    1.30
   9  -1  11    5.00    1.60
  -9   1  11    4.30    1.20
   9   2  11   15.00    1.90
  -9  -2  11   13.90    1.50
   9  -2  11   14.20    2.00
   9   3  11    1.90    1.20
  -9  -3  11    2.10    1.20
  -9  -3 -11    2.70    1.90
  -9   3  11    1.80    1.20
  -9  -4  11  113.19    3.60
   9   4  11  111.49    4.00
  -9   4  11  117.69    3.90
  -9  -4 -11  112.99    4.30
  -9  -5  11   13.00    1.60
   9   5  11   13.40    1.60
  -9   5  11   15.60    1.60
  -9  -5 -11   16.40    2.20
   9   6  11    2.10    1.20
  -9  -6  11    1.00    0.90
  -9  -6 -11    2.30    1.10
  -9   6  11    0.20    1.40
  -9  -7  11    2.30    0.80
   9   7  11    2.10    1.10
  -9  -7 -11    1.20    0.90
  -9  -8  11    5.70    0.70
  -9  -8 -11    7.30    1.00
  10   0  11   -0.60    1.30
 -10  -1  11    7.00    1.30
  10   1  11    7.90    1.40
 -10   1  11    5.70    1.20
  10  -1  11    9.70    1.60
  10   2  11    4.60    1.30
 -10  -2  11    4.40    1.20
 -10  -2  11    8.90    1.70
 -10   2  11    1.40    1.00
  10  -2  11    2.50    1.70
  10   3  11    1.70    1.20
 -10  -3  11    4.40    1.40
 -10  -3  11    6.60    1.20
 -10  -3 -11    3.00    2.10
 -10   3  11    4.00    1.10
 -10  -4  11    1.00    1.00
  10   4  11    2.20    1.20
 -10  -4 -11    1.60    1.60
 -10   4  11    0.40    1.10
 -10  -5  11   10.40    1.50
  10   5  11    9.80    1.30
 -10   5  11    9.40    1.30
 -10  -5 -11   11.20    1.60
  10   6  11    1.90    1.70
 -10  -6  11    4.60    1.20
 -10  -6 -11    3.80    1.30
 -10   6  11    3.60    1.30
 -10  -7  11   -0.50    0.70
  10   7  11   -0.30    1.00
 -10  -7 -11    1.40    0.80
 -10  -8  11   15.10    1.00
 -10  -8 -11   17.70    1.10
 -11   0  11    0.80    1.00
  11   0  11    1.80    1.20
  11   1  11    1.40    1.20
 -11  -1  11    1.80    1.00
 -11   1  11    2.80    1.10
  11  -1  11    4.90    1.40
 -11  -2  11   48.30    2.40
  11   2  11   49.30    2.60
  11  -2  11   47.40    3.90
 -11   2  11   46.80    2.40
  11   3  11   11.00    1.50
 -11  -3  11   13.90    1.60
 -11   3  11   14.60    1.80
 -11  -4  11   39.80    2.10
  11   4  11   37.40    2.30
 -11  -4 -11   35.10    3.10
 -11   4  11   40.00    2.20
 -11  -5  11   10.20    1.40
  11   5  11    6.90    1.20
 -11   5  11    7.80    1.20
 -11  -5 -11    7.10    1.70
 -11  -6  11    3.70    0.80
  11   6  11    3.30    1.00
 -11   6  11    3.30    1.20
 -11  -6 -11    2.50    1.00
  11   7  11    8.10    1.10
 -11  -7  11    5.90    0.90
 -11  -7 -11    5.10    0.90
 -11  -8  11    3.40    0.60
 -11  -8 -11    2.60    0.60
 -12   0  11    0.70    0.90
  12   0  11    1.00    1.10
  12   1  11   46.80    2.50
 -12  -1  11   49.20    2.30
 -12   1  11   55.29    2.40
  12  -1  11   50.39    2.60
 -12  -2  11    5.20    1.10
  12   2  11    7.90    1.30
 -12  -2 -11    5.80    1.20
 -12   2  11    5.90    1.10
 -12  -3  11    4.40    1.30
  12   3  11    2.80    1.10
 -12   3  11    1.90    1.00
 -12  -4  11   23.40    1.90
  12   4  11   17.90    1.80
 -12   4  11   17.10    1.70
 -12  -5  11    8.70    1.30
  12   5  11    5.70    1.00
 -12   5  11    6.70    1.10
  12   6  11    4.00    0.90
 -12  -6  11    4.50    0.80
 -12   6  11    4.10    1.00
 -12  -6 -11    4.60    1.10
  12   7  11    1.10    0.80
 -12  -7  11    0.30    0.60
 -12  -7 -11    0.90    0.80
 -13   0  11    0.40    0.80
  13   0  11    0.20    1.00
  13   1  11    1.50    1.00
 -13  -1  11    2.20    0.90
 -13   1  11    1.90    0.90
  13  -1  11    0.70    1.20
 -13  -1 -11    0.90    0.90
  13   2  11   31.60    2.00
 -13  -2  11   31.20    1.90
 -13   2  11   27.10    1.80
 -13  -2 -11   27.20    1.90
  13   3  11   13.30    1.60
 -13   3  11   12.90    1.50
  13   4  11   12.20    1.80
 -13   4  11   13.10    1.50
  13   5  11   12.30    1.30
 -13   5  11   11.40    1.40
 -13   6 -11   14.40    1.30
  13   6  11   14.60    1.30
 -13   6  11   14.30    1.50
  13   7  11    9.80    1.00
  14   0  11    1.70    1.00
 -14   0 -11    1.00    0.80
 -14   0  11    0.80    0.80
  14   1  11   21.60    1.80
 -14  -1  11   22.00    1.60
 -14  -1 -11   20.40    1.60
 -14   1  11   23.00    1.60
  14   2  11    1.50    0.90
 -14  -2  11    0.90    1.30
 -14   2  11    3.60    0.90
 -14  -2 -11    1.30    1.00
  14   3  11   27.60    1.90
 -14   3  11   30.70    1.70
 -14   4 -11   23.60    1.40
  14   4  11   21.30    1.50
 -14   4  11   24.30    1.50
  14   5  11    1.30    0.70
 -14   5 -11    2.60    0.70
 -14   5  11    2.30    0.70
  14   6  11    5.00    0.70
 -14   6 -11    3.20    0.70
 -14   6  11    5.90    0.80
  15   0  11   -0.60    0.90
 -15   0 -11    1.60    0.80
 -15   0  11   -1.40    0.70
  15   1  11   -0.80    0.80
 -15  -1  11    0.60    0.70
 -15   1 -11    0.50    0.70
 -15   1  11    1.30    0.70
 -15  -1 -11    0.70    0.80
  15   2  11   -0.40    0.80
 -15  -2  11    0.90    0.80
 -15   2 -11    0.60    0.70
 -15   2  11   -0.20    0.70
 -15  -2 -11    1.60    1.00
 -15   3 -11    1.20    0.70
  15   3  11   -0.20    0.70
 -15   3  11    1.40    0.70
  15   4  11    7.90    1.00
 -15   4 -11    4.80    0.70
 -15   4  11    7.30    0.80
  15   5  11   23.10    1.20
 -15   5 -11   23.80    1.20
 -15   5  11   22.80    1.30
  16   0  11    1.00    0.90
 -16   0  11    0.20    0.60
 -16   0 -11    0.10    0.60
 -16  -1  11   23.70    1.40
 -16   1 -11   24.60    1.30
  16   1  11   24.10    1.40
 -16   1  11   24.20    1.30
 -16  -1 -11   21.80    1.30
 -16   2 -11    3.40    0.70
  16   2  11    3.00    0.70
 -16  -2  11    3.90    0.90
 -16   2  11    3.10    0.70
 -16   3 -11   18.90    1.10
  16   3  11   17.20    1.20
 -16   3  11   20.20    1.20
 -16   4 -11    1.70    0.50
  16   4  11    2.20    0.60
 -16   4  11    1.80    0.60
 -17   0 -11    0.10    0.60
 -17   0  11   -0.30    0.60
  17   1  11    4.20    0.80
 -17   1 -11    3.70    0.60
 -17  -1  11    3.30    0.70
 -17   1  11    3.20    0.60
 -17  -1 -11    5.40    1.30
  17   2  11    5.50    0.70
 -17   2 -11    5.20    0.60
 -17   2  11    6.40    0.70
 -17   3 -11    1.00    0.50
  17   3  11    0.70    0.60
 -17   3  11    0.40    0.50
   0   0  12  214.58    7.40
   0  -1  12    3.20    2.10
   0  -1  12   -2.70    2.30
   0   1  12    1.40    2.20
   0   2  12   -2.20    2.40
   0   2  12    0.20    2.80
   0  -2  12    1.40    2.30
   0   3  12    2.20    1.90
   0  -3  12    1.00    1.20
   0   4  12  101.09    4.50
   0  -4  12  112.89    3.60
   0   5  12   -3.70    2.10
   0  -5  12   -2.00    1.00
   0  -6  12   92.99    3.30
   0  -6 -12   92.09    3.90
   0  -7  12    1.30    1.00
   0  -7 -12   -0.70    1.20
   0  -8  12    0.60    0.80
   0  -8 -12    1.80    1.30
   0  -9  12   -0.60    0.60
   0  -9 -12    0.00    0.70
   1   0  12   40.50    3.40
  -1   0  12   35.20    4.30
   1   0  12   32.10    4.00
  -1  -1  12  205.98    6.90
   1   1  12  214.98    7.00
   1   1  12  216.98    7.50
  -1  -1  12  220.68    7.70
  -1   1  12  210.18    7.60
   1  -1  12  221.18    6.30
   1  -1  12  217.48    7.50
  -1  -2  12    0.60    2.60
  -1  -2  12    3.70    1.40
   1   2  12    1.10    2.50
   1   2  12   -2.70    2.90
   1  -2  12    2.00    2.60
  -1   2  12   -2.50    2.20
  -1  -3  12    2.90    1.20
   1   3  12   -1.30    1.80
  -1  -3  12    3.00    5.00
  -1   3  12   -2.30    1.90
   1  -3  12    3.00    1.30
  -1  -4  12  180.88    4.90
   1   4  12  166.48    5.70
  -1   4  12  160.88    5.60
   1  -4  12  180.28    4.90
   1   5  12  211.98    6.70
  -1   5  12  210.08    6.60
   1  -5  12  221.18    5.70
  -1  -6  12  193.18    5.10
   1  -6 -12  178.18    5.70
   1  -6  12  185.68    5.00
  -1  -6 -12  176.88    5.80
  -1  -7  12   11.40    1.70
   1  -7 -12    8.40    1.40
   1  -7  12    5.60    1.10
  -1  -7 -12    6.60    1.40
   1  -8 -12   44.00    2.60
   1  -8  12   40.40    1.80
  -1  -8 -12   41.90    2.40
   1  -9 -12    8.40    1.30
  -1  -9 -12    7.80    1.20
   1  -9  12    7.80    1.10
  -2   0  12  163.38    6.70
   2   0  12  171.48    5.60
   2   0  12  165.98    6.60
   2   1  12  125.59    5.40
  -2  -1  12  125.79    6.00
   2   1  12  131.49    6.20
  -2  -1  12  130.19    5.90
   2  -1  12  131.49    4.60
  -2   1  12  119.89    6.00
   2  -1  12  124.49    6.00
   2   2  12   68.19    5.30
  -2  -2  12   60.09    5.50
  -2  -2  12   68.89    2.90
   2   2  12   64.09    3.70
   2   2  12   67.89    5.30
  -2   2  12   66.39    5.40
   2  -2  12   68.29    5.40
   2   3  12    5.60    1.90
  -2  -3  12    6.50    1.20
   2  -3  12    7.00    1.40
  -2   3  12    7.20    1.90
   2   4  12   -0.60    1.90
  -2  -4  12   -0.90    1.00
   2  -4  12    0.50    1.30
  -2   4  12   -0.40    1.90
  -2  -5  12   80.99    3.10
   2   5  12   77.99    4.20
   2  -5  12   87.19    3.10
  -2   5  12   70.09    4.30
   2  -6 -12   38.90    2.90
  -2  -6  12   48.60    2.40
   2  -6  12   42.30    2.20
  -2  -6 -12   43.00    3.00
   2  -7 -12   11.40    1.60
  -2  -7 -12   13.30    2.00
   2  -7  12   10.80    1.60
  -2  -8  12    7.20    1.60
   2  -8 -12    6.00    1.20
  -2  -8 -12    8.80    1.60
   2  -8  12    8.10    1.20
  -2  -9  12   34.60    1.40
   2  -9 -12   38.90    1.70
  -2  -9 -12   38.20    1.80
  -3   0  12  762.32   18.90
   3   0  12  752.82   17.50
   3   0  12  762.22   18.80
   3   1  12    3.90    2.30
  -3  -1  12    0.90    2.70
   3   1  12    8.00    2.50
   3   1  12   10.00    2.80
  -3  -1  12    2.60    1.80
   3  -1  12   -4.90    2.80
  -3   1  12    3.40    2.60
  -3  -2  12    1.30    1.20
   3   2  12    0.80    1.70
  -3  -2  12    4.10    3.10
   3   2  12    0.20    3.90
   3   2  12    4.60    3.00
  -3   2  12    0.40    2.80
  -3   2  12    2.90    1.80
   3  -2  12    0.80    3.20
  -3  -3  12   32.70    2.10
   3   3  12   32.90    3.10
  -3   3  12   33.90    3.20
   3   4  12   47.10    3.30
  -3  -4  12   39.60    2.30
  -3   4  12   42.80    3.50
   3  -4  12   45.90    2.50
   3   5  12   13.90    2.30
  -3  -5  12   14.00    1.80
  -3   5  12   15.10    2.40
   3  -5  12   17.30    2.10
  -3  -5 -12   11.90    1.90
  -3  -6  12    6.10    1.10
   3  -6 -12    5.40    1.60
   3   6  12    7.40    2.30
   3  -6  12    9.20    1.30
  -3  -6 -12    7.40    1.50
   3  -7 -12    9.40    1.60
  -3  -7 -12    8.40    1.40
   3  -7  12    9.90    1.50
   3  -8 -12   -1.10    1.10
  -3  -8  12    1.00    0.90
  -3  -8 -12    0.10    1.00
  -3  -9  12   -0.30    0.50
  -3  -9 -12    0.40    0.70
   4   0  12  127.49    6.30
  -4   0  12  116.39    4.20
   4   0  12  118.99    4.50
  -4   0  12  127.09    6.50
   4   0  12  123.19    4.90
   4   1  12  294.67    9.80
  -4  -1  12  303.37   10.00
  -4  -1  12  285.77    7.50
   4   1  12  297.67    8.80
  -4  -1  12  294.97    7.50
   4   1  12  288.77    7.70
   4  -1  12  310.77    9.70
  -4   1  12  301.17    9.80
  -4   1  12  283.07    7.60
   4  -1  12  289.37    7.90
   4   2  12  126.09    4.50
  -4  -2  12  126.19    7.20
  -4  -2  12  128.59    4.00
  -4  -2  12  124.49    4.40
   4  -2  12  123.89    7.30
  -4   2  12  117.49    4.40
  -4  -3  12    0.40    1.00
   4   3  12    0.90    1.70
  -4   3  12    0.00    1.60
  -4  -4  12   15.30    1.60
   4   4  12   17.90    2.00
  -4   4  12   20.90    2.20
  -4  -5  12   -0.50    0.90
   4   5  12   -0.10    1.80
  -4   5  12    3.30    2.80
   4  -5  12    4.20    1.60
  -4  -5 -12   -0.30    1.40
   4   6  12    5.30    2.00
  -4  -6  12    7.50    1.20
   4  -6 -12    9.10    1.80
  -4  -6 -12    7.30    1.60
  -4  -7  12    4.00    1.10
   4  -7 -12    2.20    1.50
  -4  -7 -12   -0.20    1.00
   4  -8 -12   -1.30    1.40
  -4  -8  12    1.40    0.90
  -4  -8 -12   -0.40    0.90
  -4  -9  12   -0.90    0.50
  -4  -9 -12   -0.60    0.60
   5   0  12   15.70    3.80
  -5   0  12   19.80    3.30
   5   0  12   16.80    1.90
  -5   0  12   11.20    1.50
  -5  -1  12  164.38    5.00
  -5  -1  12  168.28    5.00
   5   1  12  155.88    6.90
   5   1  12  179.08    5.40
   5   1  12  208.68   11.30
  -5  -1  12  166.58    8.10
   5  -1  12  165.48    7.70
  -5   1  12  165.68    5.10
   5  -1  12  167.88    5.40
  -5  -2  12   11.80    1.70
  -5  -2  12    5.50    3.90
   5   2  12    7.50    1.70
  -5  -2  12   15.90    1.90
  -5   2  12   11.90    1.70
   5  -2  12    2.80    4.30
   5  -2  12   12.70    2.30
   5   3  12  157.88    5.10
  -5  -3  12  153.28    4.50
  -5  -3  12  162.78    5.30
  -5   3  12  155.48    4.90
  -5  -4  12   -0.20    1.20
   5   4  12    2.30    1.60
  -5   4  12    4.30    1.70
  -5  -5  12    1.80    1.10
   5   5  12    3.40    1.70
  -5  -5 -12    3.20    1.50
  -5   5  12    3.30    1.80
  -5  -6  12    7.80    1.20
   5  -6 -12    5.90    1.90
   5   6  12    7.00    1.80
  -5  -6 -12    8.30    1.60
  -5  -7  12   58.59    2.50
  -5  -7 -12   46.50    2.70
  -5  -8  12    9.60    1.40
  -5  -8 -12    5.40    1.10
  -5  -9  12   12.40    1.00
  -5  -9 -12   12.30    1.10
  -6   0  12    2.70    1.20
   6   0  12    5.70    1.60
  -6  -1  12    4.20    1.30
  -6  -1  12    5.00    1.50
   6   1  12    3.90    1.50
   6  -1  12    0.30    4.50
   6  -1  12    4.20    1.60
  -6   1  12    4.50    1.40
  -6  -2  12    4.20    1.20
   6   2  12    1.10    1.50
  -6  -2  12    2.70    1.40
  -6   2  12   -1.40    1.20
   6  -2  12    2.30    1.90
  -6  -3  12  149.88    5.00
   6   3  12  158.38    5.00
  -6  -3  12  151.48    4.50
  -6   3  12  155.08    4.80
   6   4  12   72.79    3.70
  -6  -4  12   73.79    2.90
  -6   4  12   75.39    3.60
  -6  -4 -12   73.19    3.70
   6   5  12    6.20    1.60
  -6  -5  12    5.70    1.20
  -6  -5 -12    6.70    1.50
  -6   5  12    9.80    1.80
   6   6  12    2.90    1.50
  -6  -6  12    2.50    1.00
  -6  -6 -12    2.80    1.20
   6   7  12    7.40    1.80
  -6  -7 -12    5.20    1.20
  -6  -8  12   27.50    1.50
  -6  -8 -12   24.60    1.70
  -6  -9  12   -0.30    0.50
  -6  -9 -12    1.90    0.60
   7   0  12   -1.10    1.40
  -7   0  12   -0.40    1.10
  -7  -1  12   46.80    2.60
   7   1  12   45.20    2.80
   7  -1  12   38.10    3.00
  -7   1  12   45.40    2.60
  -7  -2  12   40.00    2.40
  -7  -2  12   34.00    2.60
   7   2  12   36.40    2.80
  -7   2  12   33.40    2.40
   7  -2  12   40.90    3.40
   7   3  12   21.10    2.50
  -7  -3  12   22.40    2.80
  -7  -3  12   19.00    1.90
  -7   3  12   17.60    2.30
   7   4  12   35.00    2.70
  -7  -4  12   26.90    1.90
  -7  -4 -12   29.10    2.80
  -7   4  12   30.90    2.50
   7   5  12  291.57    7.50
  -7  -5  12  288.97    7.10
  -7   5  12  285.87    7.40
  -7  -5 -12  274.27    7.60
  -7  -6  12   52.69    2.30
   7   6  12   50.69    2.80
  -7  -6 -12   49.30    2.80
  -7   6  12   51.19    3.70
   7   7  12   17.60    2.40
  -7  -7  12   23.60    1.80
  -7  -7 -12   21.00    1.90
  -7  -8  12    2.20    0.70
  -7  -8 -12    2.10    0.80
  -7  -9  12    4.60    0.70
   8   0  12   -1.00    1.20
  -8   0  12   -0.60    1.10
  -8  -1  12   47.80    2.50
   8   1  12   43.40    2.80
  -8   1  12   45.70    2.50
   8  -1  12   44.50    2.90
   8   2  12    9.80    2.70
  -8  -2  12   10.30    1.50
  -8  -2  12   16.00    2.00
   8  -2  12   12.20    2.00
  -8   2  12    9.30    1.40
  -8  -3  12  115.89    4.20
  -8  -3  12  124.39    3.70
   8   3  12  116.49    4.10
  -8  -3 -12  115.09    4.60
  -8   3  12  112.59    3.90
   8   4  12   35.70    2.60
  -8  -4  12   36.50    2.10
  -8   4  12   43.80    2.50
  -8  -4 -12   38.50    2.90
  -8  -5  12    0.10    0.90
   8   5  12    0.90    1.10
  -8   5  12    0.30    1.20
  -8  -5 -12    1.40    1.20
   8   6  12   16.60    2.10
  -8  -6  12   17.20    1.70
  -8   6  12   18.60    2.50
  -8  -6 -12   18.30    2.00
   8   7  12   16.20    1.90
  -8  -7  12   11.10    1.40
  -8  -7 -12    9.60    1.50
  -8  -8  12    2.90    0.70
  -8  -8 -12    4.70    0.80
  -9   0  12    2.10    1.00
   9   0  12    4.40    1.70
  -9  -1  12    0.30    1.00
   9   1  12   -0.90    1.20
  -9   1  12    0.80    1.10
   9   2  12   23.10    2.30
  -9  -2  12   21.60    2.40
  -9  -2  12   20.90    2.10
  -9  -2 -12   25.30    3.90
  -9   2  12   20.40    2.00
   9   3  12    7.20    1.40
  -9  -3  12    7.60    1.50
  -9   3  12    7.30    1.20
  -9  -3 -12    8.80    2.00
  -9  -4  12   18.20    1.70
   9   4  12   18.40    2.10
  -9   4  12   18.30    2.00
  -9  -4 -12   15.20    2.40
   9   5  12    8.00    1.40
  -9  -5  12    6.20    1.00
  -9   5  12    6.40    1.20
  -9  -5 -12    7.40    1.40
   9   6  12   37.60    2.60
  -9  -6  12   35.90    1.80
  -9   6  12   35.70    2.60
  -9  -6 -12   36.20    2.20
   9   7  12   26.20    1.90
  -9  -7  12   22.60    1.40
  -9  -7 -12   22.00    1.60
  -9  -8  12   13.40    0.90
  -9  -8 -12   14.60    1.10
 -10   0  12   61.49    2.60
  10   0  12   61.39    3.00
  10   1  12    0.50    1.10
 -10  -1  12    1.60    1.00
 -10   1  12    2.10    1.00
  10  -1  12    2.20    1.30
 -10  -2  12    9.10    1.30
  10   2  12    8.00    1.40
  10  -2  12    8.50    1.80
 -10   2  12    8.30    1.30
 -10  -3  12   12.20    1.60
  10   3  12   11.70    1.50
 -10   3  12   13.60    1.80
 -10  -3 -12   12.10    2.10
  10   4  12   10.50    1.40
 -10  -4  12   14.60    1.60
 -10  -4 -12   11.40    1.80
 -10   4  12   10.20    1.30
  10   5  12    3.70    1.10
 -10  -5  12    2.90    0.90
 -10  -5 -12    4.10    1.30
 -10   5  12    2.70    1.10
  10   6  12   59.49    2.40
 -10  -6  12   58.89    2.10
 -10  -6 -12   59.39    2.50
 -10   6  12   63.49    2.60
  10   7  12    4.10    1.00
 -10  -7  12    3.30    0.70
 -10  -7 -12    4.30    0.90
 -10  -8  12    1.40    0.50
 -10  -8 -12    3.30    0.90
  11   0  12  364.36    9.00
 -11   0  12  377.36    9.00
  11   1  12   24.50    2.10
 -11  -1  12   22.10    1.80
  11  -1  12   25.80    2.40
 -11   1  12   20.50    1.80
 -11  -2  12  115.09    3.60
  11   2  12  113.59    3.90
 -11   2  12  117.09    3.70
 -11  -3  12    3.10    1.20
  11   3  12    1.20    1.10
 -11  -3  12   -0.40    1.30
 -11   3  12    0.20    0.90
 -11  -4  12    2.70    1.00
  11   4  12   -1.00    0.90
 -11  -4 -12   -1.80    1.60
 -11   4  12   -1.50    0.90
 -11  -5  12   67.89    2.40
  11   5  12   67.09    2.80
 -11  -5 -12   64.09    2.80
 -11   5  12   68.39    2.60
 -11  -6  12    2.80    0.70
  11   6  12    3.50    0.90
 -11  -6 -12    2.90    1.00
 -11   6  12    3.90    1.10
 -11  -7  12    4.30    0.60
 -11   7 -12    7.00    1.40
  11   7  12    5.50    0.90
 -11  -7 -12    5.60    0.90
 -12   0  12   49.90    2.30
  12   0  12   50.49    2.50
  12   1  12   23.80    2.00
 -12  -1  12   24.80    1.80
  12  -1  12   25.80    2.20
 -12   1  12   26.30    1.80
  12   2  12   -0.10    1.00
 -12  -2  12   -1.00    0.90
 -12   2  12    1.10    0.90
 -12  -2 -12    0.70    1.00
  12   3  12    3.40    1.00
 -12  -3  12   -0.60    1.60
 -12   3  12    3.30    1.00
  12   4  12   18.30    1.70
 -12   4  12   18.20    1.60
 -12  -5  12    1.10    0.90
  12   5  12   -0.70    0.80
 -12   5  12    0.70    0.90
  12   6  12   40.20    1.80
 -12  -6  12   37.10    1.50
 -12  -6 -12   35.30    2.00
 -12   6  12   38.10    1.80
  12   7  12    0.90    0.80
  13   0  12  124.29    3.80
 -13   0  12  128.89    3.80
 -13  -1  12   31.30    1.80
  13   1  12   27.40    1.90
  13  -1  12   30.70    2.20
 -13  -1 -12   29.90    1.80
 -13   1  12   28.50    1.80
  13   2  12   22.50    1.80
 -13  -2  12   24.30    1.70
 -13   2  12   22.80    1.70
 -13  -2 -12   21.90    1.90
  13   3  12    1.10    0.90
 -13   3  12    0.70    0.80
  13   4  12    1.40    0.80
 -13   4  12    2.60    0.80
  13   5  12   45.90    1.90
 -13   5  12   42.90    1.80
  13   6  12    5.40    0.80
 -13   6 -12    6.00    0.80
 -13   6  12    6.00    1.90
 -14   0  12   28.30    1.70
 -14   0 -12   29.70    1.70
  14   1  12    3.20    1.10
 -14  -1 -12    7.50    1.20
 -14   1  12    4.10    0.90
  14  -1  12    3.30    1.20
  14   2  12    1.30    0.90
 -14  -2  12    0.10    0.80
 -14  -2 -12    0.70    1.00
 -14   2  12    2.50    1.00
  14   3  12   10.10    1.30
 -14   3  12    9.00    1.00
 -14   4 -12    0.70    0.60
  14   4  12    1.00    0.70
 -14   4  12    1.80    0.70
 -14   5 -12    8.00    1.00
  14   5  12    8.50    1.00
 -14   5  12    7.00    0.90
  14   6  12    2.50    0.70
 -14   6 -12    3.20    0.60
 -14   6  12    3.50    0.80
 -15   0 -12    6.20    0.90
 -15   0  12    7.20    0.90
  15   0  12    7.30    1.00
  15   1  12   -0.40    0.80
 -15  -1  12    0.10    0.70
 -15   1 -12    1.10    0.70
 -15  -1 -12   -0.20    0.70
 -15   1  12   -0.90    0.60
 -15   2 -12    0.10    0.60
 -15  -2  12   -0.70    0.90
  15   2  12   -1.00    0.70
 -15   2  12   -0.30    0.60
 -15   3 -12   -0.30    0.60
  15   3  12   -0.20    0.60
 -15   3  12   -0.40    0.60
  15   4  12    1.20    0.60
 -15   4 -12   -0.70    0.50
 -15   4  12    1.10    0.60
  15   5  12    0.60    0.50
 -15   5 -12    0.40    0.50
 -15   5  12   -0.70    0.70
  16   0  12    6.80    1.10
 -16   0 -12    6.20    0.80
 -16   0  12    7.70    1.00
  16   1  12    0.60    0.70
 -16   1 -12    2.60    0.60
 -16  -1  12    0.80    0.70
 -16  -1 -12    0.10    0.70
 -16   1  12    1.00    0.60
  16   2  12   14.70    1.10
 -16   2 -12   11.60    1.00
 -16   2  12   12.80    1.00
  16   3  12    1.00    0.60
 -16   3 -12    0.10    0.50
 -16   3  12    0.50    0.50
 -16   4 -12    1.10    0.50
  16   4  12    0.80    0.50
 -16   4  12    0.70    0.50
 -17   0 -12   11.10    1.00
 -17   0  12   11.20    0.90
  17   1  12   -0.90    0.70
 -17   1 -12    1.00    0.50
 -17  -1  12   -0.20    0.70
 -17   1  12    0.80    0.50
 -17   2 -12   10.80    0.90
  17   2  12   11.30    1.20
 -17   2  12   10.90    0.90
   0   0  13    1.60    2.90
   0   0  13    2.00    1.50
   0  -1  13   -0.70    1.60
   0   1  13    4.10    3.10
   0   1  13   -0.50    1.50
   0  -1  13    4.40    3.10
   0   1  13   -2.70    2.60
   0  -2  13  165.18    7.70
   0  -2  13  152.58    5.30
   0  -2  13  168.98    4.80
   0   2  13  160.68    5.10
   0  -3  13    2.00    1.10
   0   3  13    1.60    1.60
   0   4  13  142.49    5.00
   0  -4  13  145.69    4.30
   0  -5  13    0.50    1.00
   0  -6 -13   68.79    3.30
   0  -6  13   65.99    2.60
   0  -7  13   -1.60    0.80
   0  -7 -13    0.50    1.10
   0  -8  13  221.48    5.40
   0  -8 -13  234.38    6.00
   0  -9 -13    1.20    0.70
   0  -9  13    0.20    0.60
  -1   0  13    1.40    2.80
  -1   0  13   -1.20    1.50
   1   0  13   -1.10    1.60
   1   0  13   -2.00    2.50
   1   0  13   -2.40    2.50
   1   1  13   10.10    2.90
   1   1  13    2.50    1.60
  -1  -1  13    1.10    1.60
  -1  -1  13    5.00    3.00
   1   1  13    8.70    3.00
   1  -1  13    0.80    1.70
  -1   1  13    1.20    1.50
  -1   1  13    9.60    3.30
   1  -1  13   -5.50    2.60
  -1  -2  13   71.79    2.90
  -1  -2  13   62.79    6.40
   1   2  13   69.59    3.60
  -1  -2  13   68.39    3.80
   1  -2  13   59.69    6.30
   1  -2  13   74.69    4.00
  -1   2  13   69.09    3.50
   1   3  13    5.50    1.70
  -1  -3  13    7.30    1.30
  -1   3  13    4.20    1.60
   1  -3  13    6.70    1.30
  -1  -4  13  147.39    4.30
   1   4  13  142.19    4.90
   1  -4  13  144.59    4.20
  -1   4  13  142.29    4.90
   1   5  13    8.20    2.40
  -1  -5  13    6.10    1.20
   1  -5  13    7.50    1.20
   1   6  13   21.70    3.30
   1  -6 -13   20.20    2.40
  -1  -6  13   20.00    1.80
  -1  -6 -13   15.60    2.40
   1  -6  13   14.70    1.70
  -1  -7  13   -1.40    0.80
   1  -7 -13   -0.10    1.10
  -1  -7 -13    0.50    1.10
   1  -7  13   -0.40    0.80
  -1  -8  13   10.10    1.20
   1  -8 -13   14.10    1.70
   1  -8  13   13.10    1.20
  -1  -8 -13   12.80    1.70
   1  -9 -13    1.30    0.80
  -1  -9  13    0.40    0.50
  -1  -9 -13    1.80    0.70
  -2   0  13    1.30    3.00
  -2   0  13   -0.10    1.40
   2   0  13    3.60    2.90
   2   0  13    2.80    2.50
   2   0  13    1.70    1.50
  -2  -1  13   85.99    3.60
   2   1  13   88.49    3.70
  -2  -1  13   92.49    6.50
   2   1  13   91.09    5.60
   2   1  13   90.69    6.30
  -2   1  13   85.49    6.40
   2  -1  13   84.49    6.40
  -2   1  13   85.19    3.60
   2  -1  13   86.29    3.80
   2   2  13    1.20    1.60
  -2  -2  13    2.40    3.70
  -2  -2  13   -0.40    1.70
  -2  -2  13    3.10    1.10
  -2   2  13    2.90    1.50
   2  -2  13    1.90    3.50
   2  -2  13   -0.30    2.00
   2   3  13  250.57    6.80
  -2  -3  13  249.08    6.30
  -2   3  13  234.28    6.70
   2  -3  13  244.98    6.40
  -2  -4  13    0.60    1.00
   2   4  13    1.20    1.70
  -2   4  13    1.70    1.70
   2  -4  13    0.50    1.10
  -2  -5  13   -1.00    1.00
   2   5  13   -1.20    1.70
   2  -5  13    1.40    1.10
  -2   5  13    0.30    1.80
   2  -6 -13    5.00    1.40
  -2  -6  13    1.40    1.00
   2   6  13   -0.90    1.90
   2  -6  13    3.40    1.00
  -2  -6 -13    1.30    1.30
  -2  -7  13   27.90    1.80
   2  -7 -13   30.50    2.30
   2  -7  13   26.90    1.70
  -2  -7 -13   26.40    2.20
   2  -8 -13   47.80    2.20
  -2  -8  13   43.80    1.80
  -2  -8 -13   47.90    2.30
   2  -9 -13    3.60    0.90
  -2  -9  13    3.10    0.60
  -2  -9 -13    4.20    0.80
   3   0  13   -3.00    3.20
   3   0  13   -0.30    3.40
  -3   0  13    2.80    3.20
  -3   0  13    0.50    1.30
   3   0  13   -0.30    1.50
  -3  -1  13   13.30    1.70
  -3  -1  13    7.10    3.50
   3   1  13   11.00    3.50
   3   1  13    8.40    1.60
   3   1  13   12.00    5.10
   3  -1  13   10.50    1.90
   3  -1  13   15.70    3.90
  -3   1  13   10.50    1.60
  -3  -2  13  213.98    6.20
   3   2  13  222.08    6.30
  -3  -2  13  242.38    9.80
  -3  -2  13  217.18    5.80
   3  -2  13  227.98    9.60
   3  -2  13  211.88    6.50
  -3   2  13  216.28    6.10
  -3  -3  13  170.98    4.80
   3   3  13  166.08    5.30
  -3   3  13  169.08    5.30
   3   4  13   32.50    2.90
  -3  -4  13   28.90    2.10
  -3   4  13   33.70    3.00
  -3  -5  13   16.30    1.80
   3   5  13   18.60    2.10
  -3  -5 -13   17.30    2.50
  -3   5  13   16.20    2.10
   3  -5  13   20.00    2.10
   3  -6 -13   -0.70    1.40
  -3  -6  13   -0.30    1.00
   3   6  13    1.50    1.80
  -3  -6 -13    0.10    1.20
   3  -6  13    1.30    1.10
  -3  -7  13    5.90    1.10
   3  -7 -13    6.90    1.40
  -3  -7 -13    5.40    1.30
  -3  -8  13    0.20    0.70
   3  -8 -13    0.80    1.10
  -3  -8 -13    1.70    0.90
  -3  -9  13    5.80    0.70
  -3  -9 -13    8.20    1.00
   4   0  13   -6.10    3.60
   4   0  13    1.90    1.60
  -4   0  13    0.90    1.30
   4   1  13  604.74   14.00
   4   1  13  595.04   15.40
  -4  -1  13  598.24   13.80
  -4  -1  13  580.64   16.50
  -4   1  13  597.44   13.80
   4  -1  13  609.84   14.00
   4  -1  13  598.94   16.50
  -4  -2  13    5.10    1.20
  -4  -2  13    0.60    1.50
  -4  -2  13   12.20    4.70
   4  -2  13    3.50    2.00
   4  -2  13   -5.50    4.90
  -4  -3  13    2.50    1.00
   4   3  13    2.50    1.40
  -4  -3  13   -0.50    2.10
  -4   3  13    4.10    1.50
   4   4  13  118.79    4.40
  -4  -4  13  121.39    3.70
  -4   4  13  114.59    4.30
   4   5  13    5.60    1.60
  -4  -5  13    0.50    1.00
  -4   5  13    2.00    1.70
  -4  -5 -13    3.50    1.50
   4   6  13   27.70    2.80
  -4  -6  13   20.80    1.90
   4  -6 -13   23.00    2.70
  -4  -6 -13   24.00    2.30
  -4  -7  13    0.40    1.00
   4  -7 -13    0.20    1.40
  -4  -7 -13    0.80    1.10
  -4  -8  13   -1.00    0.70
  -4  -8 -13    1.30    0.90
  -4  -9  13   34.20    1.30
  -4  -9 -13   35.80    1.50
  -5   0  13   -2.40    1.20
   5   0  13    1.30    1.40
  -5  -1  13    9.90    1.50
   5   1  13    9.10    1.50
   5  -1  13   14.40    1.90
  -5   1  13   11.30    1.50
  -5  -2  13  160.68    4.90
   5   2  13  167.38    5.20
  -5  -2  13  169.58    4.70
   5  -2  13  162.68    5.50
  -5   2  13  169.28    5.00
  -5  -3  13   34.60    3.50
   5   3  13   30.00    2.70
  -5  -3  13   39.30    2.20
  -5   3  13   39.80    2.70
  -5  -4  13   83.59    3.00
   5   4  13   80.79    3.60
  -5   4  13   83.89    3.60
  -5  -5  13    1.50    0.90
   5   5  13    2.40    1.50
  -5   5  13    5.10    1.70
  -5  -5 -13    2.30    1.30
   5  -6 -13   15.10    2.00
  -5  -6  13   13.00    1.70
   5   6  13   14.90    1.90
  -5  -6 -13   18.90    2.10
   5   7  13   14.80    2.00
  -5  -7  13   14.40    1.60
  -5  -7 -13   16.80    1.80
  -5  -8  13   18.60    1.20
  -5  -8 -13   22.70    1.60
  -5  -9  13   -0.30    0.40
  -5  -9 -13    1.20    0.60
   6   0  13    2.60    1.50
  -6   0  13    1.00    1.20
  -6  -1  13  283.47    7.20
   6   1  13  275.97    7.40
   6  -1  13  273.77    7.40
  -6   1  13  282.17    7.20
   6   2  13  131.69    4.50
  -6  -2  13  135.99    4.00
  -6  -2  13  129.29    4.20
   6  -2  13  127.99    4.70
  -6   2  13  128.29    4.20
  -6  -3  13   76.79    3.60
  -6  -3  13   70.09    3.30
  -6   3  13   71.99    3.20
  -6  -4  13   50.79    2.30
   6   4  13   44.70    2.90
  -6   4  13   43.60    2.80
  -6  -4 -13   51.29    3.10
  -6  -5  13   -0.20    0.90
   6  -5 -13    2.10    2.00
   6   5  13    1.40    1.40
  -6   5  13    3.10    1.50
  -6  -5 -13    2.10    1.30
   6   6  13   42.90    2.70
  -6  -6  13   37.70    2.10
  -6  -6 -13   41.90    2.50
  -6   6  13   39.50    3.10
  -6  -7  13   34.20    2.00
   6   7  13   37.70    2.60
  -6  -7 -13   33.80    2.70
  -6  -8 -13    0.50    0.70
  -6  -9  13    5.50    0.60
  -6  -9 -13    7.60    0.90
   7   0  13    0.50    1.40
  -7   0  13    1.00    1.20
   7   1  13  130.19    4.40
  -7  -1  13  129.29    4.10
  -7   1  13  124.59    4.10
   7  -1  13  134.19    4.40
  -7  -2  13    3.40    1.20
  -7  -2  13    1.30    1.20
  -7   2  13   -1.30    1.30
   7  -2  13    1.10    1.70
  -7  -3  13  134.69    4.00
   7   3  13  138.89    4.50
  -7  -3  13  131.29    4.50
  -7   3  13  131.69    4.30
   7   4  13    3.20    1.30
  -7  -4  13    3.60    1.00
  -7   4  13    2.00    1.20
  -7  -4 -13    5.40    1.50
   7   5  13    9.30    1.50
  -7  -5  13   10.50    1.50
  -7   5  13   11.90    1.60
  -7  -5 -13   11.00    1.60
   7   6  13    7.30    1.40
  -7  -6  13    5.10    1.00
  -7   6  13    6.90    1.70
  -7  -6 -13    5.20    1.30
  -7  -7  13    0.60    0.70
   7   7  13   -0.10    1.30
  -7  -7 -13    1.80    1.00
  -7  -8 -13    7.00    1.10
  -8   0  13   -0.20    1.00
   8   1  13   39.20    2.60
  -8  -1  13   40.10    2.30
   8  -1  13   35.30    3.60
  -8   1  13   34.50    2.30
   8   2  13   21.70    2.30
  -8  -2  13   27.70    2.20
  -8  -2  13   23.30    2.20
  -8   2  13   23.50    2.00
   8  -2  13   23.60    2.90
  -8  -3  13    1.40    1.00
  -8  -3  13   -0.30    1.50
   8   3  13    0.40    1.10
  -8  -3 -13    0.30    1.70
  -8   3  13   -0.20    1.00
  -8  -4  13    6.00    1.00
   8   4  13    4.20    1.30
  -8  -4 -13    3.60    1.40
  -8   4  13    4.40    1.20
  -8  -5  13   21.40    1.60
   8   5  13   21.80    2.10
  -8  -5 -13   23.60    2.20
  -8   5  13   21.40    2.20
   8   6  13   11.60    1.60
  -8  -6  13   10.30    1.40
  -8   6  13   12.60    1.70
  -8  -6 -13   10.40    1.40
   8   7  13   25.20    1.90
  -8  -7  13   18.20    1.30
  -8  -7 -13   22.90    1.60
  -8  -8 -13    0.60    0.70
  -9   0  13   -0.40    1.00
   9   0  13   -0.60    1.20
  -9  -1  13   11.40    1.30
   9   1  13    9.10    1.40
  -9   1  13    9.90    1.30
   9  -1  13   13.10    1.60
   9   2  13   47.50    2.70
  -9  -2  13   47.60    2.50
  -9  -2 -13   50.99    3.90
   9  -2  13   48.50    3.10
  -9   2  13   47.60    2.40
  -9  -3  13    2.90    1.00
  -9  -3  13    2.30    1.40
   9   3  13    2.30    1.20
  -9  -3 -13    1.60    1.70
  -9   3  13    0.90    1.00
  -9  -4  13  246.38    6.10
   9   4  13  238.58    6.40
  -9  -4 -13  229.78    6.60
  -9   4  13  244.48    6.30
  -9  -5  13   16.60    1.40
   9   5  13   16.80    1.90
  -9   5  13   16.90    1.90
  -9  -5 -13   12.40    1.60
   9   6  13   17.20    1.70
  -9  -6  13   16.40    1.40
  -9  -6 -13   16.90    1.80
  -9   6  13   19.70    2.10
  -9  -7  13   10.00    1.00
   9   7  13   15.80    1.60
  -9  -7 -13   13.20    1.30
  -9  -8  13   -0.10    0.40
  -9  -8 -13    0.20    0.60
 -10   0  13    0.40    1.00
  10   0  13    0.40    1.20
  10   1  13   62.79    2.90
 -10  -1  13   66.39    2.70
 -10   1  13   66.79    2.70
  10  -1  13   61.09    2.90
 -10  -2  13   56.39    2.50
  10   2  13   52.89    2.70
 -10   2  13   52.09    2.50
  10  -2  13   57.39    3.10
  10   3  13  263.37    6.80
 -10  -3  13  261.97    6.50
 -10  -3  13  257.77    6.40
 -10   3  13  255.67    6.60
 -10  -3 -13  242.98    7.10
 -10  -4  13   29.20    1.80
  10   4  13   27.20    2.10
 -10  -4 -13   28.90    2.60
 -10   4  13   28.70    2.00
  10   5  13   31.80    2.00
 -10  -5  13   29.20    1.70
 -10   5  13   26.70    3.20
 -10  -5 -13   27.70    3.00
 -10  -6  13    0.50    0.60
  10   6  13    0.80    0.90
 -10  -6 -13   -0.30    0.90
 -10   6  13   -1.20    1.00
  10   7  13   10.30    1.40
 -10  -7  13    6.60    0.90
  11   0  13   -0.70    1.10
 -11   0  13   -0.40    0.90
 -11  -1  13   12.30    1.30
  11   1  13   12.50    1.50
 -11   1  13   12.70    1.60
  11  -1  13   12.50    1.50
 -11  -2  13   34.10    2.00
  11   2  13   36.70    2.30
 -11   2  13   34.20    2.00
 -11  -3  13   84.89    3.30
  11   3  13   81.79    3.10
 -11   3  13   77.09    2.90
 -11  -4  13    4.00    1.00
  11   4  13    4.10    1.00
 -11  -4 -13    3.50    1.70
 -11   4  13    4.20    1.00
  11   5  13    0.90    0.90
 -11  -5  13    0.40    0.80
 -11  -5 -13   -0.10    1.20
 -11   5  13   -0.20    0.90
 -11  -6  13    1.10    0.70
  11   6  13    3.50    0.90
 -11   6  13    2.10    1.00
 -11  -6 -13    2.00    0.90
  11   7  13    7.90    1.20
 -11   7 -13    5.70    1.00
 -11  -7  13    5.80    0.80
 -11  -7 -13    7.60    1.10
  12   0  13    0.70    1.10
 -12   0  13    0.00    0.80
  12   1  13    6.60    1.20
 -12  -1  13    5.40    1.00
  12  -1  13    4.90    1.30
 -12   1  13    5.50    1.00
 -12  -2  13   92.59    3.00
  12   2  13   94.29    3.30
 -12   2  13   91.89    3.10
 -12  -2 -13   94.79    3.10
  12   3  13    8.80    1.20
 -12   3  13   11.30    1.40
  12   4  13   16.90    1.60
 -12   4  13   14.30    1.50
  12   5  13    0.80    0.70
 -12   5  13   -0.10    0.80
  12   6  13    2.40    0.70
 -12   6  13    1.50    0.90
 -13   0  13    0.60    0.80
  13   0  13    1.30    1.00
 -13  -1  13    9.20    1.10
  13   1  13    9.00    1.10
 -13  -1 -13    9.40    1.10
 -13   1  13    8.90    1.10
  13   2  13    3.60    1.00
 -13  -2  13    1.60    0.90
 -13  -2 -13    5.20    1.10
 -13   2  13    4.00    0.90
  13   3  13   24.30    1.70
 -13   3  13   25.40    1.60
  13   4  13    4.10    0.90
 -13   4  13    4.90    0.90
  13   5  13    2.50    0.70
 -13   5  13    1.80    0.70
 -13   6 -13    3.40    0.70
  13   6  13    2.00    0.70
 -13   6  13    2.20    0.80
 -14   0  13    0.20    0.70
 -14   0 -13    1.80    0.80
  14   0  13    0.20    0.90
 -14  -1  13   -0.30    0.70
  14   1  13   -0.10    0.80
 -14  -1 -13   -0.50    0.70
 -14   1  13    0.30    0.70
 -14  -2  13    8.50    1.00
  14   2  13    9.40    1.30
 -14   2  13    9.20    1.20
 -14  -2 -13    9.00    1.10
  14   3  13    2.70    0.80
 -14   3  13    3.50    0.70
  14   4  13    6.80    0.90
 -14   4 -13    6.70    0.80
 -14   4  13    7.30    0.80
 -14   5 -13    1.50    0.60
  14   5  13    3.00    0.60
 -14   5  13    2.10    0.70
 -15   0 -13    0.00    0.60
 -15   0  13    0.10    0.60
  15   0  13    0.10    0.90
 -15   1 -13    0.60    0.60
 -15  -1  13    0.60    0.70
  15   1  13    0.70    0.70
 -15   1  13    0.50    0.60
 -15  -1 -13   -0.50    0.70
 -15  -2  13   -1.30    1.00
 -15   2 -13    1.00    0.60
  15   2  13    0.30    0.70
 -15   2  13    1.30    0.60
  15   3  13   12.00    1.10
 -15   3 -13   11.00    1.00
 -15   3  13   14.00    1.10
 -15   4 -13   13.50    0.90
  15   4  13   11.60    1.00
 -15   4  13   13.00    1.00
 -16   0 -13   -0.40    0.60
 -16   0  13   -0.30    0.60
 -16   1 -13   -0.40    0.50
 -16  -1  13   -0.30    0.70
 -16   1  13    0.30    0.60
 -16  -1 -13   -1.60    1.10
  16   2  13    4.00    0.70
 -16   2 -13    3.70    0.60
 -16   2  13    2.90    0.60
  16   3  13    9.30    0.90
 -16   3 -13   10.20    0.80
 -16   3  13    8.60    0.90
 -17   0  13    0.20    0.60
 -17   1 -13    1.00    0.80
 -17   1  13    1.00    0.50
   0   0  14   92.09    6.40
   0   0  14   86.69    3.60
   0   1  14   -1.10    1.40
   0  -1  14    0.10    1.50
   0  -1  14    5.70    4.00
   0  -2  14    5.90    4.30
   0   2  14    5.70    1.50
   0  -2  14    7.90    1.80
   0  -3  14    0.00    1.10
   0   3  14    0.10    1.30
   0   4  14   42.60    3.10
   0  -4  14   41.20    2.20
   0  -5  14   -1.90    0.90
   0   5  14   -1.40    1.60
   0  -6  14   12.30    1.50
   0   6  14   16.50    2.20
   0  -6 -14   16.00    2.10
   0  -7  14   -1.30    0.70
   0  -7 -14    0.40    1.00
   0  -8 -14   51.99    2.30
   0  -8  14   51.69    1.80
   0  -9 -14    0.50    0.70
   1   0  14  130.79    4.40
  -1   0  14  135.39    4.40
   1   1  14    3.30    1.50
  -1  -1  14    7.00    4.20
  -1  -1  14    5.30    1.50
  -1   1  14    3.40    1.30
   1  -1  14    3.10    1.50
  -1  -2  14   50.79    3.20
   1   2  14   52.59    3.00
  -1  -2  14   38.90    4.70
   1  -2  14   54.09    3.30
  -1   2  14   53.99    2.90
   1  -2  14   40.80    5.40
   1   3  14   24.00    2.60
  -1  -3  14   21.90    1.80
  -1   3  14   18.50    2.50
  -1  -4  14   50.39    2.30
   1   4  14   47.90    3.20
  -1   4  14   45.90    3.00
   1   5  14    1.80    1.60
  -1  -5  14    2.20    1.00
   1  -5  14    2.30    1.00
  -1   5  14    3.50    1.70
   1   6  14    9.40    2.00
  -1  -6  14    9.40    1.20
   1  -6 -14    9.00    1.50
  -1   6  14    9.70    2.00
  -1  -6 -14   13.50    2.20
   1  -6  14    9.80    1.20
   1  -7 -14    1.50    1.10
  -1  -7 -14    0.80    1.00
  -1  -8  14    1.40    0.60
   1  -8 -14    0.80    0.90
  -1  -8 -14    1.70    0.90
   1  -9 -14   15.20    1.40
  -1  -9 -14   16.20    1.10
  -2   0  14  145.19    4.60
   2   0  14  149.09    4.70
   2   1  14    1.10    1.30
  -2  -1  14    2.20    1.40
   2  -1  14    0.10    1.50
  -2   1  14    3.20    1.40
   2  -1  14   -0.40    4.40
  -2  -2  14   30.90    2.90
  -2  -2  14   30.90    2.10
   2   2  14   31.90    2.60
   2  -2  14   30.90    3.10
   2  -2  14   15.70    6.30
  -2   2  14   31.80    2.60
   2   3  14   82.19    3.60
  -2  -3  14   81.69    2.90
  -2   3  14   73.69    3.40
  -2  -4  14   25.70    1.90
   2  -4  14   25.20    3.10
  -2  -5  14   -0.40    0.90
   2   5  14    0.90    1.50
   2  -5  14    0.10    1.00
  -2   5  14    0.50    1.60
   2  -6 -14    5.80    1.40
  -2  -6  14    2.00    0.90
   2   6  14    7.80    1.80
   2  -6  14    3.30    1.00
  -2  -6 -14    4.80    1.40
  -2   6  14    7.40    1.90
   2  -7 -14    8.10    1.30
  -2  -7  14    4.70    0.90
  -2  -7 -14    5.00    1.20
   2  -8 -14    6.80    1.10
  -2  -8 -14    5.80    1.00
  -2  -9  14    0.90    0.50
   2  -9 -14    0.40    0.80
  -2  -9 -14    1.30    0.60
  -3   0  14  292.77    7.40
   3   0  14  279.97    7.50
   3   1  14    9.10    1.50
  -3  -1  14   11.30    1.60
  -3   1  14    9.60    1.40
   3  -1  14   14.20    1.90
  -3  -2  14    5.70    1.20
  -3  -2  14    8.50    1.70
   3   2  14    2.60    1.40
   3  -2  14    3.30    1.90
  -3   2  14    4.00    1.40
  -3  -3  14    3.80    1.00
  -3  -3  14    6.80    3.10
   3   3  14    3.90    1.50
  -3   3  14    5.00    1.50
   3   4  14    2.30    1.50
  -3  -4  14    0.20    0.90
  -3   4  14    0.30    1.40
   3   5  14   17.20    1.90
  -3  -5  14   12.40    1.50
  -3  -5 -14   12.90    1.80
  -3   5  14   19.20    2.60
   3  -6 -14    0.40    1.30
   3   6  14   -1.50    1.50
  -3  -6 -14   -0.20    1.10
  -3   6  14    2.60    1.80
   3  -7 -14    4.10    2.20
  -3  -7 -14    2.70    1.10
   3  -8 -14    0.70    1.00
  -3  -8 -14   -0.30    0.80
  -3  -9  14   -0.80    0.40
  -3  -9 -14   -0.80    0.50
  -4   0  14  628.24   14.60
   4   0  14  645.54   14.80
  -4  -1  14   27.10    2.30
   4   1  14   23.30    2.60
   4  -1  14   20.60    2.70
  -4   1  14   27.40    2.30
   4   2  14  159.78    5.10
  -4  -2  14  161.28    4.80
  -4  -2  14  161.98    4.60
  -4   2  14  155.48    4.80
   4  -2  14  154.68    5.20
  -4  -3  14   37.40    3.50
   4   3  14   39.30    2.80
  -4   3  14   47.40    2.80
  -4  -4  14    0.20    0.90
   4   4  14   -0.90    1.40
  -4   4  14    1.70    1.40
  -4  -5  14  249.97    6.30
   4   5  14  247.38    6.70
  -4   5  14  240.78    6.60
  -4  -5 -14  239.78    7.00
   4   6  14   35.30    2.70
  -4  -6  14   31.90    1.90
   4  -6 -14   35.70    2.70
  -4  -6 -14   38.20    2.50
  -4   6  14   33.40    2.90
   4  -7 -14   -2.60    1.20
   4   7  14    2.40    1.60
  -4  -7 -14    0.20    0.90
  -4  -8  14    0.10    0.60
  -4  -8 -14    1.00    0.80
  -4  -9  14    0.30    0.40
  -4  -9 -14    0.40    0.60
  -5   0  14  108.59    3.80
   5   0  14  109.09    4.00
  -5  -1  14   49.20    2.60
   5   1  14   48.40    3.00
   5  -1  14   51.19    3.10
  -5   1  14   52.79    2.70
  -5  -2  14   94.09    3.60
  -5  -2  14   99.79    3.40
   5   2  14   98.29    3.80
   5  -2  14   96.39    4.10
  -5   2  14   96.89    3.60
  -5  -3  14   21.20    2.20
   5   3  14   18.20    2.40
  -5  -3  14   19.10    1.70
  -5   3  14   16.30    2.20
   5   4  14   18.40    2.40
  -5  -4  14   16.30    1.70
  -5   4  14   16.70    1.80
  -5  -5  14   35.00    1.90
   5   5  14   30.70    2.50
  -5  -5 -14   36.20    2.60
  -5   5  14   36.00    2.70
   5   6  14    2.10    1.40
   5  -6 -14    3.60    1.60
  -5  -6  14    0.60    0.80
  -5  -6 -14    2.70    1.20
  -5   6  14    3.20    1.60
  -5  -7  14    3.40    0.90
   5   7  14    6.70    1.50
  -5  -7 -14    5.60    1.20
  -5  -8  14    0.10    0.60
  -5  -8 -14    2.10    0.80
  -5  -9  14    8.80    0.70
  -5  -9 -14   11.60    0.90
   6   0  14  492.45   11.70
  -6   0  14  488.25   11.50
  -6  -1  14    7.60    1.30
   6   1  14    8.60    1.60
  -6   1  14   10.90    1.50
   6  -1  14    9.90    1.60
   6   2  14    4.90    1.50
  -6  -2  14    3.20    1.30
  -6  -2  14    5.60    1.40
  -6   2  14    3.80    1.40
   6  -2  14    3.60    1.80
  -6  -3  14    2.90    1.00
   6   3  14   -0.10    1.30
  -6   3  14    2.90    1.20
   6   4  14   -0.70    1.30
  -6  -4  14    1.50    0.90
  -6   4  14    0.80    1.20
  -6  -4 -14   -0.10    1.30
   6  -5 -14   18.30    2.90
   6   5  14   18.50    2.20
  -6  -5  14   18.00    1.60
  -6   5  14   20.70    2.30
  -6  -5 -14   17.70    2.30
   6   6  14    7.80    1.40
  -6  -6  14    7.40    1.00
  -6   6  14    9.10    1.70
  -6  -6 -14    8.80    1.40
   6   7  14    6.80    1.40
  -6  -7  14    2.10    0.80
  -6  -7 -14    4.00    1.00
  -6  -8  14    2.90    0.60
  -6  -8 -14    4.50    0.90
  -7   0  14  242.48    6.30
   7   0  14  231.08    6.60
  -7  -1  14    3.30    1.20
   7   1  14    3.50    1.30
  -7   1  14    3.40    1.10
   7  -1  14    4.30    2.20
   7   2  14    7.40    1.50
  -7  -2  14    6.60    1.30
   7  -2  14    8.70    2.60
  -7   2  14    6.50    1.30
   7   3  14   73.89    3.20
  -7  -3  14   72.99    2.70
  -7  -3  14   72.89    3.40
  -7   3  14   72.59    3.00
  -7  -4  14    1.60    0.90
   7   4  14    2.80    1.20
  -7   4  14    2.60    1.20
  -7  -4 -14    1.20    1.40
  -7  -5  14    1.50    0.80
   7   5  14    0.20    1.10
  -7  -5 -14    1.40    1.10
  -7   5  14    1.30    1.20
  -7  -6  14    8.80    1.30
  -7  -6 -14   11.00    1.40
  -7   6  14   10.50    1.60
  -7  -7  14    8.20    0.90
   7   7  14   11.10    1.30
  -7  -7 -14    8.80    1.40
  -7  -8 -14    2.70    0.70
  -8   0  14   -0.10    1.00
   8   0  14   -0.20    1.20
  -8  -1  14   14.50    1.90
   8   1  14   16.10    2.10
  -8   1  14   11.70    1.40
   8  -1  14   13.90    1.70
  -8  -2  14   39.50    2.40
   8   2  14   37.70    2.50
   8  -2  14   39.20    3.00
  -8   2  14   35.00    2.20
  -8  -3  14   10.40    1.60
   8   3  14    7.50    1.40
  -8  -3  14    9.60    1.60
  -8   3  14    6.80    1.20
  -8  -3 -14    8.00    1.80
   8   4  14   10.10    1.50
  -8  -4  14   10.20    1.40
  -8  -4 -14   10.10    1.60
  -8   4  14    9.60    1.40
  -8  -5  14   48.40    2.10
   8   5  14   54.19    2.50
  -8   5  14   55.29    2.50
  -8  -5 -14   53.39    2.70
   8   6  14   25.90    2.00
  -8  -6  14   24.00    1.40
  -8   6  14   24.00    2.20
  -8  -6 -14   24.30    1.90
  -8  -7  14    1.60    0.60
   8   7  14    3.10    1.10
  -8  -7 -14    2.30    0.80
  -8  -8  14    8.90    0.70
  -8  -8 -14   12.10    1.00
   9   0  14    2.30    1.20
  -9   0  14    3.00    1.10
   9   1  14   16.90    2.00
  -9  -1  14   14.70    1.80
   9  -1  14   19.70    2.30
  -9   1  14   14.30    1.80
   9   2  14  117.29    3.90
  -9  -2  14  120.79    3.80
  -9  -2 -14  116.49    4.70
   9  -2  14  119.09    4.20
  -9   2  14  120.49    3.80
  -9  -3  14   27.10    1.90
   9   3  14   28.00    2.20
  -9  -3  14   30.10    2.50
  -9   3  14   29.50    2.00
  -9  -3 -14   30.10    2.90
   9   4  14    0.60    1.00
  -9  -4  14    1.20    0.90
  -9  -4 -14    1.50    1.30
  -9   4  14    0.40    1.00
  -9  -5  14   23.70    1.50
   9   5  14   24.80    1.90
  -9  -5 -14   24.40    2.10
  -9   5  14   24.40    2.00
  -9  -6  14    9.70    1.00
   9   6  14   14.30    1.50
  -9  -6 -14   13.30    1.60
  -9   6  14   12.60    1.30
  -9  -7  14   -0.70    0.50
   9   7  14    0.20    0.90
  -9  -7 -14    0.30    0.70
  10   0  14   78.89    3.10
 -10   0  14   83.09    3.00
 -10  -1  14   15.00    1.70
  10   1  14   14.70    2.00
 -10   1  14   15.40    1.70
  10  -1  14   14.00    1.60
  10   2  14    2.60    1.10
 -10  -2  14    3.10    1.10
 -10   2  14    5.00    1.10
  10   3  14   15.60    1.90
 -10  -3  14   15.80    1.70
 -10   3  14   16.30    1.70
 -10  -3 -14   20.20    2.90
 -10  -4  14    6.50    1.10
  10   4  14    6.70    1.20
 -10  -4 -14    5.90    1.60
 -10   4  14    7.40    1.20
  10   5  14    1.40    0.90
 -10  -5  14    2.10    0.80
 -10  -5 -14    1.70    1.10
 -10   5  14    1.70    0.90
  10   6  14   17.40    1.50
 -10  -6  14   15.20    1.10
 -10   6  14   16.60    1.70
 -10  -6 -14   16.70    1.50
  10   7  14   11.50    1.40
 -10  -7  14   10.40    0.90
 -10  -7 -14   11.50    1.10
  11   0  14   11.50    1.40
 -11   0  14   14.60    1.60
 -11  -1  14    1.50    0.90
  11   1  14    2.70    1.10
 -11   1  14    1.40    0.90
  11  -1  14    0.10    1.20
 -11  -2  14    0.40    1.00
  11   2  14    1.90    1.00
 -11   2  14    1.00    0.90
  11   3  14   99.49    3.40
 -11   3  14  103.19    3.30
  11   4  14   25.30    2.00
 -11   4  14   25.60    1.80
 -11  -4 -14   20.00    2.90
  11   5  14    3.10    0.90
 -11   5  14    2.90    0.90
 -11  -5 -14    5.30    1.30
  11   6  14    9.20    1.20
 -11  -6 -14   11.90    1.40
 -11   6  14   12.30    1.50
  11   7  14    0.20    0.70
 -11  -7 -14   -0.40    0.70
 -12   0  14    0.60    0.80
  12   0  14    0.10    1.00
 -12  -1  14   13.90    1.50
  12   1  14   13.90    1.70
  12  -1  14   14.60    1.50
 -12   1  14   15.40    1.60
  12   2  14    0.20    0.90
 -12  -2  14    1.10    0.90
 -12   2  14    0.30    0.80
  12   3  14   -0.30    0.90
  12   4  14    0.70    0.80
 -12   4  14   -0.40    0.70
  12   5  14   21.00    1.40
 -12   5  14   19.10    1.40
 -12   6 -14    0.20    0.60
  12   6  14    1.10    0.70
 -12   6  14    0.30    0.80
 -13   0  14    4.20    0.90
  13   0  14    2.60    1.00
  13   1  14   10.40    1.20
 -13  -1  14   11.00    1.30
  13  -1  14   10.40    1.30
 -13  -1 -14   11.30    1.40
 -13   1  14    9.80    1.30
 -13  -2  14   20.50    1.50
  13   2  14   20.50    1.60
 -13   2  14   20.60    1.50
 -13  -2 -14   19.60    1.70
  13   3  14    6.50    0.90
 -13   3  14    5.50    0.90
  13   4  14    1.30    0.70
 -13   4  14   -0.30    0.60
  13   5  14   -0.40    0.60
 -13   5  14   -0.20    0.70
  14   0  14    2.60    0.90
 -14   0  14    2.00    0.70
 -14   0 -14    1.40    0.70
 -14   1 -14    4.10    0.70
 -14  -1  14    2.40    0.70
  14   1  14    1.70    0.80
 -14   1  14    2.80    0.70
 -14  -1 -14    3.40    0.80
  14   2  14   -0.10    0.70
 -14  -2  14    1.10    0.90
 -14   2  14    1.60    0.70
  14   3  14    1.30    0.70
 -14   3  14    1.80    0.70
 -14   4 -14    0.10    0.50
  14   4  14    0.20    0.60
 -14   4  14    1.10    0.60
  14   5  14    9.30    0.90
 -14   5 -14    9.30    1.20
 -14   5  14    8.70    1.00
 -15   0 -14   21.10    1.20
  15   0  14   25.50    1.50
 -15   0  14   22.60    1.20
 -15  -1  14    2.90    0.70
  15   1  14    3.00    0.80
 -15   1 -14    3.80    0.70
 -15  -1 -14    2.00    0.80
 -15   1  14    2.50    0.70
  15   2  14    6.30    0.80
 -15   2 -14    6.90    0.90
 -15   2  14    6.30    0.80
 -15   3 -14    0.10    0.50
  15   3  14    0.00    0.60
 -15   3  14    0.50    0.60
  15   4  14    7.30    0.90
 -15   4 -14    6.00    0.80
 -15   4  14    8.30    0.90
 -16   0 -14    3.60    0.60
 -16   0  14    4.70    0.60
 -16   1 -14    6.70    0.80
  16   1  14    7.20    0.80
 -16  -1  14    5.90    0.80
 -16   1  14    5.60    0.70
 -16   2 -14    1.40    0.50
  16   2  14    3.70    1.00
 -16   2  14    2.00    0.50
   0   0  15    0.40    1.40
   0   1  15    1.50    1.30
   0  -1  15    0.70    1.40
   0   2  15   93.09    3.60
   0  -2  15   88.19    3.80
   0   3  15   -0.40    1.30
   0  -4  15   -0.60    1.00
   0   4  15   -0.30    1.30
   0   5  15   -2.10    1.40
   0  -5  15   -1.30    0.80
   0  -6  15   45.60    2.00
   0   6  15   42.20    3.00
   0  -6 -15   46.60    2.70
   0  -8 -15    8.30    1.00
   0  -9 -15   -0.30    0.60
  -1   0  15    0.30    1.20
   1   0  15   -0.70    1.20
  -1  -1  15   37.20    2.70
   1   1  15   39.00    2.60
  -1   1  15   32.10    2.50
   1  -1  15   39.10    2.70
   1   2  15   20.10    2.40
  -1  -2  15   20.60    2.70
   1  -2  15   20.70    2.00
  -1   2  15   19.10    2.30
  -1  -3  15   -1.30    1.00
   1   3  15    0.60    1.70
  -1   3  15    0.00    1.30
  -1  -4  15    8.00    1.20
   1   4  15    7.30    1.60
  -1   4  15    8.10    1.50
   1   5  15   -0.80    1.40
  -1  -5  15   -0.70    0.80
   1  -5  15    0.30    0.90
  -1   5  15    2.40    1.50
   1   6  15   14.90    1.90
  -1  -6  15    9.50    1.30
   1  -6 -15   14.70    2.00
   1  -6  15   10.70    1.40
  -1  -6 -15   14.50    2.00
  -1   6  15   12.30    1.90
   1  -7 -15    5.90    1.20
  -1  -7  15    4.10    0.80
  -1  -8  15    4.30    0.70
   1  -8 -15    7.10    1.00
  -1  -8 -15    6.80    1.00
   1  -9 -15    0.30    0.60
  -1  -9 -15    1.70    1.00
  -2   0  15   -0.10    1.20
   2   0  15    0.60    1.30
  -2  -1  15   46.50    2.80
   2   1  15   43.50    2.70
   2  -1  15   46.10    2.80
  -2   1  15   45.20    2.60
  -2  -2  15   75.19    3.40
   2   2  15   71.79    3.30
  -2   2  15   69.09    3.10
   2  -2  15   77.29    3.60
   2   3  15   -1.90    1.30
  -2  -3  15    0.90    1.00
   2   4  15   17.50    1.90
  -2  -4  15   16.60    1.60
  -2   4  15   15.80    2.20
   2   5  15    3.20    1.40
  -2   5  15    4.00    1.50
  -2  -6  15    2.40    0.90
   2  -6 -15    5.30    1.30
   2   6  15    8.00    1.60
  -2   6  15    5.00    1.70
  -2  -6 -15    5.00    1.40
  -2  -7  15   13.40    1.20
   2  -7 -15   14.10    1.80
  -2  -7 -15   16.40    2.30
   2  -8 -15   20.70    1.50
  -2  -8  15   20.30    1.10
  -2  -8 -15   23.20    1.60
  -2  -9 -15   18.60    1.10
   3   0  15    0.90    1.30
  -3   0  15    0.00    1.20
   3   1  15    3.90    1.40
  -3  -1  15    1.60    1.20
  -3   1  15    1.90    1.30
   3  -1  15    1.30    1.50
   3   2  15   97.99    3.70
  -3  -2  15   97.89    3.70
  -3   2  15   94.29    3.60
   3  -2  15   98.59    4.00
   3   3  15    5.90    1.40
  -3  -3  15    8.80    1.20
  -3  -3  15    7.20    2.70
  -3   3  15    7.20    1.40
   3   4  15   28.50    2.50
  -3  -4  15   26.50    1.70
  -3   4  15   24.80    2.40
   3   5  15    7.70    1.50
  -3  -5  15    8.50    1.10
  -3   5  15    7.60    1.50
   3  -6 -15    3.20    1.30
   3   6  15    3.20    1.40
  -3  -6 -15    2.20    1.10
  -3   6  15    5.50    1.60
   3   7  15    1.90    1.60
   3  -7 -15    1.60    1.10
  -3  -7 -15   -0.30    0.90
   3  -8 -15    0.20    0.90
  -3  -8  15   -0.40    0.50
  -3  -8 -15    0.40    0.70
  -4   0  15    1.80    1.30
   4   0  15    1.30    1.30
   4   1  15   23.30    2.50
  -4  -1  15   23.10    2.30
   4  -1  15   22.80    2.60
  -4   1  15   22.90    2.20
   4   2  15    2.00    2.10
  -4  -2  15    1.20    1.40
   4  -2  15    0.50    1.70
  -4  -3  15   34.90    3.30
   4   3  15   30.70    2.60
  -4  -3  15   32.90    2.00
  -4   3  15   32.10    2.40
   4   4  15   -0.20    1.20
  -4  -4  15    0.90    0.90
  -4   4  15   -0.30    1.20
  -4  -5  15    5.90    1.00
   4   5  15    9.70    1.50
  -4  -5 -15    7.10    1.50
  -4   5  15    5.70    1.40
   4  -6 -15    5.90    1.40
   4   6  15    7.50    1.40
  -4  -6 -15    7.90    1.40
  -4   6  15    6.10    1.60
  -4  -7  15    0.70    0.70
   4  -7 -15    3.60    1.20
   4   7  15    3.20    1.40
  -4  -7 -15    1.30    0.90
  -4  -8  15   -0.30    0.50
  -4  -8 -15    0.90    0.70
  -5   0  15   -1.80    1.10
   5   0  15    0.20    1.20
   5   1  15    0.10    1.50
  -5  -1  15    0.00    1.20
   5  -1  15    1.10    1.40
  -5   1  15    1.30    1.80
   5   2  15    3.70    1.30
  -5  -2  15    5.60    1.60
  -5   2  15    3.90    1.30
   5  -2  15    4.70    1.80
  -5  -3  15    9.80    1.50
  -5  -3  15    9.90    1.90
   5   3  15   11.10    1.60
  -5   3  15    9.30    1.40
  -5  -4  15   41.30    2.00
   5   4  15   39.10    2.60
  -5   4  15   42.70    2.50
  -5  -5  15    6.70    1.00
   5   5  15    9.10    1.40
  -5  -5 -15    7.90    1.50
  -5   5  15    8.70    1.40
   5   6  15   -2.30    1.20
  -5  -6  15   -0.60    0.70
  -5  -6 -15    1.10    1.00
  -5  -7  15    9.60    1.00
   5   7  15   16.70    2.10
  -5  -7 -15   14.20    1.50
  -5  -8  15    0.20    0.50
  -5  -8 -15    1.60    0.70
   6   0  15    0.30    1.20
  -6   0  15    0.80    1.10
   6   1  15   17.70    2.30
  -6  -1  15   21.10    2.00
  -6   1  15   18.50    2.00
   6  -1  15   19.90    2.50
  -6  -2  15  252.77    6.50
   6   2  15  250.17    6.80
   6  -2  15  245.18    6.70
  -6   2  15  247.48    6.60
   6   3  15    7.40    1.50
  -6  -3  15    8.00    1.20
  -6  -3  15    9.50    1.80
  -6   3  15    6.70    1.30
  -6  -4  15   25.00    1.60
   6   4  15   24.90    2.30
  -6   4  15   24.80    2.20
  -6  -4 -15   22.30    2.40
   6   5  15    4.30    1.30
   6  -5 -15    5.10    1.60
  -6  -5  15    2.70    0.90
  -6  -5 -15    2.70    1.20
  -6   5  15    3.00    1.20
   6   6  15    3.00    1.20
  -6  -6  15    2.80    0.80
  -6  -6 -15    4.80    1.20
  -6   6  15    3.70    1.30
   6   7  15    0.30    1.10
  -6  -7 -15    0.60    0.80
  -6  -8  15    0.20    0.40
  -6  -8 -15    2.50    0.70
   7   0  15    0.60    1.30
  -7   0  15   -1.50    1.00
  -7  -1  15   52.99    2.60
   7   1  15   54.99    2.90
   7  -1  15   59.09    2.90
  -7   1  15   54.59    2.60
  -7  -2  15   65.59    2.90
   7   2  15   58.39    3.00
   7  -2  15   69.29    3.30
  -7   2  15   60.79    2.70
   7   3  15   13.60    1.60
  -7  -3  15   16.80    1.80
  -7  -3  15   21.40    1.70
  -7   3  15   16.10    1.90
  -7  -4  15    0.00    0.80
   7   4  15    1.30    1.20
  -7  -4 -15   -2.20    1.20
  -7   4  15    0.60    1.00
   7   5  15    2.60    1.10
  -7  -5  15    2.70    0.80
  -7  -5 -15    1.90    1.20
  -7   5  15    2.80    1.20
   7   6  15    3.30    1.10
  -7  -6 -15    4.50    1.10
  -7   6  15    4.30    1.20
   7   7  15    0.50    1.00
  -7  -7 -15    0.60    0.80
  -7  -8  15   -0.70    0.40
  -7  -8 -15    0.10    0.60
   8   0  15   -1.00    1.10
  -8   0  15   -0.40    0.90
  -8  -1  15   56.09    2.60
   8   1  15   58.69    2.80
   8  -1  15   61.99    2.90
  -8   1  15   61.39    2.70
   8   2  15   73.19    3.10
  -8  -2  15   64.49    2.80
   8  -2  15   67.89    3.30
  -8   2  15   65.99    2.80
   8   3  15   16.00    2.00
  -8  -3  15   18.30    2.50
  -8  -3 -15   16.10    2.40
  -8   3  15   17.40    1.90
  -8  -4  15    1.10    0.90
   8   4  15    0.70    1.00
  -8   4  15   -0.80    0.90
  -8  -4 -15    1.40    1.20
   8   5  15    0.90    1.00
  -8  -5  15   -0.10    0.70
  -8  -5 -15    2.00    1.00
  -8   5  15    0.90    1.20
   8   6  15    6.10    1.10
  -8  -6  15    5.10    0.80
  -8   6  15    4.80    1.10
  -8  -6 -15    6.10    1.10
   8   7  15    0.60    0.90
  -8  -7 -15    1.30    0.70
   9   0  15    0.20    1.20
  -9   0  15   -0.60    0.90
   9   1  15   31.50    2.20
  -9  -1  15   30.80    2.00
  -9   1  15   30.60    2.00
   9  -1  15   33.80    2.40
   9   2  15   10.70    1.40
  -9  -2  15   10.60    1.30
  -9  -2 -15   14.90    2.10
   9  -2  15   12.10    1.80
  -9   2  15   12.50    1.70
   9   3  15   26.90    2.10
  -9   3  15   30.20    2.00
  -9  -3 -15   26.60    2.60
   9   4  15   60.79    2.60
  -9   4  15   59.79    2.50
  -9  -4 -15   57.59    2.80
  -9  -5  15   -0.80    0.70
   9   5  15    1.20    1.00
  -9  -5 -15    1.10    1.10
  -9   5  15   -0.30    0.90
   9   6  15   -0.60    0.80
  -9  -6  15   -1.10    0.60
  -9   6  15   -0.30    1.00
  -9  -6 -15    1.00    0.80
   9   7  15   -0.40    0.90
  -9  -7 -15    0.60    0.70
 -10   0  15    2.00    0.90
  10   0  15   -0.50    1.10
  10   1  15   61.39    2.70
 -10  -1  15   62.19    2.50
 -10   1  15   65.09    2.60
  10  -1  15   63.89    2.70
  10   2  15   61.19    2.70
 -10  -2  15   60.19    2.50
 -10   2  15   59.09    2.50
  10   3  15    7.50    1.20
 -10   3  15    7.50    1.10
 -10  -3 -15    8.10    1.80
  10   4  15   15.90    1.70
 -10  -4 -15   13.80    2.10
  10   5  15    0.10    0.80
 -10  -5 -15   -0.90    1.00
 -10   5  15    0.00    0.90
  10   6  15   13.10    1.30
 -10   6  15   14.10    1.50
 -10  -6 -15   11.40    1.40
  10   7  15    8.50    0.90
 -10  -7 -15    6.70    1.00
 -11   0  15    0.20    0.80
  11   0  15    1.20    1.00
 -11  -1  15   30.90    1.80
  11   1  15   29.10    1.90
  11  -1  15   28.80    2.10
 -11   1  15   30.00    1.80
 -11  -2  15    6.60    1.10
  11   2  15    4.30    1.10
 -11   2  15    5.20    1.00
 -11  -2 -15    7.30    1.20
  11   3  15   -0.50    0.90
 -11   3  15    1.70    0.90
  11   4  15   12.40    1.50
 -11   4  15   14.50    1.40
  11   5  15   -0.60    0.70
 -11  -5 -15    0.20    1.20
 -11   5  15   -0.70    0.80
  11   6  15   25.10    1.30
 -11  -6 -15   21.30    1.50
  12   0  15    1.70    1.10
 -12   0  15    0.20    0.80
 -12  -1  15    6.00    1.30
  12   1  15    6.60    1.10
 -12   1  15    4.50    1.00
  12  -1  15    5.90    1.20
  12   2  15    7.10    1.60
 -12  -2  15    5.20    1.00
  12   3  15    1.20    0.80
 -12   3  15    0.90    0.80
  12   4  15    2.80    0.80
 -12   4  15    4.10    0.80
  12   5  15    2.80    0.70
 -12   5  15    2.60    0.70
 -12   6 -15    0.40    0.60
  12   6  15    1.00    0.80
 -12   6  15    0.80    0.80
  13   0  15   -1.30    0.90
 -13   0  15   -0.20    0.70
  13   1  15    5.10    0.90
 -13  -1  15    6.10    0.90
 -13   1  15    5.80    0.90
 -13  -1 -15    4.30    0.90
 -13  -2  15    0.50    0.90
  13   2  15    0.30    0.70
 -13   2  15   -0.10    0.70
  13   3  15    2.80    0.80
 -13   3  15    2.80    0.70
  13   4  15    5.70    0.80
 -13   4  15    5.90    0.80
  13   5  15    2.50    0.70
 -13   5 -15    1.90    0.60
 -13   5  15    2.30    0.70
  14   0  15    0.70    0.90
 -14   0 -15   -1.30    0.60
 -14   0  15    0.30    0.60
 -14  -1  15    5.50    0.80
 -14   1 -15    4.90    0.80
  14   1  15    4.40    0.80
 -14   1  15    4.50    0.70
 -14  -1 -15    4.10    0.80
 -14   2 -15   28.60    1.30
  14   2  15   27.70    1.40
 -14   2  15   27.10    1.40
 -14   3 -15   18.50    1.10
  14   3  15   14.80    1.20
 -14   3  15   19.30    1.10
  14   4  15    4.80    0.70
 -14   4 -15    3.30    0.60
 -14   4  15    5.00    0.70
 -15   0 -15    0.60    0.60
 -15   0  15   -0.20    0.60
 -15   1 -15    1.40    0.60
  15   1  15    1.50    0.70
 -15  -1  15    2.90    0.70
 -15   1  15    1.80    0.60
 -15  -1 -15    2.30    0.80
 -15   2 -15   13.60    0.90
  15   2  15   12.30    1.00
 -15   2  15   11.80    1.00
 -15   3 -15    0.60    0.50
  15   3  15    1.30    0.50
 -15   3  15    0.10    0.50
 -16   0  15    0.80    0.60
 -16   0 -15   -0.10    0.60
   0   0  16   62.99    3.00
   0  -1  16   -0.20    1.30
   0   1  16   -1.00    1.20
   0  -2  16   63.09    3.20
   0   2  16   64.79    3.10
   0   3  16   -0.30    1.20
   0   4  16    6.50    1.40
   0   5  16   -0.30    1.30
   0   6  16   -0.70    1.40
   0  -6 -16    2.00    1.20
   0  -7 -16   -0.30    0.90
   0  -8 -16   18.80    1.30
  -1   0  16   96.69    3.70
   1   0  16  103.69    3.70
   1   1  16   25.10    2.40
  -1  -1  16   24.20    2.40
  -1   1  16   26.80    2.30
   1  -1  16   26.10    2.50
  -1  -2  16   32.20    2.70
   1   2  16   28.60    2.40
  -1   2  16   31.00    2.40
   1  -2  16   30.40    2.80
   1   3  16    7.40    1.50
  -1   3  16    9.20    1.40
   1   4  16   94.89    3.60
  -1   4  16   94.39    3.60
  -1  -5  16   -0.20    0.80
   1   5  16   -0.20    1.30
  -1   5  16    0.30    1.30
   1  -6 -16   38.10    2.40
   1   6  16   34.40    2.60
  -1  -6  16   36.80    1.80
  -1  -6 -16   36.50    2.40
  -1   6  16   34.00    2.60
   1  -7 -16    2.40    0.90
   1   7  16    2.90    1.50
  -1  -7 -16    1.00    0.90
   1  -8 -16   49.99    1.90
  -1  -8 -16   47.30    1.90
  -2   0  16  132.49    4.30
   2   0  16  127.89    4.30
  -2  -1  16   14.20    1.60
   2  -1  16   17.60    2.40
   2   2  16   16.00    2.20
  -2  -2  16   12.20    2.40
  -2   2  16   11.60    1.40
   2  -2  16   13.70    1.90
   2   3  16    0.60    1.30
  -2   3  16   -0.70    1.20
   2   4  16   14.30    1.60
  -2  -4  16   12.70    1.50
  -2   4  16    9.90    1.50
   2   5  16    2.00    1.30
  -2  -5  16    1.20    0.80
  -2   5  16    2.30    1.30
  -2  -6  16    5.90    0.90
   2   6  16    7.90    1.50
   2  -6 -16    7.40    1.30
  -2  -6 -16    7.30    1.30
  -2   6  16    5.90    1.60
   2   7  16   17.70    1.80
   2  -7 -16   18.70    1.60
  -2  -7  16   14.80    1.10
  -2  -7 -16   18.30    1.70
   2  -8 -16    6.20    0.90
  -2  -8 -16    5.70    0.90
  -3   0  16    3.10    2.10
   3   1  16    2.30    1.30
  -3  -1  16    2.70    2.00
  -3   1  16    2.20    1.10
   3   2  16   40.70    2.60
  -3  -2  16   44.40    2.70
  -3   2  16   45.90    2.50
   3  -2  16   39.70    4.30
   3   3  16   14.70    1.60
  -3   3  16   18.30    2.20
   3   4  16    6.90    1.50
  -3  -4  16   11.10    1.40
  -3   4  16    9.80    1.50
  -3  -5  16  121.79    3.60
   3   5  16  121.79    4.00
  -3   5  16  119.29    4.00
  -3  -6  16   -0.60    0.70
   3  -6 -16    0.10    1.10
  -3   6  16   -0.20    1.60
  -3  -6 -16    1.60    1.10
  -3  -7  16   22.70    1.30
   3   7  16   22.90    2.30
   3  -7 -16   27.00    1.80
  -3  -7 -16   25.80    1.70
   3  -8 -16   27.40    1.60
  -3  -8 -16   31.40    1.50
   4   0  16  256.47    7.00
  -4   0  16  265.37    6.90
   4   1  16   11.20    1.50
  -4  -1  16   11.70    1.50
  -4   1  16   12.20    1.50
   4  -1  16   14.10    1.70
   4   2  16   77.09    3.40
  -4  -2  16   75.99    3.20
   4  -2  16   81.09    3.50
  -4   2  16   73.29    3.10
   4   3  16   12.50    1.60
  -4  -3  16   14.20    2.50
  -4   3  16   11.70    1.50
   4   4  16    0.90    1.20
  -4  -4  16    1.50    0.90
  -4   4  16    0.50    1.10
  -4  -5  16    0.70    0.80
   4   5  16    1.00    1.20
  -4   5  16   -0.10    1.10
  -4  -5 -16    0.70    1.20
   4   6  16    4.40    1.30
   4  -6 -16    5.20    1.30
  -4  -6  16    1.80    0.70
  -4   6  16    3.90    1.30
  -4  -6 -16    3.20    1.10
  -4  -7  16   -0.30    0.60
   4   7  16    0.90    1.30
   4  -7 -16    1.10    1.10
  -4  -7 -16    0.30    0.80
  -4  -8 -16   -0.20    0.60
  -5   0  16 1093.59   23.90
   5   0  16 1077.19   24.00
   5   1  16   71.59    3.20
  -5  -1  16   72.39    3.00
  -5   1  16   77.39    3.00
   5  -1  16   77.09    3.30
   5   2  16   59.59    3.00
  -5  -2  16   65.29    2.90
   5  -2  16   61.39    3.20
  -5   2  16   57.49    2.70
  -5  -3  16   16.20    2.20
   5   3  16   15.30    2.10
  -5   3  16   16.40    1.90
   5   4  16    0.10    1.20
  -5  -4  16    0.30    0.80
  -5   4  16    0.60    1.10
   5  -5 -16   53.59    2.90
   5   5  16   52.49    2.60
  -5  -5  16   53.19    2.20
  -5  -5 -16   55.09    2.80
  -5   5  16   59.49    2.60
   5   6  16   53.99    2.50
   5  -6 -16   54.29    2.60
  -5  -6 -16   52.09    3.80
  -5   6  16   55.09    2.60
   5   7  16   21.90    2.00
  -5  -7  16   21.20    1.20
  -5  -7 -16   24.50    1.60
  -5  -8 -16    1.40    0.60
  -6   0  16   63.49    2.80
   6   0  16   63.99    3.00
   6   1  16    1.30    1.20
  -6  -1  16    1.70    1.10
  -6   1  16    0.70    1.00
   6  -1  16    1.80    1.30
  -6  -2  16   60.49    2.80
   6   2  16   64.79    3.00
  -6   2  16   61.69    2.80
   6  -2  16   62.39    3.20
  -6  -3  16    4.80    1.80
   6   3  16    5.50    1.30
  -6   3  16    5.60    1.20
  -6  -4  16    1.50    0.80
   6   4  16   -0.20    1.10
  -6   4  16    2.10    1.10
  -6  -4 -16    2.40    1.30
   6  -5 -16    6.50    2.20
  -6  -5  16    2.40    0.80
   6   5  16    4.50    1.20
  -6   5  16    3.90    1.10
  -6  -5 -16    3.90    1.20
  -6  -6  16    0.00    0.70
   6   6  16    0.20    1.00
  -6   6  16    2.20    1.10
  -6  -6 -16    1.20    1.00
   6   7  16    2.80    1.10
  -6  -7  16    0.10    0.50
  -6  -7 -16    1.60    0.80
  -6  -8 -16    0.50    0.60
  -7   0  16  407.36    9.70
   7   0  16  405.36    9.90
  -7  -1  16    0.20    1.00
   7   1  16    1.40    1.20
   7  -1  16    0.20    1.20
  -7   1  16    0.60    1.00
  -7  -2  16  131.59    4.10
   7   2  16  138.89    4.40
  -7   2  16  135.29    4.20
   7  -2  16  134.89    4.40
   7   3  16   92.09    3.50
  -7  -3  16   95.29    5.20
  -7  -3 -16   88.29    3.70
  -7   3  16   86.29    3.20
   7   4  16   -1.50    1.00
  -7  -4  16   -0.50    0.80
  -7  -4 -16   -0.10    1.20
  -7   4  16    1.60    1.00
  -7  -5  16   43.10    1.90
   7   5  16   47.30    2.40
  -7  -5 -16   46.60    2.50
   7   6  16   18.50    1.70
  -7  -6  16   14.10    1.10
  -7  -6 -16   17.70    1.60
  -7   6  16   16.00    1.70
   7   7  16    5.00    1.00
  -7  -7  16    2.10    0.60
  -7  -7 -16    3.10    0.80
  -8   0  16    1.90    1.00
   8   0  16    3.20    1.10
   8   1  16   -1.10    1.10
  -8  -1  16   -0.60    0.90
   8  -1  16    0.10    1.20
  -8   1  16    0.50    0.90
  -8  -2  16   21.50    2.00
   8   2  16   18.80    2.00
   8  -2  16   19.20    1.90
  -8   2  16   22.60    1.80
   8   3  16   38.50    2.40
  -8  -3 -16   41.90    2.70
  -8   3  16   36.10    2.10
   8   4  16    1.00    0.90
  -8   4  16    0.80    0.90
  -8  -4 -16    0.60    1.10
   8   5  16   -0.50    0.90
  -8  -5 -16    0.00    1.00
  -8   5  16   -0.50    0.90
   8   6  16    6.90    1.00
  -8  -6 -16    8.20    1.30
  -8   6  16    8.50    1.10
   8   7  16    0.30    1.50
  -8  -7 -16    0.60    0.70
   9   0  16    0.10    1.10
  -9   0  16    1.70    0.90
   9   1  16    7.70    1.30
  -9  -1  16    9.80    1.20
  -9   1  16    7.80    1.10
   9  -1  16    7.20    1.30
  -9  -2  16   32.10    2.00
   9   2  16   32.80    2.10
  -9  -2 -16   31.50    3.00
  -9   2  16   31.90    2.00
   9   3  16   46.70    2.30
  -9  -3 -16   40.10    2.80
  -9   3  16   44.40    2.20
   9   4  16    8.20    1.20
  -9  -4 -16    9.60    1.40
   9   5  16   -0.60    0.90
  -9   5  16   -1.60    0.80
  -9  -5 -16    0.90    1.00
   9   6  16    8.50    1.00
  -9  -6 -16    9.70    1.30
  -9   6  16    9.50    1.10
   9   7  16    0.00    0.80
  -9  -7 -16    0.50    0.70
  10   0  16   20.60    1.90
 -10   0  16   23.20    1.70
 -10  -1  16   13.20    1.50
  10   1  16   14.30    1.80
  10  -1  16   10.20    1.40
 -10   1  16   13.10    1.50
  10   2  16   19.00    1.80
 -10  -2  16   21.90    1.80
 -10   2  16   20.60    1.70
  10   3  16    2.10    1.00
 -10   3  16    0.00    0.80
 -10  -3 -16   -1.40    1.50
  10   4  16    0.70    0.90
 -10  -4 -16    0.40    1.20
 -10   4  16    1.30    0.80
  10   5  16    4.10    0.80
 -10  -5 -16    3.40    1.10
 -10   5  16    5.00    0.90
  10   6  16    1.30    0.80
 -10   6  16    1.70    1.20
 -10  -6 -16    3.80    0.90
  11   0  16   57.39    2.40
 -11   0  16   57.99    2.30
  11   1  16   35.70    2.00
 -11  -1  16   37.10    1.90
  11  -1  16   33.80    2.10
 -11   1  16   38.90    1.90
  11   2  16    8.90    1.30
 -11  -2  16    9.10    1.10
 -11   2  16    7.80    1.10
 -11  -2 -16    9.60    1.20
  11   3  16    2.30    0.90
 -11   3  16    2.10    0.80
  11   4  16    6.30    0.90
 -11   4  16    5.40    0.90
  11   5  16    3.00    0.80
 -11   5  16    4.50    0.80
  11   6  16    0.40    0.60
 -11   6  16   -0.30    0.80
  12   0  16    1.40    0.90
 -12   0  16   -0.10    0.80
 -12  -1  16    1.10    0.80
  12   1  16    0.90    0.80
 -12   1  16    0.00    0.70
  12  -1  16    0.80    1.20
 -12  -2  16    9.00    1.00
  12   2  16    7.40    1.00
 -12   2  16    6.60    0.90
  12   3  16    4.70    0.90
 -12   3  16    5.30    0.80
  12   4  16    3.40    0.70
 -12   4  16    3.30    0.70
  12   5  16    0.50    0.60
 -12   5  16    0.30    0.60
  13   0  16    1.20    0.90
 -13   0 -16    0.90    0.70
 -13   0  16   -0.60    0.60
  13   1  16    0.40    0.80
 -13  -1  16    0.70    0.70
 -13   1  16    0.40    0.60
 -13  -1 -16    0.00    0.70
 -13  -2  16    1.50    1.00
  13   2  16    1.40    0.70
 -13   2  16    1.60    0.70
  13   3  16    4.40    0.70
 -13   3  16    5.10    0.70
  13   4  16    5.40    0.70
 -13   4  16    5.10    0.70
  14   0  16    3.10    1.30
 -14   0 -16    2.30    0.60
 -14   0  16    2.00    0.60
 -14  -1  16    3.30    0.70
 -14   1 -16    4.50    0.70
  14   1  16    3.70    0.80
 -14  -1 -16    5.10    1.10
 -14   1  16    2.30    0.60
 -14   2 -16    2.10    0.60
  14   2  16    0.70    0.60
 -14   2  16    1.80    0.60
  14   3  16    1.70    0.60
 -14   3 -16   -0.30    0.50
 -14   3  16    0.10    0.50
 -15   0  16   12.20    1.00
 -15   0 -16   12.10    1.00
  15   1  16    1.00    0.70
 -15  -1  16    1.90    0.80
 -15   1 -16    0.80    0.50
 -15   1  16    0.90    0.50
  15   2  16    5.20    0.70
 -15   2 -16    5.60    0.80
 -15   2  16    4.50    0.60
   0   0  17    1.20    1.10
   0  -1  17   -1.30    1.20
   0   1  17   -0.70    1.10
   0   2  17   12.20    1.50
   0  -2  17   12.20    1.70
   0   3  17    0.10    1.10
   0   4  17   10.90    1.50
   0   5  17   -0.80    1.20
   0   6  17   49.20    2.60
   0  -6 -17   60.69    3.30
   0   7  17    0.50    1.40
   0  -7 -17   -0.10    0.80
   0  -8 -17    1.10    0.70
   1   0  17   -0.10    1.20
  -1   0  17    1.60    1.20
   1   1  17   12.90    1.50
  -1  -1  17   13.60    1.60
   1  -1  17   15.40    1.60
  -1   1  17   14.80    2.00
  -1  -2  17   -2.10    1.30
   1   2  17    1.50    1.20
   1  -2  17    1.50    1.50
  -1   2  17    2.30    1.20
   1   3  17    2.50    1.20
  -1   3  17    1.90    1.20
   1   4  17    7.60    1.40
  -1   4  17    6.60    1.40
   1   5  17   19.60    2.10
  -1   5  17   17.90    2.10
   1   6  17    1.50    1.30
   1  -6 -17   -0.70    1.40
  -1   6  17    0.60    1.20
  -1  -6 -17    3.10    1.40
   1  -7 -17    3.90    0.90
   1   7  17    3.00    1.30
  -1  -7 -17    3.80    0.90
  -1   7  17    4.40    1.50
   1  -8 -17   18.80    1.20
  -1  -8 -17   17.90    1.20
   2   0  17   -0.60    1.10
  -2   0  17   -1.40    1.10
   2   1  17   24.90    2.30
  -2  -1  17   26.50    2.30
  -2   1  17   24.30    2.20
   2  -1  17   23.90    2.50
  -2  -2  17    7.50    1.50
   2   2  17    7.30    1.30
  -2   2  17    4.10    1.20
   2  -2  17    6.90    1.60
   2   3  17   30.90    2.30
  -2   3  17   26.90    2.20
   2   4  17   -0.10    1.20
  -2   4  17    1.60    1.10
   2   5  17   15.50    2.00
  -2  -5 -17   12.90    2.00
  -2   5  17   14.70    2.00
   2   6  17    2.70    1.20
   2  -6 -17    0.20    1.00
  -2   6  17   -0.40    1.20
   2  -7 -17    0.90    0.80
   2   7  17    3.10    1.30
  -2  -7 -17    1.20    0.70
   2  -8 -17    7.00    1.10
  -2  -8 -17    6.10    0.90
  -3   0  17   -0.30    1.00
   3   0  17   -0.40    1.20
  -3  -1  17  130.49    4.20
   3   1  17  133.39    4.40
   3  -1  17  134.19    4.40
  -3   1  17  133.69    4.20
   3   2  17   -1.40    1.10
  -3  -2  17   -0.60    1.30
   3  -2  17   -0.70    1.40
  -3   2  17    0.20    1.00
   3   3  17    0.90    1.10
  -3   3  17    1.40    1.10
   3   4  17    3.30    1.20
  -3   4  17    2.80    1.10
   3   5  17    9.10    1.40
  -3   5  17    8.20    1.30
  -3  -5 -17    9.70    1.40
   3   6  17    8.00    1.30
   3  -6 -17    5.60    1.20
  -3  -6 -17    6.60    1.20
  -3   6  17    5.20    1.20
   3   7  17   11.30    1.40
   3  -7 -17   13.00    1.50
  -3  -7 -17   10.80    1.30
  -3  -8 -17   -0.30    0.60
  -4   0  17    1.30    1.10
   4   0  17   -0.60    1.20
  -4  -1  17  112.69    3.80
  -4   1  17  113.49    3.80
   4  -1  17  116.19    4.00
   4   2  17   55.09    2.80
  -4  -2  17   54.99    2.80
   4  -2  17   52.89    3.00
  -4   2  17   56.79    2.70
   4   3  17   29.60    2.30
  -4   3  17   30.50    2.20
   4   4  17   25.30    2.20
  -4   4  17   21.60    2.00
   4   5  17    0.20    1.10
  -4   5  17    0.30    1.10
  -4  -5 -17    1.20    1.10
   4   6  17    0.10    1.00
   4  -6 -17    0.50    1.10
  -4   6  17   -1.60    1.10
  -4  -6 -17   -0.80    0.90
   4  -7 -17    1.30    1.10
   4   7  17    0.00    1.10
  -4  -7 -17    0.60    0.70
  -4  -8 -17    0.70    0.60
  -5   0  17   -1.40    1.00
   5   0  17    0.20    1.10
   5   1  17  123.49    4.10
  -5  -1  17  122.99    4.00
  -5   1  17  123.39    4.00
   5  -1  17  122.29    4.10
   5   2  17   25.00    2.10
  -5  -2  17   19.10    2.10
  -5   2  17   24.00    2.00
   5  -2  17   22.30    2.60
   5   3  17    8.30    1.30
  -5   3  17    8.70    1.30
   5   4  17    4.00    1.20
  -5  -4 -17    3.30    1.30
  -5   4  17    3.90    1.10
   5  -5 -17    2.00    1.50
   5   5  17    2.10    1.10
  -5  -5 -17    4.80    1.20
  -5   5  17    3.80    1.20
   5  -6 -17    2.50    1.20
   5   6  17    0.40    1.00
  -5   6  17    2.00    1.10
  -5  -6 -17    1.90    0.90
   5   7  17    7.90    1.20
  -5  -7 -17    9.00    1.20
   6   0  17   -0.80    1.10
  -6   0  17   -1.60    0.90
   6   1  17  115.29    4.00
  -6  -1  17  120.39    3.80
  -6   1  17  114.29    3.80
   6  -1  17  117.79    3.90
  -6  -2  17   21.70    2.10
   6   2  17   22.50    2.10
  -6   2  17   20.10    1.80
   6  -2  17   23.10    2.50
   6   3  17    6.90    1.30
  -6   3  17    6.20    1.10
   6   4  17   -0.60    1.00
  -6  -4 -17    0.10    1.10
  -6   4  17   -0.60    1.00
   6   5  17   14.30    1.70
   6  -5 -17   13.70    2.10
  -6   5  17   12.60    1.30
  -6  -5 -17   13.40    2.60
   6   6  17    7.70    1.10
  -6   6  17    5.60    1.10
  -6  -6 -17    5.90    1.00
   6   7  17   12.50    1.40
  -6  -7 -17   14.40    1.30
   7   0  17    1.80    1.10
  -7   0  17    0.50    0.90
   7   1  17   75.89    3.20
  -7  -1  17   79.59    3.00
  -7   1  17   76.29    3.00
   7  -1  17   82.79    3.10
   7   2  17   25.00    2.10
  -7  -2  17   24.30    2.00
  -7   2  17   24.50    1.90
   7  -2  17   23.50    2.60
   7   3  17   12.10    1.50
  -7  -3 -17   11.30    1.60
  -7   3  17   15.20    1.70
   7   4  17    2.40    1.00
  -7   4  17    1.80    1.00
  -7  -4 -17    3.30    1.20
   7   5  17   37.10    2.00
  -7   5  17   36.40    1.90
  -7  -5 -17   33.60    2.10
   7   6  17   -0.80    0.80
  -7   6  17   -0.60    1.00
  -7  -6 -17    1.00    0.80
   7   7  17    3.60    0.90
  -7  -7 -17    2.90    0.70
   8   0  17    0.00    1.00
  -8   0  17   -0.30    0.90
   8   1  17    8.10    1.30
  -8  -1  17    8.40    1.20
   8  -1  17    9.90    1.40
  -8   1  17    7.80    1.20
   8   2  17   -0.10    1.00
  -8  -2  17   -0.30    1.00
  -8   2  17    0.70    0.90
  -8  -2 -17    0.90    1.40
   8   3  17    7.70    1.30
  -8   3  17    8.50    1.20
  -8  -3 -17    9.30    1.50
  -8   4  17    0.30    0.90
  -8  -4 -17    2.00    1.20
   8   5  17   23.90    1.70
  -8   5  17   24.80    1.60
  -8  -5 -17   23.70    1.70
   8   6  17   -0.90    0.80
  -8   6  17    2.50    0.90
  -8  -6 -17    0.20    0.80
   8   7  17    2.40    0.80
  -8  -7 -17    1.60    1.00
   9   0  17    1.10    1.00
  -9   0  17   -0.60    0.80
  -9  -1  17   35.00    2.00
   9   1  17   35.00    2.10
   9  -1  17   38.00    2.20
  -9   1  17   35.30    2.00
   9   2  17    1.60    1.00
  -9  -2  17    2.20    1.00
  -9   2  17   -0.70    0.80
   9   3  17    1.00    0.90
  -9  -3 -17    1.40    1.30
  -9   3  17    0.40    0.80
   9   4  17    5.50    1.00
  -9  -4 -17    6.10    1.20
  -9   4  17    4.50    0.90
   9   5  17   -0.10    0.70
  -9  -5 -17    0.10    0.90
  -9   5  17    0.00    0.70
   9   6  17    2.30    0.70
  -9  -6 -17    1.70    0.80
  10   0  17    0.40    0.90
 -10   0  17    0.50    0.80
  10   1  17   -0.50    0.90
 -10  -1  17   -0.60    0.80
 -10   1  17    0.50    0.80
  10  -1  17    0.60    1.20
  10   2  17    0.70    0.90
 -10  -2  17    0.50    0.90
 -10   2  17    0.40    0.80
  10   3  17   16.50    1.60
 -10   3  17   19.00    1.50
 -10  -3 -17   19.90    2.90
  10   4  17    0.50    0.70
 -10   4  17    0.20    0.70
 -10  -4 -17    0.40    1.30
  10   5  17    1.20    0.70
 -10  -5 -17    0.10    1.00
 -10   5  17    0.00    0.70
  10   6  17    7.50    1.00
 -10  -6 -17    8.30    1.20
 -10   6  17    6.40    0.90
  11   0  17   -1.50    0.90
 -11   0  17    0.00    0.70
 -11  -1  17    7.30    1.00
  11   1  17    7.00    1.00
  11  -1  17    8.60    1.20
 -11   1  17    6.70    1.00
 -11  -2  17   -0.60    0.90
  11   2  17   -0.70    0.70
 -11   2  17    1.50    0.70
  11   3  17    4.00    0.80
 -11   3  17    1.80    0.70
  11   4  17    1.80    0.70
 -11   4  17    1.60    0.70
  11   5  17    5.50    0.80
 -11   5  17    4.90    0.80
  12   0  17   -0.90    0.80
 -12   0  17   -1.30    0.60
  12   1  17    7.60    1.00
 -12  -1  17    8.00    0.90
 -12  -1 -17   10.90    1.20
 -12   1  17    7.90    1.10
 -12  -2  17    0.80    1.00
  12   2  17   -1.20    0.70
 -12   2  17    0.10    0.60
  12   3  17    8.30    1.10
 -12   3  17    7.60    1.00
  12   4  17    8.50    1.00
 -12   4  17    9.10    1.00
 -13   0 -17    0.40    0.60
 -13   0  17   -0.70    0.60
  13   0  17   -0.30    0.90
  13   1  17   26.90    1.40
 -13  -1  17   26.50    1.40
 -13  -1 -17   26.90    1.50
 -13   1  17   27.90    1.30
  13   2  17    2.20    0.70
 -13   2  17    0.80    0.60
  13   3  17    3.10    0.70
 -13   3  17    1.20    0.60
 -14   0  17   -0.50    0.60
 -14   0 -17    0.00    0.60
 -14   1 -17    0.70    0.50
  14   1  17    3.10    1.10
 -14  -1  17    0.30    0.70
 -14   1  17    2.30    0.60
 -14   2 -17    2.20    0.50
  14   2  17    1.10    0.60
 -14   2  17    1.40    0.50
   0   0  18  117.09    4.00
   0   1  18   -0.90    1.00
   0  -1  18    1.20    1.20
   0  -2  18    1.90    1.40
   0   2  18    1.60    1.10
   0   3  18    0.30    1.10
   0   4  18   41.40    2.40
   0   5  18   -0.20    1.10
   0   6  18   -0.60    1.10
   0  -6 -18    0.80    0.90
   0   7  18   -0.10    1.30
   0  -7 -18    0.20    0.70
  -1   0  18   11.40    1.40
   1   0  18    9.90    1.40
  -1  -1  18   -0.50    1.10
   1   1  18   -0.20    1.10
   1  -1  18   -0.60    1.20
  -1   1  18    0.40    1.10
   1   2  18    8.10    1.30
  -1  -2  18    8.80    1.50
   1  -2  18    5.20    1.50
  -1   2  18    7.40    1.30
   1   3  18    2.00    1.20
  -1   3  18    1.60    1.10
   1   4  18    1.30    1.10
  -1   4  18    2.40    1.20
   1   5  18    0.60    1.10
  -1  -5 -18   -0.20    1.00
  -1   5  18    1.30    1.10
   1   6  18   31.20    2.10
   1  -6 -18   33.90    1.90
  -1  -6 -18   35.60    2.00
  -1   6  18   32.20    2.10
   1   7  18    0.40    1.20
   1  -7 -18    0.00    0.70
  -1  -7 -18    0.30    0.70
  -2   0  18   39.70    2.40
   2   0  18   35.60    2.40
  -2  -1  18  203.98    5.50
   2   1  18  190.18    5.60
   2  -1  18  195.38    5.50
  -2   1  18  195.98    5.50
   2   2  18   36.00    2.40
  -2  -2  18   34.30    2.50
   2  -2  18   32.80    2.60
  -2   2  18   37.40    2.30
   2   3  18    7.40    1.40
  -2   3  18    7.50    1.30
   2   4  18    5.70    1.30
  -2   4  18    9.90    1.30
   2   5  18    1.20    1.10
  -2   5  18    3.40    1.20
  -2  -5 -18    1.10    1.10
   2  -6 -18   18.30    1.60
   2   6  18   22.50    1.90
  -2  -6 -18   19.90    1.60
  -2   6  18   23.80    1.90
   2   7  18    1.00    1.20
   2  -7 -18    4.30    0.90
  -2  -7 -18    3.90    0.80
  -2   7  18    5.60    1.50
   3   0  18   32.70    2.40
  -3   0  18   35.90    2.30
  -3  -1  18   34.20    2.30
   3   1  18   31.80    2.30
   3  -1  18   31.30    2.30
  -3   1  18   34.80    2.30
  -3  -2  18    4.60    1.30
   3   2  18    5.40    1.40
  -3   2  18    3.60    1.10
   3  -2  18    4.80    1.50
   3   3  18    0.80    1.10
  -3   3  18   -1.00    0.90
   3   4  18    2.20    1.10
  -3   4  18    1.30    1.10
  -3   5  18    1.80    1.30
  -3  -5 -18    2.20    1.10
   3  -6 -18    1.00    0.90
   3   6  18    1.90    1.00
  -3   6  18   -0.20    1.00
  -3  -6 -18    0.10    0.80
   3   7  18    0.50    1.70
   3  -7 -18    0.20    0.90
  -3  -7 -18    0.60    0.60
  -4   0  18   98.29    3.40
   4   0  18   94.19    3.50
   4   1  18    5.00    1.30
  -4  -1  18    7.00    1.20
  -4   1  18    4.60    1.10
   4  -1  18    3.90    1.30
   4   2  18    5.20    1.30
  -4  -2  18    7.20    1.30
  -4   2  18    6.30    1.20
   4  -2  18    4.70    1.50
   4   3  18    3.60    1.20
  -4   3  18    4.10    1.10
   4   4  18   27.50    2.10
  -4   4  18   25.30    1.90
   4   5  18    1.00    1.00
   4  -5 -18   -0.20    1.00
  -4   5  18    1.30    1.10
   4  -6 -18   19.10    1.60
   4   6  18   18.60    1.70
  -4   6  18   17.70    1.80
  -4  -6 -18   22.50    1.60
   4   7  18   23.00    1.90
   4  -7 -18   29.20    1.70
  -4  -7 -18   35.80    1.60
   5   0  18   15.90    2.00
  -5   0  18   17.70    1.90
   5   1  18   13.60    1.50
  -5  -1  18   17.90    1.80
   5  -1  18   15.40    2.10
  -5   1  18   15.20    1.80
  -5  -2  18   11.70    1.40
   5   2  18    9.70    1.40
  -5   2  18    9.60    1.30
   5  -2  18   12.00    1.60
   5   3  18   -1.00    0.90
  -5   3  18   -0.40    0.90
   5   4  18   13.80    1.80
  -5   4  18   14.50    1.70
  -5  -4 -18   16.60    1.90
   5   5  18   -0.30    1.00
   5  -5 -18    1.10    1.10
  -5  -5 -18    0.40    1.00
  -5   5  18    0.30    0.90
   5   6  18    3.20    0.90
   5  -6 -18    4.90    1.20
  -5  -6 -18    4.20    0.90
  -5   6  18    3.00    1.00
   5   7  18    0.10    1.00
  -5  -7 -18   -0.10    0.70
   6   0  18   55.79    2.70
  -6   0  18   56.49    2.50
  -6  -1  18    2.30    1.00
   6   1  18   -0.30    1.00
  -6   1  18    1.50    0.90
   6  -1  18    2.20    1.20
  -6  -2  18   35.90    2.20
   6   2  18   38.40    2.30
   6  -2  18   34.40    2.60
  -6   2  18   38.20    2.10
   6   3  18   73.49    3.00
  -6   3  18   70.59    2.70
   6   4  18   10.40    1.30
  -6  -4 -18    7.60    1.40
  -6   4  18    8.20    1.10
   6   5  18    1.80    1.00
   6  -5 -18    2.70    1.30
  -6  -5 -18    3.00    0.90
  -6   5  18    3.50    1.00
   6   6  18    5.70    1.00
  -6  -6 -18    5.30    0.90
  -6   6  18    5.90    1.00
   6   7  18    0.50    0.80
  -6  -7 -18    0.50    0.60
  -7   0  18   43.10    2.20
   7   0  18   42.50    2.30
   7   1  18   20.90    1.90
  -7  -1  18   21.20    1.80
   7  -1  18   21.40    2.00
  -7   1  18   24.40    1.80
   7   2  18    8.20    1.30
  -7  -2  18    6.70    1.20
  -7   2  18    5.70    1.10
   7   3  18    1.00    1.00
  -7   3  18    2.00    0.90
  -7  -3 -18    0.50    1.20
   7   4  18    0.40    0.90
  -7  -4 -18    1.60    1.10
  -7   4  18    0.30    0.90
   7   5  18   -0.60    0.70
  -7  -5 -18    0.40    0.80
  -7   5  18   -1.10    0.80
   7   6  18    2.00    0.80
  -7   6  18    3.30    0.90
  -7  -6 -18    2.80    0.80
  -8   0  18   67.39    2.60
   8   0  18   68.69    2.70
   8   1  18   66.69    2.70
  -8  -1  18   65.59    2.50
  -8   1  18   65.59    2.60
   8  -1  18   65.69    2.70
   8   2  18   11.30    1.30
  -8  -2  18   13.60    1.90
  -8   2  18   14.30    1.50
   8   3  18   34.50    2.20
  -8   3  18   33.60    2.90
  -8  -3 -18   32.20    2.30
   8   4  18   -1.00    0.70
  -8  -4 -18    1.40    1.00
  -8   4  18    1.40    0.80
   8   5  18   -1.40    0.70
  -8   5  18    0.20    0.70
  -8  -5 -18    1.40    0.90
   8   6  18   11.50    1.20
  -8  -6 -18   12.70    1.20
  -8   6  18   12.60    1.70
  -9   0  18   31.30    1.80
   9   0  18   27.30    1.90
   9   1  18    2.60    1.00
  -9  -1  18    2.50    1.00
   9  -1  18    2.10    1.10
  -9   1  18    2.10    0.90
  -9  -2  18   16.70    1.60
  -9  -2 -18   16.00    2.40
   9   3  18    0.70    0.90
  -9   3  18    0.40    0.70
  -9  -3 -18   -0.20    1.20
   9   4  18    2.40    0.80
  -9  -4 -18    1.80    1.10
  -9   4  18    3.20    0.80
   9   5  18    1.90    0.70
  -9  -5 -18    1.70    0.90
  -9   5  18    0.50    0.70
  -9  -6 -18   -0.20    0.70
  -9   6  18    1.60    0.80
 -10   0  18   21.90    1.50
  10   0  18   20.80    1.60
 -10  -1  18    1.00    0.80
  10   1  18    3.50    0.90
 -10   1  18    2.30    0.80
  10  -1  18    4.20    1.10
  10   2  18    4.00    0.90
 -10  -2  18    5.30    1.00
 -10   2  18    3.30    0.80
  10   3  18    0.20    0.70
 -10   3  18   -0.80    0.60
  10   4  18    3.80    0.80
 -10   4  18    4.30    0.80
 -10  -4 -18    2.20    2.00
  10   5  18   -0.10    0.60
 -10   5  18   -0.10    0.60
 -10  -5 -18   -1.10    1.00
  11   0  18   54.79    2.10
 -11   0  18   56.59    2.00
 -11  -1  18    0.60    0.70
  11   1  18    0.60    0.80
 -11   1  18    0.70    0.70
  11   2  18    1.90    0.80
 -11  -2  18   -2.30    1.00
 -11   2  18    1.10    0.60
  11   3  18    2.90    0.80
 -11   3  18    3.90    0.70
  11   4  18    0.90    0.60
 -11   4  18    0.40    0.60
  12   0  18    1.80    0.90
 -12   0  18   -0.30    0.60
 -12  -1  18    1.60    0.70
  12   1  18    1.70    0.70
 -12   1  18    1.80    0.60
 -12  -1 -18    2.50    0.80
  12   2  18    0.20    0.60
 -12   2  18    1.10    0.60
  12   3  18    2.50    0.70
 -12   3  18    2.20    0.60
  12   4  18    0.10    0.50
 -12   4  18    0.00    0.50
 -13   0 -18   10.00    1.00
 -13   0  18    9.60    1.00
 -13   1 -18    0.20    0.50
 -13  -1  18    1.00    0.80
  13   1  18   -1.20    0.70
 -13   1  18    0.30    0.50
  13   2  18   -0.30    0.60
 -13   2  18    0.80    0.50
 -14   0 -18    0.50    0.70
 -14   0  18    1.80    0.60
   0   0  19   -1.60    1.10
   0  -1  19    3.00    1.10
   0   1  19   -0.40    1.00
   0  -2  19   69.79    3.10
   0   2  19   72.99    3.00
   0   3  19   -0.10    1.00
   0   4  19   57.59    2.60
   0  -5 -19   -0.20    0.90
   0   5  19    0.40    1.00
   0   6  19   11.50    1.20
   0  -6 -19   12.30    1.30
   0   7  19   -0.60    1.10
   0  -7 -19   -0.40    0.60
  -1   0  19    1.50    1.00
   1   0  19   -1.40    1.00
   1   1  19   77.29    3.10
  -1  -1  19   75.79    3.00
   1  -1  19   77.49    3.10
  -1   1  19   74.59    3.10
  -1  -2  19   56.09    2.80
   1   2  19   51.39    2.60
   1  -2  19   54.89    2.80
  -1   2  19   51.99    2.60
   1   3  19   20.30    2.00
  -1   3  19   23.30    2.00
   1   4  19    6.90    1.30
  -1   4  19    5.20    1.10
   1  -5 -19    1.00    0.90
   1   5  19    0.20    1.00
  -1   5  19    0.10    1.00
  -1  -5 -19    1.20    1.00
   1  -6 -19    2.40    0.80
   1   6  19    4.00    1.00
  -1   6  19    2.40    1.00
  -1  -6 -19    2.60    0.80
   1  -7 -19    0.80    0.70
   1   7  19    1.80    1.10
  -1  -7 -19    2.10    0.60
  -1   7  19    0.50    1.10
   2   0  19   -1.20    1.00
  -2   0  19    1.60    1.00
   2   1  19   75.69    3.10
  -2  -1  19   77.39    3.00
   2  -1  19   79.89    3.10
  -2   1  19   79.99    3.10
  -2  -2  19   17.00    2.10
   2   2  19   12.10    1.50
  -2   2  19   15.10    1.80
   2  -2  19   17.30    2.30
   2   3  19   20.00    2.00
  -2   3  19   18.40    1.80
   2   4  19   36.70    2.20
  -2   4  19   37.30    2.20
   2  -5 -19   24.60    1.80
   2   5  19   25.20    1.80
  -2   5  19   23.20    1.80
  -2  -5 -19   26.10    1.90
   2  -6 -19    0.60    0.80
   2   6  19    1.10    0.90
  -2  -6 -19    0.50    0.80
  -2   6  19    2.10    1.00
   2  -7 -19   -0.30    0.90
   2   7  19   -0.60    1.00
  -2  -7 -19    0.30    0.60
  -2   7  19    0.30    1.30
  -3   0  19   -1.40    1.00
   3   0  19    0.20    1.10
   3   1  19   63.39    2.80
  -3  -1  19   59.19    2.60
  -3   1  19   60.69    2.70
   3  -1  19   58.19    2.70
  -3  -2  19    4.90    1.30
   3   2  19    4.40    1.20
   3  -2  19    5.90    1.40
  -3   2  19    1.70    1.00
   3   3  19    1.00    1.10
  -3   3  19    1.00    1.00
   3   4  19    0.70    1.00
  -3   4  19    2.90    1.00
   3  -5 -19    2.40    1.00
   3   5  19    2.40    0.90
  -3   5  19    2.80    1.00
  -3  -5 -19    0.90    0.90
   3   6  19   10.70    1.50
   3  -6 -19    9.10    1.30
  -3  -6 -19    8.70    1.20
  -3   6  19    8.70    1.10
   3  -7 -19   12.50    1.20
   3   7  19   13.00    1.50
  -3  -7 -19   13.10    1.10
  -4   0  19    0.00    1.00
   4   0  19    0.30    1.00
   4   1  19    0.50    1.00
  -4  -1  19    0.40    1.00
   4  -1  19    0.60    1.10
  -4   1  19    1.50    1.00
   4   2  19    2.70    1.10
  -4  -2  19    3.70    1.20
  -4   2  19    3.60    1.00
   4  -2  19    3.90    1.40
   4   3  19   17.20    1.80
  -4   3  19   18.90    1.80
   4   4  19   -2.10    0.90
  -4  -4 -19    0.80    1.10
  -4   4  19    2.50    1.50
   4  -5 -19   15.10    1.60
   4   5  19   14.60    1.60
  -4   5  19   13.90    1.50
  -4  -5 -19   13.50    1.50
   4  -6 -19    1.90    0.90
   4   6  19    1.20    0.90
  -4   6  19    1.70    0.90
  -4  -6 -19    1.60    0.70
   4   7  19    6.60    1.00
  -4  -7 -19    8.60    0.90
  -5   0  19    0.20    0.90
   5   0  19    0.90    1.00
   5   1  19    2.10    1.00
  -5  -1  19   -0.30    1.00
  -5   1  19    1.80    0.90
   5  -1  19    1.60    1.10
   5   2  19    2.70    1.10
  -5  -2  19    3.60    1.20
  -5   2  19    2.40    1.00
   5  -2  19    3.80    1.40
   5   3  19   16.10    1.80
  -5   3  19   19.60    1.60
   5   4  19    1.90    1.00
  -5  -4 -19    1.60    1.10
  -5   4  19    3.00    0.90
   5   5  19   14.00    1.50
   5  -5 -19   11.30    1.60
  -5  -5 -19   13.00    1.40
  -5   5  19   14.20    1.50
   5   6  19   12.70    1.30
   5  -6 -19   12.10    1.70
  -5  -6 -19   12.00    1.20
  -5   6  19   10.20    1.40
  -6   0  19   -0.40    0.80
   6   0  19    1.20    1.00
  -6  -1  19   35.90    2.00
   6   1  19   37.10    2.20
   6  -1  19   37.10    2.20
  -6   1  19   37.40    2.00
  -6  -2  19    0.60    1.10
   6   2  19    1.40    1.00
  -6   2  19    0.50    0.90
   6   3  19   -1.20    0.90
  -6   3  19    1.20    0.80
   6   4  19   27.70    1.80
  -6   4  19   24.30    1.70
  -6  -4 -19   24.90    1.90
   6   5  19    2.10    0.80
   6  -5 -19    1.40    1.20
  -6  -5 -19    1.70    0.80
  -6   5  19    3.30    0.90
   6   6  19    0.20    0.80
  -6  -6 -19   -0.50    0.60
  -6   6  19   -0.30    0.90
  -7   0  19   -0.20    0.90
   7   0  19   -1.10    0.90
   7   1  19   24.70    1.80
  -7  -1  19   23.10    1.70
  -7   1  19   20.80    1.60
   7  -1  19   22.10    2.00
  -7  -2  19    3.80    1.10
   7   2  19    3.50    1.00
  -7   2  19    4.80    1.00
   7   3  19   15.30    1.60
  -7  -3 -19   15.70    1.80
  -7   3  19   16.50    1.50
   7  -4 -19   -0.50    1.30
   7   4  19    1.50    0.80
  -7   4  19    1.20    0.80
  -7  -4 -19    2.10    0.90
   7   5  19    7.00    1.00
  -7  -5 -19    5.40    0.90
  -7   5  19    6.00    0.90
   7   6  19    0.70    0.70
  -7   6  19   -0.90    0.80
  -7  -6 -19    0.30    0.70
  -8   0  19    0.60    0.80
   8   1  19   19.10    2.30
  -8  -1  19   21.30    1.60
   8  -1  19   19.00    1.80
  -8  -1 -19   21.00    2.50
  -8   1  19   20.70    1.50
  -8  -2  19   33.20    1.90
   8   2  19   33.80    1.80
  -8  -2 -19   34.30    2.30
  -8   2  19   34.50    1.80
   8   3  19    1.60    0.80
  -8  -3 -19    3.10    1.20
  -8   3  19    1.40    0.80
   8   4  19   12.90    1.30
  -8   4  19   14.10    1.30
  -8  -4 -19   14.50    1.50
   8   5  19    1.50    0.70
  -8  -5 -19    1.10    0.80
  -8   5  19    2.80    0.80
   9   0  19   -0.30    0.80
  -9   0  19    0.20    0.70
   9   1  19    0.90    0.90
  -9  -1  19    0.90    0.80
  -9   1  19    0.70    0.70
   9  -1  19   -1.10    1.00
  -9  -2  19    3.90    1.00
   9   2  19    4.30    0.90
  -9  -2 -19    3.80    1.60
  -9   2  19    3.50    0.80
   9   3  19    2.40    0.80
  -9   3  19    4.20    0.80
  -9  -3 -19    2.90    1.30
   9   4  19   -1.10    0.70
  -9   4  19    0.40    0.60
  -9  -4 -19   -0.40    1.00
   9   5  19    4.90    0.70
  -9   5  19    5.00    0.80
  -9  -5 -19    4.50    0.90
 -10   0  19   -0.40    0.70
  10   0  19    1.20    0.80
  10   1  19   -1.40    0.70
 -10  -1  19    2.30    0.80
 -10   1  19    0.40    0.60
  10   2  19   17.50    1.30
 -10   2  19   16.40    1.20
  10   3  19    4.40    0.80
 -10   3  19    3.80    0.70
  10   4  19   -0.60    0.60
 -10   4  19   -0.70    0.60
  11   0  19    0.60    0.80
  11   1  19   11.00    1.20
 -11  -1  19   10.80    1.20
 -11  -1 -19    8.60    0.90
 -11   1  19    8.60    1.00
  11   2  19    3.20    0.70
 -11   2  19    3.80    0.70
  11   3  19    0.10    0.60
 -11   3  19    0.50    0.60
  11   4  19    1.20    0.60
 -11   4  19    2.10    0.60
 -12   0 -19   -0.80    0.60
 -12   0  19   -0.80    0.60
  12   0  19   -0.20    1.10
  12   1  19    0.30    0.70
 -12  -1  19    0.30    1.00
 -12   1  19   -0.10    0.50
  12   2  19    1.40    0.60
 -12   2  19    1.70    0.60
  12   3  19   -0.30    0.50
 -12   3  19    1.00    0.50
 -13   0 -19    0.50    0.70
 -13   0  19    0.30    0.60
 -13   1 -19    0.50    0.50
  13   1  19   -0.60    0.80
 -13   1  19    0.40    0.50
   0   0  20   91.59    3.30
   0   1  20    0.40    1.00
   0  -1  20    1.20    1.10
   0   2  20  114.99    3.80
   0  -2  20  118.89    3.70
   0   3  20    0.10    0.90
   0   4  20   45.30    2.20
   0   5  20    1.20    0.90
   0  -5 -20   -0.30    0.80
   0   6  20   10.40    1.40
   0  -6 -20    8.60    1.10
  -1   0  20  134.89    4.10
   1   0  20  137.79    4.20
  -1  -1  20   27.60    2.00
   1   1  20   31.10    2.10
   1  -1  20   28.60    2.10
  -1   1  20   28.20    2.00
   1   2  20    9.30    1.30
  -1  -2  20   10.10    1.40
   1  -2  20   11.00    1.40
  -1   2  20   12.10    1.70
   1   3  20    8.50    1.30
  -1   3  20    8.00    1.20
   1   4  20    7.20    1.20
  -1   4  20    6.30    1.20
   1   5  20    1.60    0.90
   1  -5 -20    0.40    0.80
  -1   5  20    1.50    0.90
  -1  -5 -20    1.40    0.80
   1  -6 -20    1.00    0.70
   1   6  20    0.80    0.80
  -1   6  20    2.80    0.90
  -1  -6 -20    0.00    0.70
  -2   0  20   12.60    1.70
   2   0  20   17.80    1.90
  -2  -1  20    0.80    1.00
   2   1  20   -0.10    1.00
  -2   1  20    0.80    0.90
   2  -1  20    1.30    1.10
  -2  -2  20    2.40    1.20
   2   2  20    3.30    1.10
   2  -2  20    1.50    1.30
  -2   2  20    0.80    0.90
   2   3  20    3.80    1.10
  -2   3  20    4.10    1.10
   2   4  20    5.80    1.10
  -2   4  20    5.30    1.10
   2  -5 -20    5.60    1.00
   2   5  20    5.60    1.00
  -2  -5 -20    6.70    1.00
  -2   5  20    6.90    1.00
   2   6  20    0.40    0.80
   2  -6 -20    1.70    0.80
  -2  -6 -20    0.40    0.70
  -2   6  20    1.40    0.90
   3   0  20   -0.50    1.00
  -3   0  20   -0.30    0.90
   3   1  20   34.00    2.10
  -3  -1  20   34.70    2.10
  -3   1  20   34.00    2.00
   3  -1  20   34.40    2.20
  -3  -2  20   54.99    2.60
   3   2  20   56.59    2.60
   3  -2  20   56.69    2.80
  -3   2  20   53.49    2.50
   3   3  20    0.40    0.90
  -3   3  20    1.20    0.90
   3   4  20    1.00    0.90
  -3   4  20    1.00    0.80
   3   5  20    0.80    0.90
   3  -5 -20    2.10    0.90
  -3  -5 -20    1.80    0.80
  -3   5  20    2.10    0.90
   3   6  20    1.20    0.80
   3  -6 -20    0.10    0.80
  -3  -6 -20    0.60    0.60
  -3   6  20   -0.10    0.80
   4   0  20   14.40    1.70
  -4   0  20   12.90    1.60
  -4  -1  20    2.60    1.00
   4   1  20    1.60    1.00
  -4   1  20    2.10    1.00
   4  -1  20    2.60    1.10
  -4  -2  20    4.40    1.80
   4   2  20    4.90    1.00
  -4   2  20    3.30    1.00
   4  -2  20    4.60    1.50
   4   3  20   14.30    1.90
  -4   3  20   15.20    1.90
   4   4  20    1.00    0.90
  -4  -4 -20    0.00    0.90
  -4   4  20    0.40    0.80
   4  -5 -20   11.70    1.40
   4   5  20    7.10    1.00
  -4   5  20    8.60    1.00
  -4  -5 -20    9.30    1.30
   4  -6 -20    0.10    0.90
   4   6  20    1.60    0.80
  -4   6  20    0.60    0.90
  -4  -6 -20    0.20    0.60
   5   0  20   -0.10    1.00
  -5   0  20   -0.40    0.80
   5   1  20    6.10    1.20
  -5  -1  20    7.00    1.10
   5  -1  20    7.50    1.20
  -5   1  20    6.70    1.00
  -5  -2  20   12.00    1.30
   5   2  20   13.80    1.70
  -5   2  20   13.70    1.50
   5   3  20    2.00    1.00
  -5   3  20    2.50    0.90
   5   4  20    4.50    1.00
  -5  -4 -20    3.80    1.00
  -5   4  20    5.10    0.90
   5  -5 -20    3.10    1.00
   5   5  20    2.40    0.80
  -5  -5 -20    2.70    0.80
  -5   5  20    2.40    0.80
   5   6  20   25.70    1.40
  -5   6  20   25.60    1.50
  -5  -6 -20   27.70    1.40
   6   0  20   14.60    1.70
  -6   0  20   12.00    1.50
   6   1  20    4.60    1.10
  -6   1  20    4.30    0.90
   6  -1  20    4.30    1.10
   6   2  20    2.50    1.30
  -6  -2  20    2.40    1.10
  -6   2  20    4.60    1.20
   6   3  20    7.00    1.10
  -6  -3 -20    7.50    1.20
  -6   3  20    7.60    1.00
   6   4  20    1.80    0.80
  -6   4  20    1.90    0.80
  -6  -4 -20    3.40    1.00
   6   5  20   13.40    1.20
  -6  -5 -20   14.40    1.30
  -6   5  20   12.50    1.20
   6   6  20    1.00    0.70
  -6   6  20    1.00    0.80
  -6  -6 -20    1.00    0.70
   7   0  20    0.20    0.90
  -7   0  20    0.40    0.80
   7   1  20   20.70    1.70
  -7  -1  20   19.70    1.50
   7  -1  20   17.70    1.70
  -7   1  20   20.10    1.50
  -7  -2  20   19.20    1.70
   7   2  20   15.80    1.50
  -7   2  20   15.60    1.40
  -7  -2 -20   15.80    1.90
   7   3  20   11.50    1.30
  -7   3  20   11.60    1.30
  -7  -3 -20   13.30    1.60
   7   4  20    1.80    0.70
  -7  -4 -20    1.60    0.90
  -7   4  20    0.70    0.70
   7   5  20   11.70    1.20
  -7  -5 -20   12.60    1.20
  -7   5  20   12.70    1.20
   8   0  20   -0.20    0.80
  -8   0  20   -0.50    0.70
   8   1  20   -1.00    0.70
  -8  -1  20    0.20    0.80
  -8   1  20   -0.20    0.70
  -8  -1 -20   -0.30    1.40
   8  -1  20    0.90    1.00
   8   2  20    1.70    0.80
  -8  -2  20    0.90    1.10
  -8  -2 -20   -0.20    1.20
  -8   2  20    1.40    0.70
   8   3  20    2.40    0.80
  -8   3  20    1.90    0.70
  -8  -3 -20    1.50    1.10
   8   4  20   -0.20    0.70
  -8  -4 -20   -0.70    0.90
  -8   4  20   -0.30    0.60
   8   5  20    0.90    0.60
  -8  -5 -20    1.50    0.80
  -8   5  20    1.40    0.70
   9   0  20    8.30    0.90
  -9   0  20    8.30    1.10
   9   1  20    1.50    0.80
  -9  -1  20   -0.20    0.70
  -9   1  20    2.50    0.70
   9   2  20    4.70    0.90
  -9   2  20    5.40    0.80
   9   3  20    0.20    0.70
  -9  -3 -20    0.60    1.40
  -9   3  20    0.40    0.60
   9   4  20    4.20    0.70
  -9   4  20    6.50    0.70
  -9  -4 -20    6.60    1.10
  10   0  20    0.30    0.80
 -10   0  20    0.80    0.60
 -10  -1  20    1.50    0.80
  10   1  20    0.90    0.70
 -10   1  20    1.40    0.60
  10   2  20    0.00    0.60
 -10   2  20    0.40    0.50
  10   3  20    1.80    0.60
 -10   3  20    3.40    0.60
 -11   0  20    0.50    0.60
  11   0  20   -1.10    0.90
 -11  -1  20    2.10    0.80
  11   1  20    1.00    0.70
 -11   1  20    1.20    0.60
  11   2  20    2.80    0.70
 -11   2  20    3.80    0.60
  11   3  20    0.40    0.60
 -11   3  20    0.30    0.50
 -12   0  20    2.10    0.60
 -12   0 -20    3.70    0.70
  12   1  20    3.80    0.70
 -12   1 -20    3.70    0.60
 -12   1  20    3.30    0.60
   0   0  21    1.10    1.00
   0   1  21   -0.90    0.90
   0  -1  21   -1.10    1.00
   0   2  21   23.10    1.80
   0  -2  21   19.20    2.20
   0   3  21    0.60    0.90
   0   4  21    2.10    0.90
   0  -5 -21    0.30    0.70
   0   5  21   -0.10    0.80
   0  -6 -21    0.10    0.60
   1   0  21    0.00    0.90
  -1   0  21   -0.30    0.90
   1   1  21    3.00    1.10
  -1  -1  21    1.80    1.00
  -1   1  21    0.90    1.00
   1  -1  21    2.30    1.10
   1   2  21    9.40    1.30
  -1  -2  21   10.50    1.40
   1  -2  21    9.90    1.40
  -1   2  21   11.50    1.60
   1   3  21    0.50    0.90
  -1   3  21    0.90    0.90
   1   4  21   -1.00    0.80
  -1   4  21    0.30    0.80
   1   5  21    0.30    0.70
   1  -5 -21   -0.10    0.70
  -1  -5 -21   -0.10    0.70
  -1   5  21    1.00    0.80
   1  -6 -21   -0.30    0.60
  -1   6  21    0.70    0.80
  -1  -6 -21    0.40    0.60
  -2   0  21    0.40    0.90
   2   0  21   -0.10    0.90
  -2  -1  21   17.70    1.80
   2   1  21   20.50    1.80
   2  -1  21   23.60    1.90
  -2   1  21   18.20    1.70
   2   2  21    9.10    1.20
  -2  -2  21    7.30    1.30
   2  -2  21    9.50    1.60
  -2   2  21    7.10    1.10
   2   3  21   58.09    2.40
  -2   3  21   60.69    2.40
   2   4  21    0.10    0.70
  -2   4  21    0.40    0.80
   2  -5 -21    6.00    0.90
   2   5  21    5.60    0.90
  -2   5  21    9.10    1.30
  -2  -5 -21    4.90    0.90
   2  -6 -21    2.50    1.10
   2   6  21    2.50    0.80
  -2   6  21    1.90    0.80
  -2  -6 -21    2.40    0.60
  -3   0  21   -0.90    0.80
   3   0  21    0.50    0.90
   3   1  21    6.80    1.10
  -3   1  21    5.60    1.00
   3  -1  21    5.20    1.40
  -3  -2  21   -0.90    1.10
   3   3  21    5.40    1.00
  -3   3  21    6.50    1.00
   3   4  21    0.10    0.80
  -3  -4 -21    0.90    0.80
  -3   4  21    0.80    0.80
   3   5  21    1.80    0.80
   3  -5 -21    0.50    0.80
  -3  -5 -21    0.80    0.70
  -3   5  21    1.30    0.80
   3  -6 -21   -0.10    0.70
   3   6  21   -1.20    0.70
  -3   6  21    0.80    0.70
  -3  -6 -21   -0.40    0.50
  -4   0  21   -0.10    0.90
  -4  -1  21    1.60    0.90
  -4   1  21   -0.80    1.10
   4  -1  21   -0.50    1.00
   4   2  21    5.60    1.00
  -4  -2  21    6.00    1.20
  -4   2  21    5.60    1.00
   4   3  21    2.90    0.90
  -4   3  21    1.70    0.80
   4   4  21    1.60    0.80
  -4   4  21    1.00    0.80
  -4  -4 -21    0.40    0.80
   4  -5 -21    1.60    0.80
   4   5  21    2.20    0.70
  -4   5  21    1.20    0.70
  -4  -5 -21    1.10    0.70
   5   0  21    0.60    0.90
  -5   0  21    1.60    0.80
   5   1  21    0.80    0.90
  -5  -1  21   -0.10    0.90
  -5   1  21    0.70    0.80
   5  -1  21   -1.00    0.90
   5   2  21    5.40    1.00
  -5  -2  21    2.90    1.20
  -5   2  21    5.00    0.90
   5   3  21    3.70    0.90
  -5   3  21    3.30    0.80
  -5  -3 -21    4.30    1.00
   5   4  21    1.10    0.70
   5  -4 -21    1.20    0.90
  -5  -4 -21    2.00    0.80
  -5   4  21    1.40    0.70
   5   5  21   -0.60    0.60
   5  -5 -21   -1.70    0.90
  -5  -5 -21    0.40    0.60
  -5   5  21    0.20    0.70
  -6   0  21    1.00    0.80
   6   0  21   -1.00    0.80
  -6  -1  21    1.90    0.90
   6   1  21    2.00    0.80
   6  -1  21    1.30    1.00
  -6   1  21    2.40    0.80
  -6  -2  21    2.90    1.30
   6   2  21    4.50    0.90
  -6   2  21    5.50    0.90
   6   3  21    3.50    0.80
  -6   3  21    5.10    0.80
  -6  -3 -21    3.20    0.90
   6  -4 -21    1.60    1.00
   6   4  21    0.30    0.70
  -6   4  21    0.80    0.70
  -6  -4 -21    1.40    0.80
   6   5  21    1.20    0.60
  -6  -5 -21    0.20    0.70
  -6   5  21    0.30    0.70
  -7   0  21   -0.30    0.70
   7   0  21   -0.40    0.80
   7   1  21    2.00    0.80
  -7  -1  21    3.80    0.90
  -7   1  21    2.40    0.70
   7  -1  21    2.40    1.00
   7   2  21    0.20    0.70
  -7   2  21    0.00    0.70
  -7  -2 -21    0.70    1.00
   7   3  21   19.80    1.30
  -7  -3 -21   19.20    1.60
  -7   3  21   17.90    1.30
   7   4  21    0.70    0.70
  -7   4  21    0.80    0.60
  -7  -4 -21    1.30    0.80
   8   0  21    1.40    0.80
  -8   0  21   -0.20    0.70
   8   1  21   10.00    1.20
  -8  -1  21   11.40    1.30
  -8   1  21    9.40    1.10
   8   2  21    0.40    0.70
  -8   2  21    0.30    0.60
  -8  -2 -21    0.40    1.30
   8   3  21    0.20    0.60
  -8  -3 -21    1.00    1.40
  -8   3  21    0.60    0.60
   8   4  21    8.50    0.90
  -8   4  21    7.20    0.90
  -8  -4 -21    8.50    1.20
   9   0  21    1.10    0.80
  -9   0  21   -0.30    0.60
   9   1  21   -1.20    0.60
  -9  -1  21    1.30    0.70
  -9   1  21    1.30    0.60
   9   2  21    2.60    0.70
  -9   2  21    2.80    0.60
   9   3  21   -0.20    0.60
  -9   3  21   -0.30    0.60
 -10   0  21    0.10    0.60
  10   0  21    0.50    1.00
 -10  -1  21    2.20    0.80
  10   1  21    1.00    0.70
 -10   1  21    2.40    0.60
  10   2  21    0.60    0.60
 -10   2  21   -0.10    0.50
 -11   0 -21   -0.70    0.90
 -11   0  21   -0.30    0.60
   0   0  22   74.89    2.70
   0   1  22   -0.50    0.80
   0  -1  22   -0.10    0.90
   0   2  22   31.50    1.80
   0   3  22    0.80    0.80
   0  -4 -22    2.80    0.80
   0   4  22    2.80    0.80
   0  -5 -22    1.50    0.70
   0   5  22    0.10    0.70
   1   0  22    7.30    1.10
  -1   0  22    6.40    1.00
   1   1  22   -0.40    0.80
  -1  -1  22    1.00    0.90
   1  -1  22    1.40    0.90
  -1   1  22    0.10    0.80
   1   2  22    1.10    0.80
  -1   2  22    1.20    0.80
   1   3  22    3.50    0.90
  -1   3  22    3.70    0.80
   1   4  22    6.10    0.90
  -1   4  22    8.30    1.00
  -1  -4 -22    8.20    1.20
   1   5  22    0.40    0.70
   1  -5 -22   -0.10    0.70
  -1   5  22    0.60    0.70
  -1  -5 -22    1.30    0.60
   2   0  22    2.40    0.90
  -2   0  22    4.30    1.00
  -2  -1  22   12.40    1.50
   2   1  22   12.30    1.40
  -2   1  22   14.40    1.40
   2  -1  22   13.50    1.60
   2   2  22    4.70    0.90
  -2   2  22    4.60    0.90
   2   3  22    1.10    0.70
  -2   3  22    0.80    0.70
   2   4  22   -0.30    0.70
  -2   4  22    1.20    0.70
  -2  -4 -22    0.90    0.70
   2  -5 -22   22.20    1.20
   2   5  22   19.30    1.30
  -2  -5 -22   19.90    1.20
  -2   5  22   23.20    1.30
   3   0  22    1.00    0.80
  -3   0  22    1.00    0.80
   3   1  22   -0.10    0.80
  -3  -1  22    0.30    0.90
  -3   1  22    1.10    0.80
   3  -1  22    1.30    0.90
   3   2  22    0.30    0.80
  -3   2  22    0.70    0.80
   3   3  22    4.00    0.80
  -3   3  22    4.60    0.80
   3  -4 -22    0.80    0.70
   3   4  22    1.00    0.70
  -3   4  22    1.30    0.70
  -3  -4 -22    2.10    0.70
   3   5  22    0.90    0.60
  -3  -5 -22    0.60    0.60
  -3   5  22    0.20    0.70
   4   0  22   21.80    1.60
  -4   0  22   21.50    1.50
   4   1  22    0.90    0.80
  -4  -1  22    0.70    0.90
   4  -1  22    0.80    0.90
  -4   1  22    1.30    0.80
   4   2  22   11.80    1.30
  -4   2  22   10.40    1.20
   4   3  22    4.10    0.80
  -4   3  22    3.30    0.80
  -4  -3 -22    1.50    0.80
   4  -4 -22    2.80    0.80
   4   4  22    3.70    0.80
  -4   4  22    3.70    0.70
  -4  -4 -22    1.70    0.70
   4  -5 -22    5.90    0.90
   4   5  22    4.10    0.70
  -4  -5 -22    3.60    0.70
  -4   5  22    5.30    0.90
   5   0  22    1.00    0.80
  -5   0  22    2.90    0.80
   5   1  22   -0.20    0.70
  -5  -1  22    0.10    0.80
  -5   1  22    0.90    0.70
   5  -1  22    1.60    1.00
   5   2  22    0.80    0.70
  -5   2  22    0.70    0.70
   5   3  22    1.00    0.70
  -5   3  22   -0.10    0.60
  -5  -3 -22   -0.30    0.80
   5  -4 -22    3.20    1.20
   5   4  22    2.40    0.70
  -5   4  22    2.60    0.70
  -5  -4 -22    3.50    0.80
  -6   0  22   25.70    1.40
   6   0  22   23.60    1.50
  -6  -1  22    0.60    0.80
   6   1  22    0.90    0.70
   6  -1  22    3.90    1.20
  -6   1  22    0.40    0.70
   6   2  22   22.90    1.30
  -6   2  22   21.60    1.40
  -6  -2 -22   20.50    1.60
   6   3  22    0.20    0.60
  -6   3  22    0.40    0.60
  -6  -3 -22    0.00    0.80
   6  -4 -22    4.00    1.10
   6   4  22    3.00    0.70
  -6   4  22    2.40    0.60
  -6  -4 -22    1.90    0.70
  -7   0  22   21.40    1.30
   7   0  22   23.70    1.40
   7   1  22    8.40    1.10
  -7  -1  22    8.70    0.90
  -7  -1 -22   12.60    1.70
  -7   1  22   11.00    1.00
   7   2  22    3.50    0.70
  -7   2  22    4.20    0.70
  -7  -2 -22    3.80    1.10
   7  -3 -22    1.00    1.10
   7   3  22   -0.60    0.60
  -7  -3 -22   -1.30    1.30
  -7   3  22    0.20    0.50
  -8   0  22   54.59    1.80
   8   0  22   54.79    2.00
   8   1  22    1.70    0.70
  -8  -1  22    1.40    0.90
  -8   1  22    1.80    0.70
   8   2  22   12.60    1.00
  -8   2  22   13.70    1.00
   8   3  22   -0.60    0.50
  -8  -3 -22   -1.30    1.20
  -8   3  22   -1.00    0.50
  -9   0  22    2.50    0.70
   9   1  22   12.20    1.50
  -9   1  22   13.50    1.00
   9   2  22    8.30    1.00
  -9   2  22    9.00    0.90
   0   0  23    0.60    0.80
   0  -1  23    0.30    0.90
   0   1  23    0.50    0.70
   0   2  23    1.80    0.70
   0   3  23    0.30    0.70
   0  -4 -23    0.50    0.60
   0   4  23    1.90    0.70
  -1   0  23    0.20    0.70
   1   0  23   -0.90    0.70
  -1  -1  23    1.70    0.90
   1   1  23    2.10    0.80
  -1   1  23    0.50    0.70
   1  -1  23    1.80    0.90
   1   2  23    2.00    0.70
  -1   2  23    3.20    0.80
   1   3  23    1.00    0.70
  -1   3  23    0.60    0.70
   1  -4 -23    4.20    0.80
   1   4  23    3.70    0.70
  -1   4  23    4.00    0.70
  -1  -4 -23    3.80    0.70
  -2   0  23   -1.70    0.70
   2   0  23    0.70    0.80
   2   1  23   14.10    1.30
  -2  -1  23   19.50    1.50
  -2   1  23   15.40    1.30
   2  -1  23   14.10    1.50
   2   2  23    1.10    0.70
  -2   2  23    0.40    0.70
   2   3  23    2.80    0.70
  -2   3  23    3.80    0.70
   2   4  23    3.80    0.70
   2  -4 -23    4.20    0.70
  -2   4  23    5.20    0.70
  -2  -4 -23    4.10    0.70
   3   0  23   -0.90    0.70
  -3   0  23    0.00    0.70
   3   1  23    6.30    0.90
  -3  -1  23    5.20    0.90
   3  -1  23    7.10    1.00
  -3   1  23    6.30    0.90
   3   2  23    0.40    0.70
  -3   2  23    0.20    0.70
   3   3  23    3.40    0.80
  -3   3  23    2.70    0.70
  -3  -3 -23    2.60    0.70
   3  -4 -23    1.40    0.70
   3   4  23   -0.10    0.60
  -3  -4 -23    0.90    0.60
  -3   4  23    1.40    0.70
   4   0  23    0.50    0.80
  -4   0  23    0.00    0.70
  -4  -1  23   22.20    1.50
   4   1  23   21.00    1.30
  -4   1  23   22.70    1.30
   4  -1  23   20.90    1.70
   4   2  23    3.20    0.80
  -4   2  23    3.30    0.70
   4   3  23   21.10    1.20
  -4   3  23   18.00    1.20
  -4  -3 -23   18.20    1.30
   4  -4 -23    9.20    1.00
   4   4  23   11.60    1.00
  -4   4  23   11.20    1.00
  -4  -4 -23   11.70    1.00
  -5   0  23    0.20    0.70
   5   0  23    0.20    0.80
   5   1  23   -0.20    0.60
  -5  -1  23    2.90    0.90
  -5   1  23    0.30    0.60
   5   2  23   -0.20    0.60
  -5   2  23   -0.10    0.60
  -5  -2 -23    1.20    0.80
   5   3  23    3.20    0.70
  -5  -3 -23    2.80    0.80
  -5   3  23    3.80    0.70
   6   0  23    1.10    0.80
  -6   0  23   -0.30    0.60
  -6  -1  23   41.90    1.70
   6   1  23   42.70    1.60
  -6   1  23   44.60    1.60
  -6  -1 -23   41.10    1.90
   6   2  23    0.40    0.60
  -6  -2 -23    1.80    1.00
  -6   2  23   -0.40    0.60
   6   3  23   -0.50    0.50
   6  -3 -23    0.70    0.90
  -6   3  23    0.50    0.50
  -6  -3 -23   -0.50    0.70
   7   0  23    0.60    0.80
  -7   0  23    0.50    0.60
   7   1  23   22.10    1.20
  -7   1  23   21.40    1.10
   7   2  23    4.60    0.70
  -7   2  23    4.80    0.70
  -7  -2 -23    5.70    1.00
  -8   0  23    1.60    0.60
   8   1  23   22.10    1.20
  -8   1  23   26.00    1.60
   0   0  24   10.40    1.10
   0   1  24   -0.30    0.60
   0  -1  24   -1.80    1.50
   0   2  24    7.70    1.00
   0   3  24   -1.00    0.50
  -1   0  24   -0.20    0.70
   1   0  24   -0.90    0.70
  -1  -1  24    6.00    1.20
   1   1  24    6.90    0.80
  -1   1  24    6.50    0.80
   1   2  24    9.70    1.00
  -1   2  24    7.60    1.00
   1   3  24   -0.40    0.60
  -1   3  24    0.20    0.60
  -1  -3 -24    0.50    0.60
  -2   0  24   -0.50    0.70
   2   0  24    1.40    0.70
  -2  -1  24   -1.10    1.00
   2   1  24    0.90    0.60
  -2   1  24    0.90    0.60
   2   2  24   11.50    1.00
  -2   2  24   11.30    1.00
   2   3  24    2.30    0.60
  -2  -3 -24    2.50    0.70
  -2   3  24    2.10    0.60
   3   0  24    4.60    0.80
  -3   0  24    7.90    1.10
   3   1  24    0.50    0.60
  -3   1  24    1.70    0.60
   3   2  24    1.30    0.60
  -3   2  24    3.00    0.60
   3   3  24   -0.40    0.50
  -3  -3 -24    1.00    0.60
  -3   3  24    1.20    0.60
  -4   0  24    2.40    0.70
   4   0  24   -0.70    1.20
   4   1  24    0.50    0.60
  -4   1  24    1.10    0.60
   4   2  24    2.00    0.60
  -4  -2 -24    2.40    0.70
  -4   2  24    0.80    0.60
   5   0  24   11.90    1.20
  -5   0  24    9.60    1.10
   5   1  24   -0.90    0.70
  -5   1  24   -0.20    0.60
  -5  -1 -24    1.20    0.80
   5   2  24    7.70    0.90
  -5  -2 -24    7.80    1.10
  -5   2  24    7.90    0.90
  -6   0  24   -0.30    0.70
   6   1  24    7.70    0.90
  -6  -1 -24    5.10    1.00
  -6   1  24    6.70    0.80
   0   0  25    0.20    0.70
   0   1  25    0.70    0.80
  -1   0  25   -0.40    0.70
   1   0  25    0.80    0.70
   1   1  25    1.40    0.80
   2   0  25    0.10    0.80
  -2   0  25   -0.40    0.70
   2   1  25    0.40    0.60
  -2   1  25    1.00    0.70
   0   0   0    0.00    0.00

_computing_structure_solution     'SHELXT 2014/5 (Sheldrick, 2014)'
;
_shelx_hkl_checksum   72035
